# Supplementary material
Source: publisher site journal article supplement (https://www.spandidos-publications.com/8164/downloadSupplementary)
Supplement: Supplementary file 1 [file downloadSupplementary]

## Sheet: microarray analysis data
Table SII. Microarray analysis data.
	Raw Intensity												Annotations
probeID	[h1](raw)	[h2](raw)	[h3](raw)	[h4](raw)	[h5](raw)	[h6](raw)	[i1](raw)	[i2](raw)	[i3](raw)	[i4](raw)	[i5](raw)	[i6](raw)	circRNA	Alias	source	chrom	strand	txStart	txEnd	circRNA_type	best_transcript	GeneSymbol	Sequence
ASCRP3000001	22	19	19	20	20	55	30	21	21	71	84.5	80	hsa_circRNA_082501	hsa_circ_0082501	circBase	chr7	+	135258401	135333499	exonic	NM_015135	NUP205	AAAAAAACAACCAAAAAATGTTCAACAGCATGAGAAGGTTCAGAAAGCCAGTACAGAGGG
ASCRP3000002	99	80	71.5	104	83	241	96	101	78	286	271.5	263.5	hsa_circRNA_407247		25070500	chr9	+	131971147	131971515	sense overlapping	uc010myu.1	AK308944	AAAAAACGAAGAAAAAGAGACACCCAGCTCACCTCCAAGTTTGCCTGCAGGAGCCGGCTC
ASCRP3000003	36	35	35	28.5	24.5	50	80	42	42	87	92	77	hsa_circRNA_007418	hsa_circ_0007418	circBase	chr1	+	22816372	22818026	exonic	NM_014870	ZBTB40	AAAAAACTAGAAATGTGTTCAGAAATTAAAGGTCCACAGAAGGAGGGCCTGTCCTCCCAA
ASCRP3000004	23	28	25	32	38	66	31	39	47	184	193	171	hsa_circRNA_407121		25070500	chr8	-	125597327	125603476	exonic	NM_014751	MTSS1	AAAAAAGAAGTCCTCGGATACGCTGAAACTGCAGAAGAAAGCAAAAAAAGGTGGGACCAG
ASCRP3000005	24	23	26	23	22.5	63.5	38	51	39	234	241.5	157	hsa_circRNA_407087		25070500	chr8	-	71495398	71508556	exonic	NM_014294	TRAM1	AAAAAAGGAACAGGAAAACTACATCTCAGACCCAACTATCTTATGGAGGGCTTATCCCCA
ASCRP3000006	20	22	20	19.5	21.5	40	32	27.5	22	72.5	72	57	hsa_circRNA_061985	hsa_circ_0061985	circBase	chr21	-	46275124	46285362	exonic	NM_004339	PTTG1IP	AAAAAATATGCTTGTTCTCAGAACACAAACAAAACCTGTGAAGAGTGCCTGAAGAACGTC
ASCRP3000007	38	32	29	35	24	37	120.5	162	196	123	125	96	hsa_circRNA_404446		25070500	chr1	-	19670851	19684057	exonic	NM_004930	CAPZB	AAAAACAAAGGATATCGTCAATGGGCTGAGGTATTTTGAAGGTGGCGTCTCATCTGTCTA
ASCRP3000009	23	25	20.5	20	22	40	34	37	30	72	91	86	hsa_circRNA_401039		25242744	chr12	-	110376184	110377052	exonic	NM_014776	GIT2	AAAAACATACAGGAGCTCTTAAGAGCAGCCCAAGAAAATAAACATGACAGGCATCCAGGC
ASCRP3000010	36	33	29	36	37	39	47	34.5	53	73	76	69	hsa_circRNA_400114		25242744	chr1	-	8421822	8482867	exonic	NM_012102	RERE	AAAAACGCAGAAACGCTTCGTTAAGGGACTCAGGCAGTACGGGAAGAACTTCTTCAGAAT
ASCRP3000012	33	29	26	31	21	287	80	284.5	153	666	757	590	hsa_circRNA_000654	hsa_circ_0000654	circBase	chr15	+	93480747	93482948	exonic	NM_001271	CHD2	AAAAACGTTAGAGAAAAATGGAAACAGGAACCCTCAGAAGATGAACAGGAACAAGGCACC
ASCRP3000013	25	23.5	23	26	27	50	32	21.5	26	79	82	74	hsa_circRNA_104195	hsa_circ_0002198	circBase	chr6	+	136472297	136476896	exonic	NM_018945	PDE7B	AAAAACTAACCACCATCTTGCAAACCTATATCAGGAAACAGCCTGGTAACACTGTTGTGC
ASCRP3000014	27	25	21	23	25	41	34	39	39.5	86	123	99	hsa_circRNA_404754		25070500	chr10	-	61592282	61612460	exonic	NM_005436	CCDC6	AAAAACTGGAGAATGACACCATTTCTAAGCAACTTACATTAGAACAGCAAGCCAGGGCTG
ASCRP3000015	59	56	55	100	89	223.5	147	231	156.5	548	773.5	487	hsa_circRNA_103950	hsa_circ_0001534	circBase	chr5	-	137278563	137278905	exonic	NM_016603	FAM13B	AAAAACTGGCTCTGGATCTCCGATTGTCAAGTTCTCGAGCAGCTTCTATGGATCTCCATC
ASCRP3000016	30	26	20.5	25	26	114	38.5	65	63	154	303	222	hsa_circRNA_007390	hsa_circ_0007390	circBase	chr15	-	73854236	73866136	exonic	NM_012428	NPTN	AAAAACTTGCGCCAGAGAAACACAAATTAAGTACTGCTTACAATCCGCTCCTGACATCAC
ASCRP3000017	24	23.5	21	24	22	167	68.5	199.5	70	236	432	292	hsa_circRNA_008846	hsa_circ_0008846	circBase	chr6	-	18256591	18258636	exonic	NM_003472	DEK	AAAAAGAAGGAAGAAATGTTGAAAAAAAAAGAGTCTCATCGTGGAAGGCAAGAGGGAAAA
ASCRP3000018	78	172.5	215	286	247	76	293	890	313.5	159	306	187.5	hsa_circRNA_000542	hsa_circ_0000542	circBase	chr14	+	58785259	58796887	exonic	NM_002892	ARID4A	AAAAAGACAGAAGAAGAGGTGTGTTTGATGATGGTGATGAGCGAACATTGAGACGTACCT
ASCRP3000019	25	21.5	21	24	21	37	33	58	34	67	63	61	hsa_circRNA_404789		25070500	chr10	+	91478466	91486278	exonic	NM_016195	KIF20B	AAAAAGAGAGAAAATGGTTTCAACAGCATGTGCCTTTCCGGGAAAGTAAACTGACTCACT
ASCRP3000021	28	21	18	26	24	309	53	76	153	925	1554	1046	hsa_circRNA_102997	hsa_circ_0059490	circBase	chr20	-	16506736	16509085	exonic	NM_024704	KIF16B	AAAAAGCCCAGATTACGTTTCACAAGAAATGGGAAAAGGACTTGGAGGCCAAGTTCATTA
ASCRP3000022	29	23	19	31	35.5	54	36	58	44.5	123	258	172.5	hsa_circRNA_402543		25242744	chr20	+	25398740	25405963	exonic	NM_021067	GINS1	AAAAAGCCTATATATTGAAGTATGACCGCTTGCTTCGGATCAGAGCACTCAGATGGGAAT
ASCRP3000023	31.5	28	29	31	32	55	38	37	30	107	78	87	hsa_circRNA_404823		25070500	chr10	-	128973475	128975403	exonic	NM_001039762	FAM196A	AAAAAGGAGAGGCCCATCGGGAAGGAATTATTTTCCAGTACCACTCTCCATGGAATAAAA
ASCRP3000024	33	29	25	25	28	101	40	63	41	156	301	224	hsa_circRNA_103917	hsa_circ_0073435	circBase	chr5	+	95072592	95119667	exonic	NM_014899	RHOBTB3	AAAAAGGCCAAGGACATATTTGACAGTGATTGGTACACTTCTCGAAATCTAATTGGGGGC
ASCRP3000025	161	285	152.5	141.5	76	1230	369	342.5	139	955	612	638.5	hsa_circRNA_102887	hsa_circ_0057691	circBase	chr2	-	200233327	200246543	exonic	NM_015265	SATB2	AAAAAGTACAAGAAGATTAAAGGAATAATCAAGCTGGGAAGGTGGAACCCTCTCCCCCTC
ASCRP3000026	47	60.5	55	68	55.5	40.5	71	77	48	87	96.5	91.5	hsa_circRNA_405950		25070500	chr2	+	121036193	121038483	exonic	uc002tml.3	RALB	AAAAAGTAGAAGGTATTCTAGAGCTCTTCAGTGGGTCATCTGTGTGTCACAGCCTCAGAA
ASCRP3000027	29	27	23.5	25.5	27.5	85	30	23.5	25	88	69	79.5	hsa_circRNA_054947	hsa_circ_0054947	circBase	chr2	+	64113474	64118696	exonic	NM_006759	UGP2	AAAAATAAAGCAGTGAAGCAATAGGCGGGACACTCACTCAATATGAAGGCAAACTGAGAC
ASCRP3000028	36	57	40	27	27	36	58	65	73.5	57	52	54	hsa_circRNA_406825		25070500	chr6	+	109762831	109763131	intronic	ENST00000258052	SMPD2	AAAAATAGCTGATCAGAGCTGGAAGACAAGGGAGGGGAAGAAGGCTGGGTGTGAGAAGCC
ASCRP3000029	26	26	23	53	23	62	40	68	45.5	108	120	89	hsa_circRNA_031460	hsa_circ_0031460	circBase	chr14	-	31582309	31602881	exonic	NM_015382	HECTD1	AAAAATATTACAGCAGATTGAGGTCAACTGCAACTTGGCCTCTTGATCCACCAAAGGATG
ASCRP3000030	37	32	29	41	45.5	56	37	26	26.5	107	77	66	hsa_circRNA_407023		25070500	chr7	+	148582342	148582577	intergenic			AAAAATCCTTTATCAAGATGAGCACTGTTCACTTGCCGCCTCTGCAAAGTCCACCGCCGC
ASCRP3000031	42	35.5	45	61.5	52	204	51	109	54	432	366	271.5	hsa_circRNA_406859		25070500	chr6	-	135639656	135644462	exonic	NM_017651	AHI1	AAAAATCTCCAGCTCCTCAAAAGGTAGTGGCTCTTTATGACTACACAGCGAATCGATCAG
ASCRP3000032	32	29	29	51	46.5	70	41	32	47.5	202	210.5	188	hsa_circRNA_102776	hsa_circ_0055451	circBase	chr2	-	86088303	86090608	exonic	NM_003896	ST3GAL5	AAAAATGCATTATGTGGACCCTGACCATGTAAAGCAATGCCAAGTGAGTACACCTATGTG
ASCRP3000033	26	27	31	31	22	49.5	80	320	133	147	152	115	hsa_circRNA_100098	hsa_circ_0007822	circBase	chr1	+	23356961	23385660	exonic	NM_015013	KDM1A	AAAAATGCCCACTTTATGAAGCCAACGGACAAGCTGTAGAGTACAGAGAGATGGATGAAA
ASCRP3000034	28.5	41	46	30	21	32.5	46	39	26	62	58	59	hsa_circRNA_406086		25070500	chr20	+	18122851	18123563	sense overlapping	NM_020536	CSRP2BP	AAAAATGGATACCAGCCAAGGCTTCGTGACGGAGTTATCAGAGACATTGAGAGGCAAATT
ASCRP3000036	23.5	22	21	27	28	41.5	51	88	41	80	79.5	70	hsa_circRNA_104215	hsa_circ_0005753	circBase	chr6	+	149663820	149691235	exonic	NM_015093	TAB2	AAAAATTCCCTGAAGTACCTGAAGTTGTTGTATCCAGGTGCATGTTACAGGCTCCAGACC
ASCRP3000038	67.5	35	36	61	26	216	878.5	2253.5	1308	927	1837	1141	hsa_circRNA_092547	hsa_circ_0001445	circBase	chr4	+	144464661	144465125	exonic	NM_003601	SMARCA5	AAAACAAAAGGGAGGCTTGTGGATCAGAATCTGAACAAAATTGGGAAAGATGAAATGCTT
ASCRP3000040	57.5	66	79	72	71	73	81	65	52	142	102.5	86.5	hsa_circRNA_102799	hsa_circ_0002076	circBase	chr2	-	110321942	110350696	exonic	NM_144710	SEPT10	AAAACAAGCCAGTCAGCTCTTTCAGTCTCACATGGCAACGAAAACAACTTGTATGTCTTC
ASCRP3000041	34	22	20.5	31.5	23	138	166	402	243.5	452	747	446	hsa_circRNA_004103	hsa_circ_0004103	circBase	chr11	+	102233626	102239279	exonic	NM_001166	BIRC2	AAAACAAGCTGAAGAAATGGCATCAGGTGTGAGTTCTTGATACGAATGAAAGGCCAAGAG
ASCRP3000042	27	28	27	24	24	99	119.5	519	155.5	179	466	281.5	hsa_circRNA_000566	hsa_circ_0000566	circBase	chr14	+	97299803	97327072	exonic	NM_003384	VRK1	AAAACAATAACAAAGTGAAAATGCCTCGTGTAAAAGCAGCTCAAGCTGGAAGACAGAGCT
ASCRP3000044	29	114.5	361	93	64	60	115.5	706	82	185	280	174	hsa_circRNA_006759	hsa_circ_0006759	circBase	chr2	-	63711737	63798760	exonic	uc002sci.2	WDPCP	AAAACAGTCGGTGTGTGCTGAGCAAATGGAAGAACAAATATGTCTGTCAGAAAACCATGA
ASCRP3000045	24	23	20	21	20.5	33	27.5	23	24	62.5	64.5	59	hsa_circRNA_000052	hsa_circ_0000052	circBase	chr1	+	36367548	36367938	exonic	NM_012199	AGO1	AAAACAGTGTCGAGAAGAGGTGCTCAAATGAAGAATGCCAGCTACAACTTAGATCCCTAC
ASCRP3000047	24.5	30	24	23.5	26.5	67	55	146	111	131.5	248	165	hsa_circRNA_004767	hsa_circ_0004767	circBase	chr17	-	3969740	3976050	exonic	NM_015113	ZZEF1	AAAACATAGTTCAGAAGCTACTGAGGTGAACCCTGAGAGCCTGGAGTTAGGAAGTAACAT
ASCRP3000048	33.5	25	21	28	27.5	82	46	63	41	203	247.5	219	hsa_circRNA_101633	hsa_circ_0036629	circBase	chr15	+	85657103	85664245	exonic	NM_002605	PDE8A	AAAACATGGAGAGGTAATCAATATTATCAATGCTGCCCAGGAAAGTAGTCCCATGCCTGT
ASCRP3000049	27	21	22	23	22	53	38.5	44	41	90	143	105	hsa_circRNA_101915	hsa_circ_0041050	circBase	chr16	-	89849266	89849510	exonic	NM_000135	FANCA	AAAACATGGGACTCTACGAGGATTTGTCATCAGCTGGGGACATTACTGAGGTGCACATTC
ASCRP3000050	22	26	20	22	21.5	79	30	31	28	158	298	218	hsa_circRNA_405400		25070500	chr15	-	77657504	77696619	intronic	ENST00000567337	PEAK1	AAAACCAAAGGTATTCTGGAGAGGTGTATGAGAAGAAAACAGCAAAGCCAAGTTACACCA
ASCRP3000051	59	389	253	72	50	155	504.5	750	291	307	507.5	222.5	hsa_circRNA_102445	hsa_circ_0004552	circBase	chr19	+	11015626	11019883	exonic	NM_199141	CARM1	AAAACCACACCGACTTCAAGGACAAGATGAAGATGTGTGTGTCTTTAAGTGCTCAGTGTC
ASCRP3000053	39	31	27	40	38	93	37	25	34	142.5	127.5	90	hsa_circRNA_102323	hsa_circ_0047145	circBase	chr18	-	20932159	20953727	exonic	NM_032933	TMEM241	AAAACCTTCTGGCCCCAGGGCAGTGTGCAGCCTGGATTTTCTTTGCTAAGTGCCCTCCTC
ASCRP3000054	44	33	19	25	35	33.5	50	24	32	58	61	65	hsa_circRNA_015839	hsa_circ_0015839	circBase	chr1	+	200729966	200784772	exonic	NM_203459	CAMSAP2	AAAACTGAAAGAACATCACACAGTTGAAGCTCCAGGAGGTCAAAAGAAAATGTGCCAGAG
ASCRP3000055	32	21	20	30	28.5	65	30.5	20	24.5	88	99	99	hsa_circRNA_402980		25242744	chr3	+	141632493	141640905	exonic	NM_001679	ATP1B3	AAAACTGCATCATATACTTTAGAAGAACAGAAGAACCTCACAGTCTGTCCTGATGGAGCA
ASCRP3000056	48	35	29	51	53	121	43	49	47	228	378	223	hsa_circRNA_402979		25242744	chr3	+	141622461	141640905	exonic	NM_001679	ATP1B3	AAAACTGCATGTTTGATCTTGCTCTTCTACCTAGTTTTTTATGGGTTCCTGGCTGCACTC
ASCRP3000057	22	21	19	20	28	49	31	18	25	72	91.5	76	hsa_circRNA_068767	hsa_circ_0068767	circBase	chr3	+	197677806	197682721	exonic	NM_000996	RPL35A	AAAACTTACTACCTTAAGCCTGCTGGGAACGGGACTTCTAAAAGGAACTATGTCTGGAAG
ASCRP3000059	31	30	29	46	26	815	150.5	330	303	1037	2593	1785	hsa_circRNA_102820	hsa_circ_0056439	circBase	chr2	+	128944256	128945188	exonic	NM_020120	UGGT1	AAAAGAACCAAGCCGAGAAGGATCTGCCCAATAACATGATTCATCAGGTGCCAATTAAAT
ASCRP3000060	24	27	25	26	30	39	35	37.5	26	62	48.5	54	hsa_circRNA_405348		25070500	chr15	-	55731669	55742565	exonic	NM_130810	DYX1C1	AAAAGAAGAAGAAAAGAACCCAGAATGGTTGAAGGATAAAGGAAAGGAGAAATTCAGAAA
ASCRP3000061	97	64	60	135	114	283	89	82.5	74	517	408.5	407.5	hsa_circRNA_016363	hsa_circ_0016363	circBase	chr1	-	211836114	211843749	exonic	uc021pir.1	NEK2	AAAAGAATTCTTCAGTTTCCCTGTGCCTCCATTTACAGCTTTTAGCCAGAAAGAACTCGC
ASCRP3000062	61	46	49	71	80	46	116	85	142	85.5	107	95	hsa_circRNA_092482	hsa_circ_0001036	circBase	chr2	-	85554223	85554349	sense overlapping	NM_006464	TGOLN2	AAAAGACGTCCCTAACAAGTCGGGTTCGGAGGCGCAGACCACAAAAGATGTCCCTAATAA
ASCRP3000063	20	21	17.5	19	22	33	27	23	23	72	69.5	68	hsa_circRNA_000572	hsa_circ_0000572	circBase	chr14	-	104219336	104220581	exonic	NM_015316	PPP1R13B	AAAAGACTGTACCAAGAACTACAGGAACAGCGTTTACATTTTCTAAAGCAACAGGAGCGC
ASCRP3000064	13679	21238.5	16192	22116	14629	13258	28071	50986	18651	8571	14006	10748.5	hsa_circRNA_087119	hsa_circ_0087119	circBase	chr9	+	68409997	68413434	exonic	uc004aew.1	AK308561	AAAAGAGAGGCCGCCGCCTCTCTCTCCCTCTGGTTCTATTTCTCCATCCCTCTCTCCTTT
ASCRP3000065	43	39	32	63.5	38	2133.5	118	255	325.5	900.5	6314.5	3183	hsa_circRNA_068784	hsa_circ_0068784	circBase	chr4	+	337570	338219	exonic	NM_003441	ZNF141	AAAAGAGCCCTACAATGTGAAGATACATAAGATCGTAGCCAGACCCCCAGGAACTCTTAA
ASCRP3000066	23	24	22	21	21	667	51	97	101.5	559.5	1190	801	hsa_circRNA_088439	hsa_circ_0088439	circBase	chr9	-	126212971	126641300	exonic	NM_020946	DENND1A	AAAAGAGGTGAAAAACCGCTTGAAGCAAAAGGCAGAATCCAGAGACCACATTTGAAGTAT
ASCRP3000067	30	26	20	25	25	106	31	30	34	157	236.5	134	hsa_circRNA_105045	hsa_circ_0092163	circBase	chrX	+	154317537	154319114	exonic	NM_024332	BRCC3	AAAAGAGTTCAGAATGTTCGCACACAAGCCATGTACCAGATGATGGATCAAGGCTTTGTA
ASCRP3000068	27	32.5	28	23	24.5	33	48	76	46	56	56.5	57	hsa_circRNA_060539	hsa_circ_0060539	circBase	chr20	-	43953928	43956055	exonic	NM_002999	SDC4	AAAAGATAATAAAACCTGGTACTTTCTAACTCTGATTGTGGGTGGCATCGTGGGCATCCT
ASCRP3000069	440.5	910	659	1215	922	1262	1833	2675	771	1593	1741	957	hsa_circRNA_000829	hsa_circ_0000829	circBase	chr18	-	12506475	12535600	exonic	NM_020148	SPIRE1	AAAAGATACACCTTGCGAAAAGTGATGTTGTGTGCTGCTCATCTCCCTACTGAATCAGAT
ASCRP3000070	25	26	26	26	26	49	29	30	26	75	68.5	60	hsa_circRNA_405678		25070500	chr18	-	36782074	36788753	sense overlapping	NR_024391	LINC00669	AAAAGATGGAGAAGATTATTTCTGCTGGCCTCCAGGAAGCAGGGGGTACAAGCAATTTTC
ASCRP3000071	359	204	171	136	128	31820	371.5	600	939	32963.5	49187	32659	hsa_circRNA_405869		25070500	chr2	+	44436353	44436466	intronic	ENST00000459690	PPM1B	AAAAGATTCAGAGTTGGATAAGCACTTGGAATCACGGGTTGAAGTCGAGATAACATGAGT
ASCRP3000072	18	21	20	20	21	38	28	50	22	60	61	58.5	hsa_circRNA_407150		25070500	chr9	-	5968018	5988545	exonic	NM_001017969	KIAA2026	AAAAGCAAAACACAAGAAGCACAAATCTGGCACTTGAGAGAAAAGACAACGATAGCAGTT
ASCRP3000073	53	37	39	63	65	37.5	49	41	47	84	69	61	hsa_circRNA_402810		25242744	chr3	-	31725125	31774903	exonic	NM_017784	OSBPL10	AAAAGCAAGTTCATGGGCATGTCCGTGGGGGTCTCTATGATAGGGGAAGAAAACATCCTG
ASCRP3000074	97	35.5	27	75	27	21534.5	403.5	982	1380	22014	70495	44760	hsa_circRNA_068655	hsa_circ_0068655	circBase	chr3	-	196129822	196134264	exonic	NM_015562	UBXN7	AAAAGCAGGAAATACTGGTGGAACCAGAACCATTATTTGGTGGTGCAAGTGAAAGTGTAG
ASCRP3000075	21.5	24.5	22	20	24	44	30	22	29	94	64	59	hsa_circRNA_400196		25242744	chr1	+	36358157	36360870	exonic	NM_012199	AGO1	AAAAGCATACCTACCTTCCCCTAGAGGGAAGTGGTGGAATACATGGTCCAGCATTTCAAG
ASCRP3000076	23	23	20.5	23	25	118	81	193.5	103	213	299.5	197	hsa_circRNA_006131	hsa_circ_0006131	circBase	chr6	-	86328535	86329135	exonic	NM_006372	SYNCRIP	AAAAGCTCAGAGGCAAGCAGCAAAAAATCAAATGTAAAAGTGCTGTTTGTACGCAACCTT
ASCRP3000077	30.5	39	34	27	28	67	40	30	41	121	109	86.5	hsa_circRNA_404245		25242744	chr9	+	114289547	114296633	exonic	NM_133464	ZNF483	AAAAGCTCCCGACTAGTTTCTGCAGGACTGTAAACTGGATTCCTGGAACCTTTGATATTC
ASCRP3000078	37	31.5	33	57	72	58.5	49	63.5	34.5	143.5	143	92.5	hsa_circRNA_006116	hsa_circ_0006116	circBase	chr7	-	98718265	98718826	exonic	ENST00000472627	SMURF1	AAAAGCTGCTGCTGAGTGGGGCTTCCAGAATTCAAGGTCTAAATTGACATATTTGGGAAG
ASCRP3000079	26	26	22	27	19	66	55	115	80	125	208	133	hsa_circRNA_406648		25070500	chr5	+	112870001	112874878	exonic	NM_022828	YTHDC2	AAAAGGAAAAACAGCAAGGGTTTCTCCAAAGACACTTCTGACATTTTGTACTAATGGGGT
ASCRP3000080	27	24	20.5	22	24	62	66	266.5	197	179	261	207	hsa_circRNA_001520	hsa_circ_0001520	circBase	chr5	+	112321531	112339774	exonic	NM_152624	DCP2	AAAAGGAAAGCCGATTTATTTTGCATATTCCCAGCGAGGAAAGAGACAATGCAATCCGAG
ASCRP3000081	31	30	27	40	40	178	50	85	63	280	435	306	hsa_circRNA_103519	hsa_circ_0068075	circBase	chr3	+	179045348	179046139	exonic	NM_016331	ZNF639	AAAAGGAAGACTCTACACCCTTCTCGTTATTCAGGCATTTTTTACTGTCTACAGAAACTT
ASCRP3000082	46	51.5	63	38.5	36	101	36	38	60.5	185	197	167	hsa_circRNA_103384	hsa_circ_0065898	circBase	chr3	-	51454240	51456330	exonic	NM_014703	VPRBP	AAAAGGAGACATTGCCCACATTCCGTCCTATTTCAGTGTTCCGGGAAGCCAATGAAGATG
ASCRP3000083	31	23	23	30	25.5	261	104	730	282	1016.5	2633	1632	hsa_circRNA_102642	hsa_circ_0003828	circBase	chr2	-	24046127	24046439	exonic	NM_017552	ATAD2B	AAAAGTGTTTCCTCATGCTGAAATTAGCCAGAGTGACAAAAAAGAAGGCTACTGTGGAGC
ASCRP3000084	84.5	83	52	78	93	193	80	190	150	197.5	170.5	153	hsa_circRNA_405561		25070500	chr17	+	29183972	29192818	exonic	NM_024857	ATAD5	AAAAGTTACATAGGGTGTTGTTTGTGGCATTTGAAACCACCCTCTTGTCCTCTCTTAACT
ASCRP3000086	54	39	31	34	32	62	37	27	34.5	101	86	79.5	hsa_circRNA_406838		25070500	chr6	+	125328677	125329118	intronic	ENST00000359704	RNF217	AAAAGTTGTAAAAATATGCTATAATAAAATTTATCCACTGCTCCTGGCTGACTTTGAGCA
ASCRP3000087	27	30	32	26	30	40	33.5	46	32.5	62.5	50	51.5	hsa_circRNA_405727		25070500	chr19	+	8539883	8540669	intronic	ENST00000325495	HNRNPM	AAAAGTTTCAGAAATCTGGCTTGGTAAAATGTTACTCAGAGCAGATTACCACCGTGCTCG
ASCRP3000088	27	22	22	25	25	74	34	28	26	81	113.5	98.5	hsa_circRNA_031775	hsa_circ_0031775	circBase	chr14	-	50050289	50052767	exonic	NM_001032	RPS29	AAAATAAACATTTGAAAAAACCCTTCATCGTGTCTGTTCAAACCGGCACGGTCTGATCCG
ASCRP3000090	19	21	19	21.5	20	49	29	26	25	178.5	180	166	hsa_circRNA_403034		25242744	chr3	-	182923663	182925611	exonic	NM_015078	MCF2L2	AAAATAATATCAAAGGACGATATTGGAAAACTAGGCAAGCTGTTGCTGCACGGCCCTTTC
ASCRP3000091	27	26	21	22	23	57	36	20	30	98.5	126.5	104	hsa_circRNA_004520	hsa_circ_0004520	circBase	chr9	-	136790964	136804341	sense overlapping	NM_003371	VAV2	AAAATACCAAAGTTTTCTGTGTTTGAAGAACATACGCACCTTCCTGAAAGTCTGCCACGA
ASCRP3000092	42	70	70	41	33	36	74	112.5	67.5	81.5	68	60	hsa_circRNA_003986	hsa_circ_0003986	circBase	chr1	+	36282482	36292436	exonic	NM_017629	AGO4	AAAATACCGAGTTTGTAATGTGACTAGACGGCCAGCCAGTCATCAAACGACCTCCGGCTA
ASCRP3000093	25	24	19	20	22	39	30	31	24	68	81	71	hsa_circRNA_100137	hsa_circ_0011264	circBase	chr1	-	31740717	31764853	exonic	NM_004814	SNRNP40	AAAATAGCAGCTGGCTCAGCCGACAGTACTGTGGAATGTCTATGGTGACTGTGATAACTA
ASCRP3000094	35	33	33	25	22	39	37	25	32	64	54	54	hsa_circRNA_101014	hsa_circ_0008932	circBase	chr12	-	12332743	12340053	exonic	NM_002336	LRP6	AAAATATACTGGGGAGATGCCAAAACAGACAAGATTGAGGCAGGCAGTGGTTAAAGGTTC
ASCRP3000095	21	23	20	24	24	55	31	31	40	215.5	320.5	255	hsa_circRNA_102356	hsa_circ_0047552	circBase	chr18	-	43568667	43573669	exonic	NM_024430	PSTPIP2	AAAATCAATGGCATTTGAGGCTCAAGAATGTGAACGAATAAACTTCTTCCGGAATGCATT
ASCRP3000096	22	20	19	23	19	32	31.5	28	27	76	66.5	57.5	hsa_circRNA_011933	hsa_circ_0011933	circBase	chr1	+	41466700	41467926	exonic	NM_001905	CTPS1	AAAATCCAAGCAATTGCCTGGGCTCGGAATCAGAAAAAGCCTTTTTTGGTACATAGATTC
ASCRP3000097	43	29	27	55	38.5	210	50	51	80.5	235.5	747	448	hsa_circRNA_403832		25242744	chr7	-	72178578	72209578	exonic	NM_001145440	TYW1B	AAAATCTCCAGCTTCCTGGTCACAAATGCACAATTTCCTGCGGAAATCAGTCGATGCTCC
ASCRP3000098	22	22	21	21	20	32	33	26	24	66	61	57	hsa_circRNA_000546	hsa_circ_0000546	circBase	chr14	-	68234420	68236447	exonic	NM_015346	ZFYVE26	AAAATGAGCTGGTGCGGAGTGAATTTTACTATGAGCAGTTTAACAGGCGTCATCATTGTC
ASCRP3000099	31	33	28	25	25	55	36.5	80	38	80	81	68	hsa_circRNA_047135	hsa_circ_0047135	circBase	chr18	+	20570899	20576425	exonic	NM_002894	RBBP8	AAAATGGATGTTACTGTAATAGATACAAAGGAAACTCAAGGTCCCATGAGCCCCCTTGGT
ASCRP3000101	27.5	36	35	31	25	40.5	88	468	196	82	127.5	102	hsa_circRNA_104979	hsa_circ_0007685	circBase	chrX	+	10031484	10035530	exonic	NM_015691	WWC3	AAAATGTGTGAGGATGACAGCCGCTCGTACGCCAGCTGATAACAAAGCCATTGACCTTTG
ASCRP3000102	28	30	27.5	25	23	171.5	102.5	226	170	342	605.5	419	hsa_circRNA_006063	hsa_circ_0006063	circBase	chr10	+	26789747	26792203	exonic	NM_019043	APBB1IP	AAAATTAAGCTGGCGCTGGAAAAACTGAAGGAGGCCAAGGTTAAGAAGAGTCCTTAAATG
ASCRP3000103	23	26	19	35	31	55.5	42	55	38	121	195	145	hsa_circRNA_104496	hsa_circ_0082440	circBase	chr7	+	132990630	133002144	exonic	NM_021807	EXOC4	AAAATTCCTTGATACCTCTCACTATTCTACTGCTGGAAGCTCAAGTGGTGTCAGCAGTTG
ASCRP3000104	23.5	23	19	24	31	35	46.5	41	58	77	93	62.5	hsa_circRNA_101080	hsa_circ_0008085	circBase	chr12	-	56742312	56743420	exonic	NM_005419	STAT2	AAAATTCTGGAGTTGGTACATGACCACCTGAAGGATCTCTGGAATGATGGACTCTGGTGG
ASCRP3000105	26	22	21	27	35	46	34	38	33	75	76	78	hsa_circRNA_008091	hsa_circ_0008091	circBase	chr2	-	207003208	207007555	exonic	NM_005006	NDUFS1	AAAATTCTTCAAGACATTGCTTCGGGAAGCCATCCATTTAGCCAGTTGCAGAGTTTTCAA
ASCRP3000106	1736	4908	2349.5	2249	367	13401	1785	7682	1049	7064	9695	7169	hsa_circRNA_026134	hsa_circ_0026134	circBase	chr12	+	49658864	49667113	exonic	uc001rtt.1	TUBA1C	AAAATTGAAGTTTCCATTTACTACTTCTCCCCCGGACTCCTTGGTAGTCTGTTAGTGGGA
ASCRP3000107	26	33	23	30	33	97	41	60.5	40	135	238	167.5	hsa_circRNA_404086		25242744	chr8	-	103850971	103870378	exonic	NM_015878	AZIN1	AAAATTGCACGTAATCACCCAAATGCCAAGGCGAACTTTCTGACCAAGTATACAACTACC
ASCRP3000108	23	21	21	27	25.5	49	36	33	34	125	201	152	hsa_circRNA_104750	hsa_circ_0008678	circBase	chr9	+	20923658	20933102	exonic	NM_017794	FOCAD	AAAATTGCTGCTTTGACACTAGTCTTGAATACAAGGAGAGTCCGGTAGTGAAAGGCAATG
ASCRP3000109	73	62.5	55	86.5	70.5	55	105	106.5	89	114	105	89	hsa_circRNA_102771	hsa_circ_0055377	circBase	chr2	+	80772106	80783018	exonic	NM_004389	CTNNA2	AAAATTGCTTTCTGAAACAGGTTGCCAATTTGGCCTGTTCCATCTCCAACAATGAAGAAG
ASCRP3000110	50	41	23	32	27	94	51	55	54	179	172.5	142	hsa_circRNA_404987		25070500	chr12	-	29492783	29494151	sense overlapping	NM_016570	ERGIC2	AAACAAAATTCCAGGTTCCTTTTGAGGATGGCCACACAGACAACCACTTACCTCTTTTAG
ASCRP3000112	32	86	62.5	30.5	34	81	131	192	103	228	430	315	hsa_circRNA_004561	hsa_circ_0004561	circBase	chr8	-	93929156	93941802	intronic	ENST00000517540	TRIQK	AAACAAATTGGCAGTATAAATTTAATGTGTTGTTTTCAAGTGTGTCATGTGTCCAGATGC
ASCRP3000113	38	24	22.5	41	27	349	124	421	235.5	711	1423	859	hsa_circRNA_104876	hsa_circ_0088062	circBase	chr9	-	114911523	114919893	exonic	NM_022486	SUSD1	AAACAACAACAAGACATTCATTCCCAACGATGGCACCTTTTGTACAGGTTTAGACGTCTG
ASCRP3000114	24	22	19.5	19	20	32.5	29.5	35	31.5	65	65	67	hsa_circRNA_103727	hsa_circ_0008144	circBase	chr4	-	120460114	120488299	exonic	NM_001083	PDE5A	AAACAAGAGAGCTACAGTCGTTAGCGGTTGTTGGTGTAGCCCAGGCCATCAACAAGAAAT
ASCRP3000115	25	26	26	33	29	51	28	26	26	72.5	73	69	hsa_circRNA_000980	hsa_circ_0000980	circBase	chr2	+	19538077	19538212	antisense	ENST00000449124	AC092594.1	AAACAAGCATCATCCTCTTCTGAAGAAAGACAAGCATGAGGTGCTCCAACATTTTTCAGG
ASCRP3000116	40.5	55	66	46.5	44	44	58	54.5	28	81	58	50	hsa_circRNA_102798	hsa_circ_0009020	circBase	chr2	-	110321942	110323436	exonic	NM_144710	SEPT10	AAACAAGCCAGTCAGGGACAGTTGCCGTTTGCTGTTGTGGGAAGTATGGATGAGGTAAAA
ASCRP3000117	231	451	348	486	351	3528	493	970	142	4175.5	3209	3305.5	hsa_circRNA_407330		25070500	chrX	-	129799616	129813722	exonic	NM_006375	ENOX2	AAACAAGCTGAGATCTCCCACCTCCTGCAACCCGAGAAAGACCACCAGGATGCAAAACAG
ASCRP3000118	31	36	34.5	49	49	46.5	38	30	32	74	81	68	hsa_circRNA_103352	hsa_circ_0001292	circBase	chr3	-	47476497	47484581	exonic	NM_012235	SCAP	AAACAAGGAGAGCCTACTGAGCAGCCTGAGTGGGTACCTGCACATGTTGTTCTTTGTCAG
ASCRP3000120	28	28	24.5	23	28	35	36	33.5	27.5	55	53	54	hsa_circRNA_101466	hsa_circ_0005387	circBase	chr15	-	28505922	28508315	exonic	NM_004667	HERC2	AAACACATAGTGGGAATTGCCTGTGGGCCTGCCCAGGGCAAGTGTGGTCTTGGGGAGATG
ASCRP3000121	26	24	21	19	21	52	37	23	34	114	123	123.5	hsa_circRNA_104385	hsa_circ_0006365	circBase	chr7	+	65751497	65751696	exonic	NM_003596	TPST1	AAACACTCGAAGGAGTGGAGAGATCTACAGACCAAGTAATCAAGCCAGTCAATGTAGGAG
ASCRP3000122	128	168	153	197	142	2860.5	240	289	103	1885	1719	1356	hsa_circRNA_404317		25242744	chrX	-	8553307	8565297	exonic	NM_000216	KAL1	AAACACTTCCGTTCTTCCAAAGCCTCTCTTCCCCAAGAAGAGCTACGAATGCTTGACCAG
ASCRP3000123	47.5	39	19.5	26.5	23	38	43	77	60.5	90	81	69	hsa_circRNA_103433	hsa_circ_0005332	circBase	chr3	-	114069120	114070725	exonic	NM_015642	ZBTB20	AAACAGAACTACGTCAAGCACATGTTCGTACACACAGGTGACATCAGTTGCAAGGGGATG
ASCRP3000124	24	25	22	24	23	53	35	36	32	75	103	78	hsa_circRNA_007074	hsa_circ_0007074	circBase	chr1	-	54348615	54348949	exonic	ENST00000465897	YIPF1	AAACAGACCATTACTTTCCAATTTGGCAATGCAGCCACTTCTCTGACAGCAAACCCAGAT
ASCRP3000125	44	254	301	83	65	77.5	276	513	132	560	289.5	232	hsa_circRNA_066869	hsa_circ_0066869	circBase	chr3	-	119176864	119182471	sense overlapping	NM_018266	TMEM39A	AAACAGTGTGGTGGTATCCTTACAATCATCCTGCTTCTTGTACATCACTGACGTCTGCTC
ASCRP3000126	41	47	38	65	58.5	214	70	58.5	42	246.5	226	170	hsa_circRNA_101140	hsa_circ_0002628	circBase	chr12	+	110778463	110780253	exonic	NM_001681	ATP2A2	AAACAGTTCATCCGCTACCTCATCTCGTCCAACGTCGGGGAAGTTGTCTGACCAATCTGA
ASCRP3000129	55	55.5	58	65	58	138	120	524.5	201	358	418	293.5	hsa_circRNA_407303		25070500	chrX	+	77264598	77275895	exonic	NM_000052	ATP7A	AAACATCAAAGGTGAGGGGAATGACGTGTGCCTCCTGCGTACATAAAATAGAGTCTAGTC
ASCRP3000130	36.5	23	19	27	29.5	35	28	26	37	87	92	83	hsa_circRNA_101293	hsa_circ_0030764	circBase	chr13	+	100953713	101101559	exonic	NM_000282	PCCA	AAACATGAGCATTCAGTTTCTTGGTACAGTGGTTGAGCATCCTGTCACAGAATGCATTAC
ASCRP3000131	26.5	25.5	24.5	31	28	53	28	22	24	76	66	69	hsa_circRNA_100555	hsa_circ_0017803	circBase	chr10	-	13364834	13387028	exonic	NM_012247	SEPHS1	AAACATGTTCGGCCTCATGCACGGGACCTGCCCGGAGACTTCAGGTGGATCCATAAAGAA
ASCRP3000132	55.5	47	38.5	43	36.5	80	43	29	34	142	135	137	hsa_circRNA_062996	hsa_circ_0062996	circBase	chr22	-	33260901	33265112	exonic	NM_003490	SYN3	AAACATTTTTCCCCAACCATAAGCCAATGCAGATCCTTCAAGCCAGACTTCATCCTGGTC
ASCRP3000133	49.5	46	33	38	29	69	57	39	38.5	108	97	83	hsa_circRNA_003063	hsa_circ_0003063	circBase	chr18	+	8076452	8114825	exonic	NM_002845	PTPRM	AAACCAAAATAGACTGTGTCCAAGTGGCCACAAAAGTCCCAGGTGCTGTTCCCACTGAAT
ASCRP3000134	25	26	26	32	34	50.5	33	24	28	75.5	74.5	62.5	hsa_circRNA_075881	hsa_circ_0075881	circBase	chr6	+	25605039	25606501	exonic	NM_017640	LRRC16A	AAACCAAGAACCGCCTCACGGCCTGAAGCTTGGGAATGATGCCGTATCCCAGGATTCTTC
ASCRP3000135	64	66.5	80	59	54	195.5	54	44.5	59.5	231	335	245	hsa_circRNA_013959	hsa_circ_0013959	circBase	chr1	-	147131761	147131890	exonic	NM_016361	ACP6	AAACCATATTCTCCTTACGACTCTCAATACCATGAGACCACCCTGAAGGTAGAGTGGAAC
ASCRP3000136	30	26	22	32.5	34.5	65.5	35	29	34.5	93	133	99.5	hsa_circRNA_405639		25070500	chr17	+	78593426	78617610	sense overlapping	NM_020761	RPTOR	AAACCATCGGTGCAAATTTACAGAAGCAGTACGAGAACTGGCAGCCAAGGCTCATTTGGT
ASCRP3000137	21.5	19	18	25	27	34.5	28.5	41	22	67	82.5	73	hsa_circRNA_026023	hsa_circ_0026023	circBase	chr12	-	48457492	48495299	exonic	NR_051991	SENP1	AAACCATCTGAATTGGCTCAATGATGAGGACTTTGTATCTTTGCTAAAGTCAGTGATGTG
ASCRP3000138	24	21	21	24	20	400	40	54	51	1104.5	2477.5	1504.5	hsa_circRNA_000078	hsa_circ_0000078	circBase	chr1	+	62907865	62911100	exonic	NM_003368	USP1	AAACCCATAAACAAAGGTATTATATTTTTGTCCCGGTTTTAAATCTGGAGTAAAGCACTT
ASCRP3000139	288	338	214.5	263	189	879.5	551.5	936	338	944.5	1103	644	hsa_circRNA_000968	hsa_circ_0000968	circBase	chr19	+	58774155	58774397	intronic	ENST00000595981	ZNF544	AAACCCTATGAATGTGACCATTGCGAGAAAGCCTTTAGCCAACGGTCTCCCCTCATCATG
ASCRP3000140	38	34.5	29	32	32	88	50	204	94	256	245	207	hsa_circRNA_404701		25070500	chr1	-	247319707	247323115	sense overlapping	NM_003431	ZNF124	AAACCCTATGACTATAAGCAATAAGAACTCGGTTGCCTTTGAGGATGTGGCTGTGAACTT
ASCRP3000142	35	37	38	27	29	221	33	38	44	285	291	249	hsa_circRNA_018168	hsa_circ_0018168	circBase	chr10	-	34558584	34573173	exonic	NM_019619	PARD3	AAACCCTCACCTGTAGACAGGTTTGGCAAACATCGAAAAGATGACAAGATTGAGAAAACG
ASCRP3000143	25	24	23	27.5	25	254.5	75	202	143	553	950	581	hsa_circRNA_103167	hsa_circ_0008252	circBase	chr22	+	21965145	21965332	exonic	NM_003347	UBE2L3	AAACCGACCAAGGACAACCCTCCATATGATAAGGGAGCCTTCAGAATCGAAATCAACTTT
ASCRP3000144	20	24	20	19	19	36	31	41	35.5	76	94.5	84	hsa_circRNA_400993		25242744	chr12	-	72013094	72014095	exonic	NM_144982	ZFC3H1	AAACCGGGGTTTGAGAAGTATAATAACTTGGATCTGTTTCGATGCAGTGAAAGCTTGCAC
ASCRP3000145	27	21	22	27	25	72	44	98	55	315	358.5	268	hsa_circRNA_104659	hsa_circ_0085045	circBase	chr8	-	99718694	99761618	exonic	NM_006281	STK3	AAACCTCCTTATGCTGATATACATCCAATGAGGCCCATATGTTGTAAAGTACTATGGCAG
ASCRP3000146	28	24	23	24	22	651	88.5	210.5	189	1664	2131	1687	hsa_circRNA_406619		25070500	chr5	+	68487621	68492936	exonic	NM_022909	CENPH	AAACCTGGAGAAAATTAGCAGACAGTCTAGGCTGAGAGCACAGACAAAACAACAACTCTT
ASCRP3000147	27	28	26	27	26	44	33	128	47	89	125	100.5	hsa_circRNA_102878	hsa_circ_0057551	circBase	chr2	+	196544755	196548630	exonic	NM_020342	SLC39A10	AAACCTGGTTCCTGAAGATGAGGCAAATATAGGGGCATCAGGAAAAATAGAAATGAAGGT
ASCRP3000148	39.5	26	24	72.5	54	34.5	46.5	36	43	73	55	57	hsa_circRNA_104348	hsa_circ_0079891	circBase	chr7	-	37250990	37382367	exonic	NM_014800	ELMO1	AAACGCAAGTCCATGTACACGCGAGATTATAAGAAGCTTGGGTTCATTGTATAGACACGT
ASCRP3000149	75	70	57.5	46	30	62.5	518	3045.5	1392	171	268.5	200	hsa_circRNA_101996	hsa_circ_0000745	circBase	chr17	+	20107645	20109225	exonic	NM_152904	SPECC1	AAACGGTGAAATTAAACATGTTTCCAGTCTGCTGGCCAAGGGGCCTTTACAACAACTAAA
ASCRP3000150	52	52	49.5	47	43	214	81	102	110	191	257	220	hsa_circRNA_102473	hsa_circ_0003215	circBase	chr19	+	17267718	17270294	exonic	NM_004145	MYO9B	AAACGGTGACCGTCAACGACAAGCTTATCCTTCCCTACAGCCTCAGCGAGGATTTTTGCC
ASCRP3000151	23	22	20	25	20	199.5	77	349	178.5	752.5	1264	869	hsa_circRNA_100117	hsa_circ_0007895	circBase	chr1	-	28362054	28384605	exonic	NM_001990	EYA3	AAACGTATGGACTACCTCCTTTTGATTGTGAAAACTGCTGAGAGAGACTTGCAATCCAGT
ASCRP3000152	57	25	22.5	55	52	47	51	53	66	95	122	105.5	hsa_circRNA_011153	hsa_circ_0011153	circBase	chr1	+	28887144	28887910	exonic	NM_017846	TRNAU1AP	AAACGTTTTAAACTGAACTATGCCACTTACGGGAAACAACCAGATAACAGGATCCCAGCT
ASCRP3000153	23	23	19	20	22	53	78	225	173	106	169	127.5	hsa_circRNA_100865	hsa_circ_0002038	circBase	chr11	+	68334481	68343511	exonic	NM_001164160	PPP6R3	AAACTAACAAGAGGAACACGGTAGATCTAAAAAGTGTGATGAAGACCACATGGGGTGTGC
ASCRP3000154	19	21.5	19	27	22	33	30	26	32	190	86	116.5	hsa_circRNA_103745	hsa_circ_0071036	circBase	chr4	-	143324090	143326477	exonic	NM_003866	INPP4B	AAACTAACAGTCTATGATGTCAAGGATAAGTCTCATGACACCCATGCAAGGATCTCGTGG
ASCRP3000155	28.5	26	23	27	25	54	32	23	25	82	85	73.5	hsa_circRNA_104194	hsa_circ_0004712	circBase	chr6	+	136468488	136476896	exonic	NM_018945	PDE7B	AAACTAACCACCATCTTGCAAACCTATATCAGGTACAACATACTCAGGGGAGATTGGCAC
ASCRP3000156	31.5	27	23	30.5	33	36	168	602	232	90	98	75	hsa_circRNA_101224	hsa_circ_0029614	circBase	chr13	-	20304378	20356931	exonic	NM_001042414	PSPC1	AAACTACATGGAAAATGCCTGTATCCGGTGTCCGAGGCGAACTCAGTAAGATGATGTTAA
ASCRP3000158	25	25	18	29.5	20	155	150	329.5	155	517.5	1375	899	hsa_circRNA_100885	hsa_circ_0004596	circBase	chr11	-	73418464	73429935	exonic	NM_002869	RAB6A	AAACTAGTGCAAAAGCTGGATACAATGTAAAGCAGATCAGGCTTCAGCTGTGGGATACTG
ASCRP3000161	25	27	23	29.5	32	45	31	61	50	93	124.5	88.5	hsa_circRNA_087659	hsa_circ_0087659	circBase	chr9	+	100109595	100112837	exonic	NM_020893	CCDC180	AAACTCCGCTACTCAAATATTGAGTTCATCAAACACTGCAGACTTCGAGCTGGCTTCTTC
ASCRP3000162	32	30	28	67	63.5	80	43	41	34	148.5	134	123	hsa_circRNA_400732		25242744	chr11	+	32987845	32995095	exonic	NM_001076786	QSER1	AAACTCTAAGGACTTCTAAAACAACCACCAAATCTGCACAAAATTTGAACCTCCCGCTCC
ASCRP3000163	25	22	20	25	23	35	30	33	23	76	62	54	hsa_circRNA_103432	hsa_circ_0006163	circBase	chr3	-	113207791	113225452	exonic	NM_144718	SPICE1	AAACTCTCAGTCTAACACGAATACAGACAGATGTCATTTGTCAGAGTGAACCGCTGTGGT
ASCRP3000164	25.5	28	23	30	26	66	46	37	25	107	104	100.5	hsa_circRNA_403821		25242744	chr7	+	65220766	65221561	exonic	NR_003110	CCT6P1	AAACTGATACAAGGGCCTTCATCCCAGAATAATCACTGAAGGATTTGAAGCTGTGAAGGA
ASCRP3000165	26	20	20	26	28	31.5	31.5	44	27	61	54.5	54.5	hsa_circRNA_401846		25242744	chr17	-	58257905	58263012	exonic	NM_032582	USP32	AAACTGCAAGTGGTACTGTTACAATGACAGCAGCTGTAAGGTTGTAGATGAGCATGAGAG
ASCRP3000166	26	22	21	28.5	22	136	40	87	52	159	299	200	hsa_circRNA_102078	hsa_circ_0043893	circBase	chr17	-	40858024	40860101	exonic	NM_001991	EZH1	AAACTGCAGCATCCAGCGTGGACTTAAGAAGATAACTCTTCCACACAAGTGTACAACTAC
ASCRP3000167	49.5	32	34.5	45	52	345	228.5	1354.5	459.5	470	597	526	hsa_circRNA_103556	hsa_circ_0068629	circBase	chr3	-	195800800	195802231	exonic	NM_003234	TFRC	AAACTGGACAGCACAGACTTCACCGGCACCATCAATTTGGTGGAGAACCATTGTCATATA
ASCRP3000168	34	36	29	33	34	79	36.5	42	26.5	97	84	71	hsa_circRNA_102324	hsa_circ_0047151	circBase	chr18	-	21001330	21010641	exonic	NM_032933	TMEM241	AAACTGGGCTGGGTAGAGATCAACAGCAGTTCAAGTATGTGCTGTCTGTCTTGAAATTTA
ASCRP3000169	25	26	24	25	33	41	31	26	26	60	57	59	hsa_circRNA_001196	hsa_circ_0001780	circBase	chr8	+	17796781	17799020	intronic	ENST00000518930	PCM1	AAACTTAAAAGACTAAATATACTGCTGCTTGGAGGGGGATGGGGATTGGAAGGAAAGTGA
ASCRP3000171	40	38.5	42	29	23	109.5	73.5	72	68	298.5	437	312	hsa_circRNA_001747	hsa_circ_0000246	circBase	chr10	+	74468040	74475660	exonic	uc009xqp.1	MCU	AAACTTGAACATTCGCAGGGAGTGGAGGAAGAGGTGAAGATGTGGAAAGCCCAGAGAGTT
ASCRP3000172	20.5	21	18	18	20	44.5	43	144	70	107	131	96	hsa_circRNA_103314	hsa_circ_0064690	circBase	chr3	+	32745359	32750312	exonic	NM_015442	CNOT10	AAACTTTATCAGTTCATAGAGCCTTTTGATCAGGGAGCAGAGAAACATGAAGGCACAGGT
ASCRP3000173	32	26	22	27.5	29	122	43	35	25	120.5	137	119	hsa_circRNA_046753	hsa_circ_0046753	circBase	chr18	+	3252272	3256234	exonic	uc002kls.3	MYL12A	AAACTTTATGATAAAATAGCTGCTGAGCGGTTTTGCAGACTACCATCTTCCCTGCAACTC
ASCRP3000174	19	22	16	21	21	33.5	40	70	62	75	110	94.5	hsa_circRNA_005880	hsa_circ_0005880	circBase	chr5	+	68881420	68888157	sense overlapping	NM_001042490	GTF2H2C_2	AAACTTTTTGCTAAGAAAAGGCATTTGGATGGCAATACTGAGCCAGGGCTTACATTAGGA
ASCRP3000175	40	41.5	32.5	50.5	41.5	60	41	32	30.5	119	97	97.5	hsa_circRNA_045801	hsa_circ_0045801	circBase	chr17	-	74385612	74397235	exonic	NM_022066	UBE2O	AAACTTTTTTTTACTTGCAGGTCTCTTCTTCGATGATTCCTATGGCTTCTACCCAGGCCA
ASCRP3000178	20.5	22	21	23	21	90	62	139.5	76	199.5	317	224	hsa_circRNA_400435		25242744	chr1	+	230795209	230800333	exonic	NM_007357	COG2	AAAGAAACCTCTGCACTAGAAGCAAGCAGGAAGATTTCGATGTCGATCATTTTGTGTCTG
ASCRP3000179	36	178	120	31	27	65.5	240	241	154.5	131	179	123	hsa_circRNA_002554	hsa_circ_0002554	circBase	chr3	-	53908237	53910107	exonic	NM_022899	ACTR8	AAAGAAACTTTTTGTCATTTAGATCAGGGATTGTGGTCCATCAGGAGTCTGTGTGTGCCA
ASCRP3000180	27	24	22	30	23.5	640	100.5	170	158.5	1809	3772	1838	hsa_circRNA_100676	hsa_circ_0019799	circBase	chr10	-	105106994	105107207	exonic	NM_001011663	PCGF6	AAAGAAAGAGGTCTAGAAGTACCTAAACCTGGTTGGACCGACAGTTACAAGACATAGTGT
ASCRP3000181	26	25	22	33	22.5	52	137	167	256	262.5	236	172	hsa_circRNA_000615	hsa_circ_0000615	circBase	chr15	+	64791491	64792365	sense overlapping	NM_015042	ZNF609	AAAGAAAGTCAAGTCTGAAAAGCAATGATGTTGTCCACTGGGCATGTACTGACCAATGTG
ASCRP3000182	22	25	20	23	22	37	35	56.5	36.5	71	83	65	hsa_circRNA_009118	hsa_circ_0009118	circBase	chr1	+	15860731	15874923	exonic	NM_015291	DNAJC16	AAAGAACATATAAACAGGCCTGCCGATGTTATCCAGGCATCCTGACAAAAACAAAGATCC
ASCRP3000183	57	35	33	50	37.5	572	113	256	270	869	2632	1212.5	hsa_circRNA_407172		25070500	chr9	-	35148956	35149174	sense overlapping	ENST00000439134	RP11-182N22.7	AAAGAACCTTGGAATGTGAAGAGACATGAGATGGTAGCTGAACCCCCATGTTGACATTTA
ASCRP3000184	24	26	29	20	19	49	34	24	33	81	68	55	hsa_circRNA_401083		25242744	chr12	-	121932381	122016851	exonic	NM_032590	KDM2B	AAAGAAGACTCCAAAGCGCCCGATTGACCGCCAGCGATACGACGAGAACGAGGACTTGTC
ASCRP3000185	23	28	26	25	26	42	35	30	34	113	124	98	hsa_circRNA_067524	hsa_circ_0067524	circBase	chr3	-	138400808	138407816	exonic	NM_006219	PIK3CB	AAAGAAGCTGGTTTGGATCTTCGGTCAGAAGTGCACATTCCTGCTGTCTCAGTACAATTT
ASCRP3000187	22	23.5	20	22	21	56	33	78	39	88	92	78	hsa_circRNA_404765		25070500	chr10	-	70209784	70225569	exonic	NR_102264	DNA2	AAAGAATCAAATTCTATTGAACACCGTAGTCAGAGCTCTGATCCAGCCACACGCCAAATG
ASCRP3000188	19	21	17	21	24	38	32	22	25	65	164	100	hsa_circRNA_405630		25070500	chr17	-	74340751	74344662	exonic	NM_002766	PRPSAP1	AAAGAATCTGTTCGTGGCCAAGATATTTTCATTATACAGACAATACCCAGGCGCCTTGGT
ASCRP3000189	23	22	19	25	25	37	55	37	92	92	79	83.5	hsa_circRNA_016681	hsa_circ_0016681	circBase	chr1	-	226054811	226065294	exonic	NM_014698	TMEM63A	AAAGACCCGTATAGTTTTGGGAGGACAACAATAGCAAACCTACAGACTGAGGAAGACAGG
ASCRP3000190	28	27	25	44	46	46	39	36.5	34	91.5	101	86.5	hsa_circRNA_102686	hsa_circ_0053967	circBase	chr2	+	36668400	36749456	exonic	NM_016441	CRIM1	AAAGACCTGTCTTGAGAAAAGGCCAGTGTTGTCCCTACTGCATAGAAGAGAAGCCAGATT
ASCRP3000191	90	88	67	116	84	655	127	116.5	112	791	855	719.5	hsa_circRNA_104090	hsa_circ_0006109	circBase	chr6	+	30618770	30619243	exonic	NM_145029	C6orf136	AAAGACGAGCATTACCGCTTCCCAAGCTCTTCCTTCAGTCCCACGACTACAGTCTGTATT
ASCRP3000192	27	39	46	31	33	49	58	64	57	111.5	137	84	hsa_circRNA_039783	hsa_circ_0039783	circBase	chr16	+	67070541	67100701	exonic	NM_001755	CBFB	AAAGACTGGATGGTATGGGCTGTCTGGAGTTTGATGAGGAGCGAGCCCAGGCTTTTGTGG
ASCRP3000193	40	27	26	40.5	35	48.5	75	275	145	118	90	100	hsa_circRNA_002961	hsa_circ_0002961	circBase	chr8	+	98698895	98703416	exonic	NM_178812	MTDH	AAAGACTGGGGAAGGAGTTGGAGTGACCGTTCAATATTTTCTGGCATTGTCAAAGAAAAA
ASCRP3000194	33.5	26	24	27	28	64	37	93	60	156	270.5	184.5	hsa_circRNA_103943	hsa_circ_0004345	circBase	chr5	+	134010304	134011815	exonic	NM_021982	SEC24A	AAAGACTTAGTGCAACACCACAGCTTACTAACAAGAATCCCAAAATGAGCCGAAGTGTTG
ASCRP3000198	30	34	30	25	25	55	40	29	28	82.5	77	77	hsa_circRNA_086376	hsa_circ_0086376	circBase	chr9	-	14146687	14179779	exonic	NM_005596	NFIB	AAAGAGATCAAGATTCTGGACAATCAGGAAGTCCAAGCCACAATGATCCTGCCAAGAATC
ASCRP3000199	11349	22141	9233	12181.5	7180.5	13262	20080.5	35791.5	12735	13587.5	13893.5	12069	hsa_circRNA_102890	hsa_circ_0002867	circBase	chr2	-	200245086	200298237	exonic	NM_015265	SATB2	AAAGAGATGAACCAGAGCACATTAGCCAAAGAATGCCCTCTCTCCCAGGTTTGATGATTC
ASCRP3000201	49	45	32	36	31.5	92	85.5	342	160.5	284	396	300	hsa_circRNA_005828	hsa_circ_0005828	circBase	chr10	-	88231964	88233730	exonic	NM_015045	WAPAL	AAAGAGCACTCAGCCTCTAAACACACGTTGCCTTAGTCACCCACAAAAGCTGTATATAAT
ASCRP3000202	36	28	28	28	27	83.5	52	44.5	66	146.5	251	166	hsa_circRNA_102469	hsa_circ_0008432	circBase	chr19	+	16192722	16197350	exonic	NM_003290	TPM4	AAAGAGGCCAAGCACATTGCGGAAGAGGCTGACCGCAAATACGAGGAGGCTGAAGGTGAT
ASCRP3000205	49	30.5	27	44.5	42	295	85	213.5	161	259	672	427	hsa_circRNA_002876	hsa_circ_0002876	circBase	chr17	+	19213197	19232960	exonic	NM_014964	EPN2	AAAGATGACTTTTCTGAATTTGACAACCTTCGGACTTCAAAAAAAACAGCCACCTCCCCG
ASCRP3000206	22.5	23	20.5	20	21	57	27	22	21.5	84.5	92	77.5	hsa_circRNA_101375	hsa_circ_0032304	circBase	chr14	+	68290258	68292294	exonic	NM_002877	RAD51B	AAAGATGCAAACGGCATGGGTAGCAAGAAACTAAAACGAGTGGGTTTATCACAAGAGCTG
ASCRP3000207	28	29	27	53	57	119	184	1055	492	340	588	430	hsa_circRNA_100794	hsa_circ_0003768	circBase	chr11	+	34978930	35006275	exonic	NM_003477	PDHX	AAAGATGCTGCTGCTAAAGGTATCCAGGAAATTGCTGACTCTGTAAAGGTTGAAGAAGGA
ASCRP3000208	47.5	27	26	36	37	36	34	35	31	87	77	76	hsa_circRNA_104770	hsa_circ_0086748	circBase	chr9	-	34269254	34271928	exonic	NM_194313	KIF24	AAAGATGGAAGGTGCAGAAATAAATCAGAGTCTACTGGCTGTGATCTTAAAGGGCAGCAA
ASCRP3000209	24	25.5	23	29	23.5	35	34	25	26	59	53	55	hsa_circRNA_021832	hsa_circ_0021832	circBase	chr11	+	46342260	46342972	exonic	uc001ncg.3	CREB3L1	AAAGCAAAACCAAAAAAAAAAAAAAAAAGATGCAGCATCAAGATCTGGGCCCCAACACCA
ASCRP3000210	325	204	162	218	203.5	295	172	197.5	195	366.5	346.5	319	hsa_circRNA_079201	hsa_circ_0079201	circBase	chr7	+	2638098	2644625	exonic	NM_152558	IQCE	AAAGCACATGGCTCAGAGCCACCCAGCGTGCCAGGCCTCCCAGACCAGGCCCAAGAGCTC
ASCRP3000212	26	24	21	27.5	29	32	40	27	34	68	65	57	hsa_circRNA_000506	hsa_circ_0000506	circBase	chr13	-	113845185	113854830	exonic	NM_018386	PCID2	AAAGCAGCAGAGTTACTGATGAGCTGTTTCCGGGTCTGTGCCAGCGACACGTGTACGAAG
ASCRP3000213	66	42.5	45	62	53	802	198	912	420	820	1896	1153	hsa_circRNA_102781	hsa_circ_0055605	circBase	chr2	-	96601201	96610922	exonic	uc010yug.1	DKFZp667P0924	AAAGCAGCCATGAGAAGGAAGGATTCACCACCTCCAGGAAAAGAATATTTCAGAACCATA
ASCRP3000214	33	23	23	30	25.5	137	56.5	54	48	317	741	469.5	hsa_circRNA_002635	hsa_circ_0002635	circBase	chr13	+	31789187	31803431	exonic	NM_194318	B3GALTL	AAAGCAGGCTGCAGATCTTACACAGCTTTTGGTTTGGCTTCTGAAGATACAAAGAAAGAG
ASCRP3000215	62	51	44	66.5	37	648.5	155	173	244	1336	2859	1608	hsa_circRNA_103868	hsa_circ_0072797	circBase	chr5	+	68915840	68916286	exonic	uc010ixi.1	SMA	AAAGCAGGTCTTTTCTACACAGGGAGAACATTTTGTGAATTCCTGGGTCCAGAGAGAATT
ASCRP3000216	22.5	22	23	22.5	24	149	57	147	93	512	680	557.5	hsa_circRNA_024067	hsa_circ_0024067	circBase	chr11	+	95546095	95546753	exonic	NM_014679	CEP57	AAAGCATGCCGAAATGGAGAGGACATCTGTCTTAGAGAAACAACCATATTTTCTGCTCTT
ASCRP3000217	173	201	257	203	102	8108	990	3313	1833	9772	14000	10332	hsa_circRNA_100018	hsa_circ_0009361	circBase	chr1	-	1749275	1770677	exonic	NM_002074	GNB1	AAAGCATGTGCAGATGCAACTCTCTCTCAGACAAATTTACATGTATTGGAGACCAGACCA
ASCRP3000218	32	24.5	21	38	36	38	32	21.5	27	73	70.5	70	hsa_circRNA_406294		25070500	chr3	-	65729590	65731263	intronic	ENST00000330909	MAGI1	AAAGCCCACACATAATCATGGTGTCTTGGTAAGGAATTACATTTGGTTCTGCCTGGTTTC
ASCRP3000220	28	25	22	30	20	700.5	45	45	47	1037	1555	858	hsa_circRNA_407327		25070500	chrX	+	128691301	128692978	exonic	NM_000276	OCRL	AAAGCGAGAGAAAGAATATGTCAACATTCAGACTTTCAGGTGGCTGCAAAATTCGGGTTC
ASCRP3000221	613	436	445	233	130	3227.5	1275	2310	1966	6871.5	9734	6272	hsa_circRNA_104766	hsa_circ_0001851	circBase	chr9	-	33971648	33973235	exonic	NM_018449	UBAP2	AAAGCTAGTAGTTTGGGAAGCTGCTCAGAATGGTGCAGATGAGGGAACTGGATTTGGACG
ASCRP3000222	21.5	25	20	23	20.5	106	109.5	936	230	583.5	1071	511.5	hsa_circRNA_405026		25070500	chr12	+	70149163	70150443	exonic	NM_022456	RAB3IP	AAAGCTCAGAGGGTTATCTTATGATGAGGCTTTTGCTATGGCTAATGATCCCTTGGAAGG
ASCRP3000223	25	20	20	36	37	38	31	26	22	71	71	65	hsa_circRNA_103630	hsa_circ_0069570	circBase	chr4	-	41145003	41145159	exonic	NM_004307	APBB2	AAAGCTCCTGTGAAAAGCTGAGGCTGACAATAATTTAAGCAAAATCAGGTTGGAGTTGCT
ASCRP3000224	103	90	79	110	64	499.5	98	103	70	698	763	549	hsa_circRNA_101378	hsa_circ_0032353	circBase	chr14	+	70170111	70171459	exonic	NM_014734	SUSD6	AAAGCTGAAGTCTTTCCATCATAGCAGTGTGCCCCCTACCACCGGAGCCAGAGAATGGTG
ASCRP3000225	21	23	22	22	23	42	27	22.5	24	72	62.5	54	hsa_circRNA_102892	hsa_circ_0057703	circBase	chr2	+	201303844	201305507	exonic	NM_015535	SPATS2L	AAAGCTGCCTTTGCTGAATTACACAACTGAAGGCAACAGACTACTGCAACAGAAACTATC
ASCRP3000226	27	27	25	28	28	108	46	118	104.5	250	339.5	234	hsa_circRNA_105043	hsa_circ_0007100	circBase	chrX	+	153996576	153997585	exonic	NM_001363	DKC1	AAAGCTGTTGACATCTCATAAACGGCTGGTTATGAAAGACAGTGCAGAATCTTTTGGGTG
ASCRP3000228	24	25	21	34	38	29	30	33	25	69	64	63	hsa_circRNA_406051		25070500	chr2	+	223781036	223789313	exonic	NM_004457	ACSL3	AAAGGACGTAATACTCCACTGTGCGACAGGTTATTCTTGGACAGTATAATTGGCTTTCCT
ASCRP3000229	24	21	19	31	32	32	38	31	28.5	70	82	141	hsa_circRNA_102923	hsa_circ_0058451	circBase	chr2	+	223782763	223789313	exonic	NM_004457	ACSL3	AAAGGACGTAATACTCCACTGTGCGACAGTTGTTACATTATATGCCACTCTAGGAGGTCC
ASCRP3000230	43	37	36	54	40	100	295	2114	676	278	524.5	346	hsa_circRNA_406107		25070500	chr20	-	35693826	35696589	exonic	NM_002895	RBL1	AAAGGAGAATGCCTCCTGGACCTTTCAAGTTTTACTGATAATAGTTTAATACAATTTTTT
ASCRP3000231	35	41.5	45.5	34	32	99.5	45	43	44	134	200	145	hsa_circRNA_404544		25070500	chr1	-	86590527	86611866	exonic	NM_152890	COL24A1	AAAGGAGACACTGGACCTCCCGAAATCACTTCTTCATTTTATTGTACTATGTGTGGCTGG
ASCRP3000232	23	33	26	24	27	56	44	84	56	194	194	161.5	hsa_circRNA_400893		25242744	chr12	+	19646733	19646920	exonic	NM_153207	AEBP2	AAAGGAGGAAATTAAAGAACAAAAGACGACGCTCATTACTGTGTTGTTGGTGGCTGCAAT
ASCRP3000233	26	24	20	24	30.5	37.5	29.5	31.5	31	62	59	63	hsa_circRNA_405573		25070500	chr17	+	37700501	37723145	sense overlapping	ENST00000558240	CDK12	AAAGGAGGAAGTAGGTTAGGGAATGGTAGGAGCAACGGTGGGAATGCCCTCTGAGGAATG
ASCRP3000234	27	26	26	30	24	155	170	883	531.5	797	1144.5	867.5	hsa_circRNA_001635	hsa_circ_0001635	circBase	chr6	-	108243000	108250718	exonic	NM_007214	SEC63	AAAGGAGGTGATGAGGTTATGTTCATGAGGATAGCAAAAGCTTATGCTGCAGCAAATTCG
ASCRP3000235	21	22	18	19	21	84	28	34	39	102	153.5	122.5	hsa_circRNA_405908		25070500	chr2	+	70092031	70098964	exonic	NM_178439	GMCL1	AAAGGATCAGGCCTCAAGAAATCAATAAAGAAGAACTAGAGGGAAACAGCATGAGGTGTG
ASCRP3000236	51	40	34	67	59	70.5	35	29	29	116	109	78	hsa_circRNA_102766	hsa_circ_0055251	circBase	chr2	+	74056531	74087278	exonic	NM_006463	STAMBP	AAAGGATTTCATCCACACAGCAAGGATCCACCTCTGTTCTGTATGCTGCATCCCCTTTTT
ASCRP3000237	22	29	30	27	25	180	43	113	61	316.5	569	345	hsa_circRNA_002102	hsa_circ_0002102	circBase	chr3	+	40502897	40503739	sense overlapping	NM_003973	RPL14	AAAGGCATCTGGCAAGAAAGCATAAGTGGCAATCATAAAAATGCCCACCAGAAGTATGTC
ASCRP3000238	32	30	25	28	24	597	144	1008.5	390.5	1852	1902	1494.5	hsa_circRNA_092535	hsa_circ_0001379	circBase	chr3	-	195802074	195802221	intronic	ENST00000420415	TFRC	AAAGGCCAATGTCACAAAACCAAAAAGGTGTAGTGGAAAACCATTGTCATATACCCGGTT
ASCRP3000239	29.5	31	28	39	36	176.5	46	81	42	216	348	232	hsa_circRNA_101527	hsa_circ_0006380	circBase	chr15	+	57523349	57526305	exonic	NM_003205	TCF12	AAAGGCTTTGGCATCTGTATATGCACCATCCCCAAATTCAGATGATTTCAACCGTGAATC
ASCRP3000240	68	65	54	65	54.5	262	60.5	52	45	310	227	190	hsa_circRNA_049704	hsa_circ_0049704	circBase	chr19	+	14038705	14039001	exonic	NM_017721	CC2D1A	AAAGGGAAGGCCCCTCCTGTGCCTGCCCCTGCAAGGGAGTCAGGGAACAGGTCCTGGATG
ASCRP3000241	44	51	40	32	37	35	66	35	49	69	46	41	hsa_circRNA_030448	hsa_circ_0030448	circBase	chr13	+	76301164	76415337	exonic	NM_005358	LMO7	AAAGGGCCAAACAGGAGGCAGAGAGAGAGAATTCCAAGTACTTGGATGAGTTTGATTAAT
ASCRP3000243	23	24	23	27	24	54	36	31	37	98	151	122	hsa_circRNA_104751	hsa_circ_0003762	circBase	chr9	+	33036571	33037113	exonic	NM_001539	DNAJA1	AAAGGGTCGCCTAATCATCGAATTTAAGACGAGGAGAAGACCTTTTCATGTGTATGGACA
ASCRP3000244	19	21	20	23	24.5	35	31	40	20	67	74	60	hsa_circRNA_104883	hsa_circ_0088090	circBase	chr9	+	115179120	115181238	exonic	NM_032303	HSDL2	AAAGGTGAAATTGCAGTCAATGCATTATGGCCTAAAACAGATCTAAAGCATGTATTCCTT
ASCRP3000245	27	20	20	23	22	48	31	34	30	89.5	118	100	hsa_circRNA_103991	hsa_circ_0006694	circBase	chr5	+	151176787	151178874	exonic	NM_005754	G3BP1	AAAGTACCAGCTTCACAGTAATGACATGGAAGAACATTTAGAGGAGCCTGTTGCTGAACC
ASCRP3000247	37	40.5	39	39	35	80	67.5	100	89.5	223	354.5	167	hsa_circRNA_101648	hsa_circ_0000651	circBase	chr15	+	90982563	90986710	exonic	NM_003870	IQGAP1	AAAGTCAATATTTGTACCTGTTCAAGCTAGGCCTGGCCCCTCAGATTCAAGACCTATATG
ASCRP3000249	24	24	23	24	23	53	34	72	45	166	348.5	216	hsa_circRNA_100418	hsa_circ_0015663	circBase	chr1	-	185094075	185106928	exonic	NM_030934	TRMT1L	AAAGTCAGTTTTCAATTCATGCATCTTCAAATGTCAACAAGCAAGAGCTGCAGCCCGATG
ASCRP3000250	25	30	29	28	28	97	49	51	39	172	193.5	131	hsa_circRNA_089506	hsa_circ_0089506	circBase	chr9	-	138824814	138847261	exonic	NM_016172	UBAC1	AAAGTCCCTTTTCCTATGTGCTCATGGGAGCTTAGAAGATCCCAAAAGTATAACCCATCA
ASCRP3000251	43	118	231	186	170	39	191	486	140	154	102	109	hsa_circRNA_100719	hsa_circ_0020390	circBase	chr10	+	128768965	128836080	exonic	NM_001380	DOCK1	AAAGTCGATGGTGGTGAAGTAGTGAAGCTTTTTATAACTATGATGCCAGAGGAGCGGATG
ASCRP3000253	22	21.5	16	21	21	37	35	32	31	68	70	60	hsa_circRNA_102013	hsa_circ_0003481	circBase	chr17	-	27248705	27251320	exonic	NM_020889	PHF12	AAAGTCTGCTTCACGTGTAACAGAAACGAGAGCAGAAAAAGGAGCTGGGTCATGTCAATG
ASCRP3000254	23	21	20	26.5	27	78	30	20	24	186.5	254	192	hsa_circRNA_104026	hsa_circ_0005819	circBase	chr5	+	176671195	176673797	exonic	NM_022455	NSD1	AAAGTGAAAAATGATGACTCGTCAAAAGAGATTCCAGGCTCAGAGTGCTATGAAGCTGGT
ASCRP3000255	42	37	35	35.5	29	268	206.5	1372.5	521	368.5	674	414	hsa_circRNA_400694		25242744	chr11	-	2985909	3000467	exonic	NM_005969	NAP1L4	AAAGTGAAATTTTCTGACCCTGGACAGCCTATGGGGATAAAAACATTCAGATGGCAGATC
ASCRP3000257	20	21	22	21	22	39	40	70.5	39	95	91	68	hsa_circRNA_083824	hsa_circ_0083824	circBase	chr8	+	28827559	28828036	exonic	NM_024567	HMBOX1	AAAGTGGAAGAATTAATGAGTTTGCTGGAAACCATGTCTCATTATACAGATGAACCCAGA
ASCRP3000258	29	33	36	37	43	41	31	29	29	81	78.5	77.5	hsa_circRNA_405405		25070500	chr15	+	79748439	79761487	sense overlapping	NM_015206	KIAA1024	AAAGTGTAGGGGAGCTGCCTGCTAACGATGTAAGAACTGACCTGAAGTTTCAGTGTAGTC
ASCRP3000259	201	152	94	219	192.5	1047	157	89	118	1002	1244	997	hsa_circRNA_083815	hsa_circ_0083815	circBase	chr8	-	28669843	28671129	exonic	NM_018250	INTS9	AAAGTGTCTTATGTCTCTGGATCCTCCTTGCTTACCACACACCCCCAGGCTGTTACCTTC
ASCRP3000260	217	83	83	186	214	606	313	691.5	636	865	2939	1787	hsa_circRNA_000761	hsa_circ_0000761	circBase	chr17	-	37455242	37457328	exonic	NM_032875	FBXL20	AAAGTTAAGTCTTCGTGGATGTCTTGGAGTGGGAGACAATGCATTAAGGCCTGGAATGTT
ASCRP3000261	36	34	33.5	19	23	34	102.5	468	117	75	73	69.5	hsa_circRNA_102294	hsa_circ_0000826	circBase	chr18	+	9182379	9221997	exonic	NM_015208	ANKRD12	AAAGTTACACAGATCCAGGATGAGAAGACTGATAAAAGAAGAAGCTAGCTGAACAGCTGT
ASCRP3000262	36	47.5	37.5	51	36	184	84	366	224	331	514	274.5	hsa_circRNA_101978	hsa_circ_0005869	circBase	chr17	+	8347577	8363478	exonic	NM_030808	NDEL1	AAAGTTCTCTCGATCAGGGCATACATCTTTCTTCGACAAAGGGCTTTCTTGATCATGGAT
ASCRP3000263	19.5	22	20.5	20	19	39	25	25.5	22	65.5	81	66	hsa_circRNA_056978	hsa_circ_0056978	circBase	chr2	+	170747674	170753245	exonic	NM_172070	UBR3	AAAGTTGCCTTATTAAAAGTGAGCTACAAGGATGATCAGGATGGTAGTCAAGGTCTGGGC
ASCRP3000265	39	27	26	38.5	36	76.5	35.5	38	31	111.5	160.5	121	hsa_circRNA_405514		25070500	chr17	-	421177	421699	intronic	ENST00000574029	VPS53	AAATAAAAATTTGCAAGGTGTCCACAGCACTTTCCAGCGTCATCTGAAATAGCAAAGGTG
ASCRP3000266	26	25.5	21	20	19	39	31.5	26	21	70	53	48	hsa_circRNA_052153	hsa_circ_0052153	circBase	chr19	+	54710420	54711515	exonic	uc002qec.3	RPS9	AAATAAACAGGATCAGCGCTTTACAACCCTCGGAGGTGATGGGTGTGAACTCACCCAGAG
ASCRP3000267	171	266	192	178	139	804	172	124.5	106	990	666.5	707	hsa_circRNA_050054	hsa_circ_0050054	circBase	chr19	+	17972902	17974124	exonic	ENST00000599898	RPL18A	AAATAAACTCAGGAACGCCCCGGTGTGTTTGAGAAGTCCCCCCTGCGGGTGAAGAACTTC
ASCRP3000269	26.5	23.5	23.5	29	31	33.5	31.5	30	24	62	60	56	hsa_circRNA_047559	hsa_circ_0047559	circBase	chr18	-	43664109	43667198	exonic	NM_004046	ATP5A1	AAATAAAGGTTCCATAATGCATAGTTGCTGTTGCTTACCGTCAGATGTCTCTGTTGCTCC
ASCRP3000270	40.5	34	33	32	30	77	73.5	41	40.5	92.5	128.5	110.5	hsa_circRNA_051908	hsa_circ_0051908	circBase	chr19	+	50000450	50002944	sense overlapping	NM_001015	RPS11	AAATAAAGTTATTTTCTCATTCCACTGAGCGTGCCTACCAAAAGCAGCCGACCATCTTTC
ASCRP3000271	60	153	124.5	63	55.5	145	86	136	77	289	181.5	196	hsa_circRNA_020960	hsa_circ_0020960	circBase	chr11	-	5269501	5270820	exonic	NM_000559	HBG1	AAATAATAAATCTATTCTGCTGAGAGATCACGCTCCTGGTTGTCTACCCATGGACCCAGA
ASCRP3000272	341	283.5	207.5	438	442	1502.5	319	193.5	276	1859.5	1340	943	hsa_circRNA_089353	hsa_circ_0089353	circBase	chr9	+	136217451	136218280	exonic	NM_000972	RPL7A	AAATAATACAAATTTTCCTTCCTGGTTGTCTTCTTGCCTGCCCTGTGTCGTAAAATGGGG
ASCRP3000273	91	95	82	80	66.5	901	96.5	59	70	755	659.5	609.5	hsa_circRNA_008077	hsa_circ_0008077	circBase	chrX	+	37245851	37285253	exonic	NM_000950	PRRG1	AAATAATGAAAAAACTGATGCTCACCCCATTTAGAGAAAGAAATCCACCTCCCCAACCCC
ASCRP3000274	109.5	191.5	190	181	137	1585	190.5	183	104	1100	968.5	908.5	hsa_circRNA_034125	hsa_circ_0034125	circBase	chr15	+	25312558	25351441	exonic	uc001yxh.1	SNURF-SNRPN	AAATAATTCTGCCCTCCCATTCTCAAGGGCCAGGGGGAATTCAAATATTGCAGTTGTCAT
ASCRP3000277	21	23.5	18	22	24	35	35	43	34	81	110.5	91	hsa_circRNA_103952	hsa_circ_0074079	circBase	chr5	-	137320945	137346838	exonic	NM_016603	FAM13B	AAATACCCAGCATTTACACAGATGTGGAAGACATGAAAGAGCAAGAAATAGTGAGCAGGA
ASCRP3000278	24	23.5	17.5	23	24	42	31	49	23	67.5	72.5	66.5	hsa_circRNA_400416		25242744	chr1	+	225190484	225284941	exonic	NM_001373	DNAH14	AAATACGAAGGTCATTTTTGTACCACCATCTTTTTTTGGCTGATGACTTGTTTCAAACCT
ASCRP3000279	87	100.5	150	54.5	47	497	147	151	178	1119	2458.5	1602.5	hsa_circRNA_401977		25242744	chr18	+	55833019	55919286	exonic	NM_015277	NEDD4L	AAATAGACTGGGAGAGTCCCGTATTCTCAGAGTAAAAGTTGTTTCTGGAATTGATCTCGC
ASCRP3000281	167	189	151	148	114	577	161	181	171	725	424	471	hsa_circRNA_401170		25242744	chr13	+	78318417	78320990	exonic	NM_144595	SLAIN1	AAATAGGACCAATGGAGGTTACACTTCCAGGGGCTCCCCACTCAGTCCCCAGTCATCTAT
ASCRP3000282	24	24	21	26	23.5	217.5	53.5	146	129.5	428	1051	748	hsa_circRNA_101603	hsa_circ_0006842	circBase	chr15	-	76566752	76585041	exonic	NM_000126	ETFA	AAATAGTAGCACCAGTGGCACAAGATCTCTGTAAAGTAGCAGGCATAGCAAAAGTTCTGG
ASCRP3000283	54.5	33	28	58	52.5	3263	175	839	466.5	4740	13873.5	8352	hsa_circRNA_006345	hsa_circ_0006345	circBase	chr9	+	4823547	4827033	exonic	NM_005772	RCL1	AAATAGTTCTACGAGGAGTGACCAATGATCAGGTTGACCCTTCAATTTTGAAGCCAGCTT
ASCRP3000285	34	24	20	41	40	39	39	90	63	72.5	92	80	hsa_circRNA_406259		25070500	chr3	+	37440967	37458215	exonic	NM_178339	C3orf35	AAATATCTTTTGGAGCTGCTGGATCAAGTATCACTTGAAGGGGAGAAAGGGATGAGGATG
ASCRP3000286	22	23	22	21	22	37	27	22	21	69	58	62	hsa_circRNA_405211		25070500	chr14	+	40111916	40125012	intergenic			AAATATGAGAGCTACAGTTCTGAGATGAAACCACAGGAGGCTTCTGAGTGGTTCTTCTGC
ASCRP3000288	41	34	31	50	53	50	38	37	42	75	66	64	hsa_circRNA_000449	hsa_circ_0000449	circBase	chr12	-	121154725	121157906	antisense	NM_001080533	UNC119B	AAATCAAAGTCAAAGTTTTTCAGCAAGTGTTCCCGGAAATAGTGCCCTTCGATCATCTCC
ASCRP3000290	28	24	20	26	36	35.5	30.5	24	26	77	53	63	hsa_circRNA_015871	hsa_circ_0015871	circBase	chr1	-	201103899	201123087	exonic	uc001gvy.3	TMEM9	AAATCAAGGAAGCCATCATTAAATTGTTTTATTTCTCTCAGTGTCCGGCTTTGCTGGCCC
ASCRP3000291	33	28.5	21	25	31.5	49	37	25	36	94.5	89	77	hsa_circRNA_100058	hsa_circ_0009986	circBase	chr1	+	12378128	12382803	exonic	NM_015378	VPS13D	AAATCAGAGAAGGGACAAGACACACCTTAGATCCTGTCTTGGATCTACCAAGGATTCCTC
ASCRP3000292	50	30	40	56	38	1383	271.5	794	535.5	2075	4855	3069	hsa_circRNA_100067	hsa_circ_0000020	circBase	chr1	+	15964801	15978390	exonic	NM_032341	DDI2	AAATCAGCAGAGGATGCAGGCAACAGAACATTGAGGAAAACATGACAATAGCTATGGAAG
ASCRP3000293	24	23	20	40	28	61.5	38.5	73	60	156.5	191	135.5	hsa_circRNA_102633	hsa_circ_0005952	circBase	chr2	-	20454623	20455931	exonic	NM_015317	PUM2	AAATCAGGGGAAAGGTTTTAGCCCTGAGTCAACACAAATTTGCCAGAGTGAAATGGTAAA
ASCRP3000295	28	27	26	32	29	37	39	148.5	54.5	85	100	81	hsa_circRNA_002822	hsa_circ_0002822	circBase	chr2	-	210993754	211019335	exonic	NM_152519	KANSL1L	AAATCCAACAACTAACAGACATTCACAGGCAAATTCGTGCCTCCAAGGTTTCCAATACTT
ASCRP3000296	35	27	30	26	25	32	28.5	23	26	54	56	53	hsa_circRNA_101081	hsa_circ_0000408	circBase	chr12	-	56824664	56826308	exonic	NM_003920	TIMELESS	AAATCCATTGGGGAGAGGGACCTCATCTTTCACAAAGGCCTTCACAACAAGATTGATGAT
ASCRP3000297	40	41	36	36	31	66.5	35	33	40	97	92.5	88	hsa_circRNA_404782		25070500	chr10	-	79064144	79065150	intronic	NM_001271518	KCNMA1	AAATCCTGGGGTTAGGGGCCCCTCTGCTATGGAGTTGAGACCCATGCCCTCAACCTCAAA
ASCRP3000298	23	26	27	24	24	52	32	59	28	79	81	69	hsa_circRNA_405487		25070500	chr16	-	72318470	72342087	sense overlapping	NR_126330	LINC01572	AAATCGACTCTGACTCAATCCTTGAGGTCTGGCCTCATCAGTGAAAAGAAGGACTGACTT
ASCRP3000300	20	22	23	40	33.5	29.5	27.5	24.5	25	76	57.5	65.5	hsa_circRNA_057607	hsa_circ_0057607	circBase	chr2	-	197755551	197763093	exonic	NM_024989	PGAP1	AAATCTACACTCATGTCTATTGTCAGAGCACTATGCTGAGTTCAGCAGTGCCTAAGACCT
ASCRP3000301	56	98	70	42.5	35.5	203.5	398.5	2009	719	1397	638	616	hsa_circRNA_003251	hsa_circ_0003251	circBase	chr12	+	1003727	1006847	exonic	NM_014823	WNK1	AAATCTAGTCGAAGCAGTTCCTTGGGGAATAAAAGCCCCCAGCTTTCAGTTTCTCAAGTC
ASCRP3000302	34	32	30	38.5	39	76	41	39	46.5	148	135	122	hsa_circRNA_104213	hsa_circ_0078165	circBase	chr6	+	147581750	147655358	exonic	NM_139244	STXBP5	AAATCTCCAACCTCTGGGTTACATTTTGCCATCTGCCTTTCCAGAGTAAGTGGCTCTATG
ASCRP3000303	31	32.5	30	28	29	139	39.5	22	25	145	127	125	hsa_circRNA_091722	hsa_circ_0091722	circBase	chrX	-	151934651	151936377	exonic	NM_005362	MAGEA3	AAATCTGAATAAATAATTCTTCCTCTTCAGTTCTGAGGGGACAGGCTGACCTGGAGGACC
ASCRP3000304	29	37.5	30	40	34	52	50	156	81	100.5	154	120	hsa_circRNA_405239		25070500	chr14	+	58965500	58979345	exonic	NM_014749	KIAA0586	AAATCTGATATTGCACCTTCACAGCAACAAGGACTTGGAAAACAGTGTGGGTGAACTTAG
ASCRP3000306	61	50.5	47	54	58	574	88.5	67	68.5	619	1016	678.5	hsa_circRNA_077879	hsa_circ_0077879	circBase	chr6	+	133136110	133138703	exonic	NM_001016	RPS12	AAATCTTTGGCTCACACATTGCTGCTGGAGGTGTAATGGACGTTAATACTGCTTTACAAG
ASCRP3000307	51.5	31	31	54.5	32	1003	142	209	321.5	668.5	1857	1259	hsa_circRNA_006750	hsa_circ_0006750	circBase	chr10	+	96234424	96260084	exonic	NM_015188	TBC1D12	AAATGAACTAAATATCACTCCTGGAATATGAAGCACGAACGGGGAGGACCTGTAAACCAC
ASCRP3000308	36	24	23	39	44	48	87	429	120.5	93	142	113.5	hsa_circRNA_002912	hsa_circ_0002912	circBase	chr3	+	44871462	44881948	exonic	NM_020242	KIF15	AAATGAGGCAACTAGAACATGTGATGGATTCTGCTGCTGAGGATCCCCAGAAAGTTGTAG
ASCRP3000310	45.5	58.5	82	31	38.5	102.5	37.5	42	52	145.5	155.5	129	hsa_circRNA_103730	hsa_circ_0005654	circBase	chr4	-	121675707	121732604	exonic	NM_018699	PRDM5	AAATGATGGACTGAAGATGCACATTCGTACTCACACCAGGGAGATCCTAAGAAAAAGCTT
ASCRP3000312	24	27	23	26	21	708	44	93	68	948	1946.5	1277.5	hsa_circRNA_000564	hsa_circ_0000564	circBase	chr14	-	95606995	95608085	exonic	NM_030621	DICER1	AAATGCAGTTCAGACAAGAGCAACACAGAGATCTCAAACATTAAAACGGTTACCTAGGGT
ASCRP3000313	32	29	22	38.5	48	41	45	44	41	85	135	108	hsa_circRNA_100167	hsa_circ_0011572	circBase	chr1	-	35940405	35944813	exonic	NM_024874	KIAA0319L	AAATGCATATGTTCTCCAAGAACCACCTAAAGGTCCACAAGGCGATTACAATTTCCAGTC
ASCRP3000314	26	23	18.5	23	28	40	47	233.5	144	262	314	280	hsa_circRNA_101805	hsa_circ_0039261	circBase	chr16	+	47531309	47537001	exonic	NM_000293	PHKB	AAATGCATGAGAGGAATTCTCTACTGCTATATGCGTCAGGCCGATAAGGCTCAGTTTATG
ASCRP3000315	21.5	22	17	68	52	36.5	27	38	27	67	76.5	71	hsa_circRNA_077745	hsa_circ_0077745	circBase	chr6	-	121491550	121563485	exonic	NR_104452	TBC1D32	AAATGCTCAAGAAGAAAATATCTTGGAGATTTCTGAGAGCCACAGTATGGCTTGGGAAGA
ASCRP3000316	21	26	26	29	30	154	32	23.5	26	233.5	226.5	190	hsa_circRNA_016661	hsa_circ_0016661	circBase	chr1	-	225718255	225755116	exonic	NM_018212	ENAH	AAATGGCCCATCCCAAGAAGAATTGGAAATTCAAAGAAGTGAACAGAGTATCTGTCAGGC
ASCRP3000317	32	31	31	30	40	196.5	40	47	61	519	865	526	hsa_circRNA_083127	hsa_circ_0083127	circBase	chr7	-	156619298	156626486	exonic	NM_022458	LMBR1	AAATGGCTCCCTGATTCATGATGAACAAGAAGATGAAGATGCCATCGTCAACAGGATTTC
ASCRP3000318	23	22	21.5	27	29	39	27.5	21	21.5	69.5	64.5	54	hsa_circRNA_036127	hsa_circ_0036127	circBase	chr15	+	71433787	72057538	exonic	NM_024817	THSD4	AAATGGTTTAGCACCGAATGGAGCATGGACTTGAACGCAACTCCCAATTGCAGAAAATTG
ASCRP3000319	21.5	22	19	21	22	43	44	40	66	168	148	123	hsa_circRNA_404401		25242744	chrX	+	117676687	117680079	exonic	NM_144658	DOCK11	AAATGTAAATAGTACCATCACAGTAACCATGAAGGAAAAGGCCAAAGTTGTTGAGCCCCT
ASCRP3000320	200	125.5	99	259.5	193.5	614.5	185	92.5	123	858.5	596	675	hsa_circRNA_031210	hsa_circ_0031210	circBase	chr14	-	23033806	23044133	exonic	NM_001344	DAD1	AAATGTAACCTTTTGCCTTCCAAATTAAAGAACTCCATGCCACTCCTCTTTGCCTGAGAA
ASCRP3000322	22	23	20	21	17	264	53	125	112	546	1079.5	633	hsa_circRNA_100594	hsa_circ_0006820	circBase	chr10	+	51381438	51387763	exonic	NR_110767	TIMM23B	AAATGTACAGGATACAGATGAGTTTATTTTACCTACCGGAGCTAATAAAACCCGGGGCAG
ASCRP3000323	57	30	28	70	81	59	75.5	194	115	100.5	118	101	hsa_circRNA_100356	hsa_circ_0014624	circBase	chr1	-	155734790	155736500	exonic	NM_001282856	GON4L	AAATGTCATCAGCTTCTGAGGAATCTGTGCTTTCTGTCCCAGAACTCCAGGCCAGTCTGC
ASCRP3000324	28	21	21	29	31.5	86	35	47.5	40	140	291.5	198	hsa_circRNA_407231		25070500	chr9	-	116091160	116094330	exonic	NM_145241	WDR31	AAATGTGGTGAAAAGGTTCAAAGGACATGAACATGAGATCACCAAGGGAACACAACTTCC
ASCRP3000325	54	42	36	63	58	252.5	496	2095.5	724	485.5	1185	818.5	hsa_circRNA_004145	hsa_circ_0004145	circBase	chr5	-	133493397	133509713	sense overlapping	NM_006930	SKP1	AAATGTTGTGCCTGACACTGTAACACTATGCCTTCAATTAAGTTGCAGAGTTCTGATGGA
ASCRP3000327	34	47	41	35	26	180	229	727	337	613.5	1018	670.5	hsa_circRNA_103495	hsa_circ_0001349	circBase	chr3	+	152132729	152150709	exonic	NM_021038	MBNL1	AAATTAATGCGAACAGACAGACTTGAGGGCCGTTGCTCCAGGGAGAACTGCAAATATCTT
ASCRP3000328	27	20	18	29	27	55.5	32	30	33	96.5	101	93	hsa_circRNA_402418		25242744	chr2	+	179455865	179465394	exonic	NR_038272	TTN-AS1	AAATTACAGACATCATCTCCTTTGAACAGGGAAAAGGTAACAGGTGGCTGCCATGAGATA
ASCRP3000329	93	69	63	130.5	145.5	276	82	113.5	97.5	298	296.5	268	hsa_circRNA_103308	hsa_circ_0064584	circBase	chr3	+	25622036	25622213	exonic	NM_000965	RARB	AAATTACCCTGCTGAAGGCCGCCTGCCTGGACATCCTGAATTCCAGTGCTGACCATCGAG
ASCRP3000330	27	33	22	28.5	28	91	52	138	112	255.5	609.5	439	hsa_circRNA_054547	hsa_circ_0054547	circBase	chr2	-	54119944	54120936	exonic	NM_014614	PSME4	AAATTATAGCTGGTTTAATCAGAGGTTCTAAGCACTGGACATTTGAAAAGGCAGAACAGA
ASCRP3000331	56	52	39	53.5	42	405	137	1008	635	1081	2027	1467	hsa_circRNA_103492	hsa_circ_0001346	circBase	chr3	+	149563797	149639014	exonic	NM_007282	RNF13	AAATTCAAGAAAGGTGATTTTACAACGAGATGCTGCTCTCCATAGGGATGCTCATGCTGT
ASCRP3000332	24	23	23	24	23	49	29	24.5	25.5	60	62	62	hsa_circRNA_405568		25070500	chr17	-	33805093	33807214	exonic	NM_001195790	SLFN12L	AAATTCAGCCACTGAGATATCACCTTCCAGAAAAGAATTTCTGCGTGGAAATGGCTTAGC
ASCRP3000333	24	22	19.5	23	21	63	35	86	69.5	113	221	154.5	hsa_circRNA_006861	hsa_circ_0006861	circBase	chr6	+	64356431	64390062	exonic	NM_001290259	PHF3	AAATTCAGTGAGATCTCCAAGAAAATCACCTCGTTTAATGGCACAAGGGCTGAAAGACAC
ASCRP3000334	33	60	63.5	35.5	36	46	104	116	58	85	83	70	hsa_circRNA_403874		25242744	chr7	-	98643320	98645505	exonic	NM_020429	SMURF1	AAATTCCGTGGGGAAGAAGGTTTGGATTACGGTGGTGTGGCCAGTCACCAGTGCCAACTC
ASCRP3000336	45	37	38	131	79	2424	422	1537	1077	4174	7326.5	5338	hsa_circRNA_406724		25070500	chr5	+	179976936	179977117	intronic	ENST00000504343	CNOT6	AAATTCGTAGCTTACCCGCAGAACTCGGAAACATGGTATCACTCAGTAAGAAGCTTAAGC
ASCRP3000337	40	37	36	42	39	144.5	58	132.5	102	376	471.5	395	hsa_circRNA_100517	hsa_circ_0017348	circBase	chr1	-	247322307	247323115	exonic	NM_003431	ZNF124	AAATTCTTCAAGAAATCTAAGAACTCGGTTGCCTTTGAGGATGTGGCTGTGAACTTCACC
ASCRP3000338	29	25	23	25	27.5	38.5	31	20	24	65	55	64	hsa_circRNA_406082		25070500	chr20	+	9417648	9424890	exonic	NM_000933	PLCB4	AAATTCTTTAAAGAAGAAACATGCAAAGAGTGACATAGCCGACGTGCCCAGTGACACTTC
ASCRP3000340	31.5	24	20	41	41	44	34	31	30	79.5	52	54.5	hsa_circRNA_087581	hsa_circ_0087581	circBase	chr9	+	97207245	97213809	exonic	NM_032558	HIATL1	AAATTGCAGCATTCATAGCTATGGTAGGAATTCTGTCTATTGTGGCTCAGGTCTCAGCCA
ASCRP3000341	39	94.5	73	26	28	42	77	189	179	72	83	76	hsa_circRNA_104882	hsa_circ_0003597	circBase	chr9	+	115166274	115181238	exonic	NM_032303	HSDL2	AAATTGCAGTCAATGCATTATGGCCTAAAACAGGAGGCTGGCAGGATGTACAGTTTTTAT
ASCRP3000342	22	18	19	27	27	154.5	62	192	156	548	923.5	613	hsa_circRNA_002481	hsa_circ_0002481	circBase	chr18	+	43702432	43704859	exonic	NM_138443	HAUS1	AAATTGGAGTCCTATTTAGACTTAATGCCGGGATGTCAAGAAAGCAGAGTTGCATCTGTC
ASCRP3000343	28	24	26	29	27	47	48	167	89	136	195	165	hsa_circRNA_100872	hsa_circ_0000337	circBase	chr11	+	70200406	70202360	exonic	NM_003626	PPFIA1	AAATTGGGGGGACAGGCTGAAAAAAATCGTAAACTTCAAAAAAATTGCCACCTTCCAGAG
ASCRP3000344	23	22	18	32	26	122.5	54	34.5	35	417	471	307.5	hsa_circRNA_004650	hsa_circ_0004650	circBase	chr12	+	47497895	47501947	sense overlapping	NM_138371	PCED1B	AAATTGTTGACTTGCAAGATGATGAGGATTTCCAGATAGACACAGGTAATGAGAGGCCCT
ASCRP3000346	37	48	50	57	67	57	60	389	190	440	276.5	367	hsa_circRNA_104803	hsa_circ_0087354	circBase	chr9	-	86292641	86292876	exonic	NM_013438	UBQLN1	AAATTTGGTGCCTGGAGTAGGAGTTTGGTGGTAATCCATTTGCTTCCTTGGTGAGCAATA
ASCRP3000347	36	45	52.5	42	30	34.5	48	47	35	67	49	47	hsa_circRNA_005185	hsa_circ_0005185	circBase	chr14	-	30093357	30105700	exonic	NM_002742	PRKD1	AACAAAACAAGAAAGCCAGCTTCGTAATGAGGTTGCAATTCTACAGATTTGCTTAGCCCT
ASCRP3000348	4322	8804	7812	2753	464	8051.5	2850.5	2422.5	994.5	4330	8234	5967	hsa_circRNA_049637	hsa_circ_0049637	circBase	chr19	+	13049413	13055304	exonic	NM_004343	CALR	AACAAAATTTCTATTAAATTAAATTTTGTGTCTCCGCGGCGTCCGTCCGTACTGCAGAGC
ASCRP3000349	26	22	19	25	23	122.5	48.5	76	60	169	255	194.5	hsa_circRNA_101577	hsa_circ_0003166	circBase	chr15	+	69728476	69729061	exonic	NM_004856	KIF23	AACAAACAATCAAGTCATGAGATTTGCGGAAGTGACTCAAGAAGTTGAAGTAGCAAGACC
ASCRP3000350	51	48	47.5	52	45	130	60	50	59	183	249	220.5	hsa_circRNA_003657	hsa_circ_0003657	circBase	chr17	+	41576229	41577471	exonic	NM_004941	DHX8	AACAAACACTGGGTTGACCCTCTGCCTGATGATGAGGACCTTGAGATTGAATTGGTTGAG
ASCRP3000351	53	37	31	45.5	27	145	313.5	849	307.5	409	843.5	498	hsa_circRNA_100093	hsa_circ_0004808	circBase	chr1	-	22047528	22048257	exonic	NM_032236	USP48	AACAAAGCAACGGAAAGATGAACGGTAGCACCTTAAATAAAGTGAAAGCCCTGTGTAAGG
ASCRP3000352	31	24	19.5	37	38	30	30	27	37	70	66	55	hsa_circRNA_061687	hsa_circ_0061687	circBase	chr21	-	38610760	38612940	exonic	NM_006052	DSCR3	AACAAAGTTCTGTATGAGACGTATCATGGCGTGTTTGTCAACATTCAGGAAGTGCTCTCT
ASCRP3000353	24	23	20	23.5	24	37	40	90	61.5	103.5	103	96	hsa_circRNA_402268		25242744	chr2	+	61406115	61413632	exonic	uc002sbb.2	AHSA2	AACAAATAAGAAGATCATCATGAAATGGAGATGTGGGAACTGGCCAGAAGGACAGAGCGG
ASCRP3000354	22	19.5	19	22	21	57	29	29	36	92	179.5	131	hsa_circRNA_104054	hsa_circ_0075533	circBase	chr6	+	5404774	5431405	exonic	NM_006567	FARS2	AACAACAACTGGTCAATTCAGTTATTTGCTGGTATAAAGGATGGAGAAAGCCTGCAGCTC
ASCRP3000355	62	56	28	61	62.5	472	144	370.5	274	1014.5	2205	1237	hsa_circRNA_400980		25242744	chr12	+	58339410	58347472	exonic	NM_033276	XRCC6BP1	AACAACACCACCAGATCCATATGTCAAACTTCTGCTTGATGCTATGAAACACTCAGGTTG
ASCRP3000357	25	24	23	23	22	42.5	27	25	23	74	90	72	hsa_circRNA_404803		25070500	chr10	-	103862116	103865001	intergenic			AACAACTGAGGCTGCCTGGAGGATGAGATCTGGCCAGCCTGAAGGACATTTACCAGCCAA
ASCRP3000358	758	2003	1099	2373.5	901.5	10473	2450	10231	497.5	9516	6038.5	6285	hsa_circRNA_028826	hsa_circ_0028826	circBase	chr12	-	120600873	120622046	exonic	NM_006836	GCN1L1	AACAACTGGCCCAGGAAATGCTGATCATCTCCCACCACCCATCCTTAGAGATGCAGCCTC
ASCRP3000359	24	23	19	22	27	41	29	45	34	74	98	93.5	hsa_circRNA_100613	hsa_circ_0018611	circBase	chr10	+	70958127	70962799	exonic	NM_003171	SUPV3L1	AACAAGAAGCAGCCTTTTGTGTGTTCTTCACTGTTACAGGTTCGAGACTATAAGAGGCTT
ASCRP3000360	27	22	21	42	26	36	31	26.5	31	75	83.5	74.5	hsa_circRNA_008945	hsa_circ_0008945	circBase	chr14	-	51208299	51211083	exonic	NM_016350	NIN	AACAAGAAGTGATGTCTTTACATAAGCAACTTCAGAATGCTGGTGGCAAGCTGCACAGAT
ASCRP3000361	21	18.5	20	22	19	34	30	27	34.5	65	51	47	hsa_circRNA_005995	hsa_circ_0005995	circBase	chr1	+	150933038	150934634	exonic	NM_012432	SETDB1	AACAAGATGTCAGTGCAAAATCCTGACAGATGACTTTGCAGACAAGGAGGGTCTGGAAAT
ASCRP3000362	95.5	78.5	79	155	136	383.5	239	292	111.5	518	592	471	hsa_circRNA_404177		25242744	chr9	+	71668055	71679951	exonic	NM_000144	FXN	AACAAGCAAATCTGGCTATCTTCTCCATCCAGCTCTCTAGATGAGACCACCTATGAAAGA
ASCRP3000363	48	29	28.5	82	22	1388	376	1900	1180	3319	6281	3884.5	hsa_circRNA_100080	hsa_circ_0005782	circBase	chr1	-	21097422	21100103	exonic	NM_016287	HP1BP3	AACAAGCACTGAAAAGAGAATTAAATAGAGGAGTCATCAAACAGTGAGAAAGATCAGTCT
ASCRP3000364	25	19	16	23	22	47	30	37	31	117	169	135	hsa_circRNA_006238	hsa_circ_0006238	circBase	chr12	+	49888523	49893988	exonic	NM_023071	SPATS2	AACAAGCCTTTGCTGAATTGGAGAGCTGAACAAAAAGAAGAAAAACAAACCGAAACCTGC
ASCRP3000365	20	20	18	20	21	33	29	29	26.5	65.5	64	66	hsa_circRNA_017648	hsa_circ_0017648	circBase	chr10	-	7409610	7423911	exonic	NM_001018039	SFMBT2	AACAAGGTGTTGATGCCGCCGGACGGTAATTTTTTCTGCAGGATGAATTAAGAGAAGAGA
ASCRP3000367	34	39	28	42	37	35	121.5	133.5	228.5	90	97	92	hsa_circRNA_404643		25070500	chr1	-	204396775	204397348	exonic	NM_002646	PIK3C2B	AACAATAAACTCTTCATCATGGTGATGCATATTCGGGGCTTGTGTGATTTGGTGTACACC
ASCRP3000368	31	33.5	30	24	25	65.5	37	26	39	125	210.5	143	hsa_circRNA_002971	hsa_circ_0002971	circBase	chr6	+	158288578	158296208	exonic	NM_016224	SNX9	AACAATCACCAGGCTCGGGTTATGTATGATTTTGCTGCTGAACCTGGAAATAATGAACTG
ASCRP3000369	19	25	21	21	18.5	43	28	36	34	71	90	71.5	hsa_circRNA_004350	hsa_circ_0004350	circBase	chr10	-	120832401	120833449	exonic	NM_003750	EIF3A	AACAATTCTAGAGTAGAGCGCCTGTACCATGATATTGCCCAGCAAGAATTTCTTGAGGTT
ASCRP3000370	19	19	19	19	19	45	28	30.5	21	69	64	58	hsa_circRNA_103663	hsa_circ_0070022	circBase	chr4	-	76885287	76903190	exonic	NM_018115	SDAD1	AACAATTTTGTTACCGACAAGAACTCTGGAGAAGTCATGACAGTAGGTTTCTACAGCAGT
ASCRP3000371	60.5	52	21	20.5	21	406	159	62	90	401	710	487.5	hsa_circRNA_008134	hsa_circ_0008134	circBase	chr10	+	26994214	27009288	exonic	NM_014317	PDSS1	AACACACAGTTAATAAGATCTGGGGTGAAAAGAAGGTTTCATCACACAACCCCAGACAGT
ASCRP3000372	93	89.5	95.5	101	95	334	97	84	80	326	556	372	hsa_circRNA_044014	hsa_circ_0044014	circBase	chr17	-	42155867	42161222	exonic	NM_005474	HDAC5	AACACAGCCCCAGGCCCCATCAGCCAGAAGATGTATGCTGTGCTGCCTTGTGGGGGCATC
ASCRP3000373	37	29	30	44	46	44	34	27	35.5	82	77	75	hsa_circRNA_102491	hsa_circ_0008135	circBase	chr19	-	19049161	19049858	exonic	NM_004838	HOMER3	AACACAGTCTACGGCCTGGGCTTTGCCTCTGAACAGCATCTGACACAGGGGCCAAACCAG
ASCRP3000374	66.5	93	55	53	38.5	193	97	98	68	160	261	189	hsa_circRNA_040831	hsa_circ_0040831	circBase	chr16	+	88694029	88695262	exonic	NM_144604	ZC3H18	AACACATCCCCAGACCGAGGTCCCTGAGCGTGAGCAGCGTCTCCTCAGTGTCCAGTGCTA
ASCRP3000375	20	19	20	22.5	23	46	27	21	20	88.5	136	99	hsa_circRNA_007239	hsa_circ_0007239	circBase	chr7	-	130737183	130738224	intronic	uc011kpk.2	FLJ43663	AACACCCTGTAACAGCTGAAAGAAAATACCAATGAATCAATATTAGGAGACAGAAGCTGT
ASCRP3000376	54	31	23.5	48.5	49	44	45.5	76	50	76	91.5	86	hsa_circRNA_044904	hsa_circ_0044904	circBase	chr17	+	58008982	58022879	exonic	NM_003161	RPS6KB1	AACACCTGTCAGCTTTTACTTGGCAGAAATCTCCATGGCTTTGGGGCATTTACATCAAAA
ASCRP3000377	23	23	24	22	23	55.5	30	25	28.5	138	96.5	84	hsa_circRNA_104839	hsa_circ_0087643	circBase	chr9	-	99301359	99304174	exonic	NM_003671	CDC14B	AACACTATGAAAGATGCTGCCTATGGAAGTTGCAATTTCTACATTACACTTCTTGACTGT
ASCRP3000378	27.5	22	18.5	27.5	35	51	30.5	28.5	33	95	132.5	99	hsa_circRNA_103462	hsa_circ_0007841	circBase	chr3	+	127778944	127779504	exonic	NM_013336	SEC61A1	AACACTGGCCGAGTATTTGGCATGATCATTACTATCGGCCAGTCTATCGTGTATGTGATG
ASCRP3000379	19	22	19	18	19	39.5	27	47	35	74	144	97.5	hsa_circRNA_005208	hsa_circ_0005208	circBase	chr7	+	92932771	92963509	exonic	NM_017667	CCDC132	AACAGAATACAAGAAAGCCTTATTGATCTAAACACGGCTCGATGAACTGAGAATGTTCTT
ASCRP3000380	26	25	21	26	28	31.5	32	66	43	63	58.5	55.5	hsa_circRNA_401601		25242744	chr16	+	47703125	47723086	exonic	NM_000293	PHKB	AACAGAATGGAAGGTAACTCTGGGTGCCTTTGGGCATGAAGAAGAAGTTATCTCTAATCC
ASCRP3000382	43	39.5	32	27.5	30	55	40	32	40	84	84	71.5	hsa_circRNA_052254	hsa_circ_0052254	circBase	chr19	+	56111729	56114504	exonic	uc002qlk.1	ZNF524	AACAGACCCTTGGAGGCAGGGGCTGTGGAAATAAATCTCTGCCTGCTGGCCCCGCGCGCG
ASCRP3000383	40	51	66.5	50	48	143.5	49	57	43.5	254	378	265	hsa_circRNA_405143		25070500	chr13	-	45910670	45911523	sense overlapping	NM_003295	TPT1	AACAGACTAGAGCCTGCAAGTTTGCCAGCCCCTGATTTAAAAGATGAAGTAACAAATGTG
ASCRP3000384	15093	5676	5252	6147.5	2120	14841.5	39538	17466	12966	19463	28582	20087	hsa_circRNA_000166	hsa_circ_0000512	circBase	chr14	-	20811282	20811436	sense overlapping	NR_002312	RPPH1	AACAGACTCACGGCCAGCGAAGTGAGTTCAATGGCTGAGGTGAGGTGAGTTCCCAGAGAA
ASCRP3000386	26	25	21	26.5	21	552	64	125	144	860	2179	1420	hsa_circRNA_400659		25242744	chr10	-	119078382	119100613	exonic	NM_173791	PDZD8	AACAGAGGAGTTCTATTAAGACGGTTTAAGCCGTTTTTTCCATACCAGACCTTGCAAGGA
ASCRP3000388	25	25	23	26	26	109.5	45	60.5	57	169	320	204	hsa_circRNA_104450	hsa_circ_0002747	circBase	chr7	+	102994367	102996240	exonic	NM_002803	PSMC2	AACAGCCTTTACAGGTTGCCAGCTCTGGATGAGGGGGATATTGCCTTGTTGAAAACTTAT
ASCRP3000389	22	20	21.5	26	27.5	68.5	40.5	113.5	55	221	319	224	hsa_circRNA_102517	hsa_circ_0005325	circBase	chr19	+	34921480	34925873	exonic	NM_005499	UBA2	AACAGCTGGGTATCTTGGACAAGTAACTACTATCAAAAAGATTGATCTGGATACTATTGA
ASCRP3000390	31	25.5	24	51	54	68	45	129	60	186	270	208	hsa_circRNA_062439	hsa_circ_0062439	circBase	chr22	-	22142545	22162135	exonic	NM_002745	MAPK1	AACAGGCTGTTCCCAAATGCTGACTCCAAAGCTCTGCTTATGATAATGTCAACAAAGTTC
ASCRP3000391	40	23	24.5	26	22	44	94	828	183	79	91	69	hsa_circRNA_079614	hsa_circ_0079614	circBase	chr7	+	24613084	24708279	exonic	uc003swx.3	MPP6	AACAGGTTCATAGTATTGAATCCCACTAGATTTGGAACTACGGTGCCATCAACTACGAGC
ASCRP3000392	89	52	50	50.5	37	114	101	150	140	147	139	124.5	hsa_circRNA_002084	hsa_circ_0002084	circBase	chr19	+	49416267	49416821	exonic	NM_006184	NUCB1	AACAGGTTTAACCCCAAGACCTTCTTCATACTGCATGGCCACCCGGGACCTTGCCCAGTA
ASCRP3000393	18	19	20	19	18	50	32	37	27	125	148	121.5	hsa_circRNA_405399		25070500	chr15	-	77576224	77578846	exonic	ENST00000567337	PEAK1	AACAGTAACAAAGAGGAAAAGAATACTTGAGATCCATTTGTAAGGAAAGAAAAGGAAGCA
ASCRP3000396	20	23	20	28	22	46.5	33	223	58	69	101	84	hsa_circRNA_100224	hsa_circ_0012421	circBase	chr1	-	51860052	51866625	exonic	NM_001981	EPS15	AACAGTTGTTGCAGCAAGCGATTCAGGTGATCCTTTCAAGGATGATCCTTTTGGAAAAAT
ASCRP3000397	38	38	24.5	29	24.5	180	41	54	54	271.5	471.5	351	hsa_circRNA_100837	hsa_circ_0022537	circBase	chr11	-	62594626	62595103	exonic	NM_003164	STX5	AACATATATCATCAAACAGAATGGAATCCAGACAAATAAGCCAGCTTTGCGTGCTGTCCG
ASCRP3000398	45.5	54	54	42	34	119.5	69	200	148	219	302	219.5	hsa_circRNA_103339	hsa_circ_0005870	circBase	chr3	-	47079155	47088111	exonic	NM_014159	SETD2	AACATATGATGAAAACCCCATGAAGAGTTATGCCCAGCCAAGTCTTCAGTATATCCAGGG
ASCRP3000400	24	21	19.5	19	19	68	27	46	31.5	74	116	89.5	hsa_circRNA_406603		25070500	chr5	-	54562965	54566534	exonic	NM_019030	DHX29	AACATCACTGTTAACCCTAGAGGTACCATGAAAGCAGTCAGATGAGTTCTTTGGTGGAGA
ASCRP3000402	20	24	20	23	19	49	31	50	41	98	137	96	hsa_circRNA_101526	hsa_circ_0035403	circBase	chr15	-	56434975	56471501	exonic	NM_022841	RFX7	AACATCCGGAGACTTCACTGCCCAAACAGGAAGTCTATGATGAGTACAACAAAACTGTAC
ASCRP3000403	39	36.5	41	51.5	55	98	39	36	36	174.5	163.5	131	hsa_circRNA_000010	hsa_circ_0000263	circBase	chr10	+	125120834	125121663	exonic	ENST00000448347	RP11-282I1.1	AACATCCTTTTGGCCTCACCCAATGACCTGGCTGAAGAAGAGCCCAAGGACCGTAGCAAG
ASCRP3000406	48	105	108.5	36	25	65	65.5	60	59.5	1306	162.5	382	hsa_circRNA_092392	hsa_circ_0000368	circBase	chr11	+	128628009	128638167	exonic	NM_002017	FLI1	AACATGACCACCAACGAGAGGAGAGTCATCGTCCCCGCAGGAGGCTCTGTCGGTGGTGAG
ASCRP3000407	27	22	23	24.5	32	47	33	20	21	83	66	71	hsa_circRNA_062160	hsa_circ_0062160	circBase	chr22	+	17976434	17984048	exonic	NM_001290046	CECR2	AACATGATCGCCCAGAAGGCCTCAGACATTCCACAGCTACCTAGAGGACATCATCAACTA
ASCRP3000408	30	24	23.5	27.5	26	210.5	29.5	27.5	37	145.5	172	143	hsa_circRNA_102245	hsa_circ_0046448	circBase	chr17	+	80714040	80755678	exonic	NM_005993	TBCD	AACATGGAAAACGTGAAGACTGTTTGCCCTATGTAATAATGGACAAATACCAGGAGCAGC
ASCRP3000410	23	20	22	23	23	233	46	150.5	82	530.5	1028	754.5	hsa_circRNA_405119		25070500	chr13	-	21729831	21732264	exonic	NM_145061	SKA3	AACATGGACAGAACATCCGAGATGTCAGCAACAAAGAAAACTGGTATCCACAAATTACCC
ASCRP3000411	60.5	42.5	38	100.5	103.5	67	57	68	63	115	93.5	70	hsa_circRNA_002953	hsa_circ_0002953	circBase	chr21	-	11011437	11029717	exonic	uc002yis.1	TPTE	AACATTCAAGGGATGGTGATATGGATGATAGTCGAGGAGGCTTGGAGTACCCATAATACA
ASCRP3000413	18	21	18	19	20	43	26	27	29	75	73	66	hsa_circRNA_038480	hsa_circ_0038480	circBase	chr16	+	21985216	21994668	exonic	NM_003366	UQCRC2	AACATTCTGTTTAAGTTTCTGCATTTAATGCCAGTTACTCAGATTCTGGACTCTTTGGGA
ASCRP3000414	21	21	18	24	20	34	32	41	37	99.5	130	97	hsa_circRNA_406905		25070500	chr7	+	6175471	6180615	exonic	NM_032172	USP42	AACATTGGAGATAAAGGTCATGCAGAAGGCTTTTGTATGATGTGTACAATGCAAGCACAT
ASCRP3000415	25	21	17	22	20	336	40.5	171	120	582	992	706.5	hsa_circRNA_103029	hsa_circ_0059955	circBase	chr20	+	33057852	33059320	exonic	NM_031483	ITCH	AACATTGTTTGAGGATTCCTTTCAACAGAGACAATGGACCTCAGATAGCCTATGTTCGGG
ASCRP3000416	32.5	21	19	31	33	78.5	27	27	24.5	109	198	137	hsa_circRNA_031830	hsa_circ_0031830	circBase	chr14	-	50647289	50667802	exonic	NM_006939	SOS2	AACATTTCAATAAATTGATGGCCAGACCTGCAGTTGCTCTACACTTTCAGGAGCGAGTTC
ASCRP3000417	29.5	23	21.5	30	38	81	31	32	26	134	196.5	124.5	hsa_circRNA_031831	hsa_circ_0031831	circBase	chr14	-	50647289	50671127	exonic	NM_006939	SOS2	AACATTTCAATAAATTGATGGCCAGACCTGCAGTTGCTCTACACTTTCAGGTTCAGGAAC
ASCRP3000418	171	99	84	252.5	173	175	128	72	101	190	182	162.5	hsa_circRNA_101089	hsa_circ_0027261	circBase	chr12	+	57891939	57892406	exonic	NM_004990	MARS	AACATTTCGTTTGATATTTTTGGTCGCACCACCACTCCACAGCAGACCAAGTTGCCTGTG
ASCRP3000419	55	51	42	52	64	106.5	146.5	532	231	494	883	467	hsa_circRNA_009181	hsa_circ_0009181	circBase	chr1	-	667396	678730	exonic	uc002khh.3	LOC100133331	AACATTTGGAATTTTCGTATACGTGGATTCTAGAGGGGTGACAGCGAAACCTGGATCTAC
ASCRP3000421	54.5	56	72.5	136	100.5	274.5	71	42	40	372.5	263	260.5	hsa_circRNA_103845	hsa_circ_0072568	circBase	chr5	-	58476420	58511794	exonic	NM_006203	PDE4D	AACCAACCATCCATCAACAAAGCCACCATAACAGTTTTGATGTGGACAATGGCACATCTG
ASCRP3000422	158	166	161.5	338	243.5	3593.5	516	3625	2175	9198	14050.5	9279	hsa_circRNA_102984	hsa_circ_0006117	circBase	chr20	+	2944917	2945848	exonic	NM_002836	PTPRA	AACCACTCCAGAAACTTTCCCTCCTTCAGATAAGCATGGATTCCTGGTTCATTCTTGTTC
ASCRP3000423	102	77	137	306	210.5	2321	218	1850	862	5885	8696	6932	hsa_circRNA_001126	hsa_circ_0001126	circBase	chr20	+	2903852	2945848	exonic	NM_002836	PTPRA	AACCACTCCAGAAACTTTCCCTCCTTCAGGTGACACAACTAAAAAAAAACAAAGGTATTT
ASCRP3000424	46	115	170.5	56.5	47	108	168	611	318.5	255	288	182	hsa_circRNA_100499	hsa_circ_0004039	circBase	chr1	+	236969443	236979843	exonic	NM_000254	MTR	AACCACTCTGGAATACTTGCTGGCTGGGGCAGATATCATTGAAACAAATACTTTTAGCAG
ASCRP3000426	21	22	19	26	22	51	34.5	42	39	120	173.5	119	hsa_circRNA_404337		25242744	chrX	-	20211604	20213263	exonic	NM_004586	RPS6KA3	AACCAGAAAATTCGAGACCGAGTTCGGACAAAAATGGAACGTGATATCTTGGTAGAGGTT
ASCRP3000428	21	21	20	22	21	65.5	34	46.5	46.5	130	227	152	hsa_circRNA_005432	hsa_circ_0005432	circBase	chr9	+	91943574	91943801	exonic	NM_024077	SECISBP2	AACCAGCTGCAGTGTTATCAAAGATGGTTACCATAAGCGAACAGACAGGAAATCCAGAAT
ASCRP3000429	23	19	22	22	24.5	34	47	28.5	43	76	66.5	53	hsa_circRNA_100735	hsa_circ_0020749	circBase	chr11	+	1000431	1003804	exonic	NM_012305	AP2A2	AACCAGCTGCTTCAAATTGGACTTAAGTCTGAATTTCGGCAGAATTTAGTCTACGCCTTC
ASCRP3000430	24	24	21	26.5	30	97	37	66	34	134	312.5	186	hsa_circRNA_104191	hsa_circ_0077913	circBase	chr6	-	135679269	135716034	exonic	NM_017651	AHI1	AACCATCAGGTAGATACAGCACCAACGGTCAACAAAAATCTCTCATTTACTTCACCACCA
ASCRP3000431	28	21	19	26	31	32.5	31	22	28.5	67	57	58	hsa_circRNA_406216		25070500	chr3	-	4344838	4346286	intronic	ENST00000448413	SUMF1	AACCATGTAAGATGAAGAAACTCAGGCTCTGGGAAGTAGCTAAGATGTCTAAGCTCCGAA
ASCRP3000433	208	333	155	203	103.5	2159	410	579	207.5	2184.5	1584	1773	hsa_circRNA_401976		25242744	chr18	+	55398645	55399255	exonic	uc002lgv.1	LOC100505549	AACCATTCAGTACTGATTAAATGCTTGGAACTTGTCAGATATGCTCTCCCAGCCCTTCTT
ASCRP3000434	23.5	27	23	24.5	23.5	79.5	35.5	85.5	57	128	154	116	hsa_circRNA_022382	hsa_circ_0022382	circBase	chr11	+	61605249	61608197	exonic	NM_004265	FADS2	AACCCAAGTGGAACCACCTTGTCCACAAATTCGTCATTGGCCACTTAAAGGATGCCTTCC
ASCRP3000435	31	29	27	47.5	58.5	89	45	108	77.5	216	301	213.5	hsa_circRNA_102618	hsa_circ_0052612	circBase	chr2	-	10784445	10794673	exonic	NM_024894	NOL10	AACCCCCAAGATGGGCATCTATTACATTCCAGGAAAAATATTTACTTCCTTGGAGCCAGA
ASCRP3000436	30	23.5	22	48	34	104	40	82	28	120	124.5	115.5	hsa_circRNA_100576	hsa_circ_0018037	circBase	chr10	+	27458872	27460012	exonic	NM_032844	MASTL	AACCCCTACTCAAAAAAGAAGATCCTGTATGCCACATCAGGAAAGTGATGAAGCATTGGG
ASCRP3000437	27	25	24	25	26.5	67.5	33	27	30	93.5	105.5	102.5	hsa_circRNA_005303	hsa_circ_0005303	circBase	chr1	-	41651792	41660071	sense overlapping	NM_012236	SCMH1	AACCCCTAGACCGGTTTTTAGTCCATTGACTATGCAGCCTAATGATTTCTACATCGTACT
ASCRP3000438	2124	3564	1718	1193.5	622.5	13040.5	2199.5	2562	1784.5	8497	12702.5	10135	hsa_circRNA_043650	hsa_circ_0043650	circBase	chr17	+	39845126	39847898	exonic	NM_005801	EIF1	AACCCTTATTTAAATAAAACTTGTTTTCAGAAATACCGCCCCTCTGCCCCAGTCACTGAG
ASCRP3000439	313	559	662	1213	539.5	4540	456.5	1597.5	412	4331	5324	4293	hsa_circRNA_007011	hsa_circ_0007011	circBase	chr2	+	181846744	181848820	exonic	NM_006357	UBE2E3	AACCCTTGATCCTCCTCCTAATTGCAGTTTTCCAAGAGATAACTTCACCAAGATGTCCAG
ASCRP3000440	59	58	44	50	38	232.5	120	238	192	235	508	343	hsa_circRNA_100808	hsa_circ_0003110	circBase	chr11	-	46529740	46534363	exonic	NM_017749	AMBRA1	AACCGACTTGGAATTTGAGGACTTTGAGAGGCTGCTGGAATCTTCCCTCATTTCATTATC
ASCRP3000441	49	35	37	69	46	256	160	527	407	366.5	750	550	hsa_circRNA_101904	hsa_circ_0040827	circBase	chr16	+	88066714	88071617	exonic	NM_017869	BANP	AACCTCCAGATCCATCACGTGGGGCAGGACGGTCAGAGCCGATGATGAGCACCCCACCTC
ASCRP3000443	79	76	67	69	63.5	394	61.5	51	62	494.5	531	384	hsa_circRNA_101661	hsa_circ_0037078	circBase	chr15	+	101550654	101551042	exonic	NM_024652	LRRK1	AACCTGAAGGTGTTTCCAGATCCCTGGGCCTGCCCTTTGGCTACTTGAAATTGACATTTC
ASCRP3000444	50.5	53	49	57.5	43	202	766	7810	3575.5	1048	2816	1587	hsa_circRNA_092498	hsa_circ_0001104	circBase	chr2	+	227729319	227729842	exonic	NM_032276	RHBDD1	AACCTGACTTCAAAAGGAGCTGTGCTGTAGGTTTCTCAGGTTCAGCCGTCTGTATATCTC
ASCRP3000445	40	35	31.5	32	29	258	43.5	33	53	256	434	283	hsa_circRNA_039400	hsa_circ_0039400	circBase	chr16	+	53907697	53968021	exonic	NM_001080432	FTO	AACCTGAGGAGAGAATGGCATGCCAGATGATCTCAATGCCACCCACCAACACTGTGTTTT
ASCRP3000446	31.5	27	20	30	30	41	30.5	19	22	70	57	46	hsa_circRNA_100757	hsa_circ_0021110	circBase	chr11	-	8832793	8860897	exonic	NM_005418	ST5	AACCTGGACAGGCAGCAAGATTTCACACCCTTTGGAGAGTTTCTTTCTTGGATAATTCAG
ASCRP3000447	51	35	34	89	72	99	73	163.5	116.5	403	528	355	hsa_circRNA_009068	hsa_circ_0009068	circBase	chr17	+	45668082	45682918	exonic	NM_006310	NPEPPS	AACCTGGAGAAGGAATGGTGGACTCATCTTTGGTTAAATGAAGGTTTTGCATCCTGGATT
ASCRP3000449	24	24	24	24	20	321	68	129	119	643	1216	755	hsa_circRNA_003673	hsa_circ_0003673	circBase	chr4	-	107216250	107230146	exonic	NM_033115	TBCK	AACCTGTGAGATTATCTTAGAAGACCTAGGACTCCAAAAATGTTTCCCCTGAAGGACGCT
ASCRP3000451	40	31	31	55	55	131.5	44	27	31	236	293.5	239.5	hsa_circRNA_102951	hsa_circ_0058805	circBase	chr2	+	236706402	236708166	exonic	NM_014914	AGAP1	AACCTGTTCACCTTGCCCAGAAGATTGTTGCCACAAGGAAGAAGCAGCAGCTGTCCATAG
ASCRP3000452	27.5	30	21	26	30	30	63	61	53	80	84	65.5	hsa_circRNA_011898	hsa_circ_0011898	circBase	chr1	+	40872407	40882768	exonic	NM_022733	SMAP2	AACCTTACTCAGGGCCGCGATGGGCCTCTTGGAACATTGGTGTGTTCATCTGCATTCGAT
ASCRP3000453	23	20	21	26	30	155	48	162	102	263	404	226.5	hsa_circRNA_043285	hsa_circ_0043285	circBase	chr17	+	35804797	35822225	exonic	NM_001488	TADA2A	AACCTTAGAAAGTTTCAATGAATTTGACAATTATGCAGAATGGGACTTGAGAGACATTGA
ASCRP3000454	71	45	48.5	122	107	357	43	35	46	366	388	331	hsa_circRNA_104924	hsa_circ_0008240	circBase	chr9	+	129102786	129157976	exonic	NM_033446	MVB12B	AACCTTCCCAGGACCAGTCCACCATGCCTGAAGTCAAAGACCTCTCAGAAGCCTTGCCAG
ASCRP3000455	50	28	26	53	26	536	246	1434	490	979	1887	1100.5	hsa_circRNA_104531	hsa_circ_0001771	circBase	chr7	+	155457868	155473602	exonic	NM_053043	RBM33	AACCTTTAGATGAATTTACAATGATGACTTTGACCAGTTTGATAAGCCTGGCGCGGAACG
ASCRP3000459	27	28	23	23	20.5	50.5	91	281.5	92	151.5	180	120	hsa_circRNA_075671	hsa_circ_0075671	circBase	chr6	+	15374347	15410596	exonic	NM_004973	JARID2	AACGATGTTAGTTCTTCAGATTTTGAAGAAGGGCCGTCGAGGAAAAGGATGACAGTGATG
ASCRP3000460	53	38	34	36	32	563	68	81	71	285	760	486.5	hsa_circRNA_101914	hsa_circ_0041019	circBase	chr16	-	89824984	89833645	exonic	NM_000135	FANCA	AACGCACTGATGGATTTCCACCAAAGATTTTGTACAGCAGCAATTTCTTACTCTCTCTGC
ASCRP3000461	39	24	27	52	53	86	32	31	34	206	316	241	hsa_circRNA_100568	hsa_circ_0017979	circBase	chr10	-	24880815	24883968	exonic	NM_020824	ARHGAP21	AACGCTCATCCAGCACATTCACGATTTGCCTGAACATCATTATGAAACACTTAAGTTCCT
ASCRP3000463	43	25	24	38	31	79.5	68	119	144	168	478	311.5	hsa_circRNA_104403	hsa_circ_0080628	circBase	chr7	-	74239461	74251505	exonic	NM_173537	GTF2IRD2	AACGGAAATACTCAGGAAGGCAGTGGAGGACTATTTCTGCTTTTGTTATGGGATCATGGC
ASCRP3000464	21	25	22	24.5	23.5	40.5	45	36	37	122	122	106	hsa_circRNA_004087	hsa_circ_0004087	circBase	chr16	-	80718434	80719026	exonic	NM_152342	CDYL2	AACGGGCTCGGTTGAAAGGATTGTAGACAAGAGGAAGAACAAGAAAGGAAAATGGGAGTA
ASCRP3000466	64	49	18	16	20	39	74	123.5	60	65	57	50	hsa_circRNA_100662	hsa_circ_0006654	circBase	chr10	+	102683731	102685776	exonic	NM_018121	FAM178A	AACGTCTAGTGAAGGAAATGGAAGACACACAAAGCAGGCTCTAAGCAGAATAAATTCCCT
ASCRP3000467	93	64.5	65	53	25	214	798	682	220	648	696	600.5	hsa_circRNA_001062	hsa_circ_0001062	circBase	chr2	+	113057425	113057606	exonic	NM_198581	ZC3H6	AACGTGAGAAACATAAGAGAAGATGGCGAATTAGAAGATGGTGAAATAGACGATGCAGGA
ASCRP3000469	40.5	36	32.5	31.5	30	215	40	34	32.5	314	353.5	254	hsa_circRNA_035861	hsa_circ_0035861	circBase	chr15	+	65223019	65226434	exonic	NM_182703	ANKDD1A	AACGTGGTTGATCATGAGGGGAACACTGCCCTTCATCTGGCTGCTGGTCGGGGCCATATG
ASCRP3000470	52	34.5	34	58.5	60	356	84	122	128	512	1263	859	hsa_circRNA_103990	hsa_circ_0003967	circBase	chr5	+	151169883	151170623	exonic	NM_005754	G3BP1	AACGTTTGTCCTTGCTCCTGAGATTTTATGGAAAGAACTCTTCTTATGTCCATGGGGGAT
ASCRP3000472	21	22	19	29	32	45	30	23	25	69	94	75	hsa_circRNA_059847	hsa_circ_0059847	circBase	chr20	-	31946646	31962018	exonic	uc002wzc.2	CDK5RAP1	AACTAAGGTTGTTCTGCAGCTGATTCATGAGAGAGATAACATCTGTAAACAGATCCACCT
ASCRP3000473	31	31.5	27	40	32	255	49.5	77	75	458.5	769	417.5	hsa_circRNA_005593	hsa_circ_0005593	circBase	chr5	+	52899281	52900725	exonic	ENST00000502423	NDUFS4	AACTAATCCTGAGGACTTCATCCGGTCACCATCTACCTATTCTTCAAATGGTCGTTGAGG
ASCRP3000474	184	174.5	149	254	187.5	1021	167	178.5	141	938	1011	857	hsa_circRNA_061343	hsa_circ_0061343	circBase	chr21	-	27347382	27369731	exonic	NM_000484	APP	AACTACATCACCGCTCTGCAGGCTGTTCCTCCTCGGTGTCCCAAAGTTTACTCAAGACTA
ASCRP3000475	27	34.5	32	28	27	75	52	58	37	96	101	91.5	hsa_circRNA_061900	hsa_circ_0061900	circBase	chr21	+	45165959	45172510	exonic	NM_003681	PDXK	AACTACCTGATTGTGCTGGGGAGTCAGAGGAGGATGTGTGATCCAGTCTTGGGTGACAAG
ASCRP3000476	28	28	27	28	24	55	107	540	297	161	178	161	hsa_circRNA_087856	hsa_circ_0087856	circBase	chr9	+	110062421	110084399	exonic	NM_002874	RAD23B	AACTACGACAGCAACAACTACAACAACAAGTTCTGGAGGTGAAAGCACTGAAAGAGAAGA
ASCRP3000477	29.5	22	20.5	22	23.5	34	31	69	53	73	75	71.5	hsa_circRNA_406327		25070500	chr3	-	114069116	114070725	intronic	ENST00000479879	ZBTB20	AACTACGTCAAGCACATGTTCGTACACACAGGTGAGTGACATCAGTTGCAAGGGGATGAC
ASCRP3000478	109.5	74	84	81	86	175	62	68	77	166.5	161	143	hsa_circRNA_100780	hsa_circ_0021569	circBase	chr11	+	32948702	32949669	exonic	NM_001076786	QSER1	AACTACTCTCTTACCACAATTCAGGGCTCCATCCTGGCAGACAGTTTAAGCTATGAAGAA
ASCRP3000479	21	22	19.5	23	20	32	28	24	30	80	68	71	hsa_circRNA_105023	hsa_circ_0002153	circBase	chrX	+	107083899	107097934	exonic	NM_012216	MID2	AACTAGAAAATCAAATGGCCAAACTAATACAGATCTGCCAGCAGGTTGAGGTGAAAGCCC
ASCRP3000481	41	34	33	51	43.5	127	54	63	50	193	257.5	207	hsa_circRNA_103563	hsa_circ_0008583	circBase	chr3	-	196817782	196846401	exonic	NM_004087	DLG1	AACTAGCCAGAAGCGATCCCTCTATGTCAGCTTCTTCTCAGCCTGTTGATAACCATGTTA
ASCRP3000482	30.5	31	26	28	23	45	56	47	57	92.5	123	87	hsa_circRNA_068465	hsa_circ_0068465	circBase	chr3	+	186504915	186505671	exonic	NM_001967	EIF4A2	AACTATATTCACAGGAATGGAAGTTGGATACACTTTGTGACTTGTACGAGACACTGACCA
ASCRP3000484	26.5	26	22.5	28	27	43	34	23	25	84	79	73	hsa_circRNA_406886		25070500	chr6	+	157469757	157471987	sense overlapping	NM_017519	ARID1B	AACTATGGCAACTCTCAGGCTCCCATGGTGCACCAGCCTGACCAGTACGGGTAACTACTC
ASCRP3000485	53	50	40	42	34	144	72	63	108	279	349.5	287	hsa_circRNA_002837	hsa_circ_0002837	circBase	chr19	-	41847787	41848152	exonic	NM_000660	TGFB1	AACTATTGCTTCAGGGGAAATTGAGGGCTTTCGCCTTAGCGCCCACTGCTCCTGTGACAG
ASCRP3000486	38	26.5	22	34.5	32	54	32	23	22	123	89	78	hsa_circRNA_058060	hsa_circ_0058060	circBase	chr2	+	216177220	216200847	exonic	NM_004044	ATIC	AACTATTGTGTCCTTCAGCCTTATTTAGTGTCTCTGACAAAACCGGCCTTGTGGAATTTG
ASCRP3000487	24	25	23	24	20	158	93.5	431	301	476	704	420	hsa_circRNA_101608	hsa_circ_0036408	circBase	chr15	-	76580186	76588078	exonic	NM_000126	ETFA	AACTATTTATGCAGGCCTCATTGCTACGATTTCAGAGTACCCTGGTAATAGCTGAGCATG
ASCRP3000488	46	38	36	34	32	283	52	52	97	616	721	628	hsa_circRNA_018758	hsa_circ_0018758	circBase	chr10	+	74474868	74644140	exonic	NR_073062	MCU	AACTCAAGGATGCAATTGCTCAGGTCTTTCACTACCATTCCTACAGTGATTGGCAAGATA
ASCRP3000489	22	22	21	22	23.5	47	34	36	44	95	98.5	81	hsa_circRNA_101754	hsa_circ_0038465	circBase	chr16	+	21973780	21983443	exonic	NM_003366	UQCRC2	AACTCAGCAGCCATTTGATTGTGACCGCAACAAGGGAAAACATGGCTTATACTGTGGAAT
ASCRP3000490	40	33	27	28	33	64	32	25	28	78.5	82	81	hsa_circRNA_022149	hsa_circ_0022149	circBase	chr11	-	57258696	57268516	exonic	NM_003627	SLC43A1	AACTCAGGGCACTGTCCTCGGAGATGCCAGTGCCTGCTTCACTGCGTCCTGCACCCTCAT
ASCRP3000491	53	271	137	34.5	31	321.5	182	242	175	193	263.5	205	hsa_circRNA_009044	hsa_circ_0009044	circBase	chr1	-	227213755	227223308	exonic	NM_003607	CDC42BPA	AACTCCATGGAATGGATTCAGACTCTTCCTCTCAAAAAGTGTGTGGATTCTCATGCCATA
ASCRP3000492	23	25	25	66	64	71	35	31	33	154.5	135	126.5	hsa_circRNA_403834		25242744	chr7	-	72863871	72865324	exonic	NM_032408	BAZ1B	AACTCCCGTGGCAGGTTGCATCTGCACTGGAGAAATGGAAGACAGCAATCCGGGAAGCTC
ASCRP3000494	28	28	25.5	30	34	50	34	34	32	94.5	81	74	hsa_circRNA_100740	hsa_circ_0006430	circBase	chr11	-	3712576	3716836	exonic	NM_016320	NUP98	AACTCTACAGTGACAGGGGATCATCGTCTTGCTCTTCTTTTATCTCAGTTTGTGGGTAGC
ASCRP3000495	181	102	83.5	421	76	79717.5	2243	8356.5	7552	115731	152150	115857	hsa_circRNA_102027	hsa_circ_0042961	circBase	chr17	+	30267304	30267505	exonic	NM_015355	SUZ12	AACTCTTACTTACATGTCTCATCGAAACTCCAGAACAAACATCAAAAGAGCCAACACAGA
ASCRP3000496	20	20	19	20	21	54	28	29	20	112	109.5	85.5	hsa_circRNA_404035		25242744	chr8	-	54682177	54684727	exonic	NM_015941	ATP6V1H	AACTCTTGAAAACTTTTTAGAAAAATCAACTGAAAGAGAAACTCGCCAAGAATATGCCCT
ASCRP3000497	35	26	22.5	44	27	1504.5	248.5	1777	1200	6635	10027	7891	hsa_circRNA_103740	hsa_circ_0001439	circBase	chr4	-	129913321	129925031	exonic	NM_144643	SCLT1	AACTGAACAAAGTGTGATAATCGAACAACTCCGAAAAAAACTTAGGTTGCACAGTGAATT
ASCRP3000498	28	22.5	18	25	24	223	36	76	107	555	1017.5	716	hsa_circRNA_102672	hsa_circ_0003195	circBase	chr2	+	32858942	32865477	exonic	NM_017735	TTC27	AACTGACAGCTATTCAGACAACAGTTGATATTTCTACTTGGTGTGAGCAGTTTGCAACTT
ASCRP3000499	20	22	21	21	24	35	31	26	23.5	84	77	57	hsa_circRNA_007468	hsa_circ_0007468	circBase	chr12	-	108136973	108140201	exonic	NM_012406	PRDM4	AACTGATGAAAATGAATGTAATTGGATGATGTTTGTGCGCAAAGCCAGGGTGTACTCTGT
ASCRP3000500	32	25	22	33	35	65	48	157	84	162	225	175.5	hsa_circRNA_103424	hsa_circ_0066642	circBase	chr3	+	100013930	100018175	exonic	NM_018309	TBC1D23	AACTGCTTTCCACTTAGATTCAGACCTGCTTGGAAGTCTTTTTGCATGTTACTGTTCCAC
ASCRP3000501	19	23	18	20	19	43	31	39	29	65	56	58.5	hsa_circRNA_003200	hsa_circ_0003200	circBase	chr14	+	74358729	74364965	exonic	NM_021188	ZNF410	AACTGGCAAAGAATGCAAAAACCAGCAGCAATGGTTACATTGATTACCCACCTAGTACAA
ASCRP3000503	28	25	24	23	19	65	48	47.5	47	101.5	134	96	hsa_circRNA_101406	hsa_circ_0000557	circBase	chr14	-	75576387	75577074	exonic	NM_033116	NEK9	AACTGTACACTTGGGTGAGAGATGGAGGAAAAAGTCACTCTGCTTAATGCACCTACAAAG
ASCRP3000504	25.5	21	21	31	35	394	54	133	76	999	2047.5	1441	hsa_circRNA_407149		25070500	chr9	-	5954015	5988545	exonic	NM_001017969	KIAA2026	AACTGTCATAAAGTCACCTACTGTACCAGAGTTTCAGGCACTTGAGAGAAAAGACAACGA
ASCRP3000507	23.5	26	23	29	29	38	32	43	38.5	96	89	80	hsa_circRNA_000224	hsa_circ_0000224	circBase	chr10	+	20436712	20466338	exonic	NM_032812	PLXDC2	AACTTCAAAGGCACAGCACTTGTGGTCCAGTGGGACCATGTACATCTCCAGGATAATTAT
ASCRP3000509	40.5	26	24	43	40	50	39	273	80	83	121	104	hsa_circRNA_083423	hsa_circ_0083423	circBase	chr8	+	17137883	17143936	exonic	NM_152415	VPS37A	AACTTCAGCAGGCGATAGCAATGCACAGCCAATTTCATGCTCCACTATAGTATGAATTAC
ASCRP3000510	22	23	22	20.5	23	45	39.5	135	76	88	115	87	hsa_circRNA_101335	hsa_circ_0031482	circBase	chr14	-	31596990	31641328	exonic	NM_015382	HECTD1	AACTTCCAGTGAGAGTGACACAGGTCAGGAAGCAGAATATTCCTTATATGCCTTTGAAGT
ASCRP3000511	45	79	58	22.5	23.5	73	56.5	33.5	55	79	92	82	hsa_circRNA_000859	hsa_circ_0000859	circBase	chr18	+	77208781	77211816	exonic	NM_006162	NFATC1	AACTTCCTGCAGGACTCCAAGGTCATTTTCGTGGAGAAAGCCCCAGCTGCATGGCTACTT
ASCRP3000512	19.5	22	17	19	21	50	32	48	35	91	114	91	hsa_circRNA_070829	hsa_circ_0070829	circBase	chr4	-	122754385	122756438	exonic	NM_018190	BBS7	AACTTGAAAGTACCTACAGATTCGCTCAATTGAAGGCCAGTATGGCACACTACAAGCATA
ASCRP3000513	198	1508	2492	2078.5	1364.5	292	2473	6409	813	1140.5	1768.5	712.5	hsa_circRNA_103361	hsa_circ_0001296	circBase	chr3	-	47719687	47727660	exonic	NM_003074	SMARCC1	AACTTGACTGGAGATGTGTGTGCTGTGATGAGGAAGATGAAGATCCTGCCAAAGGTGATC
ASCRP3000514	35	27	25	29	30	39	36	41.5	30	83	70	67	hsa_circRNA_405928		25070500	chr2	-	95814629	95819004	sense overlapping	NM_032788	ZNF514	AACTTGTACTGGAGAGAAATCCTACAAGTGTGGACCTGATGACATTTGAAGATGTGGCTG
ASCRP3000515	125.5	134	112	163	113	710.5	1080	10525	4707	2196.5	4929	2975	hsa_circRNA_102927	hsa_circ_0058493	circBase	chr2	+	227729319	227732034	exonic	NM_032276	RHBDD1	AACTTGTGGCTATTCATTTATTCTCACCAGGGTTCAGCCGTCTGTATATCTCCCCAGATA
ASCRP3000516	28	21	20	24	30	100	34	65	62	233.5	249	233.5	hsa_circRNA_406694		25070500	chr5	-	145083537	145083858	intronic	ENST00000510259	PRELID2	AACTTTAACCACAAAACCTGCTTCTGAACCAACTGAGGAAGACACCTCAGGTTGCAGCTG
ASCRP3000517	90	79	80	128	104.5	162	256	197.5	231	338	409.5	314	hsa_circRNA_001526	hsa_circ_0001526	circBase	chr5	-	131822730	131823714	sense overlapping	NM_002198	IRF1	AACTTTCGCTGTGCCATGAACTCCCTGCCAGATATCGAGGAGGAGATGATCTTCCAGATC
ASCRP3000519	46	56	43	22.5	25	33	45	35	55	61	50	46.5	hsa_circRNA_048410	hsa_circ_0048410	circBase	chr19	-	2428163	2431900	exonic	ENST00000325327	LMNB2	AACTTTTTTGTACAACACTCCAATAAACATTTTGATTTTAGTGTGGGCAGCTGGTGCGGG
ASCRP3000520	27.5	30.5	24	26	31	54	39	55.5	47	83	139.5	109.5	hsa_circRNA_018634	hsa_circ_0018634	circBase	chr10	-	71913593	71921687	exonic	NM_020150	SAR1A	AAGAAAAACTCCGTGAGATATTTGGGCTTTATGGACAGACCACAGGAAAGGTAGTAAGCA
ASCRP3000521	67.5	60	50	73	71	138	68.5	36	45	292	222.5	165	hsa_circRNA_406730		25070500	chr6	-	1099947	1101761	sense overlapping	NR_027115	LOC285768	AAGAAAAATGAAAGGGTCCTGCCTACCCATCTGAGGACATGTCTGCTCATCACCCATGTG
ASCRP3000522	60	64.5	71	79.5	72	109	80.5	77	60	179	144.5	117	hsa_circRNA_405841		25070500	chr2	+	28210859	28218323	sense overlapping	NM_004899	BRE	AAGAAAAATGTTTACAGGGTCTGGCCCCCGCTTCATAAACAGGGGGATATCATTTTCAAT
ASCRP3000523	24	22.5	20	24	25	52	31	47.5	48	180	174.5	119	hsa_circRNA_005585	hsa_circ_0005585	circBase	chr5	+	43675612	43704502	sense overlapping	NM_012343	NNT	AAGAAAACATGTGACGCGCTCCAGGCGAAAGTTAGAGAATCCTATCAGAAGCAATGAATC
ASCRP3000524	20	22	19	20	21	48	34	65	55	117	196	138.5	hsa_circRNA_004580	hsa_circ_0004580	circBase	chr20	-	13539654	13568017	exonic	NM_017714	TASP1	AAGAAAAGAAGACAATCAAGTGAGAAGGATTCTCCTTTTACAAATGCAGGAATGGGATCT
ASCRP3000525	26	30	27	29	24	62	47	159	93	159	147.5	142	hsa_circRNA_001985	hsa_circ_0001985	circBase	chr3	-	33450727	33467233	exonic	NM_014517	UBP1	AAGAAAAGTATCAGCCGTCCTATGATACCACAATCCTCACAGAGTGATGTCTTGGCATTG
ASCRP3000526	21	20	20	19.5	20.5	52	30	46	40.5	122	140	117	hsa_circRNA_092566	hsa_circ_0001678	circBase	chr7	+	8043537	8099878	exonic	NM_138426	GLCCI1	AAGAAAATAATGGGAAGGAAGAAGTATCCAAGCGGACAAGGCAAAATCTCAGCAAGTTCG
ASCRP3000527	22	26	24	22	26	81	36	46	32	139	189	139	hsa_circRNA_104672	hsa_circ_0003304	circBase	chr8	-	103850971	103855975	exonic	NM_015878	AZIN1	AAGAAAATTGCACGTAATCACCCAAATGCCAATTTGTTGCATATTCTAAGGACCCAGACA
ASCRP3000528	26	25	20	26	31	90	40	58	71	291.5	487	325	hsa_circRNA_015524	hsa_circ_0015524	circBase	chr1	-	180953812	180957481	exonic	NM_005819	STX6	AAGAAACTTGCAAAAGTATCTCATATGACCAGTGTTGATCGTGGAACAGCAGGATGAGCA
ASCRP3000529	23	23	21.5	25	27	90	32	45	42	161.5	379	230	hsa_circRNA_092436	hsa_circ_0000709	circBase	chr16	+	67660457	67663436	exonic	NM_006565	CTCF	AAGAAAGAAGATTCCTCTGACAGTGGTGTCCACTTGCGAAAGCAGCATTCCTATATTGAG
ASCRP3000530	34	30.5	39.5	37.5	34	51	47	39	34	82	76	82.5	hsa_circRNA_407079		25070500	chr8	+	61653817	61693989	exonic	NM_017780	CHD7	AAGAAAGCAAAAACTGCCACGCCAAAACCCAAATCCAGCAAAAAGTCAAGGACCTATATC
ASCRP3000531	26	27	23	26	26	37	32.5	41	44	119	170	140.5	hsa_circRNA_104210	hsa_circ_0007828	circBase	chr6	+	147581750	147588303	exonic	NM_139244	STXBP5	AAGAAAGCCGACTACAGATACACATATGATGAGGGTTACATTTTGCCATCTGCCTTTCCA
ASCRP3000532	35	29	23.5	40	42	35	31	21	25	62	57	57	hsa_circRNA_104782	hsa_circ_0087071	circBase	chr9	+	37495165	37495983	exonic	NM_022490	POLR1E	AAGAAATACTGAAGATGATTGAGGAGAACAGCTCTGGTCAGCGATGCTATCCACAATGAC
ASCRP3000534	25	25	22	27	26	54	33	23	23	90	124	102	hsa_circRNA_400584		25242744	chr10	+	72604229	72610967	exonic	NM_003901	SGPL1	AAGAAATGTTTTAAGCTCACCAGGAAGATGCCCATTATTGGTCGTAAGAAGGCCTTTGAG
ASCRP3000535	23	18.5	17	22	23	40	26	129	24	150	228	179	hsa_circRNA_034693	hsa_circ_0034693	circBase	chr15	+	41648236	41650456	exonic	NM_016359	NUSAP1	AAGAACACAATTCCATGAATGAACTGAAGGTAACAGAGATTCAAAGGTACCTTCAGAAGG
ASCRP3000536	38.5	47.5	48.5	46	32	1468	310	2426	1369	3500.5	7970	4825	hsa_circRNA_102032	hsa_circ_0008604	circBase	chr17	+	30498061	30503232	exonic	NM_018307	RHOT1	AAGAACAGACAAAGACAGCAGCTAGAGTTGGGAAGACATCACTGATTATGTCTCTGGTCA
ASCRP3000537	755.5	331	520.5	2788.5	89	216	4646	29312	3412	163	421	256	hsa_circRNA_001937	hsa_circ_0000700	circBase	chr16	+	53155459	53155541	intronic	ENST00000447540	CHD9	AAGAACAGCTCTCTGGCTGAACATATCCCTTGGATACTCTAAGACCTGACCCTGATTAAG
ASCRP3000538	30	32	23	33	30	58	46	30	30	131	107	88	hsa_circRNA_030431	hsa_circ_0030431	circBase	chr13	-	75936161	75936743	exonic	NM_014832	TBC1D4	AAGAACAGGACCATGCTCTTCCAGGTTCCTGATGTTATTAGCAGCATAAGGCAATTATCT
ASCRP3000539	43	57	56.5	41	42	172.5	55	58.5	63.5	263	322	272	hsa_circRNA_092519	hsa_circ_0001233	circBase	chr22	-	40825609	40859290	exonic	NM_020831	MKL1	AAGAACATCCTTCCTGTTGAGTCCAGCCTGAAGGAAGCCATCATTGTGCTACAGTTGAAA
ASCRP3000540	31	23	20	27	25	89	131	542	227.5	299	323.5	311	hsa_circRNA_405113		25070500	chr13	-	20315704	20333558	exonic	NR_003272	PSPC1	AAGAACTCAGAAACCAAGAGTTGCAAAAACGGAAGCAAATACAACTAAGGACCCCTCGTC
ASCRP3000541	25	22.5	21	27	22	89	122	493	200.5	331	310	309	hsa_circRNA_000464	hsa_circ_0000464	circBase	chr13	-	20315704	20356931	exonic	NM_001042414	PSPC1	AAGAACTCAGAAACCAAGAGTTGCAAAAACGGAAGCAAATACAACTAAGGCCTGTATCCG
ASCRP3000542	28.5	32	28	23	24	47	42.5	35	31	91	79	61	hsa_circRNA_063453	hsa_circ_0063453	circBase	chr22	-	40859224	40948371	exonic	NM_020831	MKL1	AAGAACTGGTGAGCCAAGGGATCATGCCGCATTGCCATCACGAAAGCCAAAGTGGATTTC
ASCRP3000543	37	35	27	29	28	199	54	29.5	31	201.5	191	135.5	hsa_circRNA_042079	hsa_circ_0042079	circBase	chr17	-	9843442	9850300	exonic	NM_003644	GAS7	AAGAACTTAGCTAAGCTCTCTCAGAACTCCTTGGCTTCACAGGAGGAAGGATAAACTGTG
ASCRP3000544	85.5	87.5	64.5	182	165	302	196.5	800.5	383	674.5	810	598	hsa_circRNA_101034	hsa_circ_0007723	circBase	chr12	+	28458581	28460682	exonic	NM_018318	CCDC91	AAGAACTTCAGTATCTGGAGTCCATCTTTCACCATCTTCTCCTGAGATTGTACTGGACCG
ASCRP3000545	22	22	18	22	20	149	45	109	101	295	543.5	390	hsa_circRNA_006192	hsa_circ_0006192	circBase	chr20	-	39896102	39897723	exonic	uc002xjt.1	ZHX3	AAGAACTTTATCCCCAGGATCTAAACCAGTGCTGGACAATAGATGCTCAGACTGAAATGC
ASCRP3000548	44	83	110	39.5	35	48.5	72	78.5	55.5	89	62	55	hsa_circRNA_104084	hsa_circ_0075829	circBase	chr6	+	22020567	22056919	exonic	NR_015410	CASC15	AAGAAGAGAGCCAGCCAGGATCTGCATTTACTGCTCAACCACATCTAATTTGATGTCCTC
ASCRP3000549	22	20	15	19	19	94	34.5	26	28	138	380	244	hsa_circRNA_070692	hsa_circ_0070692	circBase	chr4	-	113530534	113541346	exonic	NM_018392	ZGRF1	AAGAAGATGAAGTTGAACTAAGTGAACCACTTCAGTCTGTGCAGGTGAAACCTGGAGATG
ASCRP3000550	25	26	24.5	25	23	85	180	712	230.5	437	803	505	hsa_circRNA_103514	hsa_circ_0006156	circBase	chr3	+	171965322	171969331	exonic	NM_022763	FNDC3B	AAGAAGCAGCCCAAAGTCGAATGATTCAGACTTGCAAGGTGATTGAAGATAGTACTGGAG
ASCRP3000551	43	24	20	36	36	41	31.5	21	23	87	68	73	hsa_circRNA_101992	hsa_circ_0002896	circBase	chr17	+	18607931	18608477	exonic	uc002guf.2	TRIM16L	AAGAAGCAGCTGTACACAACCCCATGCAGGTGTTTCAGGGCTTTACGTCATTCAAGGATG
ASCRP3000552	25	30	30	24	23	64	42	75.5	46	115	93.5	89	hsa_circRNA_092416	hsa_circ_0000593	circBase	chr15	+	41988272	42005694	exonic	NM_001080541	MGA	AAGAAGCTAGAATACATCTTATTGCCAGCAGTTTTGAAGATGACTCCCGTGTAGCCTCAC
ASCRP3000553	24	28	22	23	20	32	32.5	35	26	59	63	57	hsa_circRNA_090797	hsa_circ_0090797	circBase	chrX	-	53654360	53674517	exonic	NM_031407	HUWE1	AAGAAGGAGAGGAAATGGAAACTGATATGGATGTGCGAGTTATATCACTGGGTGGACCTG
ASCRP3000554	104	119	96	140.5	132	1721	135	90	88	1806.5	1234	1109	hsa_circRNA_406091		25070500	chr20	-	25000645	25004277	exonic	NM_032501	ACSS1	AAGAAGTATGATCGCTCCTCCCTGCGGACCCTGGGGTCAGCCAAGTGCAAGGTGGTTATC
ASCRP3000555	31	27	22	34	35	58	31	38.5	33	115	161.5	124	hsa_circRNA_102346	hsa_circ_0047398	circBase	chr18	-	33058245	33060527	exonic	NM_194281	INO80C	AAGAAGTATTCTGATGTTTCAGGTCTGCTTGGTATCAGCATGGAAGCCATGAGTGAGAAT
ASCRP3000556	32	28.5	24	27.5	26	78	56.5	65	70	139.5	174.5	138	hsa_circRNA_101825	hsa_circ_0008242	circBase	chr16	-	66759730	66763002	exonic	NM_006141	DYNC1LI2	AAGAAGTCAGCTGGTCCACGACAAAGAGTTGGCAGCAGAAGATGAGCAGGTGTTCCTAAT
ASCRP3000557	22.5	19.5	18.5	46	48	53	29	20	21	63	66	68	hsa_circRNA_002567	hsa_circ_0002567	circBase	chr18	-	66364462	66369027	exonic	NM_019022	TMX3	AAGAAGTGGTTCCTGAGGCATTGCTTCAGAGTTTGGAGTTCGAGGTTATCCAACAATTAA
ASCRP3000558	32	34	31	30.5	28	150	44	47	37	274	303	261	hsa_circRNA_101630	hsa_circ_0036627	circBase	chr15	+	85656607	85669605	exonic	NM_002605	PDE8A	AAGAATATTTTTCTCAGTTTCCAGCCAGAGACGACACTCTTCCATGGCCCGGATACATTC
ASCRP3000559	33	39	31	25.5	23	38	41	38	46	76	66.5	61	hsa_circRNA_007258	hsa_circ_0007258	circBase	chr16	+	29847024	29848279	exonic	NM_005115	MVP	AAGAATCAGCTGGGGCAGAAGCGCGTGGTCAAGGGGAAGAATGGCTGGTCACCACAGTAG
ASCRP3000560	24	25	23	23	26	41	26.5	24	22	60	62	59	hsa_circRNA_406699		25070500	chr5	+	151326199	151327356	intergenic			AAGAATCTCATCTTGTATAAAGACAGACCAAGCTCCGTTCCTGTGAGGGAAGGGAGAGAA
ASCRP3000562	47.5	34	35	58	62.5	66.5	52.5	89	57	133	229	174	hsa_circRNA_407136		25070500	chr8	+	142170730	142173528	exonic	NM_014957	DENND3	AAGAATTTCTCAAAACCAGGGCTCCAGGGGACCATCAGTTTTATAAGCAGGGTGCAGAGC
ASCRP3000563	47	24	22	44	42	60	32	56	55	129.5	524	289	hsa_circRNA_101890	hsa_circ_0040708	circBase	chr16	+	84806146	84808831	exonic	NM_005153	USP10	AAGAATTTTAAATGCCACCGAACCTATCGGCTCTTTGCAGGTTGAGATAAGTCGAAGAGT
ASCRP3000565	25	28	23	24	23	35	35	35	44	86	92	77	hsa_circRNA_101129	hsa_circ_0007007	circBase	chr12	-	109052513	109055934	exonic	NM_014325	CORO1C	AAGACAAGAAAGTGAGAGTCATTGATCCCAGGAAACAAGAGATTGTTGCTGTATGGCAGA
ASCRP3000566	74	125	87	56	32	1543	144	106	172	1174	1594	886	hsa_circRNA_062557	hsa_circ_0062557	circBase	chr22	-	24108020	24109780	exonic	NM_213720	CHCHD10	AAGACACAAATGTGCAATTAAAAGTTTATTTTAGACCACACCGCCCAGCCGCGCCCTCTG
ASCRP3000567	32	36	39	43	40	83.5	36	28.5	43.5	216	233	201	hsa_circRNA_102750	hsa_circ_0055004	circBase	chr2	+	66739280	66775151	exonic	NM_002398	MEIS1	AAGACACGGGACTCACCATCCTTCAAGTGAACAATTGGTGATGGCTTGGACAACAGTGTA
ASCRP3000569	24	20	20	36.5	33.5	46	36	42	31	88.5	158	111	hsa_circRNA_401988		25242744	chr18	+	60497267	60497464	exonic	NM_194449	PHLPP1	AAGACAGCTTGACCGGAAAGATGCATGTTCTGCCACTAATTGGTGGAAAAGAAAACCTCA
ASCRP3000572	53	73.5	82	44	45	66	61	64.5	55	118	141	135	hsa_circRNA_103179	hsa_circ_0062593	circBase	chr22	+	24509532	24530382	exonic	NM_012295	CABIN1	AAGACCAATTTCTTCAACACCGAAGCCAGGACAGCACAGCCGTAGCACTCTCAGACTCTA
ASCRP3000573	26	22	18.5	24	22	167.5	43	84	62	428.5	815	603	hsa_circRNA_102674	hsa_circ_0053932	circBase	chr2	+	33525517	33525640	exonic	NM_000627	LTBP1	AAGACCAGTGTGAAGATATTGATGAATGTCAGCAAGGGAATCTATGTGTAAACGGGCAGT
ASCRP3000574	24.5	25	30	26	24	44	30	28	20	71	50	53	hsa_circRNA_405736		25070500	chr19	-	13064495	13065340	sense overlapping	NM_052850	GADD45GIP1	AAGACCCAGACAGGGAGCAGCACATCGCAGAGTGCATGGCCAAGATGCCACAGATGATTG
ASCRP3000575	82	88	57	68.5	43	812	81	109	105	672.5	914	757.5	hsa_circRNA_100445	hsa_circ_0016404	circBase	chr1	+	212977661	212977993	exonic	NM_001042552	TATDN3	AAGACCTACCATCAACCTTTTACAAGAGCAAGGTTGGACTAGATTTCTCCCCCAGATTTG
ASCRP3000577	36	31	34	52.5	53.5	75	39	28	29	84	108.5	103	hsa_circRNA_405953		25070500	chr2	+	122797766	122800683	intergenic			AAGACTAATTACCCAACTGCCTCCGACTGACAAGATTGAGCATTTACAGAAGCAGGAATC
ASCRP3000579	45	43	42	110	57.5	104	391	2121	637	305	466	309	hsa_circRNA_100213	hsa_circ_0000069	circBase	chr1	-	47745912	47748131	exonic	NM_003035	STIL	AAGACTACTTCAGGCACAGGTCTTCCCAAAAGTTATCTTCTGGGAAGATGCCAATACATG
ASCRP3000582	82	58.5	46.5	56.5	31.5	90.5	168	360	296	453	1136.5	613	hsa_circRNA_017215	hsa_circ_0017215	circBase	chr1	-	243242289	243265046	exonic	NR_029401	LINC01347	AAGACTTCTGAATCCAGGAAGAGAAACTGACTGGGCAACATGTTATTCAGGCGACGTCAG
ASCRP3000583	30	29	30.5	23	24	51	42.5	30.5	35	65	64	60	hsa_circRNA_092470	hsa_circ_0000941	circBase	chr19	+	45781180	45781873	exonic	NM_031417	MARK4	AAGAGAATTGGAGCTGCGGGAGCGAGTACTCAGAGGGAAGTACCGGGTCCCTTTCTACAT
ASCRP3000584	144	133	142	189	137.5	944.5	106	81.5	100	971	910.5	829.5	hsa_circRNA_000931	hsa_circ_0001045	circBase	chr2	-	95756566	95756769	intronic	ENST00000272418	MRPS5	AAGAGACGTGTCCCTCCATCCTTAGTTAAATGAGTCTGGGGGGAGACCCCCCAAGATTTA
ASCRP3000585	25	26	21	32	23.5	1002.5	90	305.5	270.5	1504	3337	2296.5	hsa_circRNA_102726	hsa_circ_0001009	circBase	chr2	-	58449076	58459247	exonic	NM_018062	FANCL	AAGAGATAGGAACTCTTGGTTGGGATAAGGAAGAGACTTCCACCTTAGGATAGTGTTGCC
ASCRP3000586	26	22	19.5	23.5	24	36	30	22	22	65	64	59	hsa_circRNA_074018	hsa_circ_0074018	circBase	chr5	+	134153185	134153404	exonic	NM_014829	DDX46	AAGAGATATGAAGAAGAATTAGAGATCAATGACTTCCCACAGGATGTGATGCAGCAGGCC
ASCRP3000587	51	62	65	71	48	149	68.5	87.5	48	225.5	198	162	hsa_circRNA_007672	hsa_circ_0007672	circBase	chr7	+	65705311	65706257	exonic	NM_003596	TPST1	AAGAGATGATTGGGAAAGCTGGGGGAGTGTCTCTGTCAAAATGTTGGTTATCTTTCTGAA
ASCRP3000588	32	27	25	37	34.5	43	36	26	37.5	70.5	63	53	hsa_circRNA_407261		25070500	chrX	-	2828699	2856298	sense overlapping	NM_000047	ARSE	AAGAGATGGACACAGCCAGTTAGGGGGATGGAACGGAATTTACAAAGGTGGGAAGGGCAT
ASCRP3000589	30	23	22	27	24	460	80.5	148	193	931	1961	1325.5	hsa_circRNA_101343	hsa_circ_0031632	circBase	chr14	-	35261980	35331528	exonic	NM_013448	BAZ1A	AAGAGCAACTAACTGATGCTGACACCAAAGTGACTTTTTTGAACGAACCATTCTGTGCAA
ASCRP3000590	28	41	37	28	27	32	41	33	32	59	53	53	hsa_circRNA_101382	hsa_circ_0008682	circBase	chr14	+	71428942	71445365	exonic	NM_014982	PCNX	AAGAGCAAGATGCAGTCAGTGGAGTGATCCTGGTGGAGGGATTGAAATGTCTGAGTTCAT
ASCRP3000591	20	23	21	20	22	51	32	36	30	148	167	108	hsa_circRNA_102823	hsa_circ_0002291	circBase	chr2	+	135848567	135851263	exonic	NM_012233	RAB3GAP1	AAGAGCACATTGCCTGGTAAGATGGGTATATTTACTTCTGGCACATGGGAAGAGAAATCA
ASCRP3000592	40	39	29	39	42	54	49	35	34	99	84	78	hsa_circRNA_103676	hsa_circ_0070133	circBase	chr4	+	79229219	79258971	exonic	NM_025074	FRAS1	AAGAGCAGTTCCTCAACCTCGTGGGATACTGTGCTGTCTGCCATGAGTCCTGTGCAGGTT
ASCRP3000593	69	65	45	60	59.5	1800	166.5	469	268	3504	5583	3490	hsa_circRNA_058188	hsa_circ_0058188	circBase	chr2	+	217329319	217332769	exonic	NM_014140	SMARCAL1	AAGAGCTTGAGAGAAAGAAACAGCAGCAGAAAGATGCCCTCATTCTCTTCTTCAACAGAA
ASCRP3000594	24	25	22	28.5	29.5	110.5	61	189.5	138	233.5	549	366.5	hsa_circRNA_039934	hsa_circ_0039934	circBase	chr16	+	68215377	68217269	exonic	NM_004555	NFATC3	AAGAGGAAAAAAAGCCAGTCTCAACGTTTTACTTATACACCAGATGGACGACCTCAGTGG
ASCRP3000595	36.5	34	31	32	29	66.5	117	268.5	189	173	259	195	hsa_circRNA_404729		25070500	chr10	+	26789747	26802589	exonic	NM_019043	APBB1IP	AAGAGGAGAAATATGCTGTATTTAAAAACCCCCAGAGTCCTTAAATGCACTGGAAGACCA
ASCRP3000596	34	26	26.5	58.5	22	760	285	518	565	1814	2601	1879	hsa_circRNA_002115	hsa_circ_0001676	circBase	chr7	+	7826418	7841374	sense overlapping	NM_001302348	UMAD1	AAGAGGCAAAACTTCGGACATAGAGGCCAACCAACCTTTGGAGAGTGAAGAGAGAACCTG
ASCRP3000597	23	22	21	21	21	83	59	154	127.5	211	314.5	200	hsa_circRNA_002004	hsa_circ_0002004	circBase	chr3	+	180665652	180667131	exonic	NM_005087	FXR1	AAGAGGCCACTAAGCATTTAGAAGTATATTCAAGAGCAAATGACCAAGAGCCATGTGGGT
ASCRP3000598	48	34	31	40.5	35	967.5	139	147	260	1102.5	2242	1482	hsa_circRNA_104371	hsa_circ_0001708	circBase	chr7	+	50358643	50367353	exonic	NM_006060	IKZF1	AAGAGTGACAGAGTCGTGGATAACCTGAGGACCATGGATGCTGATGAGGGTCAAGACATG
ASCRP3000599	166.5	45	41	112.5	35	3021	498	957	2046	6486	12183	8872	hsa_circRNA_100363	hsa_circ_0014717	circBase	chr1	-	156290629	156304709	exonic	NM_005998	CCT3	AAGAGTGGAAAAGACTATTGCAGATATCATCCGAACATGTTTGGGACCCAAGTCCATGAT
ASCRP3000600	24	25	19	26	33	38	27.5	21	23	60	56	56	hsa_circRNA_102332	hsa_circ_0047288	circBase	chr18	-	21757976	21759799	exonic	NM_018030	OSBPL1A	AAGAGTGTAGAAGCAGAACCCAAAGGAACCATCACCTTGGAGCTCCTTGATGTGTAGCTG
ASCRP3000602	34	36	31	23	20	36	78	90	80.5	72	74	61	hsa_circRNA_063147	hsa_circ_0063147	circBase	chr22	-	36723505	36737571	exonic	NM_002473	MYH9	AAGATCAATCCATCTTGTGCACACCTATTCAGGCCTGTTCTGTGTGGTCATCAATCCTTA
ASCRP3000603	37	49	103	40.5	25	2010	101	377.5	237	2950	9610	5412	hsa_circRNA_102631	hsa_circ_0005556	circBase	chr2	-	15693549	15698758	exonic	NM_015909	NBAS	AAGATCAGTGTGTGGAAATCAGCCTAGAGGCAACCAAAAACATGGTGCATCCTTTATCAT
ASCRP3000604	26	22	20	22	30	40.5	28	18	24.5	77	92.5	80	hsa_circRNA_406336		25070500	chr3	+	122808014	122825688	exonic	NM_006810	PDIA5	AAGATCCTGGAGCCAAAGATGTTGTCCACCTTGACAGTGAAAAGGTGGTCCTGCCATCAT
ASCRP3000605	3844	5969.5	4227	17540	15851.5	14872	7917	15084	3220.5	11943	15388.5	10737	hsa_circRNA_406757		25070500	chr6	+	33653604	33653803	intronic	ENST00000374316	ITPR3	AAGATCGTGCTTCCCAGGCCAGCCTCCCTCTCCGTGCTGTAGCTGTGCTGTGAGTGCCTC
ASCRP3000606	37.5	28	26	37	27	505	191	134.5	259.5	1709	2541	1939	hsa_circRNA_101797	hsa_circ_0000690	circBase	chr16	+	30495147	30495584	exonic	NM_002209	ITGAL	AAGATCTATTCACTGAGCTGCAGAAGAAGATCTATGTCATTGAGGGACAGAGGTGTTCCG
ASCRP3000607	383	537.5	286	331	210	2131	304	301	274	987.5	1477.5	1084	hsa_circRNA_401965		25242744	chr18	+	42529845	42533305	exonic	NM_015559	SETBP1	AAGATGAACCGCAAGGAGAGAAGTTCTTATGACTCCTCCATGTCTCCAGGCTTACGAGAG
ASCRP3000608	40	61.5	44	29	25.5	480	52	38.5	40	318.5	249.5	183	hsa_circRNA_402819		25242744	chr3	-	33114035	33118729	exonic	uc011axk.1	GLB1	AAGATGAAGATGGCTGGGCTGAACGCCATCCAGACTCTCGATTCCTTCCTTGGGCTTTTC
ASCRP3000609	26	24	22.5	23	19	89	70	204.5	134	509.5	960	604	hsa_circRNA_009074	hsa_circ_0009074	circBase	chr6	-	149833290	149838586	exonic	NM_139126	PPIL4	AAGATGAGGACTACATGCCAATCAAAAATACTAATCAGGTGGGAAATACACCAAGAGTGA
ASCRP3000610	23	23	20	22	22	37	38	72	40	70	98.5	84	hsa_circRNA_404077		25242744	chr8	+	100108539	100123507	exonic	NM_015243	VPS13B	AAGATGCCATCTGTTATTAAAGATGACCATGAAAGCTGTGGTTCTAATTCTACCAACCGT
ASCRP3000611	21	20	21	22	25	76.5	34	45	37	176.5	319	241.5	hsa_circRNA_006515	hsa_circ_0006515	circBase	chr9	-	36351111	36353328	exonic	NM_022781	RNF38	AAGATGGAGAAGTAGAAAATTACGAGCCTCTGCAAAGGATAGAAAATGAAGTGGAACTCT
ASCRP3000613	20	22	22	23	20	42	44	69	39	112	129	87	hsa_circRNA_003998	hsa_circ_0003998	circBase	chr20	+	47570092	47580435	exonic	NM_006420	ARFGEF2	AAGATGTAGTCACATCTGCCATTAAAGTTGCAGGAGGCCAGAGAACTGGAAAAACCAATC
ASCRP3000614	351	565	679	1026	1011	974	1024	1287	311.5	1611.5	2101.5	1646	hsa_circRNA_066970	hsa_circ_0066970	circBase	chr3	+	121563299	121576003	exonic	NM_018456	EAF2	AAGATGTCCCCAGCATCTCCAATAGATGATATCGAAAGAGATGACTTCAAACCTGCTTCT
ASCRP3000615	497	228	207.5	166	151	33341	450.5	743	1139	33542	54774	38987	hsa_circRNA_102711	hsa_circ_0054406	circBase	chr2	+	44436348	44436466	exonic	NM_002706	PPM1B	AAGATTCAGAGTTGGATAAGCACTTGGAATCACGGGTTGAAGGGAAGTCGAGATAACATG
ASCRP3000616	46	39	40	55	59.5	82	51.5	52	34.5	163.5	157	103	hsa_circRNA_401876		25242744	chr17	+	72285732	72287272	exonic	NM_023036	DNAI2	AAGATTCCCACGTACTCCTGGGTGGCTGCTACAATGGACAGATAGGGACCCCCAGGAAAT
ASCRP3000617	29	28	25	28	24	68.5	34	37	36	141	176	146	hsa_circRNA_404026		25242744	chr8	+	42401611	42403923	exonic	NM_138436	SMIM19	AAGATTCGTTTAAGACAACAACTGGAAATGTATTCCATTTCCCCATGGCTGGGGGTTATG
ASCRP3000618	19	20	18	19.5	21	52	28	19	21	105.5	143	116	hsa_circRNA_104520	hsa_circ_0082892	circBase	chr7	+	150022929	150023099	exonic	NM_001142928	LRRC61	AAGATTGTGAAGCAATAGCCTAAGATTCATTTGGATTCAAGGTTGGCTCTCAACAGTGCC
ASCRP3000619	33	31	27	25.5	23	114	69.5	131	99	330	565	370	hsa_circRNA_003131	hsa_circ_0003131	circBase	chr6	-	36492117	36507984	exonic	NM_007271	STK38	AAGATTTTGAGTCCTTAAAAGTAATAGGCAGAGGAGCATTTGGTGAGCAGCCATGGCAAT
ASCRP3000620	25	23	20.5	21	23	41.5	30.5	25.5	25	56	50.5	60	hsa_circRNA_404529		25070500	chr1	-	68656995	68659910	intronic	ENST00000370976	WLS	AAGCAAAGGAGAATAAGGACAACAAGAAGAGCCATGGGAGGATGAGATAGCTCCAGGGCC
ASCRP3000621	24	19	17.5	20.5	24	33	27	19.5	26	65.5	79	63	hsa_circRNA_402608		25242744	chr20	+	47591302	47592736	exonic	NM_006420	ARFGEF2	AAGCAACAAAAAGAAATCATTGAACACGGCATCGAGCTGAGCTCAGCCTGAGGAAGAAAG
ASCRP3000623	34.5	26.5	28	36	44	41	34	31	29	78	80	77	hsa_circRNA_101467	hsa_circ_0034293	circBase	chr15	-	30053341	30065560	exonic	NM_003257	TJP1	AAGCAATGGCAGGCTCCTGGATTTGGATTTGGAATTGCAATATCTGGTGGACGAGATAAT
ASCRP3000624	19	22.5	19	21	22	327	33	43	27	535	937	587	hsa_circRNA_007136	hsa_circ_0007136	circBase	chr2	-	45704131	45715470	exonic	NM_018079	SRBD1	AAGCACATTGGAGTTGGAATGTATCAGTATCGTCAGTGAAGCAGGAGCATCAATCTACAG
ASCRP3000625	30	27	31	30	22.5	97	148.5	348.5	122	207	341	238	hsa_circRNA_101418	hsa_circ_0032825	circBase	chr14	-	81297486	81307112	exonic	NM_152446	CEP128	AAGCACATTTGGCATCACAAGTAGAGGCACTAAAGAAACAAGAAGCTAAAGCAGATGAGC
ASCRP3000626	23	19	18	21	24	59	41	88	66	133	199	166	hsa_circRNA_030340	hsa_circ_0030340	circBase	chr13	-	52992126	53000201	exonic	NM_016075	VPS36	AAGCACTGAAATTACCTCTCAGACCATCAGGTTTAAATCCTACTTGCTGAGCATGGGAAT
ASCRP3000627	98	55	54.5	178	145	138.5	118	212	93	332	365	244	hsa_circRNA_011588	hsa_circ_0011588	circBase	chr1	-	36211051	36212593	exonic	NM_022111	CLSPN	AAGCACTTGCTCTTTGCTCAGGCTCTTTTCCCACAGACAAGTTCTTAAATGTTAGAAACC
ASCRP3000628	40	32.5	30.5	33	36.5	53	42.5	25	40	95	78.5	84	hsa_circRNA_000104	hsa_circ_0000266	circBase	chr10	-	126336614	126337010	intronic	ENST00000337318	FAM53B	AAGCAGATTTTCAGCATCCTAGGAAGAACCAAGAATGCAGAAGTCTGGGGGTGGTGGAGA
ASCRP3000629	26	25	23.5	28.5	28	34	42.5	80	50	84	81	71.5	hsa_circRNA_101490	hsa_circ_0000592	circBase	chr15	+	41988272	41991357	exonic	NM_001080541	MGA	AAGCAGGTGATACATCCTGGTCTTCAAGAAGTCTTATTGCCAGCAGTTTTGAAGATGACT
ASCRP3000630	48	31	26	55.5	51	78	48	32	35	113.5	175	153	hsa_circRNA_102560	hsa_circ_0051245	circBase	chr19	+	42373100	42375484	exonic	NM_001022	RPS19	AAGCATTAGAACAAACCATGCTGGGTTAATAAATTGCCTCATTCGTAACTTCCACAGCGC
ASCRP3000631	19	23	20	18	20	32	28	24	22	88	139.5	111	hsa_circRNA_403194		25242744	chr4	-	106317405	106359193	exonic	NM_176869	PPA2	AAGCATTGCTTATGAAGAAGTGTAATGGAGGAGCTATAAATTGACTTGGGAAGATCCCCA
ASCRP3000633	24	22	24	24	24	61	48	109	38	89	122.5	86	hsa_circRNA_405832		25070500	chr2	-	24098698	24111269	exonic	NM_017552	ATAD2B	AAGCCATATTAGGTTAACTTCTCAGCCTGGTGCTACATTACCAAATGGACATAGTGGCTT
ASCRP3000634	23	26	24	25	26	199	78	591	288	381.5	890	526	hsa_circRNA_021714	hsa_circ_0021714	circBase	chr11	+	35160416	35222742	exonic	NM_000610	CD44	AAGCCATTCAAATCCGGAAGTGCTACTTCAGACAACCACAAGGATGACTGGAGAAGAAAG
ASCRP3000635	113	111.5	111	111	104.5	509	145	128	90.5	495	420	301	hsa_circRNA_000624	hsa_circ_0000751	circBase	chr17	-	27620262	27620746	intronic	ENST00000225388	NUFIP2	AAGCCCACCTGTGGCCTTGGGGCTCCCCGTCTCGATGGGGGTGGGGCTGGATCCGAAAAG
ASCRP3000636	22.5	19	18	32.5	39	116.5	35	32.5	38	388	967.5	633	hsa_circRNA_402767		25242744	chr22	+	46739158	46742441	exonic	NM_018006	TRMU	AAGCCCGAAGGGCTTTTCAGAAATCGGTTTGAAGTTAGAAATGTGACTTTTTGAATGAGT
ASCRP3000637	23	22	28	25	24	57.5	85.5	197.5	112	126	148	115.5	hsa_circRNA_102347	hsa_circ_0000842	circBase	chr18	-	33606862	33613800	exonic	NM_018170	RPRD1A	AAGCCCTTGCAGAGAAAGAGCATAAATTGGAACCAAACCAAACAGGAAGCTTACTTTTCT
ASCRP3000638	21	25	20	21	21	44	32	35	30.5	74	68	64	hsa_circRNA_001152	hsa_circ_0001152	circBase	chr20	-	35539620	35540955	exonic	NM_015474	SAMHD1	AAGCCTATACTAAGCTGACAGGAAGTTGGAAATCTGTATGACATGTTCCACACTCGCAAC
ASCRP3000639	38	30	29	38	37	82	31	26	28	206	303	205.5	hsa_circRNA_005135	hsa_circ_0005135	circBase	chr19	-	50347572	50347855	exonic	ENST00000600742	PTOV1-AS1	AAGCCTGGATTCTTGACCCCCAGCAACGAGAAGCTGGATGCCACATTGCAACTGCAAGGT
ASCRP3000640	668	1115	1085.5	4134.5	4642.5	12714	1232.5	1524	473	20360	34001	20733	hsa_circRNA_044097	hsa_circ_0044097	circBase	chr17	-	42929776	42932372	exonic	NM_004247	EFTUD2	AAGCCTTTTCTCTGTCTGTCTTCCACCACTGGCAGGAACAAGATCACCATGATTGCTGAG
ASCRP3000641	23	31	26	27	24	44	47	130.5	63.5	132	266	178	hsa_circRNA_105033	hsa_circ_0002372	circBase	chrX	-	138897036	138908982	exonic	NM_173694	ATP11C	AAGCGAGTGAGAAAAGAAAGTGAAAAAATCAAGTGTGCTGGAGAAGAGAAACGAGTTGGC
ASCRP3000642	175.5	150	108	338	286	180	259	224.5	171	274	244	220	hsa_circRNA_049851	hsa_circ_0049851	circBase	chr19	+	15939756	15946230	exonic	TCONS_00026750	XLOC_012981	AAGCTAATATGCCTGATTGACATTCTTCTGGACAATGAGTCCCATCATCTCTCCACCATG
ASCRP3000643	42	35.5	31	46.5	39	181	55	62.5	41	437	356	416.5	hsa_circRNA_103700	hsa_circ_0070421	circBase	chr4	+	89396991	89400658	exonic	NM_016323	HERC5	AAGCTCTCCTAGAAATGTTGAAGAAGCTGCACAGGATAACCACCTGCCTCAAAGATAATC
ASCRP3000644	36.5	24	22	36	40	36	29	23	28	58	50	53	hsa_circRNA_103773	hsa_circ_0003437	circBase	chr4	+	184114751	184130178	exonic	NM_024949	WWC2	AAGCTGAGATCTCCACTACAAGATTAAGGGTTAACGAAGCCCTTGTCATTTGCTGATTGT
ASCRP3000645	22	24	21	25	24	47	37	90	57	92.5	112.5	98	hsa_circRNA_031607	hsa_circ_0031607	circBase	chr14	-	35044961	35078948	exonic	NM_021249	SNX6	AAGCTGCTAAGCTTAAAGCAATAAATGTAGATCTTCAAAGTGATGCTGCTCTGCAGGTGG
ASCRP3000646	44	52	36.5	31	24	36	38	51	44	91	96.5	76	hsa_circRNA_103515	hsa_circ_0067991	circBase	chr3	+	171969049	172025291	exonic	NM_022763	FNDC3B	AAGCTGGCACATAGGAGCAAAAGTTCACTAACCCTGCAGTGGAAGAAATTATACCATTTT
ASCRP3000647	81	67	65	81	69	162	83	65	72	275	232	205	hsa_circRNA_104396	hsa_circ_0002690	circBase	chr7	+	73510951	73511519	exonic	NM_002314	LIMK1	AAGCTGTACTGGTGTTGTGACTGCAGTGCCTCCCTGTCGCACCAGTACTATGAGAAGGAT
ASCRP3000648	38.5	32	29	102	102	42	46	48	33	97	80.5	73	hsa_circRNA_026129	hsa_circ_0026129	circBase	chr12	-	49578582	49579773	sense overlapping	NM_006009	TUBA1A	AAGCTGTCCATTTCTGTGATGGGTTTTGAATAAAGTATTCCCTGTCTTAAGCCGACCAGT
ASCRP3000649	30	28	27	30	29	161	79.5	292.5	214	455	527	431.5	hsa_circRNA_104527	hsa_circ_0083054	circBase	chr7	-	152007050	152009031	exonic	NM_170606	KMT2C	AAGCTGTTGTCTCAGGGAGCACAGAAAGAACGATCTCCTCAGCAGAATATAGTATCTTGT
ASCRP3000651	24	22	21	27	23	53.5	32	84.5	51	100	104	97	hsa_circRNA_100800	hsa_circ_0021773	circBase	chr11	+	43421437	43429127	exonic	NM_018259	TTC17	AAGCTTTGGCCATCAATAGCTCTGAGATCTCTCCAGCGAACACTGAATGAGTTAAAAGAG
ASCRP3000652	18.5	24	20	20	20	58	38	57.5	54.5	123	138	93	hsa_circRNA_036389	hsa_circ_0036389	circBase	chr15	-	76508628	76588078	exonic	NM_000126	ETFA	AAGCTTTTCCACAGCTTTAAAACTATCAGAAGCCTCATTGCTACGATTTCAGAGTACCCT
ASCRP3000654	21	24	22	25	25	70	61	116	58	143	180	137	hsa_circRNA_100786	hsa_circ_0005974	circBase	chr11	+	34093272	34098189	exonic	NM_005898	CAPRIN1	AAGGAAAAACCTGTATGTGGAACCACCTGGTAAGCTTGATGATTACCAGGAACGAATGAA
ASCRP3000655	25	28	25	26	25	41.5	52.5	43	52	78	103	80.5	hsa_circRNA_007878	hsa_circ_0007878	circBase	chr3	-	47956306	47960331	exonic	NM_002375	MAP4	AAGGAAACCATGCAACAGTCAACCTTCTGAGCTTTCTTCAGAGACCTCAGGTATGTCTCC
ASCRP3000656	26	24	21	22	21	38	29	20	26	64	67	68	hsa_circRNA_103854	hsa_circ_0004418	circBase	chr5	-	64556426	64587297	exonic	NM_197941	ADAMTS6	AAGGAAACGGTATCGCTCCTGTAACACAGATTTCAGGCCGTGGTACTTGCCTTGATAATG
ASCRP3000657	26	25	23	29	29	151	36	30.5	32	174	177	119.5	hsa_circRNA_003850	hsa_circ_0003850	circBase	chr4	+	3088665	3117990	exonic	NM_002111	HTT	AAGGAAAGAAATGGAAGTCTCTCCTTCTGCAGAGCAGCTTGTCCAGAAAGAAAGAACTTT
ASCRP3000658	42	31.5	31	31	38	118	68.5	99	75	260.5	449	270	hsa_circRNA_402621		25242744	chr20	-	49558567	49571822	exonic	NM_003859	DPM1	AAGGAAATGGAGGTGTATATGGCTGGGATTTGAAAAGAAAAATAATCAGTGGAATCAACT
ASCRP3000659	74	37	31	91.5	24	1037	714	2627	2139	2918	4594	3386	hsa_circRNA_103344	hsa_circ_0001290	circBase	chr3	-	47139444	47147610	exonic	NM_014159	SETD2	AAGGAACGATCTCGTAAGAAGGATTCAGAACACCTTTGTCCTAGAATATTGTGGAGAGGT
ASCRP3000660	30	27.5	27	34	22	128	260	668	674.5	636.5	950.5	559	hsa_circRNA_001314	hsa_circ_0001314	circBase	chr3	-	56661064	56662642	exonic	NM_015224	FAM208A	AAGGAACTAGGCAGGAATATCTTATCAAATTAGGCAATACAGAATGTCATCCTGAACAGT
ASCRP3000661	82	87	88	54	47	233	65.5	47	84.5	235	328	268	hsa_circRNA_008289	hsa_circ_0008289	circBase	chr6	+	155448623	155451551	exonic	NM_012454	TIAM2	AAGGAAGAAAAGGAAACTCCAGGCTCACTTCATGGACTCACTTTGCGTGCTTGTTAAATG
ASCRP3000662	24	22	17	22	23	55	27	22	21	67	61	66	hsa_circRNA_407025		25070500	chr7	-	149930123	149934697	sense overlapping	TCONS_00014005	XLOC_006645	AAGGAAGAGTGCCAAAGAAGGAATAAATAAAGGTACTTGGAGTTCTTCCAGGGCGTTACC
ASCRP3000664	33	24	30	40	47	171	43	55	63	294	741	466.5	hsa_circRNA_004092	hsa_circ_0004092	circBase	chr6	-	74149931	74150168	exonic	NM_138441	MB21D1	AAGGAAGGAAATGGTTTCCAAGATACAGATGTCATCATGAAGAGGAAAAGAGGAGGGAGC
ASCRP3000665	67	56	45	86	56	276.5	88	101	66.5	336	404	265	hsa_circRNA_007877	hsa_circ_0007877	circBase	chr1	-	21573713	21585332	exonic	NM_001397	ECE1	AAGGAATACCTTGAGCAGATCTCCACTCTCATCAACACCACCGACAGATGCTCGGGGGCT
ASCRP3000666	25	27	20	25	26	30	33	26	29	60	56	55.5	hsa_circRNA_401746		25242744	chr17	+	25932459	25938655	exonic	NM_014238	KSR1	AAGGAATGAAGCGTGTCCTGACTTCTGTCAGCTTGGGGAAGGAAGTCAGTGCTGAGGAGC
ASCRP3000667	21	20	21	21	26	142	27.5	42	25	392	800	557	hsa_circRNA_101507	hsa_circ_0035052	circBase	chr15	+	44620882	44673174	exonic	NM_138423	CASC4	AAGGACAGAGTCAGTGATTTCCATAAATTGAAGCAAAAGCAACTTGCTGAGCTTCGTCAG
ASCRP3000668	35	31	28	28	33	47	35	25	30	61	67	58	hsa_circRNA_010009	hsa_circ_0010009	circBase	chr1	+	12422775	12557685	exonic	NM_015378	VPS13D	AAGGACAGGAGCAGCTCTTCAAACTCACAGACAACATACAGGACGAATTGTATTGATGTC
ASCRP3000669	30	25	23	24	19	49	41	101	46	83	106.5	85	hsa_circRNA_003196	hsa_circ_0003196	circBase	chr4	-	170458959	170477246	exonic	NM_012224	NEK1	AAGGACATATGGCTCCTTTTCTGGGCAGTGGAGGGACTATAGCTCCATCATCTTTTTCTT
ASCRP3000670	22	22	20	25	30	55	27	20	24	72	69	67	hsa_circRNA_103286	hsa_circ_0003862	circBase	chr3	+	11354777	11356967	exonic	NM_006395	ATG7	AAGGACGAAGGATCTAAAGAAGTACCACTTCTACTATTGGTTTTGCTATCCTGCCCTCTG
ASCRP3000671	33	29.5	26	56	44	80	35	30	30	126	117	114	hsa_circRNA_403718		25242744	chr6	-	142221459	142231148	exonic	uc003qit.1	AK097143	AAGGACTGCTGGAATGCTGACTTGGTTTATGTATCTATCTCTTTCCCACACCATCTATGC
ASCRP3000672	25	22	21	25	25.5	35	29.5	28	27	74	95	85	hsa_circRNA_023641	hsa_circ_0023641	circBase	chr11	+	75718577	75728024	exonic	NM_003369	UVRAG	AAGGAGAGAGAAGAACTCTTCTTGAAGACTAATGCTCAGTTGACAATTCGTTGCAGGCAG
ASCRP3000673	34	22	21	28	24	808	89	120	187	1060.5	2183.5	1544	hsa_circRNA_101098	hsa_circ_0027493	circBase	chr12	+	69218142	69218431	exonic	NM_002392	MDM2	AAGGAGAGCAATTAGTGAGACAGAATCATCGGACTCAGGTACATCTGTGAGTGAGAACAG
ASCRP3000674	27	26	22	20	19.5	36	43	53.5	52.5	68	70	64.5	hsa_circRNA_105041	hsa_circ_0092125	circBase	chrX	-	153762552	153762711	exonic	NM_000402	G6PD	AAGGAGATGGTGCAGAACCTCATGGTGCTGAGAGGCTGGAACCGCATCATCGTGGAGAAG
ASCRP3000675	31.5	26	22	30.5	31	36	41	35	46.5	82	93.5	84	hsa_circRNA_104006	hsa_circ_0074945	circBase	chr5	+	169108747	169116337	exonic	NM_004946	DOCK2	AAGGAGATTGAGATGCTCAACAATCTGAAGGTGGTCTTCACGAATCCTTGAGCTTGATTT
ASCRP3000676	41	37	45	25	32	43.5	43	29.5	40	94	66.5	66.5	hsa_circRNA_406353		25070500	chr3	-	129684543	129690951	sense overlapping	ENST00000509201	RP11-93K22.6	AAGGAGCAACAGGATTACTGTCCACAAACAAACAAACAGCACCAAAACTCCCAACAATAA
ASCRP3000677	26	22.5	19	27	28	40	29	25	22.5	71	66	71.5	hsa_circRNA_019061	hsa_circ_0019061	circBase	chr10	+	90661412	90682193	exonic	NM_020799	STAMBPL1	AAGGAGCCCAGGCTGTTCAGTATGAAGTGATTGAGAAGAAACAGTGAACATCCTCATTTC
ASCRP3000678	30	21	22	25	27	36	36	34.5	25	62	59	63	hsa_circRNA_043523	hsa_circ_0043523	circBase	chr17	+	38416786	38418893	exonic	NM_133264	WIPF2	AAGGAGGAGTGCTGAAGCTTCGACCTGTGGGAGCCAAGGATGGTTCAGGCAAACACAGAG
ASCRP3000680	81	64	67	51	42	113	85	90	110	246.5	238	155	hsa_circRNA_103407	hsa_circ_0007761	circBase	chr3	+	63898263	63898901	exonic	NM_000333	ATXN7	AAGGAGTTTGGGAAAAACCGCGAAGTCATGGGGCTCTGTCGGGAAGGAGCGGAAAGAATG
ASCRP3000681	27	23	23.5	44.5	64	29.5	28.5	21	24	58	47	48	hsa_circRNA_035152	hsa_circ_0035152	circBase	chr15	-	48766451	48786451	exonic	NM_000138	FBN1	AAGGATACACAGGTGATGGCTTCACTTGTACAGATCCCATATGTGGTAAAGGGTACTCAA
ASCRP3000682	28	24	20	34	28.5	44	33	25	24.5	73	73	68	hsa_circRNA_100394	hsa_circ_0015272	circBase	chr1	+	173702851	173703425	exonic	NM_014458	KLHL20	AAGGATAGCAGACAAGTTCACCCAACATAACTTTCAAGAGGTGTACCAACATTCGACCAG
ASCRP3000684	350	360	311.5	826	742	1265.5	535	690	395	1549.5	1546	1346	hsa_circRNA_101275	hsa_circ_0030428	circBase	chr13	-	75915260	75915723	exonic	NM_014832	TBC1D4	AAGGCCCTTCTGTCTCTACCCACCAAGAGCCAAGCTGGTGATACAGAGGCATCTCTCATC
ASCRP3000685	33	31	27	26	28.5	45	32	24.5	32	74	62	59	hsa_circRNA_101329	hsa_circ_0031408	circBase	chr14	-	25443870	25444056	exonic	NM_014178	STXBP6	AAGGCGAATATTTAACTTATATCTGCCTGTCAGATTCACTGCGTGCTGTCCTCACTTGTT
ASCRP3000686	71.5	26	22	58.5	66	41	46	65	69	84	118	91	hsa_circRNA_003627	hsa_circ_0003627	circBase	chr17	+	1778954	1787238	exonic	NM_002945	RPA1	AAGGCGACAAGGTTCTACTGTTTCTAAGGCTTATGGTGCTTCAAAGACATTTGGAAAAGC
ASCRP3000687	19	21	20	21	20	76	28	26.5	19	122	224	127.5	hsa_circRNA_406052		25070500	chr2	-	225393663	225422573	sense overlapping	NM_003590	CUL3	AAGGCTAATAGAAGAATTGCTGTGCAAAACTTTATGGAGAATTTCAAAGATGACCATGGA
ASCRP3000689	37	36.5	28.5	29.5	31	40	40	34	37	64.5	63	59.5	hsa_circRNA_102447	hsa_circ_0005360	circBase	chr19	+	11221327	11222315	exonic	NM_000527	LDLR	AAGGCTGTGGGGACCAACGAATGCTTGGACAACAACGGCGGCTGTTCCCACGTCTGCAAT
ASCRP3000690	23	24	23.5	22.5	22	377	31	47.5	40	788.5	2012.5	1319	hsa_circRNA_100521	hsa_circ_0017438	circBase	chr10	+	1118055	1126416	exonic	NM_014023	WDR37	AAGGCTTCCACCAGCAAGCTTATTGCAGGAGTGACCAGGACACTACCTCCTAGAAGTAAT
ASCRP3000691	39	30	27	34.5	32	32.5	47	35	35.5	77	51	48	hsa_circRNA_405661		25070500	chr18	-	14077332	14085075	sense overlapping	NR_033354	ZNF519	AAGGGAAGGAAGTATATTGGGAGTGGAAAAGCGAGATTGTCTTTGACCATTTGCTATGGA
ASCRP3000692	21	22	18	24	25	30	32.5	32.5	28.5	74	75.5	65	hsa_circRNA_102695	hsa_circ_0054134	circBase	chr2	-	38570409	38570654	exonic	NM_022374	ATL2	AAGGGAAGTCATTTCTACTGGACTTCATGCTTAGATACATGTATAACAAGGTGAGAATTA
ASCRP3000693	694	214.5	193.5	341	266	1504	1338.5	2015	3281.5	4328	6186	4938.5	hsa_circRNA_104543	hsa_circ_0083172	circBase	chr7	+	157151240	157160177	exonic	NM_005494	DNAJB6	AAGGGACCCATTTTCATTTGACTTCTTTGGACCCATTCCAACAATCTCGTAAAACATGGT
ASCRP3000694	37	27	20	53	49	33	34.5	90	51	77	99.5	77	hsa_circRNA_040698	hsa_circ_0040698	circBase	chr16	+	84767040	84779279	exonic	NM_005153	USP10	AAGGGCTTGTTCCGGTTTCAGAGGATCCTGTAGCCATAAAGATTGCAGTATATTTTTGGA
ASCRP3000695	31	30	24.5	39	30	206	144	695	690	889	2614	1427	hsa_circRNA_404964		25070500	chr12	-	11273608	11276922	intronic	uc001qzf.2	PRB4	AAGGGGAATAAGACTGCATCTGTTCATATGAGGTAATGATGGAGTTCAAAGGCACAGAGC
ASCRP3000696	98	113.5	142	58	66	87	104	137	186	175	250.5	184	hsa_circRNA_103224	hsa_circ_0063329	circBase	chr22	-	38894089	38894578	exonic	NM_006386	DDX17	AAGGGGAGATGGCCCAATCAATATGTAATGGATGTGTTGATGGATCAGCACTTTACAGAA
ASCRP3000697	63.5	186.5	238	95	86	44	88	168	74	5097	133.5	2467	hsa_circRNA_001264	hsa_circ_0000086	circBase	chr1	-	76694158	76694273	antisense	NM_152996	ST6GALNAC3	AAGGGGGCTTCACATGGTTTTAAAATGTGCTGCTGTGGTTTGACCTAGAGTACAAAATAG
ASCRP3000698	43.5	35	30	41	43	56	43.5	38	34.5	122	92	72.5	hsa_circRNA_405921		25070500	chr2	+	85241058	85255179	exonic	ENST00000456682	KCMF1	AAGGGTAGATTTTGGCCAGAGGTCCCTGTTGCTGTGCATATATTATTAGCCGAGTATATG
ASCRP3000699	22	22	19	19.5	26	41	29	26	29	70	75	58	hsa_circRNA_406298		25070500	chr3	-	69037419	69038168	intronic	ENST00000295571	EOGT	AAGGTAATGGATACACTGCGGATTCTGAGAGTTCTTACGGATATGGTGACCTATTCTCCG
ASCRP3000700	34	28	25	30	34	264	52	80	80	475.5	832	446	hsa_circRNA_102595	hsa_circ_0052095	circBase	chr19	+	52785363	52786666	exonic	NM_001010851	ZNF766	AAGGTATCAAAGATATCAACACAGGGACACTTGACATTCAGGGACGTGGCCATAGAATTC
ASCRP3000701	27	25	22	25	24	49	65.5	371.5	187.5	124	117	81.5	hsa_circRNA_000155	hsa_circ_0000155	circBase	chr1	+	168007608	168014465	exonic	NM_018442	DCAF6	AAGGTATCGAGCAGGACCTGGTGATAGATAACAATAATGAAAAGCTGAGCCCCAAACCAG
ASCRP3000702	20.5	21.5	23	23	18	96.5	41.5	61	53	134	185	149.5	hsa_circRNA_002533	hsa_circ_0002533	circBase	chr10	+	114286845	114298089	exonic	NM_145206	VTI1A	AAGGTCATCTCGGAGACTAGAGGCTGGATACCAAATAGCAGTGGAAACCGAAAAGGTCAC
ASCRP3000703	135	31.5	31	118.5	36	2794	560.5	1888	1376	6523	11186	8549	hsa_circRNA_101533	hsa_circ_0003713	circBase	chr15	-	59204761	59205895	exonic	NM_024755	SLTM	AAGGTGAAGATGATACCTTTCTAACAGCCCAAGACTGTGAATTGGAGAATCAAGAGGCAC
ASCRP3000704	80	121.5	106	57	51	340	102.5	145	134	265.5	488	312	hsa_circRNA_406193		25070500	chr22	-	36872786	36872903	sense overlapping	NM_012473	TXN2	AAGGTGGATATTGATGACCACACAGACCTCGCCATTGAGTGGTGTGGACCCTGCAAGATC
ASCRP3000705	1330	4059.5	2859	1503	315	8257.5	1620	1725	392	7565	6600	5317	hsa_circRNA_036783	hsa_circ_0036783	circBase	chr15	+	90800369	90815443	exonic	uc002bpe.1	TTLL13	AAGTAAAATGTAGCAGTCCCCCTCCTCATTGATGGCTTCAAGTTTGATATGCGAGTCTAC
ASCRP3000706	25	26	19	25.5	26	41	31	22	20	78	60	60	hsa_circRNA_033075	hsa_circ_0033075	circBase	chr14	-	95552564	95557000	exonic	NM_030621	DICER1	AAGTAAATCTCCAATAAAGTTATCGTCTGTTCACCCGGCTGAGAGAACTTACGACGGGAA
ASCRP3000707	23	26	23	27	25.5	32	38	166	92	62.5	83.5	68	hsa_circRNA_005202	hsa_circ_0005202	circBase	chr9	-	88190229	88211364	exonic	NM_015239	AGTPBP1	AAGTAACTAGGTATGCAACCACTCATGTATTCGGTTCAGGAAGCATTAAATGCCAGACCA
ASCRP3000708	24	23	21	31	31.5	55	50	115	72	123.5	138.5	117.5	hsa_circRNA_008337	hsa_circ_0008337	circBase	chr8	-	62546241	62596747	exonic	NM_004318	ASPH	AAGTAAGCATTTTTCCTGTGGAAGAACAGCAGGAAGTACCACCAGAGACAAAGCATGGAG
ASCRP3000709	37.5	29	29	24	25	1996	69	137.5	141	968	1800	1127	hsa_circRNA_001621	hsa_circ_0001621	circBase	chr6	+	90556280	90566918	exonic	NM_012115	CASP8AP2	AAGTAATCTTCACCAAAGGTGGTGACTCTCAAAAGGAAATAGGATCATGGCAGCAGATGA
ASCRP3000710	47	238	306.5	64	48	315	258.5	706	246	584	1086	675	hsa_circRNA_104400	hsa_circ_0006944	circBase	chr7	+	74119495	74131270	exonic	NM_001518	GTF2I	AAGTACCAGCAGAAGGTGGTCGTGTGATGGTAACAGATGCTGACAGGTCAATACTATCTC
ASCRP3000711	21	22	20	18.5	22	39.5	35	59	35	100	148.5	124	hsa_circRNA_000115	hsa_circ_0000115	circBase	chr1	-	115276352	115280693	exonic	NM_007158	CSDE1	AAGTACCCAGTAAAAACCAGATGATGTTGAATTTGAAGTATCATCGGACCGACGGACTGG
ASCRP3000712	61	92.5	75	85	61	155	83	75	74	219.5	198.5	175	hsa_circRNA_100172	hsa_circ_0011615	circBase	chr1	+	36354027	36360003	exonic	NM_012199	AGO1	AAGTACCGCGTGTGTAATGTTACCCGTCGCCCTGCTAGCCATCAGACCTGCGGGCGCTTA
ASCRP3000713	22	22.5	20.5	22.5	24	49.5	36	50	37	101	106	90	hsa_circRNA_091025	hsa_circ_0091025	circBase	chrX	+	70642966	70644088	exonic	NM_004606	TAF1	AAGTATAATGAAAGAAGACAAATTAGCTCGCTTAGAGAAAGCTATCAACCCCTTGCTGGA
ASCRP3000714	89	55	37	103	144	115.5	82	72	80	157	271	203	hsa_circRNA_043781	hsa_circ_0043781	circBase	chr17	-	40359575	40369482	exonic	NM_012448	STAT5B	AAGTATACTCCAAATACTACACACCAGTTCCCTGCGAGTCTGCTACTGTGATTACAGTGG
ASCRP3000715	24	23	21	25	27	36	29.5	22	26	95	77	75	hsa_circRNA_000814	hsa_circ_0000381	circBase	chr12	+	25214525	25222365	exonic	uc001rgg.2	LRMP	AAGTATGGAACAACAATTGAGTCACTTCAAAAGGAGTTCATTGAAGGGGAACACCATGGC
ASCRP3000717	45	43	38.5	49	54	160	44	37	35	177	238	214	hsa_circRNA_000459	hsa_circ_0000459	circBase	chr12	+	124091978	124101150	exonic	NM_020936	DDX55	AAGTCAACTGGGTTTTGCAGTATGACCCTCCCAGCAATGCAAGGTTGGAGCCATAATCAT
ASCRP3000719	33	59	57.5	35	33	40	57	116	76	71	59	49	hsa_circRNA_402813		25242744	chr3	-	31871531	31921322	exonic	NM_017784	OSBPL10	AAGTCAGAGAGGTACTTCGTACTGGATTTCGAGGCTGGCATCCTGCAGTATTTTGTGAAT
ASCRP3000720	31	33	27	26	28	99	44.5	30.5	37	125	231	161	hsa_circRNA_100749	hsa_circ_0020927	circBase	chr11	+	3988781	4045217	exonic	NM_003156	STIM1	AAGTCATCAGAAGAGTTTTGCCGAATTGACAAGCCCCTGTGTCACAGTGAGGATGAGAAA
ASCRP3000722	50	32	30.5	63	49	206	157	486	450	181	538.5	351	hsa_circRNA_040822	hsa_circ_0040822	circBase	chr16	+	88061088	88069000	exonic	NM_017869	BANP	AAGTCCAGATCACGCAGGACAGCGAGGTCACCTTTTCTATAAATTTGGCATCACAGAATC
ASCRP3000723	25	20	22	27.5	24	151.5	52	161	81	390.5	519	414	hsa_circRNA_405236		25070500	chr14	+	56122759	56125332	exonic	NM_004986	KTN1	AAGTCCCAAATTGAGCAGCTTAAACAACAAAACTACCAACAGGTTGAAAGAAAAGGAAAA
ASCRP3000724	60	118	114	47.5	45	61	77	86.5	184	79.5	96	80	hsa_circRNA_103162	hsa_circ_0062317	circBase	chr22	+	20754921	20755662	exonic	NM_003426	ZNF74	AAGTCCCCAGAGGGCCCTGTCCAGGAATCGGTGAGTTTCAAGGATGTGGCTGTGGACTTC
ASCRP3000725	33.5	28	34	47	43	70	45	228	104	154	111	103	hsa_circRNA_103655	hsa_circ_0007883	circBase	chr4	-	73956383	73958017	exonic	NM_032217	ANKRD17	AAGTCCCTCAGGGGTGGCACTGAATCAACAAGACAAGCAACTCAATTGATTAATGCTTTG
ASCRP3000726	52	36	38	81.5	86	2095	236	1468	890	3024	6084	4258	hsa_circRNA_007054	hsa_circ_0007054	circBase	chr1	+	25666964	25678184	exonic	NM_014313	TMEM50A	AAGTCCGAGGTGATAGTTACAGTGAAGGTTGTCTGGGTCAAACAGTGACCTGAAAAAAAT
ASCRP3000727	22	23	20	26	19	50	31	27	25.5	127	151	116	hsa_circRNA_104546	hsa_circ_0083176	circBase	chr7	+	157174939	157178305	exonic	NM_058246	DNAJB6	AAGTCCTTAACAATAAATGAAGACCCTTTTGAGGACTTCTTTGGGAATCGAAGGGGTCCC
ASCRP3000729	41	37	34	24	21	39	142.5	1700	668.5	215	202	187	hsa_circRNA_101543	hsa_circ_0000607	circBase	chr15	-	62299506	62306191	exonic	NM_017684	VPS13C	AAGTCTCAGAAGAAATACAGAAAGAAATTCAGACTGCAAATGAACACTGGACTCCATGCA
ASCRP3000730	50.5	43	63.5	258	182	33	52	40	41	69	71	64	hsa_circRNA_406246		25070500	chr3	-	27424643	27493989	exonic	NM_003615	SLC4A7	AAGTCTCTTGCAAATTCCAGTCAAGGCCCTAAAATATAGGGTCCTGATGAAGAAGCTGTT
ASCRP3000731	61	232	266	69.5	62	57	166	218	183	123.5	111.5	94	hsa_circRNA_103674	hsa_circ_0070113	circBase	chr4	+	79186178	79188586	exonic	NM_025074	FRAS1	AAGTGACCTGCCAGACTGGAGAGTGTGCCAAAGTGGAGTGTGCCCGGGATGAGACTGTAG
ASCRP3000732	38	48	34	31	27	219	50	55	51	261.5	289	193	hsa_circRNA_086441	hsa_circ_0086441	circBase	chr9	-	19063005	19063578	exonic	NM_017645	HAUS6	AAGTGATCCATTTCAAAAAGAGCAAGATCATCTGGTAGAAGAGCCCTGCCTCTTTCTTGT
ASCRP3000734	22	22	19.5	22	21	38.5	28	29.5	26	63	118	84	hsa_circRNA_100612	hsa_circ_0008523	circBase	chr10	+	70723046	70726959	exonic	NM_004728	DDX21	AAGTGGAAGAGATTTTAAGTGTGGCATACAAGAAAGGCCGAGGAGTGACCTTCCTATTTC
ASCRP3000735	32	26	19	29	24	148	66	159	96.5	179	556	323.5	hsa_circRNA_405713		25070500	chr19	+	2189730	2194576	exonic	NM_032482	DOT1L	AAGTGGATGAAATGGTATGGAAAAAAGCATGCAGAATACACACTTCGAGAGCATGCAGAG
ASCRP3000736	30	24	25	27	27	59	62	239	147	188	295	239	hsa_circRNA_101708	hsa_circ_0006979	circBase	chr16	-	11940357	11941663	exonic	NM_015659	RSL1D1	AAGTGGTTCTTGCAGGACCTTGCCTCATAGTATTCGATCAGATTCAGAAGATATCTGTTT
ASCRP3000738	21	27	18	19	20	31	30	37	27	60	63	60	hsa_circRNA_071511	hsa_circ_0071511	circBase	chr4	+	184605127	184615876	exonic	NM_021942	TRAPPC11	AAGTGTCACAAGGTTTTGATCTTTCTGATCCTGAAAAAGAAAAGGTGGGAATTCTTGCCA
ASCRP3000739	104	80	82	185.5	193	235	82	70	58	520.5	460	326.5	hsa_circRNA_022358	hsa_circ_0022358	circBase	chr11	-	61556601	61560085	exonic	NM_014206	TMEM258	AAGTGTCCCACCTGCTGCTCATAATAAATGCAGATGTATAGCACCTGCCGACGTGTTCTT
ASCRP3000740	21	22	20	22	21	72	51	72	72	172.5	317	189	hsa_circRNA_002765	hsa_circ_0002765	circBase	chr10	+	31644075	31676727	intronic	uc010qeg.1	ZEB1	AAGTGTGGAAGCAAAGGTCATCTAATCTTTAAAAGCTGTTTAAGGAAGACAGAGCAGGCA
ASCRP3000741	362	375.5	312	500	427	1588	331	307.5	308	1270	1387	1063	hsa_circRNA_005629	hsa_circ_0005629	circBase	chr5	-	156919980	156921803	exonic	NM_033274	ADAM19	AAGTGTGGCTACAACCATGAGCCCGACCTGCCCCTGACCTCTGCTTCGAGAAGGTGAATG
ASCRP3000742	23	27	22	34	23	596	80	355	242.5	1052	2474	1362.5	hsa_circRNA_001682	hsa_circ_0001682	circBase	chr7	-	23023562	23030758	exonic	NM_032581	FAM126A	AAGTTATCCAGGAGCCACAAAGTGAGGTTGAAGGTTTAGAACAGATGTGGAAAAATGTTT
ASCRP3000743	24.5	23	20.5	23	25	37	27	21	26	63.5	59.5	53	hsa_circRNA_406345		25070500	chr3	+	128060075	128077216	exonic	NM_021937	EEFSEC	AAGTTCAAGATCCACATCCCAGGTGGTGAAGAAGGTGAAGTCCATGCAGATGTTCCACAT
ASCRP3000744	23	23	20	22	19	153	65.5	378.5	172	270	537	313	hsa_circRNA_103842	hsa_circ_0072547	circBase	chr5	+	56542126	56546968	exonic	NM_022913	GPBP1	AAGTTCACTTGAGGCAGAACACAGAATATCCTCCGAATCCTAAATCTAGAGCTCCAAGGA
ASCRP3000745	22	21	19	27	25	37	41	148	60	67	76	75	hsa_circRNA_100639	hsa_circ_0019005	circBase	chr10	-	88211723	88221044	exonic	NM_015045	WAPAL	AAGTTCATGCTGTCCAGGCTTTAGTGCAGACTGGGCATTTAGCTATGGAGACATTATTAT
ASCRP3000746	27	27	28	28.5	29	97	76.5	151	128.5	181	367.5	261.5	hsa_circRNA_100828	hsa_circ_0022308	circBase	chr11	-	61096834	61097546	exonic	NM_001923	DDB1	AAGTTCCTATATGGTTGCCAAGCACCTACTATTTGCTTTGTCTACCAGGGGGAGAGCAAG
ASCRP3000747	31	22	18.5	37	19	715	173	562	394.5	2325	4962	3344	hsa_circRNA_102851	hsa_circ_0008032	circBase	chr2	+	172782046	172809519	exonic	NM_003642	HAT1	AAGTTGATGAGAACTTTGACTGTGTAGAGGATTTGGTGCTATGGAGAAATTTTTGGTAGA
ASCRP3000748	44	51	39	38	26	228	394	3006	716	470	1170	755	hsa_circRNA_100924	hsa_circ_0000347	circBase	chr11	-	85722072	85742653	exonic	NM_007166	PICALM	AAGTTGCAGAGACTTAATTCAGTGCACAAATGAGATGAATGTGAACATCCCACAGTTGGC
ASCRP3000749	37	51	54	53	45.5	42	61	69	54	93	75	56.5	hsa_circRNA_101167	hsa_circ_0005916	circBase	chr12	+	117402501	117426674	exonic	NM_012174	FBXW8	AAGTTGCTTTTGGTGTACAGGGTCTGGGATGGGTGTACGAAGGAAGCAAGATATACATCA
ASCRP3000751	20	23	22	23	22.5	32	36	26.5	30	79	75	75	hsa_circRNA_005965	hsa_circ_0005965	circBase	chr4	-	108603170	108615162	exonic	NM_005443	PAPSS1	AAGTTGTGGAACTTCTACAGGAACGGGCTTGTCTGGAGCGGGAAAGACTACTGTGAGCAT
ASCRP3000754	23	19.5	19	22.5	20	40	34	55	47	81	114	96.5	hsa_circRNA_404937		25070500	chr11	+	114388277	114411482	sense overlapping	ENST00000459372	snoU13	AAGTTTTGGTGGGAAGATGAAACTTGGAAGAAGGTGCCATTAAGAGGAGATACACAGAGA
ASCRP3000755	58	34	35	97	79	31	77.5	93	85	100	97	85	hsa_circRNA_100601	hsa_circ_0007113	circBase	chr10	-	69785302	69804320	exonic	NM_015601	HERC4	AAGTTTTTGAACTTATGGGAAGCATTGTCACTGAGATTGCTTGTGGACGAGCAGGTTGTT
ASCRP3000757	31	28	27	32	33	41	40	25.5	30	92	91	82.5	hsa_circRNA_041630	hsa_circ_0041630	circBase	chr17	-	4848946	4849292	exonic	ENST00000225655	PFN1	AATAAAAAAGATTCTACTAACAACGCTAGTCCTGCTGATGGGCAAAGAAGGTGTCCACGG
ASCRP3000758	32	40.5	38	27.5	28	61.5	50	82.5	95	98	92	72	hsa_circRNA_063313	hsa_circ_0063313	circBase	chr22	-	38879442	38891942	exonic	NM_006386	DDX17	AATAAAAACACTGTTGACAATAATGTCTAGTTCTGGCTCCTACCAGAGAGCTTGCCCAGC
ASCRP3000759	44	103	153	50	39	45	162	204.5	104	795	101	347	hsa_circRNA_043602	hsa_circ_0043602	circBase	chr17	-	39679868	39925459	exonic	uc010wfs.2	JUP	AATAAAAATTTATGGTCCAAGGGAGTGGTGGTGACCAAGGCGGCCATGATTGTGAACCAG
ASCRP3000760	140	182	162.5	165	110	630	98	122	93	265	378.5	278	hsa_circRNA_023143	hsa_circ_0023143	circBase	chr11	+	67803928	67804114	exonic	NM_002496	NDUFS8	AATAAAACCACTCCGACCCCACGGGGCCCCAACTTTGAGTTCTCCACGGAGACCCATGAG
ASCRP3000763	36.5	34	32	37	32	261	58	48	32	237	397	318.5	hsa_circRNA_039830	hsa_circ_0039830	circBase	chr16	-	67471916	67477081	exonic	NM_004691	ATP6V0D1	AATAAAACTGCCCTCTCTAAGGCCAACTGTCCGGCTTTTTTCCAGGACTGCATTTCAGAG
ASCRP3000765	29	25	21	25	25	37	34.5	22	21	76.5	72	70	hsa_circRNA_406651		25070500	chr5	+	115781859	115785513	sense overlapping	NR_109879	SEMA6A-AS1	AATAAAAGGCAGTCAAGGCAATTCACCATAAGGAAAGAGTGTACAAGACGGTTGGAACGC
ASCRP3000767	23.5	24	23	27	31	53	42	73.5	50	182	365	238	hsa_circRNA_070660	hsa_circ_0070660	circBase	chr4	+	110580166	110585550	exonic	NM_017918	CCDC109B	AATAAAATAGCATATGATGTGCAGTGTCCAAAGAGAGGTTTTGCGTGTGAAGCTGTGTGG
ASCRP3000768	31	27	22	34	41.5	52	31	20	26	77.5	80	73	hsa_circRNA_043366	hsa_circ_0043366	circBase	chr17	+	36909402	36920478	exonic	uc002hqr.3	PSMB3	AATAAAATAGCCTGTCTTTCATCTATTATGTCCTATAACGGAGGGGCCGTCATGGCCATG
ASCRP3000769	23	24	20	23	25	40	29.5	20	23	66	71	69	hsa_circRNA_405529		25070500	chr17	-	3721934	3724538	intronic	ENST00000158149	C17orf85	AATAAAATGTCAGGGATGGGAACCCCACCTTTTAAAAAGGTCACCGATTTGCCTGCTCAG
ASCRP3000770	35	29.5	23	31	34	62.5	45	29	30	77	119	90	hsa_circRNA_023617	hsa_circ_0023617	circBase	chr11	+	75116657	75116733	intronic	ENST00000527446	RPS3	AATAAAATTTTGTACAAAGACAGGTCTCCTTGGCAGCTGTATTCTGGAGTCTGGATGTTG
ASCRP3000772	43	39	26	35	49	51	35	23	35	69	74	65.5	hsa_circRNA_076700	hsa_circ_0076700	circBase	chr6	-	47199267	47254331	exonic	uc003oyv.3	TNFRSF21	AATAAACATTAGGTGTTTGTTACTTGGATTCCTTAGCACCACCACAGCTCAGCCAGAACA
ASCRP3000774	27.5	29	26	19	21	44	29	22	27	65	57	60	hsa_circRNA_054937	hsa_circ_0054937	circBase	chr2	+	63816284	63834330	exonic	NM_001199111	MDH1	AATAAATATATATTCAAATGAACCTTCGCGCCCTTTGGCAAGCTCGGACTCATCTTCTGG
ASCRP3000777	31.5	32	26	27	31	37	38	30	35	66.5	59	61	hsa_circRNA_402255		25242744	chr2	+	55040368	55056614	exonic	NM_001039753	EML6	AATAACCAAAATTGATCTCAGGGAGACAGAACAAGGATACAAAGCCTTGCCTTACACCCA
ASCRP3000778	41	39	33	34	30	567	83	179.5	128.5	838	1358.5	806	hsa_circRNA_104584	hsa_circ_0083861	circBase	chr8	-	30557597	30560757	exonic	NM_000637	GSR	AATAACCAGCGATGGATTTTTTCAGCTGGAAGAATTGCCCGGTCCCATATAGAAATCATC
ASCRP3000779	30	47	48	30	26.5	85	43	59	61	82.5	122.5	106	hsa_circRNA_103610	hsa_circ_0002785	circBase	chr4	-	22403053	22404422	exonic	NM_145290	GPR125	AATAACCCAGACTAGGAATGCCAGCATCTGCCAAGCAGATTTGACGGGATCTGAACTATA
ASCRP3000782	25	25	22.5	22	23	34	28	22	22	65	64	67	hsa_circRNA_405370		25070500	chr15	+	65160809	65160998	intronic	ENST00000437723	AC069368.3	AATAAGAATAGTACAAAGGCCATGCCACCTTGTGCAGCATTCTGTTCTTGCTAAACTCAG
ASCRP3000783	40	29	25	55	59	1861.5	92	177	178	2909	7862	4731	hsa_circRNA_100324	hsa_circ_0013966	circBase	chr1	+	147438785	147460753	exonic	NM_016334	GPR89B	AATAATCATCGTCACATCCATCAGAGGATTGCTGATCACTCTTACCAAGGATGGCAATGG
ASCRP3000784	20	24	21	19	19	61	31	25	25	85	85.5	66	hsa_circRNA_000570	hsa_circ_0000570	circBase	chr14	+	103352525	103363738	exonic	NM_003300	TRAF3	AATAATGAATCCAAAATCCTTCATTTACAGAAACACGAAGACACCGACTGTCCCTGCGTG
ASCRP3000785	40	21.5	21	44	49	34	31	21	22	63	53	60	hsa_circRNA_045579	hsa_circ_0045579	circBase	chr17	+	73008779	73017356	exonic	uc002jmm.3	ICT1	AATAATGCACCTCATGTATTAGTCACAATAAAAATCAGAACTCAGCATGGCGGCCACCAG
ASCRP3000786	53	25	27	41	31	4192.5	68	148	194	4478	10286.5	6839	hsa_circRNA_039254	hsa_circ_0039254	circBase	chr16	+	47497792	47581459	exonic	NM_001031835	PHKB	AATAATGGCAGCACAGAGCTACATTCGAGTTTTAAAATTGCTATAGCTTAGCCTGCGACG
ASCRP3000787	25	24	19.5	23.5	25	50	29	28	33	84.5	122	101	hsa_circRNA_103053	hsa_circ_0007094	circBase	chr20	-	35288739	35299800	exonic	NM_022477	NDRG3	AATACAACTTTGCTAAAGCTCTCTGGCCTGACAACCAATGTTGTGGACATTATTTTGGCT
ASCRP3000789	32	58	47	27	27	37	51	92.5	92	64	56	64	hsa_circRNA_404988		25070500	chr12	-	29884739	29911710	sense overlapping	NM_175861	TMTC1	AATACAGAACCATATGGGAATTCATATTCTGGCTTGGAAGAATTAGGTGGCTGGGATCGT
ASCRP3000790	30	22	22	25	25.5	410	56	393	212	565	917	676	hsa_circRNA_103030	hsa_circ_0005868	circBase	chr20	+	33057852	33069011	exonic	NM_031483	ITCH	AATACATCAGAGACAATGGACCTCAGATAGCCTATGTTCGGGACTTCAAAGCAAAGGTTC
ASCRP3000791	67	164	170.5	79	54	44	178	144.5	177	103	112.5	98	hsa_circRNA_025984	hsa_circ_0025984	circBase	chr12	-	46751970	46754992	exonic	NM_018976	SLC38A2	AATACATGCTTAATCCTGAGCTTTGTTCTTCCTGTTAAGTGGTGTACTGGTGATGACCGG
ASCRP3000793	77	75.5	33	28	28	106	127	38	86.5	205	233	169.5	hsa_circRNA_042882	hsa_circ_0042882	circBase	chr17	+	29483000	29533389	exonic	NM_000267	NF1	AATACGAATGGCACCGCTTCCAATAAAAACAGGACAGCAGAACACACATACCAAAGTCAG
ASCRP3000794	21	23	22	23	30	110	78	538.5	257	383	731	520.5	hsa_circRNA_400828		25242744	chr11	-	108057208	108061227	exonic	NM_002519	NPAT	AATACGGAATTTCCAAGATCCAAACGCTTTTGCAGTAGAAAAAGAGCATGCAAAGTTCCC
ASCRP3000797	74	35	35	121	55	679	100	123.5	63	1037	1645.5	1158	hsa_circRNA_102898	hsa_circ_0005307	circBase	chr2	+	204154487	204157049	exonic	NM_177538	CYP20A1	AATACTTGGCCATCTCCACACAAATATTGTCAGCATGTGCTTTGTGAAACTGTTCGAACT
ASCRP3000798	33	22	19.5	30	26	220	110	231	111	655.5	1504	944	hsa_circRNA_100599	hsa_circ_0018403	circBase	chr10	-	52220432	52350007	exonic	NM_147156	SGMS1	AATACTTTTAAAGGAACCTGTTGATAAATGCAAAACAGTGGCTGTTGCAGCGTGACGACA
ASCRP3000799	32	25	23	31	23.5	89	175	508	223	397	768	551	hsa_circRNA_405210		25070500	chr14	+	39648294	39648666	exonic	NM_002687	PNN	AATAGAAGAGTCACAGAGAAAAATGAACGCAAAAGCGGCGCCAGGAAATTGAACAAAAAC
ASCRP3000800	48	40	43	48	52	44	86.5	62.5	107	93	80	72.5	hsa_circRNA_001035	hsa_circ_0001035	circBase	chr2	-	85554139	85554349	sense overlapping	NM_006464	TGOLN2	AATAGACGGGCCCAGCAAGTCGGGTTCGGAGGCGCAGACCACAAAAGATGTCCCTAATAA
ASCRP3000801	124	114	74	92	59.5	236	93	105	132	259.5	257.5	240	hsa_circRNA_400455		25242744	chr1	-	235409734	235424067	exonic	NM_016374	ARID4B	AATAGAGGAAGAAGATCTAATCATATGCCCTTGATGAGCCTCCCTATTTGACAGTGGGCA
ASCRP3000802	22	22	20	29	22	444	38	56	63	1493	3153	2119.5	hsa_circRNA_008608	hsa_circ_0008608	circBase	chr8	-	95897294	95897786	exonic	NM_057749	CCNE2	AATAGCTCAGGAAATCTATGCTCCTAAACTCCAAGAGTTTGCTTACGTCACTGATGGTGC
ASCRP3000804	24	23	20	24	22	42	32	21	27	73	73	53	hsa_circRNA_002045	hsa_circ_0000399	circBase	chr12	-	49053687	49054402	intronic	ENST00000546701	KANSL2	AATAGTATATATATTTGTCAGGATACGAATCAGGTTCTCTTCAAGTGCTGCCAGGGATCT
ASCRP3000805	58	42	34	55	51	91	43	34	39	92	97	91	hsa_circRNA_405732		25070500	chr19	-	11521928	11527733	exonic	uc002mrm.2	RGL3	AATAGTTGTTTCTTCAAATTGAAATCCAAAGATCTACTCAAGGCTCCCAGCCCCATTGCC
ASCRP3000806	195	162.5	127	181	172.5	594	124.5	125	115.5	625	463	464	hsa_circRNA_036272	hsa_circ_0036272	circBase	chr15	-	74738317	74742410	exonic	NM_032907	UBL7	AATATACCTGATGGTCAACTCTCGTTGGTGCCTGCTCACCCAGCCCTCGTCAATGCCATT
ASCRP3000807	27	22	21	26	27	31	29	21	23	61.5	49.5	46	hsa_circRNA_024529	hsa_circ_0024529	circBase	chr11	+	118943907	118944661	exonic	NM_021729	VPS11	AATATATCCGGTCAGAGTTTACCAGCAGGGATTCACAGAGCTCCGACAAGCAGATTCTAA
ASCRP3000808	24	26	27	37	35.5	56	32.5	27	23	90	91	84	hsa_circRNA_100940	hsa_circ_0006286	circBase	chr11	+	102076623	102080295	exonic	NM_001130145	YAP1	AATATCAATCCCAGCACAGCAAATTCTCCAAAATGTCAGCCATGAACCAGAGAATCAGTC
ASCRP3000809	51	43	38	65	59	84	51	46	37	150	127	105	hsa_circRNA_024596	hsa_circ_0024596	circBase	chr11	-	119545868	119549475	exonic	NM_002855	PVRL1	AATATCACAGGCGTCCACTCCCAGGTGGTCCAGGTGAACGACTCCATGTATGGCTTCATC
ASCRP3000810	59.5	62	53	98	42	7109	627	3791.5	2554.5	14023.5	26931	17633	hsa_circRNA_103887	hsa_circ_0002490	circBase	chr5	+	72370568	72373320	exonic	NM_138782	FCHO2	AATATCAGCAGACTAGAGCAGATTCTTCCAAATGCACAGCTTGTGTTCAGGTGTGTCACG
ASCRP3000811	46	35	32	40	28	208	84.5	186	134	207	335	246	hsa_circRNA_101699	hsa_circ_0004344	circBase	chr16	-	9023225	9024254	exonic	NM_001286458	USP7	AATATCTGAGGAAGCGGGAGATACAGATGACCCACCAAGAATTACTCAGAACCCTGTGAT
ASCRP3000812	50.5	31	27.5	44	31	1626	127	411	329	2647.5	5397	3386	hsa_circRNA_001810	hsa_circ_0001810	circBase	chr8	-	71071739	71075089	exonic	NM_006540	NCOA2	AATATCTTTACATATGCTTCACAGGCAAGATCACGTCTCTGGATACCAGCACCATGAGAG
ASCRP3000813	24	25	25	31	59	32	35	28	26	67.5	57	50	hsa_circRNA_400413		25242744	chr1	-	224481968	224491559	exonic	NM_002533	NVL	AATATGCCTAGGTATCCCAGATGAAGCATCCAGGGAAAGGAGGTCTGCAAGATGCTCATA
ASCRP3000815	26	22	22	22	20	53	35	24	22	93	76.5	62	hsa_circRNA_039183	hsa_circ_0039183	circBase	chr16	+	31885078	31928627	sense overlapping	NM_003414	ZNF267	AATATGCTCTTTGTGTTTGAATAAAGTAGTAATGCATGTAAACAGGAGAGCAGGGGCGGC
ASCRP3000817	48	42	30	37	35.5	60	39	28	39	83	74.5	83	hsa_circRNA_039466	hsa_circ_0039466	circBase	chr16	+	56660791	56661024	exonic	NM_175617	MT1E	AATATGTGACTGACAATAAAAACAATTTTGACTTTAAGCTGCTGTTCCTGCTGCCCCGTG
ASCRP3000818	26	20	21	35	34	40	35.5	54	40	79	122	94.5	hsa_circRNA_018100	hsa_circ_0018100	circBase	chr10	-	32141444	32150586	exonic	NM_018287	ARHGAP12	AATATTACTACAGTGCAGACGGATCTCGGTCAGAATGGGAATTGCCAAAGGCAACCACAC
ASCRP3000819	114.5	153	117	191	125.5	1053	333	420	178	996.5	1115	958	hsa_circRNA_101869	hsa_circ_0005016	circBase	chr16	+	71954641	71957283	exonic	NM_014761	IST1	AATATTCATCCACCTCAGATACCAGCAACTCCCCCATCGTATGAATCTGTTGCTGATCAG
ASCRP3000820	59.5	47	40	57	63.5	102.5	185	457	264	470.5	851	549	hsa_circRNA_018224	hsa_circ_0018224	circBase	chr10	+	38724057	38734535	exonic	NR_024497	LINC00999	AATATTTGGAATTTTCGTATACGTGGATTCCAGAGGGGTGACAGCAAAACAAACAGGACC
ASCRP3000821	50.5	50	39	52	69	98	153	384	233	458	787.5	517	hsa_circRNA_082178	hsa_circ_0082178	circBase	chr7	+	128281294	128289036	exonic	NR_024368	LINC01000	AATATTTGGAATTTTCGTATACGTGGATTCCAGAGGGGTGACAGTGAAACAAGCACCTGT
ASCRP3000822	43.5	44	37	46	66	99	145	359.5	226.5	441	750	463	hsa_circRNA_017202	hsa_circ_0017202	circBase	chr1	-	243222779	243242354	exonic	NR_029401	LINC01347	AATATTTGGAATTTTTGTATACGTGGATTCCAGAGGGGTGACAGCGAAACCTGGACCTAC
ASCRP3000823	35	50	45.5	34	32	153	50	49	52	237	234.5	197	hsa_circRNA_406971		25070500	chr7	+	79818266	79842185	exonic	NM_002069	GNAI1	AATCAAAAAGAGCCCTCTCACTATATGCTATCCAGAATATGCAGGTGCTGGTGAATCTGG
ASCRP3000824	24.5	21	19	28	24	145	80	409.5	251	496	951	695	hsa_circRNA_006868	hsa_circ_0006868	circBase	chr11	-	107260799	107289013	exonic	NM_152434	CWF19L2	AATCAAAACAAGCTCTTTATGAGAATGGCATCTAAGCAGTCCAGAGCGTGAGTCCATTCA
ASCRP3000825	25	20	20	25	25	31	27	25	25.5	59	48	54	hsa_circRNA_406267		25070500	chr3	-	42798557	42799843	exonic	NM_144719	CCDC13	AATCAAACACCTCAAAAAGAAAATAGAAGAGGACAGATTTGCCTTCACAGGGCAGGATGG
ASCRP3000826	20	21	21	18	20	38	26	31	21	66.5	87	78	hsa_circRNA_002866	hsa_circ_0002866	circBase	chr19	-	9767222	9771550	exonic	NM_017656	ZNF562	AATCAAATATTCACTGGGATACAAATGGGCCTCAGATAACCCTGTACAAAGGGGAATGGA
ASCRP3000827	30	24.5	21	33	39	34	31	41	28	74.5	57	49.5	hsa_circRNA_404971		25070500	chr12	+	20251685	20280587	sense overlapping	NR_040098	LOC100506393	AATCAAGATGGAAACTTCAGGCTACCATACCTGCTTCAACTGTAGGAGAATCTTAGTTCT
ASCRP3000828	37	42	31	34	31	133	66	55	33	154	146.5	111	hsa_circRNA_043614	hsa_circ_0043614	circBase	chr17	-	39738530	39743147	exonic	NM_000526	KRT14	AATCAATACAGCTTCATTATCTGAGTTGCATAAACCCGAGCACCTTCTCTTCACTCAGCC
ASCRP3000829	20	21	18	19.5	18.5	37	30	35	43	70	66	65	hsa_circRNA_402843		25242744	chr3	+	45744929	45765035	exonic	NM_014016	SACM1L	AATCAATCTGGCATATCACACCTGAAAAATTTTATGTGGAAGCTTGTGATGATGGAGCAG
ASCRP3000830	101	73	85.5	128	116	178	97.5	146.5	77	264.5	322	269	hsa_circRNA_404578		25070500	chr1	+	150307405	150312953	exonic	NM_004698	PRPF3	AATCACAAATCTTGTTGAACATCCAGCCCAGCTCAATCCTCCAGGAAGGTGGAGTTAAAA
ASCRP3000831	23	21.5	17	29	48	44	37	107.5	50	66	68	67	hsa_circRNA_008822	hsa_circ_0008822	circBase	chr19	-	52364156	52390165	exonic	NR_024181	ZNF577	AATCACACCTCATTGCAGTTGAGCATTTTTGTCATCTGCAAATAATTTTAGCCAGGTGGC
ASCRP3000832	311	396.5	247	422	195.5	370	764	974	283	575	783.5	514	hsa_circRNA_404514		25070500	chr1	+	53222129	53250725	exonic	NM_024646	ZYG11B	AATCACCAGCAGGAGGAGGCGTCTCCCTATTCCTTACTTGATATCTGCTTGAATTTCTTG
ASCRP3000833	33	29	24	28	25	58.5	77	123	61	113	188.5	139	hsa_circRNA_072654	hsa_circ_0072654	circBase	chr5	+	64084777	64100213	exonic	NM_005869	CWC27	AATCAGCTGGAGAAGGAGAAGTGGAGAAGAAATCAGTCAGCCGCAGAAATTTTAGTTTAC
ASCRP3000834	45	49	40	32.5	28	86.5	51	36	44	107	101	92.5	hsa_circRNA_104463	hsa_circ_0082002	circBase	chr7	+	116339124	116340338	exonic	NM_000245	MET	AATCATGAGCACTGCTTTAATAGGATAAACCTCTCATAATGAAGGCCCCCGCTGTGCTTG
ASCRP3000837	31	23	22	28	22	147	92	346	287	409	725	542	hsa_circRNA_102818	hsa_circ_0008298	circBase	chr2	+	128922303	128928858	exonic	NM_020120	UGGT1	AATCCAAACTTTCTGACATGCCTTTAAAAAGGGCAAGCGACTTGGTAATGAAGGTGGATG
ASCRP3000838	18	22	22	22	20	53	30.5	47	26	91	150	108	hsa_circRNA_103721	hsa_circ_0070649	circBase	chr4	+	110442272	110442782	exonic	NM_006323	SEC24B	AATCCAGAGAAGATCCTAATCAGAGATCAAGTACAAAGATGTTTTTCTACCTACACCGGA
ASCRP3000839	42	27.5	25	78	70	392	83	147	188	729	1390	815.5	hsa_circRNA_102223	hsa_circ_0002279	circBase	chr17	-	79536041	79539114	exonic	NM_017921	NPLOC4	AATCCATTTCCTATTGAAAACCGGGATGTATTGGGTGAGACACAGGACGTAGACAAGTTT
ASCRP3000840	21	21	19	24	24	30.5	34	45.5	33	62	74	72	hsa_circRNA_102897	hsa_circ_0003747	circBase	chr2	+	203817281	203826149	exonic	NM_024744	CARF	AATCCCAGTATGTTCCATATGATGGAATCCCATTTGTTAATGCAGATGATCGTTGCCAGC
ASCRP3000842	29	24	23	26.5	28	58	32	34	26	88	85	84	hsa_circRNA_023977	hsa_circ_0023977	circBase	chr11	-	88029300	88045722	exonic	NM_001814	CTSC	AATCCTAAGCCCTCAGGAGGTTGTGTCTTGTAGCCAGTATGCTCAAGTATAAAGAAGAGG
ASCRP3000843	39	32.5	32	49	45	128	36	30	28	157	141	131	hsa_circRNA_055957	hsa_circ_0055957	circBase	chr2	-	107459490	107460490	exonic	NM_032528	ST6GAL2	AATCCTCAACTCTTCCTTGGGCGAGGAAATAGGTTCATTCTGCCACCCATCTGCATTAAG
ASCRP3000844	23.5	23	20.5	21	19.5	40	29	30.5	45	109	105.5	105	hsa_circRNA_024834	hsa_circ_0024834	circBase	chr11	+	128638012	128651918	exonic	NM_002017	FLI1	AATCCTCACGATTGAGTGTCAAAGAAGGGAGTCTCCGGTGGACTGCAGCGTTAGCAAATG
ASCRP3000845	56	53	54	68.5	71	155	43	36	43	226	196	162	hsa_circRNA_004528	hsa_circ_0004528	circBase	chr2	+	242195015	242195594	antisense	NM_005336	HDLBP	AATCCTCATTTCTATTCCTGCCCATGGGGATTTGCCTCCTCTAAATCGTGGGCAGTCAAA
ASCRP3000846	26	25	22	33	24.5	70	37.5	37	43	222	319.5	250	hsa_circRNA_105042	hsa_circ_0092135	circBase	chrX	-	153924191	153928334	exonic	NM_080612	GAB3	AATCCTGTTTCCAGAGAAGACGAAGAAAGCTACATCGAAATGCTGATGTAGAAGGCCAAT
ASCRP3000847	26.5	39	35	25	24	63	71	85	86	225	287.5	222	hsa_circRNA_104110	hsa_circ_0008801	circBase	chr6	+	42902212	42903408	exonic	NM_006586	CNPY3	AATCGATTTGCCAAGTGTGTAAATATGTTGCTGTGGAGCTGAAGTCAGCCTTTGAGGAAA
ASCRP3000848	38	36	34	41	46.5	206	42	30	34	288	331	270.5	hsa_circRNA_102741	hsa_circ_0003497	circBase	chr2	-	63660878	63667005	exonic	NM_015910	WDPCP	AATCTACTCCTCCTGGGTTATGCTCAAGGAAGACTAGAGCTCCTTTTTGGTTCAGGTGTG
ASCRP3000849	33	24	21.5	38	40.5	34.5	33	24.5	28	65	59.5	58	hsa_circRNA_092460	hsa_circ_0000888	circBase	chr19	+	9448471	9449995	exonic	NM_032497	ZNF559	AATCTAGTTGCAGTAGAGAGATGGCTAATGAATGGCGCTTGATGACAGATGAGTAATGCC
ASCRP3000850	24	23	20	22	26	36	27	28	32	79.5	75.5	83	hsa_circRNA_083327	hsa_circ_0083327	circBase	chr8	-	10683661	10692285	exonic	NM_017884	PINX1	AATCTCCAAAAACCGTGTTCACTATATGAAATTCACAAAAGGTCGGCGGAAGCAGAAGTG
ASCRP3000851	27	22	18	24	27	30	32.5	30.5	26	56.5	60	51	hsa_circRNA_405822		25070500	chr19	+	58772216	58775042	intronic	ENST00000595981	ZNF544	AATCTCTGGCAGTAAAATCCAGGAGTCTGCAGTTTCTAAAATCACACAGACTGGAAAGCT
ASCRP3000852	30	31	29	24	24	70	35.5	28.5	29	103.5	82	64	hsa_circRNA_054654	hsa_circ_0054654	circBase	chr2	-	56097854	56151298	exonic	NM_001039348	EFEMP1	AATCTGGAAATGAAAATGGAGAGTTCTACCTACGACTAGAACCCTCTGGTCTCTGAGGGA
ASCRP3000853	56	34.5	40	59.5	66	96	38	35	33.5	233	273	245	hsa_circRNA_007623	hsa_circ_0007623	circBase	chr19	-	52543740	52550313	exonic	NM_014650	ZNF432	AATCTGTCCAGTCCACAGGTCCTGGCTACCCTGGGAAGAGACAAGAAGTAAATGAAGAAA
ASCRP3000854	17	19	18	21	20	40	25	31	23	77	83	67.5	hsa_circRNA_404229		25242744	chr9	+	108467877	108510471	exonic	NM_018112	TMEM38B	AATCTTATGTTCCTTTATACCATCTTTATTGTGGCCACAAAGGAGCAGCTGCATTGGCAT
ASCRP3000856	215.5	260	169	289	207	1250	293	253	126	1097	1015.5	610	hsa_circRNA_010015	hsa_circ_0010015	circBase	chr1	-	12627938	12632881	exonic	NM_004753	DHRS3	AATGAAAAATAAAGAGAGATGGCTTTTGTGAGTTTCCCAACCTCTTTCCCCCACTGAAGC
ASCRP3000857	32	29	23	25	26	113.5	50	110	93	200	269	168	hsa_circRNA_103522	hsa_circ_0068135	circBase	chr3	+	180685838	180688146	exonic	NM_005087	FXR1	AATGAAAATGGGCTAGGTACAAATTCTGAGCTGTCTAACCCCTCTGAAACGGAATCTGAG
ASCRP3000859	36	30	28	37	32	47	75	119	89	88	144.5	110	hsa_circRNA_103469	hsa_circ_0004271	circBase	chr3	+	128984391	128985942	exonic	NM_016128	COPG1	AATGAAGAGATGTTACCCAGTATCTTGGTGTTGCTGAAGAGGGTGGCTTTGAGTATAAGC
ASCRP3000860	29.5	23.5	21	29	26.5	72	35	38	30	101.5	137	97.5	hsa_circRNA_006899	hsa_circ_0006899	circBase	chr15	+	85180577	85184493	sense overlapping	NR_003654	SCAND2P	AATGAAGATCTCCCGGACTTCAAGGAGATTCAGAAAACGTCCAGTGCAGCCCTGCCTGAT
ASCRP3000863	18	23	21	29	27	39	35	111.5	50	88	103	75	hsa_circRNA_100339	hsa_circ_0000131	circBase	chr1	+	151611363	151641111	exonic	NM_030918	SNX27	AATGACAATGACCTTGCTGTTACCTACTTCTTTCATCAGGAACCACGTGAATGTTGAGGG
ASCRP3000865	20.5	22	19	21	19.5	123	63	154	88	296	617	295	hsa_circRNA_102607	hsa_circ_0005315	circBase	chr2	-	8910799	8917022	exonic	NM_020738	KIDINS220	AATGACATTAAAAACCATCTACGAAAGGACACTTACCGAAGAAGGCAGATGCAGAGGACC
ASCRP3000866	27	28	24	26	27	69	37	31	23.5	95.5	108	93.5	hsa_circRNA_104601	hsa_circ_0084125	circBase	chr8	-	42294506	42295095	exonic	NM_006749	SLC20A2	AATGACGTGAGGAAGAGCACTGTCCATGACCCATGGCTCTGTGAAATCGCCCATCTCCAA
ASCRP3000867	95	159.5	140	98	80	851	150	135	111	979	723	473	hsa_circRNA_001795	hsa_circ_0001795	circBase	chr8	-	42294506	42323435	exonic	NM_006749	SLC20A2	AATGACGTGAGGTTCCGCTGTGTGGCAGCTGATTGCTTCCTTCCTGAGGCTTCCAATCTC
ASCRP3000868	42	31	27	49	46	43	50	56	49	87	103	80	hsa_circRNA_103738	hsa_circ_0006563	circBase	chr4	+	129752887	129773423	exonic	NM_024900	JADE1	AATGAGATGGTGTTCTGTGACAAATGCAACATCTGTGTGCACCAGGCTGCCTGCTGTTTC
ASCRP3000869	41.5	42	37	29	25	52	87.5	88	111.5	84.5	110	93	hsa_circRNA_102479	hsa_circ_0004071	circBase	chr19	+	17308600	17311638	exonic	NM_004145	MYO9B	AATGAGCTCAAGTACCTGGACGAGTTCCTGCTCAACAAGGGAGAGGCGCACCTCCTTCTC
ASCRP3000870	226	274	248.5	343	302	1417	271.5	331	207	1804.5	2043	1396	hsa_circRNA_047713	hsa_circ_0047713	circBase	chr18	+	48584494	48586286	exonic	NM_005359	SMAD4	AATGAGCTTGCATTCCAGCCTCCCATTTCCAATCATCCTGGTCAGCCTGCCAGTATACTG
ASCRP3000873	34	31	28	41	38	276	97.5	253	170	550.5	740	523.5	hsa_circRNA_102512	hsa_circ_0050463	circBase	chr19	+	34706028	34706566	exonic	NM_015578	LSM14A	AATGATAACAAGAGACAAGTAGGTCGCTCAAGCCCTCAGTTAGACCCTTTGAGAAAAAGC
ASCRP3000874	20	19.5	18	19	19	40.5	28	21	19.5	79.5	82.5	71	hsa_circRNA_001509	hsa_circ_0001259	circBase	chr22	+	51024958	51033691	exonic	TCONS_00029632	XLOC_014288	AATGATCCAGAAGAGAAGGACAAGTTGACGATTGAGAGGGTTAATGTCAGAGGAGTTGGT
ASCRP3000875	27	20	18	22.5	25	93	29	48	36	128.5	268.5	182.5	hsa_circRNA_104613	hsa_circ_0084171	circBase	chr8	+	42914234	42932507	exonic	NM_002027	FNTA	AATGATCGTGCTGTATTGGAGAGAGAAGTCCAGGACAGAGCAGAATGGGCTGATATAGAT
ASCRP3000877	40	36	20	23	23	46	51	245.5	102	108	91	74.5	hsa_circRNA_103525	hsa_circ_0001367	circBase	chr3	+	183361267	183369064	exonic	NM_017644	KLHL24	AATGATGTCCCCAAGGACTAGGCCACGCAGGTGTGGAAATTAAAAGAACACACATATTTT
ASCRP3000878	48	43.5	56	82	73	265	69.5	94	51	392	427.5	385	hsa_circRNA_104205	hsa_circ_0007769	circBase	chr6	+	144086397	144086935	exonic	NM_014721	PHACTR2	AATGCAAAATGCTGGCTCCTCTCATTCAAAAAAAACAACTGGCTCTAAAGCATCAGCTTC
ASCRP3000880	43	33	29	40	30	4007	109	324	317	7083	11756	7036	hsa_circRNA_005704	hsa_circ_0005704	circBase	chr20	+	10536878	10541468	exonic	NM_001009608	SLX4IP	AATGCAGAATTCACAAGATCCAATCCCTTGTCCTTAAAAGTGTGGGAATTTTGCTGTCCT
ASCRP3000881	26	24	18	21	24	32	27	20	29	65	67	58	hsa_circRNA_406761		25070500	chr6	-	35565024	35614627	sense overlapping	NM_004117	FKBP5	AATGCAGCGGGAAGAACAATGTATTTTATATCTTGGACCAAGGTGTTTGCTGACTAGCAC
ASCRP3000882	34	27.5	21	32	34	194	97.5	385	315	704	1486	921	hsa_circRNA_407027		25070500	chr7	-	151167656	151195266	exonic	ENST00000478470	RHEB	AATGCAGCTTTTTTGGAATCTTCTGCTAAAGAAAATCAGGTTCCTCAAGCCAGGACCTAC
ASCRP3000883	23	21	21	20.5	18	247.5	62	82	95	546.5	832	581	hsa_circRNA_100929	hsa_circ_0007455	circBase	chr11	+	85961337	85967554	exonic	NM_003797	EED	AATGCAGTGTATAAAGGATGACGCTGTCAGTATAGAAAGTGGTACAAACACTGAACGCCC
ASCRP3000885	77.5	56	56	156	116	139.5	88	77.5	85.5	205	183	163	hsa_circRNA_104391	hsa_circ_0080451	circBase	chr7	+	72398922	72400649	exonic	NM_172020	POM121	AATGCCATTACCAGTTCCTACAGCTCCACTCGAGGCATCTCACAGGCGCCATGATAGCAG
ASCRP3000886	51	39	39	50	49	60	60	115.5	77.5	100	106	87.5	hsa_circRNA_404980		25070500	chr12	-	26780965	26808785	exonic	NM_002223	ITPR2	AATGCGGAGACATCTGCCAGTGGATCTCCAGACACTTTACTACCATCAGATATGATTCTA
ASCRP3000887	21.5	25	21	34	19	674	169.5	478	336.5	4196	9190.5	6233	hsa_circRNA_101102	hsa_circ_0000419	circBase	chr12	+	70193988	70195501	exonic	NM_022456	RAB3IP	AATGCGGAGGACCAAAGCTGACTTATCCTTGTATAATGAATTCCGATTGTGGAAGGATGA
ASCRP3000888	296	181.5	219.5	822	925.5	2734	234	254.5	181	2031	1975	1615.5	hsa_circRNA_103054	hsa_circ_0060205	circBase	chr20	-	35312815	35317187	exonic	NM_022477	NDRG3	AATGCTGCCTCCTGTTCTTACCCACCTAAGGAACATGATATAGAAACAACTCATGGTGTG
ASCRP3000889	46	39	30	41	40	78	43	57.5	59	174.5	185.5	146	hsa_circRNA_403286		25242744	chr5	+	904262	908576	exonic	NM_004237	TRIP13	AATGCTGTCTTGACCCAAATTGATCAGATTAAAAGGTCCTCCTGGCACTGGAAAAACATC
ASCRP3000891	130	142.5	117	153	156	572	106	81.5	88.5	642	607.5	466	hsa_circRNA_406961		25070500	chr7	+	77201159	77202117	intronic	uc010ldr.1	PTPN12	AATGCTTAAAAGTGTACCCACCACTGCGCCCTGTCTGTATTCTTAAATAGCACAGTTTTC
ASCRP3000892	24	24	25	40	39	78	39	82	53	121.5	150.5	120.5	hsa_circRNA_003615	hsa_circ_0003615	circBase	chr11	-	77823695	77832220	exonic	NM_024079	ALG8	AATGCTTTGGACAAAGTGCTGTCTGTCATCGGTGCTGTAAATGCATTGATGGAAAAAAAG
ASCRP3000893	62	75	54	59	55	75.5	85	84	81	199	181	157	hsa_circRNA_077760	hsa_circ_0077760	circBase	chr6	-	122779664	122779826	exonic	NM_020755	SERINC1	AATGGAAGAACAACTGAATAAGATACCATGTTTGTGTGGAAGTGCCCCGTGTTTGCTATG
ASCRP3000894	24	21.5	18	26	22.5	37	29	49	44	65	62	59.5	hsa_circRNA_003661	hsa_circ_0003661	circBase	chr11	+	82917099	82922472	exonic	NM_182603	ANKRD42	AATGGGGTTGTAGCATAGAAGATGTGGACTACAATGGAAACCTTCCAGTGTCTTCATTGG
ASCRP3000895	22	27	31	23	21	35	59	171	74	80.5	70	62	hsa_circRNA_003234	hsa_circ_0003234	circBase	chr11	-	13435076	13466728	exonic	NM_032320	BTBD10	AATGTAGAGATCTCAGTTATGGGTGCTACATGTGTGCTTTCAGAGCAGTAGTGTGAGGAA
ASCRP3000896	27	20	22	26	32	41	30	30	28	68.5	75.5	65	hsa_circRNA_001480	hsa_circ_0001480	circBase	chr5	+	43615949	43645612	exonic	NM_012343	NNT	AATGTCAACGGCTTCTGCATATACAGCAGGTGCGAGCCCCTATGGTTAATCCAACATTAG
ASCRP3000899	38	33	40	53	45	171	52.5	287.5	164	293	352.5	299	hsa_circRNA_006499	hsa_circ_0006499	circBase	chr5	-	102432244	102433485	exonic	NM_017676	GIN1	AATGTCCCACCTTAAGCCCTACATAAGAGAATCCAGTGAACAAGATCAATATTGAACTGT
ASCRP3000900	48	34	35	69	57.5	146	43	33	34	206.5	179	187.5	hsa_circRNA_016598	hsa_circ_0016598	circBase	chr1	+	224918163	224918276	exonic	NM_152495	CNIH3	AATGTCCCTCTACTTTTCTATCACTTCTGGAGCTGGTGCTGCCAGAATACTCCATCCATA
ASCRP3000901	34	29	26	35	37	39	58	197	77	85	94	78	hsa_circRNA_102036	hsa_circ_0043026	circBase	chr17	+	30689932	30696801	exonic	uc002hhl.1	ZNF207	AATGTCGCAAGGTGGCCGTTACTGATCTTACTTCATCCAGTCTAATAGAATGATGCCAAT
ASCRP3000902	22	20	21	24	27	44	26	30	23	58	57	59	hsa_circRNA_102903	hsa_circ_0058010	circBase	chr2	-	210962809	211019335	exonic	NM_152519	KANSL1L	AATGTCTGGCTAATGGCATTTACAGGAGGTTTCCAATACTTATCTACAGGAATCGCCATG
ASCRP3000903	30	28.5	26	30	30.5	46.5	29.5	28	29	67	61	63	hsa_circRNA_400678		25242744	chr10	+	127683985	127697119	exonic	NM_145235	FANK1	AATGTGAATGTGAAGGACAGAAATGGAAAGACGCCCCTTATGGAGAGCCCATAAGTAGTG
ASCRP3000904	23	23	18	22	22	39	26	20	19	68.5	65	65.5	hsa_circRNA_055708	hsa_circ_0055708	circBase	chr2	-	97541618	97586999	exonic	NM_001122646	FAM178B	AATGTGAGGTTTCTTTGTGCACATTAAAGTCTTCTTTCAGCATCACTCCAGGAACTGTGC
ASCRP3000905	32	23	22	31	25.5	39	75	42	90	83	84	81	hsa_circRNA_065768	hsa_circ_0065768	circBase	chr3	+	50000008	50114685	exonic	NM_005777	RBM6	AATGTGATTAGTACTGCTATAACCAGAATTTGGTAGAAAAAGGATTTACTTGTTGGGGCC
ASCRP3000906	19	18	16.5	20	20	44	32	67	49	80.5	135	103.5	hsa_circRNA_054469	hsa_circ_0054469	circBase	chr2	+	47635539	47657080	exonic	NM_000251	MSH2	AATGTTATACAGGCTCTGGAAAAACATGAAGGAGCAAAGAATCTGCAGAGTGTTGTGCTT
ASCRP3000907	56.5	100	67	55	48	236	101.5	84	111	381	423	359	hsa_circRNA_406821		25070500	chr6	+	109175427	109197553	exonic	NM_032131	ARMC2	AATGTTCAAAGGAACAACATCTTTACCATCTCATCTCAAGAATGGAGGGGTGTGGTGTCT
ASCRP3000908	47	42	45	67	62.5	237	50	66	47	260	351.5	263	hsa_circRNA_000917	hsa_circ_0000917	circBase	chr19	+	19603114	19607028	exonic	NM_017660	GATAD2A	AATGTTCCCAACACCAGCCTGCTCGTCAACATCCCACAGTGACATGAAGTCCGAGAGGAG
ASCRP3000909	23.5	43	47	26	24	43	44	55.5	31	66	66	63.5	hsa_circRNA_406750		25070500	chr6	-	30695948	30697798	intronic	ENST00000376389	FLOT1	AATGTTCCCAAGTGTGAGGTCTCAGGTTGGAGCTGAGGAGAATTGCTAGGTTCCTGTGTT
ASCRP3000910	35	29	29	39	34	182	88	352	100	369	567.5	371	hsa_circRNA_102783	hsa_circ_0007532	circBase	chr2	+	97024782	97026448	exonic	NM_015341	NCAPH	AATGTTGACACTCTGGTCCAGCTTCACCTCAAACCAGGCACCAGGGGAAGAAATGATTTC
ASCRP3000911	70	37.5	36	105	97.5	40.5	43.5	29	46	72	60.5	60	hsa_circRNA_004097	hsa_circ_0004097	circBase	chr10	-	46753787	47232156	sense overlapping	NM_031912	SYT15	AATGTTTAGGGGTAAGTCTGCTTTTTTTCTATTTTTAATAAAAAGATATATTACAGAAGA
ASCRP3000912	30	26	23	37	29	149	124	811	566	518	963	650	hsa_circRNA_100190	hsa_circ_0006848	circBase	chr1	-	42730785	42744343	exonic	NM_014947	FOXJ3	AATGTTTCCTTAAAGTGCCTCGATCTAAGGATGACCCTGGAAAGGATGACATCTGAACTG
ASCRP3000913	39	28	26	38	38	54	31.5	24	28	91	75	90.5	hsa_circRNA_091053	hsa_circ_0091053	circBase	chrX	-	71492452	71496084	exonic	NM_001007	RPS4X	AATTAAAAATATTGTGGCAGGATTAATAGCAGCTCGTGGTCCCAAGAAGCATCTGAAGCG
ASCRP3000914	32	31	25	25	24	70	35	24.5	27	77	81	80	hsa_circRNA_091412	hsa_circ_0091412	circBase	chrX	-	118750908	118754014	exonic	NM_145799	SEPT6	AATTAAAACAAGAAGCTTTAATTTGGGCTTCCTGTAGACACCCTTTTCCTGCGCAACAGA
ASCRP3000915	84	87	56	93	77	507	77.5	47	55	411	345.5	314	hsa_circRNA_406457		25070500	chr4	-	25193245	25198922	antisense	NR_037934	SEPSECS-AS1	AATTAAAGAGAGTGTTTTAGGGCACTGAACTTCATCTCCTCATTCCTACCCTCCTGGTCT
ASCRP3000916	26	25	23	32	34	42	32	24	28	88	77	71	hsa_circRNA_058992	hsa_circ_0058992	circBase	chr2	+	242092890	242122439	exonic	uc002wat.1	PPP1R7	AATTAAATCTTGCCACACTGTCTTGACAGGCGGGTCGAGTCTGAAGAATCCGGCGATGAA
ASCRP3000918	20	22	19	20.5	20	35	30	21	21.5	99	98.5	93	hsa_circRNA_405354		25070500	chr15	+	56665638	56704634	exonic	NM_198524	TEX9	AATTAAGGCAAAATAACAAGGCGTTTAAATGCAGAATTGCAGGCAAAAACAGCTGACGTG
ASCRP3000920	28	25	24	29.5	45	43.5	42	54.5	51	109	110.5	86	hsa_circRNA_401099		25242744	chr12	-	123818599	123834988	exonic	NM_018183	SBNO1	AATTACATATGCAGCCCAGATGGTGGAGCCAGGGCAAGATTTACTGCTTGCTGCTTTGAG
ASCRP3000921	38	21	20	40.5	38	33	28.5	18	22	65	51	63	hsa_circRNA_004564	hsa_circ_0004564	circBase	chr2	-	204354306	204356042	exonic	NM_203365	RAPH1	AATTACTGAGAGTTTGGATTCTGACAAGCCCATGGAACCAGTAAAAAGATCTCCTCTTCG
ASCRP3000922	84	77	65	65	70	1783	88	125	75	1838	1600	1543	hsa_circRNA_101760	hsa_circ_0038610	circBase	chr16	-	23543977	23563625	exonic	NR_003501	EARS2	AATTCAACAGGCTTCTTGCACCTGGGTGGCCTCCGCACTGCCTTGTACAACTACATCTTT
ASCRP3000924	27	30	25	39	43	118	39	24	25	108	197	130	hsa_circRNA_404761		25070500	chr10	+	69881194	69882097	exonic	NM_032578	MYPN	AATTCCACCACCTCAAGTAAGCATGCAAGACGACAGCATAGAAGCTTCTACTTCCATATC
ASCRP3000925	39	25.5	20	33	32	296	51	102.5	110	381	677.5	467	hsa_circRNA_102973	hsa_circ_0059074	circBase	chr2	+	242346951	242352836	exonic	NM_014808	FARP2	AATTCCATCAGAAGCACGTGGCCAAAGAATGTGGTGCTTCGCCTAGCTGTAAAATTTTTT
ASCRP3000926	26	26.5	27	28.5	28	60	35.5	25	31	90	94.5	93	hsa_circRNA_023948	hsa_circ_0023948	circBase	chr11	+	85961337	85968638	exonic	NM_003797	EED	AATTCCATCCAAGAGATCCAAATCTTCTCCTGTCAGTAAGTAAAGGATGACGCTGTCAGT
ASCRP3000927	103	60	54	88.5	40	135.5	1069	6197	1277.5	513	1308.5	605.5	hsa_circRNA_013729	hsa_circ_0013729	circBase	chr1	+	117910084	117957453	exonic	NM_006699	MAN1A2	AATTCCTAGATGGGCAAAGATGGATTGAAGACAACCTTGATTTCAGTGTGGCAACAGCGG
ASCRP3000929	32	29	23	30	29	162	91	289	198.5	230	309	231.5	hsa_circRNA_101254	hsa_circ_0030051	circBase	chr13	-	41515056	41518061	exonic	NM_172373	ELF1	AATTCTTCCGTTCAGAGTATTAGGAAGAAAAACTAAACCACCACGACCAGATTCCCCAGC
ASCRP3000930	19	23	21.5	28	30	30.5	33.5	25	22	57	58.5	53	hsa_circRNA_015816	hsa_circ_0015816	circBase	chr1	+	200080329	200090083	exonic	NM_003822	NR5A2	AATTCTTGGTGCTCTTTAGTTTAGGTTGATGACCAAATGAAGCTGCTTCAGAACTGCTGG
ASCRP3000931	19.5	23	20	20	19	28	40.5	39	37	63.5	67	61	hsa_circRNA_407259		25070500	chrX	+	1404670	1409402	exonic	NM_006140	CSF2RA	AATTCTTTGATTCACTTTTGGACACAAAGAAAATAGATCTGCGAACAGTGGCACCAGCCT
ASCRP3000932	28	24	21	22	25	145	59	90	77	344	393	364.5	hsa_circRNA_004950	hsa_circ_0004950	circBase	chr3	+	196533449	196539722	exonic	NM_002577	PAK2	AATTGAAAAATCCCAACATCGTTAACTTTTTGGACAGCTGAATGCCAAGGGAACAGAAGC
ASCRP3000933	26	26.5	23	21	23.5	80.5	46	87.5	61	137	238	159.5	hsa_circRNA_004752	hsa_circ_0004752	circBase	chr1	+	43239233	43241150	sense overlapping	NM_024097	C1orf50	AATTGAAGACATGCTGATGAATTCATCCGAGCAAATGCCACCAACAAGCTGACAGTCATA
ASCRP3000934	24	25	21	23	22	36	47	35	33	70	92	70	hsa_circRNA_001913	hsa_circ_0001913	circBase	chrX	-	19701940	19713859	exonic	NM_031892	SH3KBP1	AATTGAAGTAGAAAATGACTTTCTGCCGGTAGAAAAGGTAGAGGAAGGATGGTGGGAAGG
ASCRP3000935	31	24	21	26	25	53	26	56.5	37	64	98	77	hsa_circRNA_405819		25070500	chr19	+	58290118	58291514	intronic	uc002qqb.2	ZNF587	AATTGAATGTCATACATCAAATAGCTGCATACATTCCAGGTTGTTGGCATGGAGGGGAAG
ASCRP3000936	27	27	26	28.5	27	55	58	490	92	86	119.5	91	hsa_circRNA_103116	hsa_circ_0001181	circBase	chr21	+	30693541	30702014	exonic	NM_001186	BACH1	AATTGAGAAGCTGGTTGATGATAATTAGAAGCATGCTTTCCACTGAACTTCCCGACAACA
ASCRP3000937	34	25	25	41.5	34	59	39	125	81	127	119.5	110	hsa_circRNA_407020		25070500	chr7	-	140449086	140494267	exonic	NM_004333	BRAF	AATTGATGACTGGACAGTTACCTTATTCAAACATCAACAACAGGGACCAGGCCCCAAATT
ASCRP3000938	33.5	25	19	35.5	40	92	50	87	62	203	354	263	hsa_circRNA_101868	hsa_circ_0003568	circBase	chr16	+	71954641	71955356	exonic	NM_014761	IST1	AATTGCAAAGAATTACAACGTACCCTATGAACCTGACTCTGTGGTCATGGTTGCTGATCA
ASCRP3000939	27	31.5	36	30	29	65	41	196.5	88	146	236	167.5	hsa_circRNA_013128	hsa_circ_0013128	circBase	chr1	+	91973410	91973954	exonic	NM_003503	CDC7	AATTGCAGCTGAACTTCAGTGCCTAACAGTGGCTGGGTGTTAAAAAAGATATTGAGAAGC
ASCRP3000940	20.5	27.5	24	22	21.5	31	31	60	43	68	58	52	hsa_circRNA_404790		25070500	chr10	+	93579026	93602148	exonic	NM_025235	TNKS2	AATTGCCGCGATACCCAAGGCAGACATTCAACACCTTTACATTTAGCAGGTGAATATAAG
ASCRP3000941	33	29	30	44	41	96	35	23	25	149	104	108	hsa_circRNA_051241	hsa_circ_0051241	circBase	chr19	+	42363987	42375484	exonic	NM_001022	RPS19	AATTGCCTCATTCGTAAGTACTTTCGCCATCATAGTATTCTCCACCACTGTTCCTTCCAG
ASCRP3000942	18.5	23	19	28.5	28	49.5	34	32.5	36	140.5	204.5	133	hsa_circRNA_104749	hsa_circ_0086564	circBase	chr9	+	20907148	20933102	exonic	NM_017794	FOCAD	AATTGCTGCTTTGACACTAGTCTTGAATACAAGTTCATATCCAGCTTTCAGAGTGGCACC
ASCRP3000943	22	20.5	20	22	21	45	26	19	20	93	87	83	hsa_circRNA_101961	hsa_circ_0041671	circBase	chr17	-	5118219	5126751	exonic	NM_207103	SCIMP	AATTGGCCTTCTCTAGAAGACTCTTGATTCCACTGCAATGAGCTGGTGGAGGAATAATTT
ASCRP3000944	74.5	96	77	50	38.5	385.5	422	1088	328	436.5	1048	647.5	hsa_circRNA_403150		25242744	chr4	-	77977114	77987558	exonic	NM_006835	CCNI	AATTGGGATCTTCACACAGCCACACCATTGGATTTTCTTCATATTGTAGCTACAGCAAGC
ASCRP3000946	24	26	25	23.5	24	39	33	60	36	90.5	91	75	hsa_circRNA_103003	hsa_circ_0059545	circBase	chr20	+	18523662	18531819	exonic	NM_006363	SEC23B	AATTGTCATTTATCTTGGTGAGTTGGGCAGATGTACAGAGTCAGCTCAGGCACATAGAAG
ASCRP3000947	20	22.5	20	21	18	34	28	28	36	78	76.5	68	hsa_circRNA_406012		25070500	chr2	-	197986055	197987516	exonic	NM_153697	ANKRD44	AATTGTTAGTAAACAACGGGGCAGATGTTAACATTCAGGCCACTTGGATGTTGTAGCATT
ASCRP3000948	45	45.5	56	42	43	40	61	52	43.5	72	72.5	70	hsa_circRNA_001646	hsa_circ_0001646	circBase	chr6	+	144843115	144854396	exonic	NM_007124	UTRN	AATTGTTGCAGAAGTGAAGGATAGGCAGCCAAGGCAATCCCTATTCAACAGAGGAAAATG
ASCRP3000949	21	23	21	21	22.5	41	34	45	29	94	108.5	72	hsa_circRNA_008640	hsa_circ_0008640	circBase	chr2	-	62100136	62107529	exonic	NM_006430	CCT4	AATTTAAATGGTTCTGGCAAACTGCTCAAGCTGGTGGAGCTGTCTAAGGCTCAAGATATA
ASCRP3000950	25	22	19	27	26	477	46	79.5	66	1348	2737.5	1835	hsa_circRNA_401230		25242744	chr14	-	35036891	35037219	exonic	NM_021249	SNX6	AATTTAGTGGAACTGGCAGAGTTAGAACTGAAGCATGCAAAGGATCTCCTGTATCGAAGG
ASCRP3000951	27	27	22	29	31.5	44	44	32	37	104	90	83	hsa_circRNA_008629	hsa_circ_0008629	circBase	chr10	+	90653627	90665417	sense overlapping	NM_020799	STAMBPL1	AATTTATAACGCCCAAGGATGTGACCTTCTCTTGGATTTTCCTGATTATTATGAGAGGCA
ASCRP3000952	20	25	21	21	21	39.5	32	38	45	72	86	64	hsa_circRNA_407153		25070500	chr9	+	6493825	6499931	exonic	NM_152896	UHRF2	AATTTCAGATGGACCGAGGTGATGAGTTCACATACACTGGAAGCGGTGGTAAAAATCTTG
ASCRP3000953	27	31	32	29	24	94.5	37	49	47	139.5	96	96	hsa_circRNA_029352	hsa_circ_0029352	circBase	chr12	-	125396193	125396954	exonic	uc001ugu.1	UBC	AATTTCATTGCACTTTCCTTTCAATAAAGTTGTTGCATTCCCGTGGGATGCAGATCTTCG
ASCRP3000955	25	29	23	23	25	36	36	34	31	74.5	79	71.5	hsa_circRNA_402372		25242744	chr2	-	136620176	136622733	exonic	NM_005915	MCM6	AATTTCTCAATTTGGGGGGAAAGAGCTCAGAGATGAGGAACAGACAGCTGAGAGCATTAA
ASCRP3000956	24	26.5	25	26	25	34	33	25.5	27.5	54	56	55	hsa_circRNA_102161	hsa_circ_0045194	circBase	chr17	+	61417461	61432751	exonic	NM_025185	TANC2	AATTTCTCTGTGATCCGAGGTGGTTGCCTATCACTATTGTCAAGCAGATAATGCCTACAC
ASCRP3000957	37	33	33.5	54	44	197	44	41	38.5	436	524	404	hsa_circRNA_100404	hsa_circ_0015379	circBase	chr1	-	176145045	176153828	exonic	NM_022457	RFWD2	AATTTCTTGGCCCCATCTGCTTTGATATGATTGAAGAAGCATACATGACAAAATGTGGCC
ASCRP3000958	34	35	30	28	26.5	66	35	30	32.5	89	97	89	hsa_circRNA_042688	hsa_circ_0042688	circBase	chr17	-	27041298	27043076	exonic	NM_031934	RAB34	AATTTCTTTGTTACGAGCACTTATTTAAGATCTCCAAGGTCATTGTGGTGGGGGACCTGT
ASCRP3000959	22	26	26	28	30.5	37	35	46	26	75	67	57	hsa_circRNA_008564	hsa_circ_0008564	circBase	chr10	-	70246900	70276600	exonic	NM_152707	SLC25A16	AATTTGAAAAGTGCCTGTATTGCTGGATGCTGTGCCAAAACAACAGTTGCTCCATTGGAT
ASCRP3000961	43	53.5	52	32.5	35	104	54.5	83	69.5	140	178	135	hsa_circRNA_038416	hsa_circ_0038416	circBase	chr16	-	21475023	21475314	exonic	NR_027155	SMG1P3	AATTTGACTACAATTGGAAATGCCAAAAACTCACTAATAGGGGTTGTTGCTGTAGCCCGT
ASCRP3000962	40	34	30	46	55	35	43.5	97	31	77	59.5	59	hsa_circRNA_400038	hsa_circ_0092373	circBase	chr17	+	75085353	75085553	intronic	ENST00000392476	SEC14L1	AATTTGCAGTAACAGGTGTGAGCATTCTAGCAGCAGTTTGATGATCGTATGTCAAGCATG
ASCRP3000964	43	24	23	61.5	66	55	96.5	217	174	123	155	125	hsa_circRNA_407269		25070500	chrX	+	15833799	15836765	exonic	NM_005089	ZRSR2	AATTTGGAACCTCACCTGAGGGGCAATGTATATGTTCAGTACCAGTCATGTTCACGTAAA
ASCRP3000965	39	59.5	54	47	39	68	63	101	87	186	253	195	hsa_circRNA_102855	hsa_circ_0057105	circBase	chr2	+	173433468	173460751	exonic	NR_103729	PDK1	AATTTGGAAGCAAAATCACCAGGACAGCCAATACAAGTGGTTTATGTACCATCCCATCTC
ASCRP3000967	23	20	20	29	23	41	35	45.5	31.5	74	85	70	hsa_circRNA_100217	hsa_circ_0008197	circBase	chr1	-	51032748	51061888	exonic	NM_007051	FAF1	AATTTTATAACCTGGGCTTGGGATCTGACAAAGGACTCCAACAGAGCAAGATGTGTCTTG
ASCRP3000968	42	38	32	32	44.5	75	86	222	158	273	479	294	hsa_circRNA_005433	hsa_circ_0005433	circBase	chr4	+	119529812	119549381	exonic	NR_109983	LOC729218	AATTTTCATATAAGTGGATTCCAGAGGGGTGACAGCAAAACCTGGACCTACCATGAAAGA
ASCRP3000969	30.5	23	23	32.5	27	87.5	90.5	369	146	188	429	306.5	hsa_circRNA_102786	hsa_circ_0001053	circBase	chr2	-	100078957	100081447	exonic	NM_016316	REV1	AATTTTTAGTGGAGTTGCCATCTATGTTAATGGATACACAGAAGCTCCACCATGAGGCGA
ASCRP3000970	48	85	76	45	37	68	76.5	165.5	115.5	93	85	80	hsa_circRNA_059550	hsa_circ_0059550	circBase	chr20	+	19867164	19983103	exonic	NM_001242581	RIN2	AATTTTTGAAATATCCTTCTTTCAGTGGTGTTGTTGAAAGGGCTTGGCAGCTCCCAAATG
ASCRP3000971	22	21.5	20	20.5	22	41	36	108	102	148.5	208	177	hsa_circRNA_002850	hsa_circ_0002850	circBase	chr10	-	123661905	123683844	exonic	NM_007041	ATE1	AATTTTTGAGTCTTTACCAGAGAATGCATCACACAAGTTAGAGGCATGTGGGCACATTCC
ASCRP3000973	29	32	22.5	31	33.5	263	38	29	29	182	135	138	hsa_circRNA_011717	hsa_circ_0011717	circBase	chr1	+	38273472	38275126	exonic	NM_198446	C1orf122	ACAAAACACCTTCAGTAGAGCCTTGATTAAAAGGAAACCTGCAGACTCTCTCGGCCACGC
ASCRP3000977	85	46.5	25	99	113.5	51	80	39	70	80	106	89.5	hsa_circRNA_000242	hsa_circ_0000242	circBase	chr10	-	70864370	70864480	antisense	NM_002727	SRGN	ACAAACACATCCACTAGCTCTGCAAACACATTCAAAGGTATTGACAGCACAACTGTGTTT
ASCRP3000979	47.5	30	22	46	45	205	107	101	97	561.5	900.5	699	hsa_circRNA_008025	hsa_circ_0008025	circBase	chr3	+	76483440	76483669	intronic	ENST00000475034	ROBO2	ACAAACCGAGTCCTCAAAGAGTACAAAGATATAATAAGCTTTCCAATTTGTTGGCACCCA
ASCRP3000980	29	18	17.5	27	30	109	44.5	150	116	219.5	491	339	hsa_circRNA_104317	hsa_circ_0079485	circBase	chr7	-	16341045	16348252	exonic	NM_001101417	ISPD	ACAAACGAGATCTCTATGCGGCTGAATCGATTATTAAGGTGTAGTGACTATGACTTGGAA
ASCRP3000981	32.5	29	24	32	29	217.5	85	1029.5	450	459.5	739.5	578.5	hsa_circRNA_100226	hsa_circ_0005567	circBase	chr1	-	51868106	51874004	exonic	NM_001981	EPS15	ACAAACTTGGATTTTTTCCAGTCTGATCCTTTTGTTGGCAATCTCTTCTCTGAAAGCTGA
ASCRP3000982	24	23	22	20.5	22	39.5	44	60	28	75	68	60	hsa_circRNA_404525		25070500	chr1	+	67423741	67428843	exonic	NM_020948	MIER1	ACAAAGAAAATGAAAAAGGAAGGCGACATGCCAATTCATGAACTTCTCAGCCTTTATGGT
ASCRP3000983	20	28	21	21	20	39	38	55	28	83	79	65	hsa_circRNA_406916		25070500	chr7	+	23163395	23166829	intronic	ENST00000479288	KLHL7	ACAAAGAAGAATGGCTGAAATATAGAAAACGTTGTGTGACGTGATCCTCATGGTCCAGGA
ASCRP3000985	23	21	21	22	21	42	49	61	67.5	157	162	134.5	hsa_circRNA_008417	hsa_circ_0008417	circBase	chr5	-	94244955	94259726	exonic	NM_024717	MCTP1	ACAAAGATGCTGGGAAAAGGGATGATTTCATTGGCAGGAACTTTCAGAAAATGAAGTGGT
ASCRP3000986	38	49.5	39	30	26	66	43.5	34	43	102	97	81	hsa_circRNA_058197	hsa_circ_0058197	circBase	chr2	-	217536827	217542954	exonic	NM_000599	IGFBP5	ACAAAGCATTTATTTAATAAAGTTATGCATTCAGTTAGGCCCCTGCCGCAGACACATGGA
ASCRP3000987	25	35	40	30	27	83	62	110.5	67	234	306.5	176.5	hsa_circRNA_008757	hsa_circ_0008757	circBase	chr4	+	76725286	76726456	exonic	NM_003715	USO1	ACAAAGCCAGCTGACTGAAAAGGACTCTATGATTGAAAATATGGATCTCCAACTTGAGGA
ASCRP3000988	28	32	28	31	31	370	98	306	196.5	723	1209	759	hsa_circRNA_092420	hsa_circ_0002178	circBase	chr15	+	64404771	64415745	exonic	NM_003099	SNX1	ACAAAGTTACAACACAGAGTAAACATCAGTCTCCAAAGATAACTACATCCCTTCTTCCCA
ASCRP3000990	38.5	40	36	38.5	31	108.5	48	54	49	142	107	131	hsa_circRNA_103010	hsa_circ_0059660	circBase	chr20	-	25282854	25290211	exonic	NM_015600	ABHD12	ACAAATACATTTACAAGAGCCCTGAGCTGCCACGGATACTGAGGTTGGGGTGACTCAGTG
ASCRP3000992	133	188	150.5	118.5	87	866	222	665	330	999	1129.5	942	hsa_circRNA_407331		25070500	chrX	-	129917520	129943235	intronic	ENST00000370935	ENOX2	ACAAATACTCCTTCAGCTGCACATAAATCAACTCCTCCTCTGTAATGGAACAGCTAGTGC
ASCRP3000994	34	27	24	37	40	122	61	268.5	164	260	423	300	hsa_circRNA_044796	hsa_circ_0044796	circBase	chr17	+	56780556	56798173	exonic	NM_058216	RAD51C	ACAACAAAGATTGATAGAAATCAGGCCTTGCTTGTTCCTGCATTAGAACACCGAAAAGCT
ASCRP3000996	25	23	20	24	24	85.5	74	201	109	213	368	280.5	hsa_circRNA_100274	hsa_circ_0005371	circBase	chr1	-	93070863	93073284	exonic	NM_005665	EVI5	ACAACACATTGCTGAGCTTGAAATCCAGAACCAGATCAATAGTAACCATCTTCGAAGAGC
ASCRP3000997	38	29	20	47	33	776	144.5	631	597	1784	3992	2623	hsa_circRNA_000412	hsa_circ_0000412	circBase	chr12	+	58340777	58347472	exonic	NM_033276	XRCC6BP1	ACAACACCACCAGTGCTGTTAACAAAGATAGACACTTTTCTTGCGAAGACTGTAATGGAA
ASCRP3000998	23	19	20	21	30	44	30	22	23	95	129	111.5	hsa_circRNA_405499		25070500	chr16	-	81124205	81124712	exonic	ENST00000564477	GCSH	ACAACAGAAAATGGCATTGGAACAGTGGGAATCAGCAATTTTGCACAGGTTAAATCATTT
ASCRP3000999	28	21	20.5	28	25	43	28	30	27	93.5	150.5	115.5	hsa_circRNA_404569		25070500	chr1	+	114449617	114450813	exonic	NM_022836	DCLRE1B	ACAACATAACATAAAGATTGGTATCTAAGCAATGGATCCAAGCCCTGGAGGTTGGTGAGA
ASCRP3001000	23.5	22	18	20	18.5	87.5	39	72	39	229.5	435.5	228	hsa_circRNA_104273	hsa_circ_0006107	circBase	chr6	-	170852688	170858201	exonic	NM_002793	PSMB1	ACAACATCATCGGTGGACTTGATGAAGAAGTACTATACTGGCAATTGCTGGAGAAGATTT
ASCRP3001001	69	35	36	77	31	1032	1182	4941	3557	4018	7326	4773	hsa_circRNA_083957	hsa_circ_0083957	circBase	chr8	+	37971709	37974243	exonic	NM_004674	ASH2L	ACAACCAAAAACAGAGCAGTGCTGTGTCTACTAGTGGGAATTTAAATGGATATTATACCA
ASCRP3001003	27	22	20	29.5	27	44	30.5	20	22	73	80	72	hsa_circRNA_406999		25070500	chr7	+	117874484	117899943	sense overlapping	NM_019644	ANKRD7	ACAACCCAAGAACACCTTTGCACCTAGCCTGTGCTAATGGACATACAGATGTTGTACTTT
ASCRP3001004	18	24	19	22	19	46	30	32.5	26	113	140	89	hsa_circRNA_400718		25242744	chr11	-	17118603	17121516	exonic	NM_002645	PIK3C2A	ACAACCCAGATAAACATTATATGATTCCTTCAGGGTTACCAGAACTTACAAGTATTCAAG
ASCRP3001005	22	23	21	21	21	150	42	45	93	970	1243.5	902	hsa_circRNA_047274	hsa_circ_0047274	circBase	chr18	+	21645975	21663045	exonic	NM_153211	TTC39C	ACAACGACTAGAGAATGCCATGATGACATTTGAGGAAGAAAAAATGCAGTTGGCATGTGA
ASCRP3001006	23	22	23	23	21	83	56.5	136	88	211	286	196	hsa_circRNA_403356		25242744	chr5	-	74041502	74046492	exonic	NM_032380	GFM2	ACAACTGAAGCAAGGAATGCCTTAATTGAACAAGTCATGTGGACTTTACCTTGGAGGTTG
ASCRP3001007	31	60	82	74	68	38.5	60	140	52	78	77	64	hsa_circRNA_101403	hsa_circ_0032649	circBase	chr14	-	75513078	75516421	exonic	NM_014381	MLH3	ACAACTGTGGCTGTGGATGTTGTACTTGAGAATGGCAATTATTTCCAGTCAGAGAAGGAA
ASCRP3001010	23	24	20	22	20	89	46	134	48	207.5	415	266	hsa_circRNA_405091		25070500	chr12	-	122995655	122999774	exonic	NM_023012	RSRC2	ACAAGAAATAGCTGCAGAGATAGAAAGAAGAGAATTGAAAAGCCGAGAAGATTTAGCAGA
ASCRP3001011	23	25	24	25	23.5	103.5	92	295	169	200	304	213	hsa_circRNA_102510	hsa_circ_0008030	circBase	chr19	+	34685382	34706566	exonic	NM_015578	LSM14A	ACAAGAGACAAGTAGTTCGATCCTTTGGTACAGAAGACAGACCGACAGATCGTCCAATAC
ASCRP3001012	46	41	37	45.5	37	2243	160	2200	989.5	5108.5	9619	6970	hsa_circRNA_104807	hsa_circ_0001866	circBase	chr9	-	86293355	86297981	exonic	NM_013438	UBQLN1	ACAAGAGCAGGCCTCAGGATCATTCAGCTCAGCAAACAAATACAGCTGGAAGCAATGTTA
ASCRP3001014	30	40	32	23	25	116	65	94	101	133	219	173	hsa_circRNA_005606	hsa_circ_0005606	circBase	chr16	+	1675973	1682366	exonic	NM_020825	CRAMP1L	ACAAGATCACCAAGTACATCGACTTTGATCATGGAGCTGAAGGTGGTGGATCATCGTCTG
ASCRP3001015	31	25	19	40	36	105	37	65	50	386	455	381.5	hsa_circRNA_104167	hsa_circ_0077535	circBase	chr6	-	106727535	106740981	exonic	NM_004849	ATG5	ACAAGCAACTCTGGATGGGATTGCAAAATGGCATTATCCAATTGGTTTGCTATTTGATCT
ASCRP3001017	37	31.5	26	37	31	41	38.5	32.5	35	82.5	62	56	hsa_circRNA_101891	hsa_circ_0005687	circBase	chr16	+	84872027	84872341	exonic	NM_031476	CRISPLD2	ACAAGCTTCGGGGCCAGGTGCAGCCTCAGGCCTCCAACATGGAGTACATGAGCTCAAGCG
ASCRP3001018	98	78.5	57	98.5	55	1239.5	81	58	62.5	1710	1950	1418	hsa_circRNA_407041		25070500	chr8	-	16353301	16372347	sense overlapping	ENST00000518026	MSR1	ACAAGGAAAGAAATCTCTCTGGGCCCTGCTTCTGTTTCTCAAAAGGTTACTTTTGTTGTT
ASCRP3001019	36.5	33	27	32.5	37	83	44	40	31	127	140	124	hsa_circRNA_092389	hsa_circ_0000329	circBase	chr11	+	66281876	66287219	exonic	NM_024649	BBS1	ACAAGGAGCTCCTGGTGCTTGACCCCGAGGCCTTCACCATTTTAGCCAAGCTGGTGGTAG
ASCRP3001020	31	31	20	26	22	239	57	61	86	627.5	1168	860.5	hsa_circRNA_000110	hsa_circ_0000110	circBase	chr1	-	114372213	114377061	exonic	NM_012411	PTPN22	ACAAGGAGTAAGGAGAATTCTCACCAAATGTTCCCAAATCCTTATCCTCAGCTGTGAAGG
ASCRP3001022	23	20	20	23	20	56	30	23	22	81	96	86.5	hsa_circRNA_405570		25070500	chr17	+	35783608	35785431	intronic	ENST00000590005	TADA2A	ACAAGGGAAGAAACAATTTTTGTGGGTGATAATGATGATCCCTCTGATAAGCCACCTTGC
ASCRP3001024	147	48	44	135.5	35.5	2891.5	1424	2795	1603.5	5545	10752	7441.5	hsa_circRNA_057753	hsa_circ_0057753	circBase	chr2	-	202195192	202195556	exonic	NM_139163	ALS2CR12	ACAAGTATTTGAAGAATATGTTTCGTACGTATCAGGGAGCTCAAAGAGGCCCATGAAGCA
ASCRP3001025	171	67	46	167	83	10684.5	1366.5	6335.5	4179.5	18209	45457	30577.5	hsa_circRNA_102034	hsa_circ_0005397	circBase	chr17	+	30500849	30503232	exonic	NM_018307	RHOT1	ACAAGTCGATGGATTCCTCTCATAAATGAAAGAACAGACAAAGACAGCAGGTTCCTCCCC
ASCRP3001026	39.5	28.5	26	59	27	2857	363	1145	1047	6535	9673	4654.5	hsa_circRNA_104072	hsa_circ_0002492	circBase	chr6	-	17665469	17669259	exonic	NM_005124	NUP153	ACAAGTGCAGTCCTCTTGATAGGAGTGGGATAGATATCACAGATTTTCAGGCCAAAAGAG
ASCRP3001027	19	24	22	19	22	35.5	35	41	34	87	79	68	hsa_circRNA_102806	hsa_circ_0008827	circBase	chr2	-	114486977	114493435	exonic	NM_025181	SLC35F5	ACAAGTTGGATATTCCAATGTTCTTTGTGGTTTTTGGCAAATTTGTCATATCAAGAAGCA
ASCRP3001028	17.5	19	19	19	19	32	28	21	26	71	72	66	hsa_circRNA_406488		25070500	chr4	-	76852366	76857388	exonic	NM_014435	NAAA	ACAAGTTTACAGTTTCTGGTGATGAACGAGGTTCTGCACCAGTATTGTGGCTCAAGACTC
ASCRP3001030	22	20	16	19	19	42	30.5	54	24	76	95.5	90	hsa_circRNA_030067	hsa_circ_0030067	circBase	chr13	+	41890981	41910892	exonic	NM_024561	NAA16	ACAATACAGAAAAGAAATGTTATGAACAGAAGCAGTACAAAAATGGCCTCAAGTTTTGCA
ASCRP3001031	23.5	26	20	26	38	40	42	89.5	39	102	132	95	hsa_circRNA_030069	hsa_circ_0030069	circBase	chr13	+	41892941	41910892	exonic	NM_024561	NAA16	ACAATACAGAAAAGAGACTTTGGCTATGAAAGGATTAACACTGAACTGTTTAGGAAAAAA
ASCRP3001032	21	23	21	27	25	788	98	331	204	1744	3979.5	2760.5	hsa_circRNA_100642	hsa_circ_0019058	circBase	chr10	+	89653781	89653866	exonic	NM_000314	PTEN	ACAATATTGATGATGTAGTAAGATATTTATCCAAACATTATTGCTATGGGATTTCCTGCA
ASCRP3001033	28	21	22	28	25.5	66	67.5	174.5	102	206.5	119	174	hsa_circRNA_405138		25070500	chr13	-	43500471	43538275	exonic	NM_033255	EPSTI1	ACAATCCTCAACATGGGTGGAAGCCAGTCAGAAACTGAAGTCAGACAGAAACAACAACTC
ASCRP3001037	29	23	19.5	34.5	40	60	31.5	45	36	106	128	108	hsa_circRNA_103043	hsa_circ_0060134	circBase	chr20	-	34295041	34301018	exonic	NM_004902	RBM39	ACAATGTTTCCAACTCTCTAACATGTTTAACCCTCAAACGTACAGGTTTGCAGATTCCGC
ASCRP3001038	75	105	65.5	334.5	91	579	154	1074.5	70	1068.5	1032	950.5	hsa_circRNA_008584	hsa_circ_0008584	circBase	chr18	+	7754370	7755918	intronic	ENST00000332175	PTPRM	ACACAAAACTTGTTCTCCCTCTAGTGTTCCACTTGCACAGGGGTACTTGAATCTAAAACA
ASCRP3001039	22	23	20	27	26	51	30.5	41.5	41	90.5	133.5	105.5	hsa_circRNA_103317	hsa_circ_0064735	circBase	chr3	-	33441680	33467233	exonic	NM_014517	UBP1	ACACAAGACTGTTCTCTAATTTTTCAGTGATGTCTTGGCATTGCCCATTTTCAAGCAGGA
ASCRP3001040	26	19.5	18	32	29	30	30.5	24	24	63	78	73	hsa_circRNA_024295	hsa_circ_0024295	circBase	chr11	+	111907996	111910121	exonic	NM_001931	DLAT	ACACAAGTAAAAGGTTTTGAAGTACAGGAAGAAGGTTATCTGGCAAAAATCCTGGTCCCT
ASCRP3001041	131	121	137	168	351	1005	120	162	102.5	954	962	864	hsa_circRNA_405016		25070500	chr12	+	64485055	64509673	exonic	NM_020762	SRGAP1	ACACAAGTGAAGATGGCCTCCAAATGTTCCCCCTAAGCCCCAGAAACACAGGAAGTCCAG
ASCRP3001044	23	23.5	23	23.5	23	63	27	22	22	71.5	83	72	hsa_circRNA_406747		25070500	chr6	+	25450125	25472749	exonic	NM_017640	LRRC16A	ACACAATTAACCTTGCTGGCAACCCACTGGAGGATAGAGGAGAATCATGAAAAAAGTCTC
ASCRP3001045	34	32	22	25	25	37	51	27	30	74.5	67	67.5	hsa_circRNA_101363	hsa_circ_0006393	circBase	chr14	+	62187099	62188541	exonic	NM_001530	HIF1A	ACACACAGAAATGGATAAGTTCTGAACGTCGAAAAGAAAAGTCTCGAGATGCAGCCAGAT
ASCRP3001046	190	118	163	429	305	499	210	155	188	884.5	1267	867	hsa_circRNA_045234	hsa_circ_0045234	circBase	chr17	+	61882430	61884014	exonic	NM_007372	DDX42	ACACACAGCCCACTCCAATACAGTGCCAGATTGACTATCCACCATTTGAAAAAAACTTTT
ASCRP3001047	147.5	68	51	178	62.5	41285	697.5	2701	2233.5	41251	66859	51785	hsa_circRNA_405815		25070500	chr19	-	57967026	57967550	sense overlapping	NM_020633	VN1R1	ACACACCATCATGGGATACCTCAGACAATGGCAGCTTTTGGATTGAAATATTTGCTGAAT
ASCRP3001048	28	23.5	23	25	31	35	26	20	22	70	49.5	51	hsa_circRNA_000445	hsa_circ_0000445	circBase	chr12	-	118583263	118583380	antisense	NM_002567	PEBP1	ACACAGATCTCAGGTTTCTATTTTTATTCAACTACAAGCAAACAGCACAATTAATGCAAC
ASCRP3001049	27	26	20	26	23	68	43	85	79	181	346	238	hsa_circRNA_003233	hsa_circ_0003233	circBase	chr2	-	9675962	9683414	exonic	NM_003183	ADAM17	ACACAGATGGGGCCGAATATAACATAGAGAGAAGCTTGATTCTTTGCTCTCAGACTACGA
ASCRP3001051	38	28	27	39	31	464	169	353	403	1780.5	3763.5	2324	hsa_circRNA_102658	hsa_circ_0007385	circBase	chr2	-	32142994	32157204	exonic	NM_015955	MEMO1	ACACAGTATTGAAATGCATTTGCCTTATACAGCTAAAGCCATGGAAAGCCATGCAGGATA
ASCRP3001052	19	19.5	17	20	20	66	27	21.5	23	95.5	257	160.5	hsa_circRNA_001066	hsa_circ_0000627	circBase	chr15	+	72789131	72848248	sense overlapping	NM_005744	ARIH1	ACACAGTTATTGCATATTGGGTACTTCCAGAAGTATGAATTCAGTGATGCAAAGGACAGG
ASCRP3001053	32	31.5	19	18	21	31.5	35	23	39.5	80	77	74	hsa_circRNA_102117	hsa_circ_0000782	circBase	chr17	-	47388673	47390207	exonic	NM_014897	ZNF652	ACACATGAAAACACACACTGTGTGTTTCCTGTAACAAATCGTTCAAGAAACTCTGGTCCC
ASCRP3001054	24	21	21	25.5	23	33	27	21	28	83	181	86	hsa_circRNA_405408		25070500	chr15	-	82218013	82218366	exonic	TCONS_00023758	XLOC_011550	ACACATGAAGAGAAAATGGATGTAATAACCAAGGACTGCCTGATAGGGCCAGAAAGGATG
ASCRP3001056	24877	43945	53355	52646.5	40613.5	39250	75077.5	71160.5	31310	31934	40519.5	32288	hsa_circRNA_101010	hsa_circ_0025395	circBase	chr12	+	9073580	9074346	exonic	NM_004426	PHC1	ACACCACCTCCCCACCCCTCAACCAGTCTCAGGCCCAGATGTATCTACGGGCCACAATTG
ASCRP3001057	37	39	35	40	32	254	86	216.5	163.5	325.5	444	327	hsa_circRNA_100033	hsa_circ_0009581	circBase	chr1	-	8555122	8601377	exonic	NM_012102	RERE	ACACCACTCTGAATGCACTGAACACAAGGGAAGTGTAACATCTCCCATTTTTCTGACATA
ASCRP3001058	24	23	24	30	44	39	36	60	40	69	81	72	hsa_circRNA_100995	hsa_circ_0024913	circBase	chr11	-	134054531	134055421	exonic	NM_015261	NCAPD3	ACACCAGCAGAGGAGCAGCCGATATTTAAATAAGGCTTTTCATATCTGGTCCAAGAAAGA
ASCRP3001059	51.5	34	36	97	53	857	649	3370	2373	3671.5	8013	4745	hsa_circRNA_007444	hsa_circ_0007444	circBase	chr5	+	95091099	95099324	exonic	NM_014899	RHOBTB3	ACACCAGGAAAGAAAAAATGCCTGTCTTAAAGGCTGAAGCGTCACATTATAACTCTGACT
ASCRP3001060	216	480	457	551	328	2619	437	594	172.5	3191	2981	2149	hsa_circRNA_004466	hsa_circ_0004466	circBase	chr12	+	112303053	112308984	exonic	NM_003668	MAPKAPK5	ACACCCCAGTTCACCCCTTATTATGTAGCACCCCAGGAAACTTCCATTTTAGAAGAATAC
ASCRP3001062	247	373.5	412	557	364	2596	295.5	315	175	3216	3011	2559	hsa_circRNA_000025	hsa_circ_0000025	circBase	chr1	-	21295966	21307720	exonic	NM_003760	EIF4G3	ACACCTACTCCTCCTCAGTTTTTCCAGAGGCCTCAAATACAGCCTCCTAGAGCTACCATC
ASCRP3001063	34.5	21	19	47	44	105	40	64	36	157	281.5	212.5	hsa_circRNA_405492		25070500	chr16	-	72651081	72651452	exonic	ENST00000570152	AC004158.2	ACACCTAGATTTCTTCCTGCGTGAATCCAGTTGAGAACCTTTTTGTGATGAAAACGAGAT
ASCRP3001065	135	129	114	478	336	1454.5	261	342	102	3171	2770.5	2220	hsa_circRNA_034804	hsa_circ_0034804	circBase	chr15	+	42579888	42589854	exonic	NM_198141	GANC	ACACCTCTCAGGTTCCTCTCCTGGCTGAAATTTATGGTATAGAAGGAAACATTTTCAGGC
ASCRP3001066	23.5	20	18	19	20.5	35	26	18	26	70	80	76	hsa_circRNA_102047	hsa_circ_0000759	circBase	chr17	-	35640167	35646430	exonic	NM_198838	ACACA	ACACCTGAAGACCTTAAAGCCAATGCAGACTTTGAAATACTCGTGGGATATGAAGTGGAG
ASCRP3001067	26	23	22	25	27	153	52	125	76	584	987.5	726.5	hsa_circRNA_406466		25070500	chr4	-	39843567	39851272	exonic	NM_001100399	PDS5A	ACACCTGTAAAGAATATTGACCCAGTAAAGAATAAGGTGCCTATGGTTCATGCTTGAAGT
ASCRP3001068	24	26	21	26	23	33	42	42	33	63.5	76.5	66.5	hsa_circRNA_104571	hsa_circ_0083694	circBase	chr8	+	25156459	25159970	exonic	NM_024940	DOCK5	ACACCTGTGGACTCCGAAGACCTTTTGGAGTGGCAGTCAATCCTGCAGAACCTCGATTTG
ASCRP3001069	27.5	21	21	33	34.5	39	28	27	24	92	79	60	hsa_circRNA_004187	hsa_circ_0004187	circBase	chr14	-	78023383	78043258	exonic	NM_004863	SPTLC2	ACACGAAGGCCCTGGAAGAAAATTCTCATCCTTGTGGAAGGAATATATAGGTATACAGGG
ASCRP3001071	29	19	20	33	27.5	34	32	29	24	66	71	69	hsa_circRNA_068293	hsa_circ_0068293	circBase	chr3	+	183901269	183901879	exonic	NM_004068	AP2M1	ACACGTGTGACTTCGTCCAGTTACAAACCCAATAAACTCTGTAGAGTGGAGTGCCATTCG
ASCRP3001072	21	25	23	24	22	57	31	29	29	77	75	58	hsa_circRNA_404778		25070500	chr10	+	76315125	76360251	sense overlapping	NM_001123	ADK	ACACTATAATGGCTACAGGTGTCAGATCCAGCTAGCAGTGCCATAAGCCAGAATTATAGA
ASCRP3001073	25	31	33	28	30	30.5	43	39	32.5	61	59.5	55	hsa_circRNA_406697		25070500	chr5	-	150075067	150076453	exonic	NM_018047	RBM22	ACACTATATGTTGGTGGTCTAGGTGATACCATTACTGAGACAGATTTAAGGCCTGCCCAT
ASCRP3001074	42.5	36	37	40	43	42	50	50.5	67	97	90	79	hsa_circRNA_103350	hsa_circ_0065220	circBase	chr3	-	47468936	47470160	exonic	NM_012235	SCAP	ACACTCAAAGTATGTGGGTGCCCCGGTGGCTTATGTCCAGCAGATATTTGTGAAGTCCTC
ASCRP3001075	90	55	62	180	161	232.5	99	96	99	472.5	305	291	hsa_circRNA_008913	hsa_circ_0008913	circBase	chr16	-	75636982	75656362	exonic	NM_012091	ADAT1	ACACTCCCTCAGGTCGATGGCCAGGTGGTCTTCATAAACTATACTGCCTTGTGATGCCTC
ASCRP3001076	19	21	19	27	28	51.5	33	18	21	90	110	97	hsa_circRNA_004070	hsa_circ_0004070	circBase	chr1	-	46751033	46752171	exonic	NM_006369	LRRC41	ACACTCTCCTACAATGAGTGTGACATGTTGGCGAGCCAAGTTTATGGAGGCCTTTTTTTC
ASCRP3001077	30.5	25	22	27	26	61	29	26	27	87	93	85	hsa_circRNA_008805	hsa_circ_0008805	circBase	chr17	+	36614345	36619623	exonic	NM_001199417	ARHGAP23	ACACTCTGGAGCTGTCTATCATGCCCAAGGACGAGGACATCCTCCAGCTGCTGCCACTGG
ASCRP3001078	64	61	57.5	55	67	784	116	345	253.5	719	2136	1420	hsa_circRNA_104493	hsa_circ_0082413	circBase	chr7	+	131113791	131113904	exonic	NM_013255	MKLN1	ACACTGAAAAAGAGAGACTGTTTATTTGTTTGGTGGCTGGGATGGAACACAAGATCTTGC
ASCRP3001079	24.5	20	19	21	24.5	45	58	330	167.5	111.5	159	130	hsa_circRNA_031939	hsa_circ_0031939	circBase	chr14	-	52977957	53011089	exonic	NM_020784	TXNDC16	ACACTGAACATTCACCTGTTTATTAAGACAATGAAAGCACCTCTGTTGATAACATAGATC
ASCRP3001080	32	28	20.5	27.5	23	165	99	295	127.5	629	939	668	hsa_circRNA_067864	hsa_circ_0067864	circBase	chr3	-	167422629	167438061	exonic	NM_007217	PDCD10	ACACTGAGAGCCGCTTTCATCAAGATCAGTGTGTTTTTTGTGTCCAATTCTTTTATCACC
ASCRP3001081	28	26	23	31	29	55	36	40	35	131.5	195.5	150.5	hsa_circRNA_071374	hsa_circ_0071374	circBase	chr4	+	166141085	166160051	exonic	NM_007246	KLHL2	ACACTGCAGAAATTCAGGTTACAGAAGAAAATGTACAGATGCACAAAGCAGGGTCATCAG
ASCRP3001082	36	23	20	36	46	33	48	58	80	64	83	71	hsa_circRNA_102109	hsa_circ_0003650	circBase	chr17	+	45740454	45752148	exonic	NM_002265	KPNB1	ACACTGGTGGAAGGTACGAGTGGCTGCTTTACAGAATCTGGTGAAGATAATGTCCTTATA
ASCRP3001083	28	21	21	43	46	41.5	32	28	25	69	89	72	hsa_circRNA_000804	hsa_circ_0000804	circBase	chr17	-	73946854	73952028	exonic	NM_004035	ACOX1	ACACTGTCATGATGCTCCAGACGGCTAGTTGGAAAGACTTCAAATCATGCAATAGTTCTT
ASCRP3001086	19	18	18	20	20	69	36	62	78	230	485	336	hsa_circRNA_006409	hsa_circ_0006409	circBase	chr10	+	102697158	102703885	exonic	NM_018121	FAM178A	ACACTTCCTGAAACCAACATTTTAAATGTGGTTAAGATGATGTCAGTTCATACAGACTGT
ASCRP3001088	33.5	26.5	26	55	47	282.5	116.5	1611.5	575	689	1549	983	hsa_circRNA_405165		25070500	chr13	-	95768175	95822882	exonic	NM_005845	ABCC4	ACACTTGGATGATTTGCTGCCGCTGACGTTTTTAGATTTCATCCAGGTGTATTTGTCAAA
ASCRP3001091	20	22	21	19	19	57.5	27	22	22	96	109	80.5	hsa_circRNA_407252		25070500	chr9	-	136273891	136278041	exonic	NM_020385	REXO4	ACAGAAATATAAACCTTTCAAGAGTCAAGTAAAGGGAAGACATCTGGTTTGACGACGTGG
ASCRP3001092	26	26	22	26	26	41	31.5	22	28	78.5	56	52	hsa_circRNA_404233		25242744	chr9	-	111637174	111644467	exonic	NM_003640	IKBKAP	ACAGAAGACTTCGGTTCCTGTTCTTGGATTATGAAGAAGCTGTGCTCTTGCTGTTAGAAG
ASCRP3001093	45	33	28	69	35	5625	272.5	785.5	849	8204.5	18203	11209	hsa_circRNA_403961		25242744	chr7	-	148516069	148516779	exonic	uc011kuj.2	EZH2	ACAGAAGATTCATTGAATGGCACCTGCAGAAGCTTTTCATGCAACACCCAACACTTATAA
ASCRP3001094	21	21.5	20	24	19.5	52	26	34	24	118	121	106	hsa_circRNA_057073	hsa_circ_0057073	circBase	chr2	+	172782046	172844276	exonic	NM_003642	HAT1	ACAGAAGCTACAGACTGGATATTAAAAGAAGACTAATTAGCCCATATAAGGATTTGGTGC
ASCRP3001095	37	33	22	31	35	139	54	104.5	104	348	536	438	hsa_circRNA_101372	hsa_circ_0006278	circBase	chr14	-	68151731	68157138	exonic	NM_016026	RDH11	ACAGAAGGTCTTGAGATTCTAAGTGGGAATCATTTCAGGTCACTTCCTCCTAACCCATCT
ASCRP3001096	19	20.5	19	20	21.5	44	27	33	30	110.5	190	130	hsa_circRNA_102772	hsa_circ_0004964	circBase	chr2	+	85270686	85276771	exonic	NM_020122	KCMF1	ACAGAATTCCCAGTTTCTTTTAACAAGATTTGTCCAATATGTGCAGCGTTACCTGGAGGC
ASCRP3001098	29	27	22	23	22	47	32	27	23	85.5	66	58	hsa_circRNA_405691		25070500	chr18	-	52937061	52946887	exonic	NM_003199	TCF4	ACAGACAGTATAATGGGTCTATGCTCCATCAGCAAGCACTGCCGACTACAATAGGGACTC
ASCRP3001099	22	24.5	21	21	20.5	33	55.5	276	104	73	85	71.5	hsa_circRNA_000175	hsa_circ_0000175	circBase	chr1	-	205585605	205593019	exonic	uc021pid.1	ELK4	ACAGACATTCAACATGATTGCATTTGAACTCATTGCTATGGACAGTGCTATCACCCTGTG
ASCRP3001100	34	28	29	51	35.5	563	187	838	540.5	2577	4381	3222.5	hsa_circRNA_026232	hsa_circ_0026232	circBase	chr12	+	50824277	50829407	exonic	NM_052879	LARP4	ACAGACCCTGATCTAATTCTTGAAGTGTTAAGATGAGAAAGCAATTCAGCAGTTTCTACA
ASCRP3001101	43	46	51	42	40	158	50	44	53	167	276.5	197.5	hsa_circRNA_101387	hsa_circ_0032434	circBase	chr14	+	71479716	71479919	exonic	uc010are.1	PCNX	ACAGACTCACACTTTTGGCCCTGTTTGATAGATTCGATTGAATAGACTATTGACCATTGA
ASCRP3001102	34	42	44	40	34	46	42.5	49	40	76	84	75	hsa_circRNA_405555		25070500	chr17	-	26918715	26926848	intronic	ENST00000481916	RP11-192H23.4	ACAGACTGACACATCTCACAGTGGGGTTTCCCGTGCATAGGAGATCCAAGACAGCAGAAG
ASCRP3001103	19	21	19.5	20	18	39	33	37	36	95	113	89	hsa_circRNA_067100	hsa_circ_0067100	circBase	chr3	-	124997967	125032500	exonic	NM_021964	ZNF148	ACAGAGACATGTCTTCATTCATACAGGCAGTTATACTTAAGCATGAACATTGACGACAAA
ASCRP3001104	52	43	41	72	62	252	64	101	105	409	686	430	hsa_circRNA_104798	hsa_circ_0087300	circBase	chr9	+	82267507	82268990	exonic	NM_007005	TLE4	ACAGAGACTCCATCAAGCAACAACTCCAGGCCCAGCATTTATCACATGGACATGGTCTCC
ASCRP3001105	18	21	19	21	20	152	35	67.5	45	386	820	507.5	hsa_circRNA_101866	hsa_circ_0040370	circBase	chr16	-	71772844	71773244	exonic	NM_001128	AP1G1	ACAGAGCTAGATATGACGGACTTTGTTTTCCAAGCTGCAGTACCAAAGGTGCTCCAGCTG
ASCRP3001106	20.5	21	19.5	20	18	40.5	28	21	22.5	83	74	60	hsa_circRNA_407313		25070500	chrX	+	102730028	102741511	intergenic			ACAGAGCTCATCAGTGTGACATGCATAAAGGAATTTCTTATTGAGCCCCAGGAAGAAGAA
ASCRP3001107	31	28	23	25	26.5	632	60	116	75	824	1335	998	hsa_circRNA_100785	hsa_circ_0008227	circBase	chr11	+	34093272	34093534	exonic	NM_005898	CAPRIN1	ACAGAGGAGTTTCATGGCACTAAGTCAAGATGGTAAGCTTGATGATTACCAGGAACGAAT
ASCRP3001109	42	44	44	50	26	43	56	25	36	95	65.5	55	hsa_circRNA_407173		25070500	chr9	+	35657761	35658017	antisense	NR_003051	RMRP	ACAGAGTCCTCAGTGTGTAGCCTAGGATACAGGCCTTCAGCACGAACCACAATGAGCCCC
ASCRP3001110	27	21	19	34	22	6074	88	219	163	12661	21153	16159	hsa_circRNA_104233	hsa_circ_0078362	circBase	chr6	+	155095122	155099179	exonic	NM_014892	SCAF8	ACAGAGTGTTGAGAAGTTTATTCAGAAATTGTATTCCCTGAATGACTATAAACCACCCAT
ASCRP3001111	22	22	19	21.5	20	37	30	24	21.5	76	67	63	hsa_circRNA_077544	hsa_circ_0077544	circBase	chr6	-	107531642	107533486	exonic	NM_020381	PDSS2	ACAGATCGGAGAGGAAAGTTATATCACAGATGATATTGGAATATCGACTTGGAAGGAGCA
ASCRP3001112	32	29	27	36.5	30	55	47	49	37	123.5	123	95.5	hsa_circRNA_100826	hsa_circ_0022245	circBase	chr11	-	61039146	61042056	exonic	NM_152718	VWCE	ACAGATCTGGTCGCCTGGTGACCCCTGTGAGTTATGCATCTGCCAGTGAGATGCTATTTC
ASCRP3001113	35	23.5	20	30	34	47	29	21	24	75	100	74.5	hsa_circRNA_047820	hsa_circ_0047820	circBase	chr18	+	56601664	56648849	exonic	NM_018181	ZNF532	ACAGATGCCACCAATGAGGAGGAAACAGAAATAAAAGAAGACACTAAGAAGACTTGCACT
ASCRP3001114	26	28	24	36	35	55	35	25	25	83.5	85	72.5	hsa_circRNA_406688		25070500	chr5	+	141765092	141770616	intronic	ENST00000510311	AC005592.2	ACAGATGGAAAAGGCGGCTCTCTGACTAGTGAAAGGGATCACAGTATAAGACAGTGAATA
ASCRP3001115	23	18.5	19	24	21	43	40	91	69	78	132.5	103	hsa_circRNA_001508	hsa_circ_0001508	circBase	chr5	+	80071512	80088663	exonic	NM_002439	MSH3	ACAGATTTATCATTTATGATAGAAATAAAGAACTCTGCTGTATCTTGTATACCAACTGAT
ASCRP3001116	387	146	136.5	290.5	163	103	201	157	167.5	295.5	423.5	272	hsa_circRNA_018225	hsa_circ_0018225	circBase	chr10	+	38726471	38734535	exonic	NR_024497	LINC00999	ACAGCAAAACGAAGTGACCTCACAATGACTCAAGCTACCACATGCTGTTGATTGTGAAAT
ASCRP3001117	29	26	21	30.5	26.5	77	56	102	36	122.5	290.5	213	hsa_circRNA_000603	hsa_circ_0000603	circBase	chr15	+	56680669	56687032	exonic	NM_198524	TEX9	ACAGCAACAGTTGTCTTCAGTAGAAAGGAGGTCTGTTACCATCTGAAGGGATAGTTCATC
ASCRP3001119	22	21	20	22	23	39	29	32	31	77	94	82	hsa_circRNA_404718		25070500	chr10	+	12159671	12160917	exonic	NM_018706	DHTKD1	ACAGCAAGAGATGAGCAAATACAAACATGTTAAAGGCAGCCGTGTCAACTCTTCAAGAAA
ASCRP3001120	23	25	22.5	21	23	43	47.5	135	89	131.5	147	128.5	hsa_circRNA_000234	hsa_circ_0000234	circBase	chr10	-	35349801	35360267	exonic	NM_003591	CUL2	ACAGCAAGGGTGCAGACTATATGGACTGCTTATATAGATTTCAACACTACACTTGCACAA
ASCRP3001121	18	23	18	19.5	21	139	32	41	50	140	305	196	hsa_circRNA_406746		25070500	chr6	+	21108631	21144254	intronic	ENST00000378624	CDKAL1	ACAGCACAATTTTAGTAGAAAAAGCAAAGGACAAAAGATCTTTCTCGGGTGTTTCATTCT
ASCRP3001122	494	256.5	385	607	719	633	429	1980	745.5	2034	3756.5	2254.5	hsa_circRNA_402458		25242744	chr2	+	208589523	208598771	exonic	NM_152523	CCNYL1	ACAGCACAGTCAGCCAGCCTAATCTTAGAACCACAGTAAAATGATTTAGCTTTGGAGTCA
ASCRP3001124	46	30	25	36	34.5	329.5	202	438	305	719.5	1492	1019	hsa_circRNA_404062		25242744	chr8	-	74650518	74652103	exonic	NM_014393	STAU2	ACAGCAGTTTGGTCAATATTGTCTTAACATGCTTCAAATAAATCAGAGGCTGCCTACCAC
ASCRP3001125	24	23	20	25	24	41.5	28	36	25	83.5	111	96	hsa_circRNA_401911		25242744	chr18	+	9117835	9122679	exonic	NM_021074	NDUFV2	ACAGCATACTGGAGGCCATTCAGAAAAAGCTTGGGAAGACATGTAAGGAATTTGCATAAG
ASCRP3001126	37	72	117	46	41	46	57	71	53.5	71	71	65	hsa_circRNA_088200	hsa_circ_0088200	circBase	chr9	-	117819431	117819704	exonic	NM_002160	TNC	ACAGCCACGACAGCCAAAGAACCTGAAATTGGAAACTTAAATGTTTCTGACATAACTCCC
ASCRP3001127	320	206	228	619	654	739	172.5	144	166	930	1041	900	hsa_circRNA_059880	hsa_circ_0059880	circBase	chr20	+	32354656	32358098	exonic	NM_032819	ZNF341	ACAGCCTCCTGCCACAGCACAGCCCCAAGAAGGACAATGCCGTCTACAAGGTTGGGCCAG
ASCRP3001128	91.5	49	49.5	187.5	192	222	92	213.5	114	256	548.5	386	hsa_circRNA_008046	hsa_circ_0008046	circBase	chr14	+	31103152	31112611	exonic	NM_016106	SCFD1	ACAGCCTCTTCTGCTTTTTTGTTACTCTGGGCTTTTACACTCTGATCGAGATCCTATTCC
ASCRP3001129	21	27	23	24	29	39.5	33.5	23	26	71	75	64	hsa_circRNA_406479		25070500	chr4	-	54811039	54817857	antisense	uc003haa.3	PDGFRA	ACAGCGAAAAGACCTACAGCACTCTGCAAAAGGCATTCTTCACCAAAGTGTGTCTCCTTG
ASCRP3001130	260	89	73.5	170	184	64	172	216	277	194	376.5	244.5	hsa_circRNA_020596	hsa_circ_0020596	circBase	chr11	-	133587	139152	exonic	uc001lnx.4	LOC100133161	ACAGCGAAACGAAGTGAGCTCACAATGACTCAAGCTGCCACATACTGTTGATTGTGAAAT
ASCRP3001131	162.5	64	53	111	117	51	131.5	165	213	148	287.5	191.5	hsa_circRNA_003163	hsa_circ_0003163	circBase	chr1	-	222652709	224149975	sense overlapping	NM_003268	TLR5	ACAGCGAAACGAAGTGAGCTCACAATGACTCAAGCTGCCACATAGTGTTGATTGTGAAAT
ASCRP3001132	165.5	57	50.5	108	118	53	122	163	224	154	293	210	hsa_circRNA_092375	hsa_circ_0001978	circBase	chr1	-	224142178	224149975	intronic	TCONS_l2_00001800	XLOC_l2_001331	ACAGCGAAATGAAGTGAGCTCACAATGACTCAAGCTGCCACATAGTGTTGATTGTGAAAT
ASCRP3001133	25	25	24	20	18	37.5	33	50	37	66	92	68	hsa_circRNA_042451	hsa_circ_0042451	circBase	chr17	-	20907514	20910300	exonic	NM_015276	USP22	ACAGCGAAGGCGATTTGAACACTCAGCCAAGCTGCGGCGGAAGATCACCACGTATGTGTC
ASCRP3001135	32	31	29	39	43.5	91	38	69	50	151.5	264	183	hsa_circRNA_101851	hsa_circ_0005733	circBase	chr16	+	69279504	69304188	exonic	NM_006750	SNTB2	ACAGCTACCCACTTGTTGCCACCAGTCAAGTTCATCCGAGAAGTAACACCATATATCAAG
ASCRP3001136	21	23	21.5	22	22.5	466	42	52	41	1411	1967.5	994	hsa_circRNA_100283	hsa_circ_0013222	circBase	chr1	-	94360169	94363454	exonic	NM_002061	GCLM	ACAGCTGTTGACTCACAATGATCCAAAAGCAAAACTGTTCATTGTAGAATCAAACTCTTC
ASCRP3001137	17	20	19	20	25.5	47	26	19	19.5	115.5	169	132.5	hsa_circRNA_077893	hsa_circ_0077893	circBase	chr6	+	134303705	134305809	exonic	NM_004865	TBPL1	ACAGGAAGTATCACAGTAACAGAAAGTATTAATGAAGCTTAGAAAACCTAGAATTACAGC
ASCRP3001138	89	72	59	131	136	118	94	132	122	204	236	192	hsa_circRNA_028319	hsa_circ_0028319	circBase	chr12	-	112370389	112381173	exonic	NM_138341	TMEM116	ACAGGACACCAAGCTTCACATGGCCCTTTATGTTCTCCAGATATTCTACATTTCCTCATT
ASCRP3001140	28	21	16.5	27.5	28	30	32	33	39	58	78	70.5	hsa_circRNA_092490	hsa_circ_0001064	circBase	chr2	+	120830753	120836157	exonic	NM_020909	EPB41L5	ACAGGAGTCCTTGTTTTTGAAGGAGATACCAAAATTGGCTTATTTTTTTGCATTGGTTGG
ASCRP3001141	41	48	52	35	24.5	281	85	393	245	448.5	749.5	368.5	hsa_circRNA_006314	hsa_circ_0006314	circBase	chr15	+	72810407	72837305	exonic	NM_005744	ARIH1	ACAGGATATGCCTTGTCAGATCTGCTACTTGAACTACCCTAACTCGAATCCAGCAACTAT
ASCRP3001142	19	17.5	18	20	20	33	25	21	20	73.5	90.5	79	hsa_circRNA_101277	hsa_circ_0007610	circBase	chr13	+	76301164	76335174	exonic	NM_005358	LMO7	ACAGGATTTATCAAATCGAGTCACTGTCAATTTGATTAATAAGCTTAAACCTGGCGTCAT
ASCRP3001143	51.5	44.5	22	38.5	42	42	65.5	39	53	100	76	60.5	hsa_circRNA_007209	hsa_circ_0007209	circBase	chr8	-	135612678	135622898	exonic	NM_020863	ZFAT	ACAGGCACATCTTAAAGTTCACACAGCACTGGTAACGAGTCTGACCTTGAACTAGAAAAG
ASCRP3001147	32	26	25	32	34.5	63	58	104.5	133	150	180.5	161.5	hsa_circRNA_404886		25070500	chr11	+	48175347	48177671	exonic	NM_002843	PTPRJ	ACAGGGAAGAGATCTGAAGCTTGTTGGAATTAGTCAACCTAAATATGCAGCAGAACTGGC
ASCRP3001151	44	37	37	56.5	39	57	317	3186	564	128	193	164	hsa_circRNA_405317		25070500	chr15	+	40933576	40943017	sense overlapping	NM_144508	CASC5	ACAGGGCATTTATCCACAACAGTGTTTCTCAAGCTTGAATACTACCATAATTTTTAGATT
ASCRP3001152	24	23	20	23	27	39	29.5	27	24	68	68	66.5	hsa_circRNA_104304	hsa_circ_0079363	circBase	chr7	-	6465618	6472590	exonic	NM_139179	DAGLB	ACAGGGCTGCAGTACAGGGACTTCATCCACGTCAGCTTCCATGACAAGGACACAGATCTG
ASCRP3001154	29	31	32	23	27	33	33	33	39	52	56.5	51	hsa_circRNA_407257		25070500	chr9	+	140109659	140109825	intronic	ENST00000344894	NDOR1	ACAGGTGAGGGCAGCCTTGGGCCTGGTGGTTGGAGCCCAGGACCGGCCCTGGGAAAGCTG
ASCRP3001155	23	22	20.5	40	48.5	53.5	34	45	37	119	152.5	138	hsa_circRNA_029998	hsa_circ_0029998	circBase	chr13	-	36822742	36828280	exonic	NM_001144981	CCDC169	ACAGGTGGATCAACTGCCTAGGATGCAAGAGAATCTAGTGAAAACGAATCCTTAAACACA
ASCRP3001157	21	22	21	21	20	44	28	29	22	99	125	94.5	hsa_circRNA_404684		25070500	chr1	+	235498556	235506198	sense overlapping	NR_036605	GGPS1	ACAGTAAATAGATTAGCTTTGAAGTTTAAATCCAATGGAGAAGACTCAAGAAACAGTCCA
ASCRP3001158	18.5	24	19	26	22.5	43	66	261	148.5	205	301	207	hsa_circRNA_104479	hsa_circ_0001741	circBase	chr7	-	128655032	128658211	exonic	NM_012470	TNPO3	ACAGTAGTATCTCTATTGGTTCATGCATGGGAGATCTCAGACCAGTTGTTACAGATCCGG
ASCRP3001159	25	27	24	30	24	90	55	219	107	303.5	618	383	hsa_circRNA_079518	hsa_circ_0079518	circBase	chr7	-	17890448	17937069	exonic	NM_015132	SNX13	ACAGTATCTTAGATCTCTAGATACAGCTGGTGATGGCCAGTCTATCCATATGGGGATGGG
ASCRP3001160	72	74	71	93	70	236.5	84.5	126.5	65	302.5	250	208	hsa_circRNA_104736	hsa_circ_0086414	circBase	chr9	-	16435552	16437522	exonic	NM_017637	BNC2	ACAGTGGCTGGTTGCAATGCTGCATTCCCCTCTCGCCGAAGCCGAGACAGGATGCTGCTG
ASCRP3001162	216	683.5	625.5	524	187	2633	1148.5	1422	281	2353	2348	2687	hsa_circRNA_100423	hsa_circ_0006267	circBase	chr1	+	198247090	198266370	exonic	NM_133494	NEK7	ACAGTGTGACTACCCACCTCTTCCTTCAGATCACTATTCAGAAGAACATTTTAAGAAGCA
ASCRP3001163	54	141	220	237	172.5	78	226	541	188	213	308.5	226.5	hsa_circRNA_405952		25070500	chr2	-	122125405	122135069	sense overlapping	NM_015282	CLASP1	ACAGTGTGCTGTGCTGCAGGTTATCCCTAGGCTAAAAGAGAACTCTGTATGAGTTAAATG
ASCRP3001164	25.5	57	70	34.5	30	46	68	170.5	56.5	87	78	59	hsa_circRNA_404635		25070500	chr1	+	193332350	193334904	sense overlapping	NR_125789	LINC01031	ACAGTGTGTCAGGAGGTGTTTCTAGAGAGCTATCTTATCACCAACATCACCAAGTATGCT
ASCRP3001165	25	20	24	32	29	49.5	51	117	66	78	204.5	133	hsa_circRNA_404693		25070500	chr1	+	243542022	243589860	exonic	NM_006642	SDCCAG8	ACAGTGTGTCCAGCATGGGAGAGTACATGAGACGATGAAGCAAAGGAAATAGAGAAATTG
ASCRP3001167	24	23	22.5	34	35	44	32	21	25	79	60	57	hsa_circRNA_100752	hsa_circ_0020976	circBase	chr11	-	5367002	5368140	exonic	NR_038321	OR51B5	ACAGTTAGATCTCATCTCTATGGGTGGAAGATGTTGAGAAGGAACAACATGATCTAAGTC
ASCRP3001168	24	24	21	29	30	311.5	50	112	138	1017	1829.5	1256	hsa_circRNA_009110	hsa_circ_0009110	circBase	chr18	-	19144163	19148055	exonic	NM_052911	ESCO1	ACAGTTGATTATAAATTTCAGCCAATGTTTGGAATCCAAGCTAGAAAACAGTCCAGTGGA
ASCRP3001169	19	20.5	17	18.5	20	66	25	30	22	283	344	246	hsa_circRNA_103894	hsa_circ_0073035	circBase	chr5	+	74639677	74640157	exonic	NM_000859	HMGCR	ACAGTTGTCATTCACTTCTTAGACAAAGAATTGACAGGCTTGAAGATGTTTTGAGCAGTG
ASCRP3001170	44	33	27	34.5	135	406.5	49.5	50	60	734.5	1238.5	883.5	hsa_circRNA_100279	hsa_circ_0003069	circBase	chr1	+	93301746	93303190	exonic	NM_000969	RPL5	ACATAAAGAACAGCGTAACTCCAGACATGCTTCTCAATAGGTTTGGCATGGACAAGATCT
ASCRP3001171	48	62	55	52	40	124	56	44	50	247	169	122	hsa_circRNA_406007		25070500	chr2	+	190584297	190585513	exonic	NM_144708	ANKAR	ACATAAAGGCCTCCCATATCTTATCAGATTTCTGAGTTCTGATTCAGGCACCATTCCTGC
ASCRP3001172	22	25	22	25	36	38	34	43.5	29	82.5	58.5	50.5	hsa_circRNA_102862	hsa_circ_0004305	circBase	chr2	+	179400458	179407088	exonic	NR_038272	TTN-AS1	ACATACTCATTTCCTTCGGTGATCACAGGATCTGGTTTGCCACTGAAAGGAATCTTGATG
ASCRP3001173	21.5	21	20	19	21	50	42	224	68	123	159	133	hsa_circRNA_000982	hsa_circ_0000982	circBase	chr2	+	24357988	24369956	exonic	NM_001145710	FAM228B	ACATAGAAAGTGAATTTTGTAGAAGGAGAAGGTTTTAGCTAAAGAAGATACTGAGGCAGC
ASCRP3001175	47	36	30	51	56	168.5	69.5	116	91	163.5	249	195.5	hsa_circRNA_402346		25242744	chr2	+	113258782	113260758	exonic	NM_153712	TTL	ACATATAATAAGGTGAAGGCATTCTCATCTCCTCAGAGGCTTCAGAGCTTCTCGATTTCA
ASCRP3001178	25.5	21	20	24	23	137	40.5	130	92	177	246	193	hsa_circRNA_070520	hsa_circ_0070520	circBase	chr4	-	103226145	103236987	exonic	NM_022154	SLC39A8	ACATATGGTCAGTGTTTAACTGCTGAAGAGATCTTTTCCCTTCATGGCTTTTCAAATGCT
ASCRP3001179	25	25	26	26	25	68	34	31	30	106	121	69	hsa_circRNA_061372	hsa_circ_0061372	circBase	chr21	-	30428647	30437426	exonic	uc002yna.3	CCT8	ACATATTGTTACTGTCAAGGCTCTGGTATCAGTTCCTCTTCAGTATTGCATGGCATGGTT
ASCRP3001180	28	24	21	21	20	46	46.5	167	89	124	168	128	hsa_circRNA_406427		25070500	chr3	+	197559067	197566268	exonic	NM_032773	LRCH3	ACATCAAAACAGCCTACAGATGAATTTTCAGATCTGCCTCTTCGAGTAGCAGAGATTACT
ASCRP3001181	19	23	22	22	22	40	30	38.5	26	60	63	59	hsa_circRNA_101235	hsa_circ_0029762	circBase	chr13	-	25049609	25052414	exonic	NM_006437	PARP4	ACATCAAAGGGAGAATCATAGACACTGTAGCCCAGTACAAGTATCAAGTACTCACACCCG
ASCRP3001182	186	71	64.5	100	49	4641.5	879	1514	1867	5392	9401	6135.5	hsa_circRNA_103642	hsa_circ_0001411	circBase	chr4	+	54249939	54256040	exonic	NM_030917	FIP1L1	ACATCAAGACAGGGGGAAGAGTTTATGGAACTACAGAAAGTGACTGAGACCGAAGATGAT
ASCRP3001183	56	50	43	80	74.5	90.5	76	90	48	283	315	202	hsa_circRNA_406076		25070500	chr2	+	243056789	243081039	exonic	NR_130699	LOC728323	ACATCAAGAGACCTATCAAGACCTGTATCCAGGAAAAGTATCTTAAATAGCGAAGATGGA
ASCRP3001184	20	23	22	20	20	88	63	196	166	200	390	276	hsa_circRNA_007658	hsa_circ_0007658	circBase	chr9	+	36597218	36643080	exonic	NM_014791	MELK	ACATCACAGAAACAACAGGCAAACAATGGAGGATTTAATTTCACTGGAAAATTTGCTGTT
ASCRP3001187	22	21.5	18	27	24	81.5	32	85	44.5	97	126	103	hsa_circRNA_001483	hsa_circ_0001483	circBase	chr5	-	54562965	54568003	exonic	NM_019030	DHX29	ACATCACTGTTAACCCTAGAGATTGTTTTAGCAACCAATATTGCAGAGACGGGTATCACT
ASCRP3001188	22	22	20	19	21	39	28	23	22	73	82.5	70	hsa_circRNA_009725	hsa_circ_0009725	circBase	chr1	+	10460449	10480201	exonic	uc001arc.3	PGD	ACATCAGACTGAGTCTGTGCTTTTAATAGGACTGTCTCCAAAGTTGATGATTTCTTGGCC
ASCRP3001189	28.5	22	22	31	26	171	85	324	161	555	1319.5	738.5	hsa_circRNA_402193		25242744	chr2	+	30775358	30791042	exonic	NM_001304446	LCLAT1	ACATCCAAGAACTACAGGCTTTACTTTTGTGGTAGACCGTCTAAGAGAAGCACAGTCACA
ASCRP3001190	1596	4751.5	3991	4212	1806	15776	3933	7183	905	14145	15894	13879	hsa_circRNA_063981	hsa_circ_0063981	circBase	chr22	-	50904191	50904269	exonic	NM_002972	SBF1	ACATCCACCTCCTCCCTGAAGATGCAGGTCCTGGACCCGGAGCTGGAGTTGGCTGACCTC
ASCRP3001192	96	130	128	167.5	126	2050	333	1401	723	4702.5	8230	5196	hsa_circRNA_100118	hsa_circ_0011122	circBase	chr1	-	28365349	28369161	exonic	NM_001990	EYA3	ACATCCCTCGCTCATCCAATGATTATACCTCACAAATGTATTCTGCAAATCAAGTAAGCA
ASCRP3001193	25	21	21	21	24	62.5	51	173	74.5	89	154	112.5	hsa_circRNA_102532	hsa_circ_0008813	circBase	chr19	+	34942885	34955036	exonic	NM_005499	UBA2	ACATCCTTCATAGGAGAAGAAACGAATGCATCAGATCAACAGAATGAACCCCAGTTAGGC
ASCRP3001194	33	25	18.5	29	25	1081.5	68	150	113	1486.5	4286	2492	hsa_circRNA_102525	hsa_circ_0050518	circBase	chr19	+	34922765	34955036	exonic	NM_005499	UBA2	ACATCCTTCATAGGTTGCCAAGGAAAGTGTACTGCAGTTTTACCCGAAAGCTAATATCGT
ASCRP3001197	35	39	36	27.5	28	70	131	155	78	101	166	123	hsa_circRNA_103169	hsa_circ_0062432	circBase	chr22	-	22057658	22065197	exonic	NM_013313	YPEL1	ACATCTACTGCGAGAACTGCAAGACCACGCTCGGGTGGAAATACGTTACGTTTTTCTCTC
ASCRP3001200	34	30	26	37	36	141.5	43	61	65.5	222	292	227	hsa_circRNA_004889	hsa_circ_0004889	circBase	chr15	+	57383986	57387361	intronic	ENST00000560190	TCF12	ACATCTTTTTGGCACATCACTAGGGTTTTACAGACAGCCCTCATTACAGTGATCACTTGA
ASCRP3001201	21	20	20	24	24	38	30	36	24	78	110.5	77	hsa_circRNA_001767	hsa_circ_0001767	circBase	chr7	-	148809228	148815440	exonic	NM_001001661	ZNF425	ACATGAAGAATACTGGAAAGTTGCTATGTTTTGGTAACTGTGACATTTGATGATGTGGCC
ASCRP3001203	34.5	27	25.5	47	28	513	260.5	1110	660	1333	2167.5	1581	hsa_circRNA_007460	hsa_circ_0007460	circBase	chr17	+	28811231	28819771	exonic	NM_004871	GOSR1	ACATGACCACCTTCGAAATTCTGATACAACACCCCTTTTAAATGGATCAAGCCAAGACAG
ASCRP3001204	22	20	19	20	21	58.5	26	20	22.5	95	140	119	hsa_circRNA_103616	hsa_circ_0069380	circBase	chr4	+	26614790	26622310	exonic	NM_018317	TBC1D19	ACATGAGGAAAGCACAGGCCAGTCTTCAGAGACCTGAGATTAAACTTGAATCACTGAAAG
ASCRP3001205	22	21	19	22	23	35	27	21	22	66.5	66	68	hsa_circRNA_008399	hsa_circ_0008399	circBase	chrX	+	48433555	48435497	exonic	NM_006743	RBM3	ACATGCACATAATATAGGACTTGAACTGCCATGTCCTCTGAAGAAGGAAAGCTCTTCGTG
ASCRP3001206	70	58	45.5	48	46	55	63	71	80.5	91	120.5	101	hsa_circRNA_103311	hsa_circ_0064651	circBase	chr3	+	30029633	30032700	exonic	NM_001003792	RBMS3	ACATGCACCTGCATATTCTTACCAACAGTCTAATATATGACTGCTGCTGCTCCTATGCAA
ASCRP3001207	27	24	20	27	20	317	59	178	138.5	623	1314	859	hsa_circRNA_405209		25070500	chr14	-	39623414	39628754	exonic	NM_001079537	TRAPPC6B	ACATGCATCTAAGGAAAACGGACGATGTATTACTAAGCTGGAAAACATGGGGTTTCGAGT
ASCRP3001208	75	78	82	183.5	96	135	5171.5	3316.5	938	506	1163	677	hsa_circRNA_104327	hsa_circ_0001971	circBase	chr7	-	23015828	23023664	exonic	NM_032581	FAM126A	ACATGCCCAGTGTTTCTCTTCAGTCACTGTGTCAAATTTGTTCAAGACATTACCAGAAAC
ASCRP3001210	161	156	115	95	76	151.5	138	130.5	150	186	216.5	182.5	hsa_circRNA_006471	hsa_circ_0006471	circBase	chr19	-	11623870	11625036	exonic	NM_016581	ECSIT	ACATGGAGCCTGACCTTAGTGCCAGGGTCACCATCTACCAGGTCCCTCGCCGGCTCCCTC
ASCRP3001211	20	21	18	22	21	38	30	35	27	77.5	102	69	hsa_circRNA_100170	hsa_circ_0011589	circBase	chr1	-	36212366	36212593	exonic	NM_022111	CLSPN	ACATGGAGGAACTTCTGAACCTTTGTTCAGGAAAATTCACTTCTCAGGGTTCTTAAATGT
ASCRP3001212	91	69	84	162	147	888	108.5	198	136	1825.5	2528	1216	hsa_circRNA_003613	hsa_circ_0003613	circBase	chr1	-	52283737	52299842	exonic	NM_002525	NRD1	ACATGGGCACTTCCTCCTCAACAGCAACATTACAGTGGTATTCATGGGTAGTTTGAAATA
ASCRP3001213	28.5	25	20	28	24	56	35	66	40	136	177.5	141	hsa_circRNA_404106		25242744	chr8	+	126021212	126021585	exonic	NM_003129	SQLE	ACATGGTTGAAAAAATTTACCCACAAATACCTGGAACTCCATGCTCCACTGACTGTTGTT
ASCRP3001214	21	24.5	22	23	19	73	39	62	53.5	202	352.5	232	hsa_circRNA_102372	hsa_circ_0047721	circBase	chr18	+	51797729	51813781	exonic	NM_007195	POLI	ACATGTAATTCAGAAATTAGGGACAGGAGTTCATGATCAAGTGTTGCCCACACCAAATGC
ASCRP3001215	21	31	24	23	22	164	42	89	74	336	526	324	hsa_circRNA_054963	hsa_circ_0054963	circBase	chr2	+	64796225	64800202	exonic	NM_017657	AFTPH	ACATGTACATCTGATCAGTTCCAGGGAATTGCTAGATGTGTGGACTGAGCTACAGGATAT
ASCRP3001216	41	30	28.5	35	41	178	73	209	162	452	852	569	hsa_circRNA_101103	hsa_circ_0007127	circBase	chr12	+	70671911	70704797	exonic	NM_014515	CNOT2	ACATGTACTACAGCCAGTCTTCTATGTTTCCACATCGGTCAGAAAAAGATAGGGAGACGT
ASCRP3001217	47	39	36	73.5	60	54	61	65	41.5	102	100.5	79.5	hsa_circRNA_404493		25070500	chr1	+	43239233	43241193	sense overlapping	NM_024097	C1orf50	ACATGTAGGTGACTCACAAACTTCTTGGAAAGAGACCCTGTGTGAATGCTGATGAATTCA
ASCRP3001218	26	25	23	34	32	44.5	39	69	64	205	229	173	hsa_circRNA_102338	hsa_circ_0047347	circBase	chr18	-	29210921	29238052	exonic	NM_004775	B4GALT6	ACATGTATATATTATCCCGAAGGCAATAATTCAAGTGATTATCTTGTTCAAACAACAACG
ASCRP3001219	53	40	21	27	26	95	72	68	50.5	202.5	210	205	hsa_circRNA_104626	hsa_circ_0084522	circBase	chr8	-	54891584	54923052	exonic	NM_006756	TCEA1	ACATGTGGCAAATGTAAAAAGAAGAATTGCACTTACACACAGGCTGGAGCATTGGATTTG
ASCRP3001220	27	24.5	25	25	31	64	33.5	26	26	128	114	85	hsa_circRNA_104995	hsa_circ_0090429	circBase	chrX	+	47100675	47100849	exonic	NM_004651	USP11	ACATGTGTTCAAGTGCCTCAGCAATGTGCCACAGCTCACCGAGTACTTCCTCAACAACTG
ASCRP3001221	24	20	19	22	23	54	33	117.5	39	74	75	74	hsa_circRNA_001454	hsa_circ_0001454	circBase	chr4	+	154524454	154533552	exonic	NM_015196	KIAA0922	ACATGTTTTCTGAGAAACAGGACATACCTTTCGTAGAGTTTGTCCCTGTTGGGTGTGATT
ASCRP3001222	21	23	19	26	26	36.5	35	24	27	65	93	80	hsa_circRNA_401201		25242744	chr13	-	111315797	111357918	exonic	NM_024537	CARS2	ACATTACTATTAAGGTATAGCTGTGGACCAACTGTATATGATCATGCGCACCTTGGCCAT
ASCRP3001223	21	50	95	35	35	44	50	151	61	105	218	147	hsa_circRNA_100883	hsa_circ_0005918	circBase	chr11	-	72695132	72700142	exonic	NM_014824	FCHSD2	ACATTATGAAGTGTGTGGACCAGTTGACAAAGATCCAAACTGAATTACAAGAGACAGTGA
ASCRP3001224	28	28	22	41	35	300	150	321	160	535.5	1117	685.5	hsa_circRNA_100289	hsa_circ_0000097	circBase	chr1	+	100889777	100908552	exonic	NM_003672	CDC14A	ACATTATGAGGTAATCTATTTAAAGAAGACACCAGAAGAAGCCTACAGAGCACTCCTGTC
ASCRP3001225	53.5	37	35	28	36	129	28	22	25	133	133	127	hsa_circRNA_406313		25070500	chr3	+	100348441	100438902	sense overlapping	NM_006070	TFG	ACATTATTTGGAAAATCTACTTCCTCATCAAGCACCCCTACAGAGTTCTGCAGGAATGGT
ASCRP3001227	26.5	33	26	30	25	37	37	30	25.5	74	71	63.5	hsa_circRNA_009128	hsa_circ_0009128	circBase	chr16	-	11815432	11830089	exonic	NM_015914	TXNDC11	ACATTCATTAAAGAAAGTCGAGCAAAAGATGTGATAATACCAGCAAAGCCACCTGTCAGC
ASCRP3001228	20	20	22	19.5	21	32	26	25	26	66.5	67	58	hsa_circRNA_404345		25242744	chrX	+	24075537	24075871	exonic	NM_001415	EIF2S3	ACATTCCAGGGACCAAAGGGAACTTCAAATTAGTCAGGTACAATTGGTCATGTAGCTCAT
ASCRP3001229	28	24	24	23	26	38	28	21	27	75	75	61	hsa_circRNA_103346	hsa_circ_0065182	circBase	chr3	+	47361142	47364198	exonic	NM_025010	KLHL18	ACATTCCTTCGAGAACGATTGGGGACCACAAATTCAGTGCCCACCGGATTGTCTTAGCAG
ASCRP3001230	17	23	19	21	22	44	29	28	24.5	88.5	125	99	hsa_circRNA_406482		25070500	chr4	+	56883813	56890780	exonic	NM_025009	CEP135	ACATTCTCCTGAACATAGAAATGTGTAATTATCAGAAAGCACATAAATGCCCATCATGCT
ASCRP3001231	22	26	24	25	25	54	38	51	55	143.5	216.5	151	hsa_circRNA_000283	hsa_circ_0000283	circBase	chr11	-	33127112	33127610	exonic	NM_001326	CSTF3	ACATTGAACAGCTCTGGAGAGACTATAACAAGTATGAAGAGAGAAAAAATGGCTCAAGCA
ASCRP3001232	40	27	26	38	22	1167	150	416	295	1913.5	3924	2252	hsa_circRNA_101462	hsa_circ_0034168	circBase	chr15	-	25650607	25654354	exonic	NM_000462	UBE3A	ACATTGAAGCTAGCCGAATAGTTATTAAGCCTACGCTCAGATCAAGGTAGCAGCTAGACT
ASCRP3001233	35.5	24	25	52	55	48	34	29	29	86	96.5	91	hsa_circRNA_000532	hsa_circ_0000532	circBase	chr14	+	45564423	45566208	exonic	NM_017922	PRPF39	ACATTGGACCCTGGTGATCCTGAGACAAACAATACAATAAGAGGATCGTTAACTGAAGAC
ASCRP3001234	23	24	20	26	24	62	50	181	118	143	168	146	hsa_circRNA_102318	hsa_circ_0008741	circBase	chr18	+	19353584	19359646	exonic	NM_020774	MIB1	ACATTGTAGTACAGTATCCAAGTGGCAATAGGTAACAGAAATCCAGGACTGGAGTGCATC
ASCRP3001236	24	25	22	26	23	61	45	33	24	93	85	81	hsa_circRNA_080788	hsa_circ_0080788	circBase	chr7	+	75933300	75933614	exonic	NM_001540	HSPB1	ACATTTATCTTCTGTTTTTCTCAAATAAAGTTCAAAGCAACCACCTGTCAGCTGCCCCCC
ASCRP3001240	47	37	31	41	50	61	41	24	35	94	82	65	hsa_circRNA_406736		25070500	chr6	-	8093409	8095466	intronic	ENST00000379715	EEF1E1	ACATTTTTAAGATCACCTCGCCTGGCCAGTAAACTGTTTTTTTGTTCACCGACAATGTGT
ASCRP3001241	28	24	23	26.5	30	145	30.5	27	25	162	231	178	hsa_circRNA_030131	hsa_circ_0030131	circBase	chr13	+	42739466	42742954	exonic	NM_152910	DGKH	ACCAAAATGTTGGACAGGTACACACTGCCTGCAAAGATTTATACCATCCAATATGTCCAC
ASCRP3001242	29.5	23	20	45	30	118	58	305	109	702	1192.5	620.5	hsa_circRNA_101574	hsa_circ_0008378	circBase	chr15	+	68434283	68439038	exonic	NM_016166	PIAS1	ACCAAACACGATTGTTGTTTCTTGGACTGCAGAAATTGGAAGACATCAGACAACAGTCAG
ASCRP3001243	74	58	35	71.5	61.5	151	105	123	91	227	322	234	hsa_circRNA_401790		25242744	chr17	+	37646809	37646986	exonic	NM_015083	CDK12	ACCAAAGGCAATCACACCACCTCAGCAACCATATAAAAAGAGACCAAATCCAAAAGAAAC
ASCRP3001246	20	21	18	20	21	75.5	33	44	49	201	352	245	hsa_circRNA_406770		25070500	chr6	+	38045815	38050233	intronic	ENST00000373391	ZFAND3	ACCAACAAAAAGATCCTGTGGTACAGGTTACAGTGAAGTGAGTATGCAGATTTGACCCAT
ASCRP3001247	23	21	20	26	25	113	57	472	147	360	588	452.5	hsa_circRNA_101562	hsa_circ_0035943	circBase	chr15	-	66021409	66025156	exonic	NM_005848	DENND4A	ACCAACACTATTTCTCAGCATATTTCTCATTTTATGCATAAAGTTCCTTTTCCATCTCCT
ASCRP3001248	20	22	20	27	29.5	29	28	36	35	75.5	78	76	hsa_circRNA_024310	hsa_circ_0024310	circBase	chr11	-	113612415	113614762	exonic	NM_004724	ZW10	ACCAACATATCACAAATTATTCCTGATTCTAAGATAAATGTGCCAGAGTTACCCACTCCT
ASCRP3001249	29	22	21	34	36	34	36.5	56	44.5	70	68	65	hsa_circRNA_104236	hsa_circ_0078368	circBase	chr6	+	155095122	155136950	exonic	NM_014892	SCAF8	ACCAACCTGTTTGAAGAGTTTGGACAGATTGAATCCATTAATTTGTATTCCCTGAATGAC
ASCRP3001251	63.5	36	35	82	32	1725	349	1291.5	668.5	3264.5	6000	3874	hsa_circRNA_104518	hsa_circ_0005284	circBase	chr7	-	148543588	148544397	exonic	NM_001203248	EZH2	ACCAAGAATGGAAACAGCGAAGGATACAGCCTGTGCACATCCTGACTTCTAATAATCATG
ASCRP3001252	30	26.5	29	37	40.5	69	36	44.5	45	118	121	108	hsa_circRNA_103251	hsa_circ_0008199	circBase	chr22	+	46085591	46136418	exonic	NM_013236	ATXN10	ACCAAGACAAGAGAAACAGCACCCAGGACTATCTTCCAAAGAGTTCTGGATATCCTAAAG
ASCRP3001253	26	25	24	22	22	83	44	62	60.5	282	385	305	hsa_circRNA_103254	hsa_circ_0001247	circBase	chr22	+	46125304	46136418	exonic	NM_013236	ATXN10	ACCAAGACAAGAGTTACACTGTTAGACCTTATGATAGCCAAGATAACGAGTGATGAGCCA
ASCRP3001254	51	71	97	63	55.5	71	58	68	49	132.5	118	123.5	hsa_circRNA_001991	hsa_circ_0001991	circBase	chr5	+	80299959	80338802	sense overlapping	NM_006909	RASGRF2	ACCAAGCCAGGCACCTCTGATCACAGCCTAAGAGCATGTAAGGTTCTCTGGAAGGATTTG
ASCRP3001255	18.5	20	18.5	21	21	43	34	84	68	96	135	103.5	hsa_circRNA_004516	hsa_circ_0004516	circBase	chr12	+	110922882	110925748	exonic	NM_013300	FAM216A	ACCAAGGAAACTGTTCATGCAAACAGATAGAATCAAAGATGGATACAAAGTGAACTCACA
ASCRP3001256	50	47	41	58	57	70	67	90	96	106.5	116	78	hsa_circRNA_048085	hsa_circ_0048085	circBase	chr19	+	676388	683392	exonic	NM_005860	FSTL3	ACCAAGGAAATAAAGACTCAAGCCATTTGGGAAGTCGGTGCCGCTGCCGTCTCTGCGTTC
ASCRP3001257	23	21	21	20	25	39	30	26	25	93	102.5	84	hsa_circRNA_103474	hsa_circ_0067344	circBase	chr3	+	130851588	130852800	exonic	NM_024800	NEK11	ACCAAGGCTATGACACAAAGTCGGACATCTGGAGGATACTTCATCGAGACTTAAAGTCAA
ASCRP3001258	30	26	26	29	20.5	62	121	800.5	286	182	341.5	201	hsa_circRNA_104333	hsa_circ_0001685	circBase	chr7	+	24663284	24690331	exonic	NM_016447	MPP6	ACCAAGTTATAGAGATACCATTACTCCTCAACAGCAATGCAGCAAGTCTTGGAAAACCTT
ASCRP3001259	47.5	44.5	49.5	49	42.5	133	51	37.5	61	272	200.5	200	hsa_circRNA_100492	hsa_circ_0016979	circBase	chr1	-	233353644	233372726	exonic	NM_014801	PCNXL2	ACCAATACACAGAGATGCAGGTCAGCTCCTCCAGTACCACAACTTCTGAGAGTCAAGATC
ASCRP3001260	26	20	22	23	23	54	40	38	69	148	192	165	hsa_circRNA_100491	hsa_circ_0003314	circBase	chr1	-	233353644	233363117	exonic	NM_014801	PCNXL2	ACCAATACACCATGTGAGTCAGGATCTGGAAGCCTCGTCATGTTCTTCAACACAAGGAAA
ASCRP3001262	176	455	269	328	226	3436.5	325	480	126.5	4015	2919	2616	hsa_circRNA_004646	hsa_circ_0004646	circBase	chr1	+	162546566	162567648	exonic	NM_003115	UAP1	ACCAATCCAATGTGAAATCTCTCCTCTTATCTCCTATGCTGGAGAAGACTTTTCCAGATT
ASCRP3001263	27	25.5	23	31	66	54	31	36	33	115.5	261.5	166.5	hsa_circRNA_103810	hsa_circ_0072099	circBase	chr5	-	32415073	32417897	exonic	NM_016107	ZFR	ACCACAGCAGTTACATATTCTGGATTCATACTCATATGTAAGGTCCACAGCTCCTGCTGT
ASCRP3001264	28.5	25	25	24	21	42	151	496	246	160.5	215	149	hsa_circRNA_103925	hsa_circ_0001522	circBase	chr5	+	122881110	122893258	exonic	NM_004384	CSNK1G3	ACCACAGCTACATTTGGAATACAGATTCTATAAGCAGTTAGGATCTGGAGCTCTCTATCA
ASCRP3001265	21	24	20.5	33	36	59	49	113.5	61.5	158	330	238	hsa_circRNA_406543		25070500	chr4	+	144378832	144387378	exonic	NM_207123	GAB1	ACCACCACGTAAGGTCAAAGTCCTAAAATTTTAAGACTCAAACCCCATGGTTTAGAGCGA
ASCRP3001266	37	29	27	30	25	121	68.5	107	82.5	110	199	145	hsa_circRNA_101678	hsa_circ_0037353	circBase	chr16	-	1872300	1873038	exonic	NM_005326	HAGH	ACCACCACTGGTCCAGCCCTGCTGGGAGTTTTCTGCCACACAGATTTGCGGAAGAACCTG
ASCRP3001267	19	20	20	27	21	35	28	22	28	71.5	66	55.5	hsa_circRNA_105003	hsa_circ_0090868	circBase	chrX	-	62885765	62898452	exonic	NM_015185	ARHGEF9	ACCACCAGATGGTCCTCTGCAAGAAGCAAGATGGATTCTGGATATACTCTGAGTATTGTA
ASCRP3001268	21	24	18	27	29	251	77	180.5	115	514	1317.5	700	hsa_circRNA_015169	hsa_circ_0015169	circBase	chr1	+	169767997	169770112	exonic	NM_018186	C1orf112	ACCACCTGACATTGGAACAGACTTTCTTTTCACAAGTGTTACCAAAGGTTTGTTCTGAGT
ASCRP3001270	24	23.5	20	28	30	34	32	24	28	61	51	54	hsa_circRNA_403101		25242744	chr4	-	25831719	25836945	exonic	NM_015187	SEL1L3	ACCACTAGCATTGGACAGGATTTGAAAAGCTACCACAATCAGACCATTAGATGTGGTTGC
ASCRP3001272	120	104	132	311	172	2554.5	269	2083	1052.5	6064	9374	7252.5	hsa_circRNA_102983	hsa_circ_0005265	circBase	chr20	+	2928627	2945848	exonic	NM_002836	PTPRA	ACCACTCCAGAAACTTTCCCTCCTTCAGGACACATGTTCAAAGAGCATAATTAACTTTTT
ASCRP3001273	29	34.5	53	62.5	53	64	65.5	258.5	143.5	105	111	95	hsa_circRNA_003074	hsa_circ_0003074	circBase	chr10	+	12123470	12133683	exonic	NM_018706	DHTKD1	ACCACTCCAGCTGAAAGAGGAAGGTCTTCTTTATACTGCAGTGATATTGTTGATCATGGC
ASCRP3001274	50	64	51	54	49	494	74.5	99	82.5	397	475.5	327.5	hsa_circRNA_103337	hsa_circ_0065052	circBase	chr3	-	44986659	45000952	exonic	NM_016598	ZDHHC3	ACCACTGCAGATGCCAGTATGGACAGAATAGCTTATGATGCTTATCCCCACCCACCACTT
ASCRP3001275	42	58.5	45	65	41	130	95	151.5	62	211	279	195.5	hsa_circRNA_403676		25242744	chr6	-	99930628	99958106	exonic	NM_001080481	USP45	ACCACTTTCTCCTAAAGTTCTTTTTAATCAGCTTTGTCAGAATAAATAACAGATGCGGGT
ASCRP3001276	26	21.5	20.5	26	22	126	51	50	65.5	225	355	259	hsa_circRNA_102568	hsa_circ_0051449	circBase	chr19	+	45766370	45769539	exonic	NM_031417	MARK4	ACCAGAAAAATATTGTACACAGGGACCTGAAGGTTGCCATCAAGATTATCGACAAAACCC
ASCRP3001277	21	25	23	22	25	36	33	30	23	68.5	102	71	hsa_circRNA_404874		25070500	chr11	+	33065295	33076271	exonic	NM_018393	TCP11L1	ACCAGAAAACAGGAAAGTGAATAAACTTAATTGAGAATGTCTGAAAACCTTGACAAGTCC
ASCRP3001278	26	56.5	48	29	26	40	45	45	45	459	166	235	hsa_circRNA_007809	hsa_circ_0007809	circBase	chr14	+	50190591	50192487	exonic	NM_172193	KLHDC1	ACCAGAAATTAAAACTAATATATTTTGGTGGTTATGGGTGTAGGAGACACAGTGAACTCC
ASCRP3001279	19	19	22	22	23	36	30	23	25	71	83	65.5	hsa_circRNA_104171	hsa_circ_0077574	circBase	chr6	+	109249290	109258202	exonic	NM_032131	ARMC2	ACCAGAAGAAGCAGGTGACTGCTACATTGAGAAACTTGGTTGATTCATCATTAGTAAGAA
ASCRP3001280	25	22	19	25	26	43	28	21	26	65	68	61	hsa_circRNA_405562		25070500	chr17	+	29311641	29311945	intronic	ENST00000443677	RNF135	ACCAGACATGGATGATTGGACATTTGGAATGCTTGAGTAGAGAAGAGCATCACAGAAGTT
ASCRP3001281	33	36	31	27	25	114	173	949	261	272	429	284	hsa_circRNA_403266		25242744	chr4	+	178272533	178274882	exonic	NM_018248	NEIL3	ACCAGAGCTTAAAAGCTGCAACCCTGGATATTCTAACAGCAAGCTACCGACTAGAAATAC
ASCRP3001282	27	26	22	31	32	574	58	163	113	1340	2987	1856.5	hsa_circRNA_100671	hsa_circ_0019632	circBase	chr10	-	103716353	103717489	exonic	NM_024541	C10orf76	ACCAGAGCTTTGACAACCTCTACTCCATGGCCTTGATAAATTTGCTGAAGTTCCTTATGT
ASCRP3001283	24	26.5	26	23	22	92.5	74	662	186.5	165	145	107.5	hsa_circRNA_100352	hsa_circ_0000137	circBase	chr1	-	155408117	155408859	exonic	NM_018489	ASH1L	ACCAGAGGAAGAAGAGCAAGAGAATAATAAAAGTAAACGGAGTTCCCTCTCGAAGTCCAA
ASCRP3001285	38	40	39	62	77	102	91	373.5	124	129	123	91	hsa_circRNA_104179	hsa_circ_0077705	circBase	chr6	-	116966876	116982009	exonic	NM_145062	ZUFSP	ACCAGATATTGGCAGTAGAGGGTGCTCTTTCTCTAGAGGAGAAACTTACTGTGATCAACC
ASCRP3001287	20	21	18	20	18	60	29	35	31	101	116	100	hsa_circRNA_001616	hsa_circ_0001616	circBase	chr6	-	86235843	86251761	exonic	NM_020468	SNX14	ACCAGATGTAAATCTTGTATTTCAGACAACTTTTAAGAGGTGCAGAATCACCAACACGCA
ASCRP3001288	27	23	26	38	47	72	36.5	45.5	32	155	249	202.5	hsa_circRNA_102671	hsa_circ_0053829	circBase	chr2	+	32735592	32738221	exonic	NM_016252	BIRC6	ACCAGCACTCCTGGACCAAGAGCTCTTTGAATTTGAATAGTCCTTTACTTTTTGGAAGAC
ASCRP3001289	21	19	20	20.5	19	89	43	144.5	70	350	524	353.5	hsa_circRNA_405136		25070500	chr13	-	41826780	41828756	exonic	NM_004294	MTRF1	ACCAGCAGATTATGGCCTAAATAAACAAGATGAAAAGCAGTTACAAGAACTTGCACTGGA
ASCRP3001290	21	24	24	22	22	35	36	137.5	111.5	100	108	73	hsa_circRNA_008951	hsa_circ_0008951	circBase	chr7	-	22999874	23030758	exonic	NM_032581	FAM126A	ACCAGCATGTCAATAAGGGGTCATAGGTGGAAAAGACATGGTTGAAGGTTTAGAACAGAT
ASCRP3001291	67	79	67	104	88	816.5	110.5	64	76	971.5	655	489	hsa_circRNA_001741	hsa_circ_0001286	circBase	chr3	+	42132937	42134918	intronic	ENST00000484786	TRAK1	ACCAGCTAATCTTCCTACCCTTCAGTTCCCTTATGACTAGTGCCTTTGGAGTTTATGTCT
ASCRP3001292	26	19	20	23	21	31	33	57	32	70	73.5	69	hsa_circRNA_001814	hsa_circ_0001814	circBase	chr8	+	95839490	95854716	exonic	NM_017864	INTS8	ACCAGCTATTTCTTAGACCAAATAAAGAGAAAATAGACTTTCTTCTTGAGTTTGTCTGTT
ASCRP3001293	20	24	23	21	23	38	30	22	22	81.5	64	62	hsa_circRNA_001407	hsa_circ_0001407	circBase	chr4	+	42212390	42215180	intergenic			ACCAGCTCCTTGTCATGATTAAAAGCTGGAAGATACTCACCAAACAAACAAACAATGAAT
ASCRP3001294	24	19	18	30	27	156	53	130.5	92	543.5	806	644	hsa_circRNA_002863	hsa_circ_0002863	circBase	chr2	-	69585460	69590802	exonic	NM_002056	GFPT1	ACCAGCTTTACTACCTTGGTGGAGAGAGTTATCCAACAATTGAGCAACAAGATATGGATT
ASCRP3001295	26	23	20	27	28	39.5	26.5	24	21.5	59	58	62.5	hsa_circRNA_037933	hsa_circ_0037933	circBase	chr16	+	12995476	13297406	exonic	NM_001145204	SHISA9	ACCAGGAAAAGAGCTCAACAAGTACGCCTCCTTAAAGGCAGTCGCTCTTCAGCGCACTTG
ASCRP3001296	30	23	21	29.5	29	34	32	23.5	34	64.5	52	47	hsa_circRNA_001309	hsa_circ_0001561	circBase	chr5	-	177652366	177652583	intronic	ENST00000474052	PHYKPL	ACCAGGACGTGGTGGCATTTGATATATACCAAACAAACAAGCAAGTGACTGACTAGTTGA
ASCRP3001297	29	19	18	52.5	75	41	32	28	38	90	94	90	hsa_circRNA_018974	hsa_circ_0018974	circBase	chr10	-	81813151	81816161	exonic	NR_027428	TMEM254-AS1	ACCAGGGAAAAACTGGCTGGACAGTCTCTTGTCCTGTGTTTGTAATTGATATTTGATATT
ASCRP3001298	26	22	25	27	27	99	34	29	24	153	153	147.5	hsa_circRNA_087331	hsa_circ_0087331	circBase	chr9	-	84267098	84300811	exonic	NM_001303103	TLE1	ACCAGGTCTACCTCCTACACCTTAAATTGGAATGTGAGAAACTGGCAAGTGAAAAGACAG
ASCRP3001299	40	45.5	43	41	24	64	151	90	103.5	139	185.5	131	hsa_circRNA_000886	hsa_circ_0000886	circBase	chr19	-	8601135	8604912	exonic	NM_012335	MYO1F	ACCAGTACCAGATGGGGAGCACCAAGGTCTTTGTCAAGAACCCAGAGTCGGGCCTTCCTC
ASCRP3001300	23.5	22	21	25	36	100.5	38	21	25	81	80	88	hsa_circRNA_058695	hsa_circ_0058695	circBase	chr2	+	232952196	233199209	exonic	NM_152383	DIS3L2	ACCAGTCTCTTCTTTGCTGTTCTGGTCAAGGTAGTTAAACCAGAGAGCAATGACAAAGAA
ASCRP3001301	22	20	18	23	24	34	30	23	22	95	92.5	83	hsa_circRNA_103743	hsa_circ_0071023	circBase	chr4	-	143003183	143067149	exonic	NM_003866	INPP4B	ACCAGTTACACAAGGACTTCTTTATCCGAGCGCTGGATTGCATGAGAAGGACAGGGTGTG
ASCRP3001302	34.5	28	29	38	42	229	40	49	50	916.5	1015	567	hsa_circRNA_100544	hsa_circ_0017643	circBase	chr10	-	7325865	7327916	exonic	NM_001018039	SFMBT2	ACCAGTTGGTTGGTGTCAAGAGAATAAATACAGAATGGACCCACCTTCAGCAATCAAAGA
ASCRP3001303	26	29	24	20	20.5	37.5	31	20	26	61	59	54	hsa_circRNA_040749	hsa_circ_0040749	circBase	chr16	+	85839338	85840607	exonic	NM_001861	COX4I1	ACCAGTTTACCTGAATGTATCGCATTAAGTTCAAGGAGAGCTTTGCTGAGATGAACAGGG
ASCRP3001304	27	21	20	24	21	160	70.5	171	132	330.5	666	490	hsa_circRNA_405049		25070500	chr12	+	100598717	100601564	exonic	NM_022496	ACTR6	ACCAGTTTCAAGCAGTATTAAGAGTAAATGGGTTATTCCTAATTGTCAGTTCCGGTCAAA
ASCRP3001306	27	27	21	30	29	53	68	211.5	78	131.5	167	95	hsa_circRNA_100351	hsa_circ_0007608	circBase	chr1	-	155340294	155340774	exonic	NM_018489	ASH1L	ACCATAGCTGTGACCCAAATTGTGAAATGCAGAAATGAATGATCTTTGCTGAGTGTTCCC
ASCRP3001308	22	24	23	22	27	58	36	52	34	96.5	121	98	hsa_circRNA_103334	hsa_circ_0064996	circBase	chr3	+	43341245	43373802	exonic	NM_017719	SNRK	ACCATCCCATGTGTCTAAAGAGTGTAAAGAGAAAAAGAAGCAACTAACAAAACACTGTGA
ASCRP3001309	44	27	23	41.5	27	858	148	285	274	1448	3190	2179	hsa_circRNA_101096	hsa_circ_0027491	circBase	chr12	+	69210591	69218431	exonic	NM_002392	MDM2	ACCATCTACCTCATCTAGAAGGAGAGCAATTAGTGAGACAGGTTCTTTTTTATCTTGGCC
ASCRP3001310	22	20	20	20	18	1000	45	73	45	2398	3548	2314	hsa_circRNA_102727	hsa_circ_0054685	circBase	chr2	+	61009820	61010344	exonic	NM_022894	PAPOLG	ACCATCTAGAGTGGTCTTGCAGTCACAGATGAAATTCTTCAAGGAAAGTCAGATTGGTCC
ASCRP3001311	23.5	20	19	33	35	58	61	325.5	110	294	448	362	hsa_circRNA_100889	hsa_circ_0007458	circBase	chr11	+	76174864	76183884	exonic	NM_020193	C11orf30	ACCATCTGTGGTCATGTCAACAGTAGCACAAGGTGTAAGCTGTTCAGATGAAGATGAAAA
ASCRP3001312	25	19	20	25	28	49	37.5	45	28.5	91.5	100	92.5	hsa_circRNA_405232		25070500	chr14	-	52936754	52957723	exonic	NM_020784	TXNDC16	ACCATGAAAACAGACTGAAGTTGCTGAAGATCCTCAACAAGTTTCAACTGTCCATCTCCA
ASCRP3001313	23	24	19	28	27	305	53	167	101	1720	3838	2198.5	hsa_circRNA_004666	hsa_circ_0004666	circBase	chrX	-	154645235	154649223	sense overlapping	TCONS_00017391	XLOC_008269	ACCATGGCTCAGTGGAGTGTTTTACACAATCTGATTATATACATGAGTGCTTCGCTCCTG
ASCRP3001314	29	26	25	29.5	29	36	34	41	35	74.5	95	78	hsa_circRNA_103604	hsa_circ_0069227	circBase	chr4	-	15626874	15646331	exonic	NM_012161	FBXL5	ACCATGGTCTCAGCTTTCTAAAACCAATTTTTCCAACAACAACGATTTCCGTGCTCTTCT
ASCRP3001315	39.5	24	25	43	41	130	35	29	38	135.5	100	109	hsa_circRNA_401640		25242744	chr16	-	70301561	70316687	exonic	NM_001605	AARS	ACCATTCCCGTTCTTTGGGGTGACTTTCAAGATGGACTCTACTCTAACAGCAAGTGAAAT
ASCRP3001316	19	21	21.5	23	21	179	42	77	62	407	788.5	510	hsa_circRNA_103662	hsa_circ_0007096	circBase	chr4	+	76711302	76711950	exonic	NM_003715	USO1	ACCATTGATGACCATAAATACTGTATCAGAAGTTATTCGAGGCTGCCAAGTAAACCAAGA
ASCRP3001317	24	19.5	19	23	23	33	32	95	43	78	110	80	hsa_circRNA_100214	hsa_circ_0002632	circBase	chr1	-	47761436	47767420	exonic	NM_003035	STIL	ACCATTGGTGGGAATATGAAGAAGGTGTAACATTGACAGTAGATCGCTTTGATCCTGGTC
ASCRP3001318	23	22	20	27	28	148	42.5	96	82	339	658	451	hsa_circRNA_103520	hsa_circ_0005292	circBase	chr3	-	179310431	179319578	exonic	NM_020409	MRPL47	ACCATTTTCTCAGGAGCAGCATGGACCTGTCAGCAACTAAGGAACAAAAGTAATGAAGAT
ASCRP3001319	29	31	23	21	21	61	35	38.5	40	166.5	267	156	hsa_circRNA_005297	hsa_circ_0005297	circBase	chr3	-	179310431	179316559	exonic	NM_020409	MRPL47	ACCATTTTCTCAGGTATGTCTTACTGAAAGAAAGAAACATGCTTCTAACCCTAGAGCAGG
ASCRP3001320	20.5	19	21.5	19	19.5	53	27	28	27	180	255	182.5	hsa_circRNA_081849	hsa_circ_0081849	circBase	chr7	-	105105759	105111295	exonic	NM_019042	PUS7	ACCCAAAGCATAAAACTGAAAAGGGCTACTTGGTTAAATGCAGAGAAGAATGGGCAAAGA
ASCRP3001321	23	24	19.5	28	32	67	33	177	79	109	115	110.5	hsa_circRNA_404944		25070500	chr11	+	124856637	124858030	exonic	NM_025004	CCDC15	ACCCAAATGTCAGGACCAAGATTTTCTACCAAAATATCAGGAACTTGACTATGAGGAACC
ASCRP3001322	19	21	18	19	20	35	34	54	40	87	99.5	90	hsa_circRNA_003316	hsa_circ_0003316	circBase	chr8	+	38677039	38678153	exonic	NM_006283	TACC1	ACCCAAGAAGGCAAAGTCGCGTTTAATAACAATCACAAGAAGCTGATGAACAGCTTGTAG
ASCRP3001324	23	22	23	26	23	1953	73	336	338	5308	12155	6835	hsa_circRNA_000581	hsa_circ_0000569	circBase	chr14	+	102659799	102661457	exonic	NR_038354	WDR20	ACCCAATCAAAAAAGAAACTAGCAAACTTTTTAATGAGGAAACAATCCCATGAGGTTGGT
ASCRP3001326	21	25	24	20	21	37.5	27	25	22.5	64	74	65.5	hsa_circRNA_002107	hsa_circ_0002107	circBase	chr5	+	61846193	61897675	exonic	NM_016338	IPO11	ACCCACAGAACAAGATAAGAGGAAAAAGATGGTTGTGGAAAATGCCCTTAAAGTGAACCC
ASCRP3001327	19	18	18	21	20	44	33	53.5	32	66.5	138	102	hsa_circRNA_406767		25070500	chr6	+	36862279	36884350	exonic	NM_001286635	C6orf89	ACCCAGAACCTGTTGTGGGGAGTAAGGAATCATTGTAGTCAATCATTTTCCAGTTCTCAG
ASCRP3001328	32	23	19	30	32	39	34	37	36	66	69	70	hsa_circRNA_402857		25242744	chr3	-	49083857	49114471	exonic	NM_017730	QRICH1	ACCCAGATGTGCTCTACTATATTTTCCTGTGTATTCAAAAGGAACCCTAAGGACTCTGCA
ASCRP3001330	27	21	21	23	24	42.5	35	61.5	48	105	144	129	hsa_circRNA_402191		25242744	chr2	+	29140758	29152576	exonic	NM_015131	WDR43	ACCCAGGGCTTAGAAAGTAACGATTTTGAAATGCTAAATGCAGGTCCGATCAGAAAACAA
ASCRP3001331	54.5	35.5	32	72	76	52	56	55	43	114	127.5	108	hsa_circRNA_072816	hsa_circ_0072816	circBase	chr5	-	69424179	69503572	exonic	uc010ixu.3	SMA4	ACCCAGTATATTCAAAGCTACAAGGGATTTGTTGACATAACGGGCTGGTGAATTACCAGA
ASCRP3001332	23	24	24	24	22	69	39	88	61	281	207	210	hsa_circRNA_405577		25070500	chr17	-	38547757	38548989	exonic	NM_001067	TOP2A	ACCCAGTTCCTAAAAAGAATGTGACAGTGAAGAAGACAGCAGCAAAAAGTACAAAGACAA
ASCRP3001333	33	39	38	43	35	142	37	34	36	191	156.5	151	hsa_circRNA_407188		25070500	chr9	-	74522734	74523039	intronic	ENST00000333421	ABHD17B	ACCCATCACCCAGTTAAACAAACAAAACTACCAATTAAAACGAAGTCCACTTCACTGTTT
ASCRP3001334	70	78.5	67	65.5	28	437	794	3234.5	1954.5	1428	1961	1483.5	hsa_circRNA_011167	hsa_circ_0011167	circBase	chr1	+	29313942	29314417	exonic	NM_203342	EPB41	ACCCATCTTTGGATCTTCATTCATTAAGCAGTGCAGAAACACAGCAACATCATGACAACA
ASCRP3001335	36	35	43.5	36	30	396.5	48	91.5	67	419	898	619	hsa_circRNA_085323	hsa_circ_0085323	circBase	chr8	-	109240495	109254142	exonic	NM_001568	EIF3E	ACCCCAAAGGTCGCGATAATATTATTGACCTCTTCCTTTATCAGCCACAATATATAATGA
ASCRP3001336	32	26	26	34.5	39.5	158	40	59	44	169	192	163	hsa_circRNA_406148		25070500	chr21	+	37653780	37664531	exonic	NM_005128	DOPEY2	ACCCCACACTGTCAGGATTCTAGAACTTCTAAAATTAAAGTTTGGGACATGCAGAGCAGT
ASCRP3001337	26	21	23	28.5	29	46	116.5	421	129	113	176	138.5	hsa_circRNA_008865	hsa_circ_0008865	circBase	chr10	+	70719561	70720005	exonic	NM_004728	DDX21	ACCCCAGTGAAGCTGCCAGTGAAGAAAGTAACAGTGAGATAGAGCAGAAAGAGAAAAAAG
ASCRP3001338	22.5	22	21	24	24	44	27	18	19	65	60	61	hsa_circRNA_406805		25070500	chr6	-	82201207	82223546	sense overlapping	ENST00000412306	FAM46A	ACCCCATCTGATTTATATGAAGATTCATCATTTCGCATTTCTGTAACCATGAATGAGGGT
ASCRP3001339	40.5	38	36	46	51.5	207	82.5	381	188	485	846	490	hsa_circRNA_007084	hsa_circ_0007084	circBase	chr10	+	22002700	22016857	exonic	NM_004641	MLLT10	ACCCCGAGGAAGTCTCTCGCCACGGTATTTATAACAGCAATGATGTAGCAGTATCGTTTC
ASCRP3001340	42	86.5	113	81	59	86	135	178	138	164	129	139	hsa_circRNA_011538	hsa_circ_0011538	circBase	chr1	+	35824525	35855699	exonic	NM_005095	ZMYM4	ACCCGCCTTCACAAAATAATGCAGGTGGTGGTATCATGGATACAGAAATGTCTGAAGATA
ASCRP3001341	26	27	28	20.5	21.5	34	29.5	20	28	58	63	56	hsa_circRNA_000596	hsa_circ_0000661	circBase	chr15	+	100645330	100645426	antisense	NM_139057	ADAMTS17	ACCCGGGAGATGGTGCTGTTGCCACCCACCAGGATGGTGGCTCTTTTGTAAAGACTGGTG
ASCRP3001343	58	63	53	73	75	39	50.5	48	82	62	67	60	hsa_circRNA_001288	hsa_circ_0000999	circBase	chr2	-	46795476	46795608	sense overlapping	NR_104182	LOC100506142	ACCCTAAAAGCTTGCTATATAAAGGATACTTTCTGGAGGTTGGTGGTCCAGTAGCACAGA
ASCRP3001344	34	44.5	43.5	57	51	423	140	524	233.5	1360.5	1329	941	hsa_circRNA_103523	hsa_circ_0068142	circBase	chr3	+	182602540	182605501	exonic	NM_014616	ATP11B	ACCCTCATGTGTTACAAAATAAGCCCACCCTTTATCGGAATCATGGGTAAAGAAGGAAGA
ASCRP3001345	29	29	28	54	56	193	39.5	40	65	865	830	770	hsa_circRNA_102830	hsa_circ_0001073	circBase	chr2	+	148653869	148657467	exonic	NM_001616	ACVR2A	ACCCTCCTGTACTTGTTCCAACTCAAGTGCTATACTTGGTAGATCAGAAACTCAGGAGTG
ASCRP3001346	28	25	25	34	32	48	36	28	27	85	79	66	hsa_circRNA_023420	hsa_circ_0023420	circBase	chr11	-	71808337	71808960	exonic	NM_017907	LAMTOR1	ACCCTCGATAAAGGAAGTATATTCATCCAGTCTCCAGGATAGCTGCTTATGCCTACAGTG
ASCRP3001347	123	136	160	169	80	2004	183	334	173	2978.5	5246.5	3233	hsa_circRNA_102059	hsa_circ_0043428	circBase	chr17	-	37579579	37584043	exonic	NM_004774	MED1	ACCCTGACCCCATACCTTTGAATCACAACATGAGATTTTATGCTGTCATTTAATGAACCT
ASCRP3001348	25	20	21	28	29	38	37	39	30.5	65	59.5	63	hsa_circRNA_103074	hsa_circ_0060627	circBase	chr20	+	46252654	46256767	exonic	NM_006534	NCOA3	ACCCTGAGAGCTTTATTACCAGACATGATCTTTCAGTCTTACCTGCAGTGGTGAAAAACG
ASCRP3001349	23	26	23	23	21	37.5	30	21	23.5	58	61.5	59	hsa_circRNA_001157	hsa_circ_0001391	circBase	chr4	+	2826686	2826823	intronic	ENST00000356331	SH3BP2	ACCCTGGTGGCACCGTGCCCCTGTGGGCTGAGGGGAGCCACACAGCCATGTTGTATCCAG
ASCRP3001350	16	21	20	20.5	21	32	27	19	20	89	131.5	97	hsa_circRNA_005752	hsa_circ_0005752	circBase	chr9	-	113771427	113773970	intronic	uc011lwn.2	LPAR1	ACCCTGTTTACATCTTCTTAAAAGTTGTGTCATCCTTGAAGGATAGAATAAATCAGCTGT
ASCRP3001351	18	22	19	24	21	33	27	27	24	67	58	62.5	hsa_circRNA_069586	hsa_circ_0069586	circBase	chr4	+	41945763	41951402	exonic	NM_018126	TMEM33	ACCCTTCGATATTCGTCTCGAAGAAACCCATATTGTCGTGAGTATCTTCCCAGTCTTGTT
ASCRP3001352	21	22	20	23	24.5	46	28	37	20	73	69.5	69	hsa_circRNA_001807	hsa_circ_0001807	circBase	chr8	-	68163533	68172161	exonic	NM_006421	ARFGEF1	ACCCTTTACAAGTGCAACACATTTGGAGCATGTGAGGCCCATGTTTAAGATTTAATAAGA
ASCRP3001354	41	31.5	26.5	42	21	4434	192	560	393	7975	20391	13573	hsa_circRNA_101520	hsa_circ_0035226	circBase	chr15	-	50875285	50878685	exonic	NM_017672	TRPM7	ACCGAAGACACTCATGAAGTAGATTCCAAAGCAGCTTTAATACCGAATAACAATACTTCT
ASCRP3001355	23	22	23	32	39.5	38.5	32	32	27.5	83	71	62.5	hsa_circRNA_400289		25242744	chr1	+	100459092	100480976	exonic	NM_012243	SLC35A3	ACCGACTGACCTGGATAGTAGTTGTTCTTCAGGCAAATGAAGATAAAACAATGTTCGCCA
ASCRP3001356	29	23	23.5	25	25	41	31	24	26	68.5	57	50	hsa_circRNA_100060	hsa_circ_0010023	circBase	chr1	-	12638745	12639440	exonic	NM_004753	DHRS3	ACCGAGATGTTCCAGGGCATGAGAGTCAGGTGGGTGACATCACCATCCTGGTGAACAATG
ASCRP3001360	24	31	25	23.5	20	45	77.5	49	65	121	143	94.5	hsa_circRNA_100880	hsa_circ_0003557	circBase	chr11	-	72420914	72422544	exonic	NM_015242	ARAP1	ACCGCATCTTCAGATCTTACATCTATCAGAAACGATGGGTGAGACTGGATACTGATCACC
ASCRP3001361	42	32	29	41.5	44	161.5	48	67	79	1074	1072	897	hsa_circRNA_104175	hsa_circ_0005954	circBase	chr6	+	111208707	111211559	exonic	NM_001634	AMD1	ACCGGAATTTCCAGGAAGAAATAGAGTTTCTTAATGCAATTTTCCCAAATCTGAGTGGGA
ASCRP3001363	51	54	47	47	38	66	53	50	61	112	96	90	hsa_circRNA_401999		25242744	chr19	-	430683	440932	exonic	NM_012435	SHC2	ACCGGTACAGTACATGGGCTGCATCGAGGTTCTCCGCTCTATGCGCTCCCTGGACTTTAA
ASCRP3001364	33	23	20	32	24	99	207.5	1335	781	425	721.5	527.5	hsa_circRNA_100705	hsa_circ_0008898	circBase	chr10	-	126097110	126100769	exonic	NM_000274	OAT	ACCGTGAAGGGCATTCAGAAATACAAAGCAAAGATTGTTTTTGCAGATCTGTGGTTTTTC
ASCRP3001365	87	76	54	71	75.5	93	95	83	91	129	117	107	hsa_circRNA_018818	hsa_circ_0018818	circBase	chr10	-	75264607	75265184	exonic	NM_152586	USP54	ACCGTTGTCTCAGAGAGGGAGGAAGCTCCGGTTTCTTCCCACAGTTTTGCTCTGCAGATG
ASCRP3001367	20.5	23	21	25	22	72	40	42.5	39	166	508.5	334.5	hsa_circRNA_008147	hsa_circ_0008147	circBase	chr8	+	129021835	129032965	intronic	ENST00000512617	PVT1	ACCTAAGGAGCACTGAGGCCAACAGAGATTTTGAGAAACACATTGAAGGATCTGTTAACA
ASCRP3001370	28	27	26	40	41	43	34	26	26	92	78	66	hsa_circRNA_405867		25070500	chr2	-	44169153	44169936	intronic	ENST00000260665	LRPPRC	ACCTAGAGCATCCTCTGTGCTTCTGATTATATCCTGAACTGAATTTGACTGAAACGCAGA
ASCRP3001372	24	20	20	28	27	131	40	105	54.5	280.5	511	395	hsa_circRNA_102523	hsa_circ_0004956	circBase	chr19	+	34922765	34929671	exonic	NM_005499	UBA2	ACCTATACATTGCATCGTTTGGGCAAAGTACTTGTTCAAGTTGCCAAGGAAAGTGTACTG
ASCRP3001374	29	30	35.5	44	39	263	39	43	39	566	666	462	hsa_circRNA_102130	hsa_circ_0005652	circBase	chr17	+	53016284	53024673	exonic	NM_005486	TOM1L1	ACCTCACCTCAAGCCACGCATATGATAATATTTCAGCCTTCCAAGTTCTGATGTAACAAA
ASCRP3001375	21	20	20	20	18	68	41	73	39	152	197	152	hsa_circRNA_100506	hsa_circ_0017264	circBase	chr1	-	244579282	244587689	exonic	NM_001126	ADSS	ACCTCATATCCCAGTATTTGATTTTCATCAAGCAGCTGATGGTATCCAGGAACAACAGAG
ASCRP3001376	63	70	72.5	66	57	450.5	88	274.5	206	512	722	507	hsa_circRNA_104922	hsa_circ_0003270	circBase	chr9	+	128099296	128099870	exonic	NM_015635	GAPVD1	ACCTCATTCATCATCTTCATCCCCGAGTAAGGACTCCTCAAGAGGAGAGGTGCCCACCAG
ASCRP3001377	617.5	872	879	3174	1502	5304.5	939	4067.5	520	4599	4606	4326	hsa_circRNA_104572	hsa_circ_0007618	circBase	chr8	+	25265498	25266456	exonic	NM_024940	DOCK5	ACCTCCACTCACTCCCAAAGCCACCAGGACCCTAACTCAATCTTGGAGCCACTTTTGGAG
ASCRP3001378	28	24	26.5	41	43	168	36.5	68.5	31	256.5	232	202	hsa_circRNA_402338		25242744	chr2	-	112588862	112596089	exonic	NM_022662	ANAPC1	ACCTCCCTGGAATCTGTGAAAGAAGCAGACTTGTAGTCTTGTTTGACTTTGAAGGATCAC
ASCRP3001379	31	23	20	30	32	54	128	1065	294	111	157.5	136	hsa_circRNA_092554	hsa_circ_0001551	circBase	chr5	+	167915606	167924353	exonic	NM_002887	RARS	ACCTCCTATTGGGGATCTTCAGGTCTTTTATAAGGAAGAAGAGATTAAATCTCTGACTGC
ASCRP3001380	22	21	19	22.5	22	87.5	52	112	68.5	439	480	303.5	hsa_circRNA_104658	hsa_circ_0004592	circBase	chr8	-	99718694	99719539	exonic	NM_006281	STK3	ACCTCCTTATGCTGATATACATCCAATGAGGTTAATAGAAGATGAAATTGCAACCATTCT
ASCRP3001381	31	27	26.5	31.5	39	123.5	39	60	81	290.5	384	305	hsa_circRNA_005882	hsa_circ_0005882	circBase	chr2	-	168920009	168986268	exonic	NM_013233	STK39	ACCTCGTTTTGAGATTAAGGCCCACAGCAGCAGAACTTTTAAAATGCAAATTCTTCCAGA
ASCRP3001382	20	23	23	26	22	72	32.5	35	27	169.5	270	191	hsa_circRNA_104146	hsa_circ_0002041	circBase	chr6	-	82920530	82922510	exonic	NM_015525	IBTK	ACCTCTATACTGATGAAGCTGTGGTGATAAAAGGTTAGATGGAGTCAGATTTGAAAATGA
ASCRP3001383	19	21	20	21	24	31	30.5	30	24	70.5	89.5	76	hsa_circRNA_008279	hsa_circ_0008279	circBase	chr11	+	28249541	28252532	intronic	ENST00000303459	METTL15	ACCTCTATGAGATCAGGTGAAACTGAAGTTAATATTGTGACACTAAATTTTGTAAGACCC
ASCRP3001384	23	24	22	27.5	26	176.5	59	191	110	405.5	579	438	hsa_circRNA_103643	hsa_circ_0005912	circBase	chr4	+	54265896	54294350	exonic	NM_030917	FIP1L1	ACCTCTGATTCCACCACCGGGTACAGCAGGGAAGAACTGGAAACTCAGAGAAAGAAACTG
ASCRP3001385	23	24	22	25	27	83	37.5	51.5	61	190	256	197	hsa_circRNA_103318	hsa_circ_0007147	circBase	chr3	-	33453072	33467233	exonic	NM_014517	UBP1	ACCTCTGCTTTCATTCAGTGATGTCTTGGCATTGCCCATTTTCAAGCAGGAAGATTCCAG
ASCRP3001386	27	24	24	30	31	49	29	21	22	75.5	69	58.5	hsa_circRNA_025285	hsa_circ_0025285	circBase	chr12	+	7025834	7032859	exonic	NM_001975	ENO2	ACCTCTGTGGCATTGAAATGAGCACCTCCATTAAAGTCTGAATCAGTGCGTGTCCTGAAG
ASCRP3001387	23	24	21	22	19	808	55	211	121	2743.5	5787.5	3676	hsa_circRNA_006337	hsa_circ_0006337	circBase	chr1	+	193172924	193181607	exonic	NM_024529	CDC73	ACCTCTTTAATAACCATGCTTAATGCAAAAGACCTTCTACAGGACCTGAAGAGGGTGCAT
ASCRP3001389	18	22	18	18	22	60	28	38	28	155	230	176	hsa_circRNA_100584	hsa_circ_0018187	circBase	chr10	-	35321362	35322201	exonic	NM_003591	CUL2	ACCTGAACTGATGCCAACACTATTTGTGGAGTCAGTTTTGGAAGTGCATGGTAAATTTGT
ASCRP3001390	28.5	22	19	30	25	143	36	41	47	250	504.5	338.5	hsa_circRNA_009160	hsa_circ_0009160	circBase	chr14	-	58877560	58890813	exonic	NM_012460	TIMM9	ACCTGAAGAGGTAAGAATCAGGCCTTATTGGAGACATTCAAGCAAAGGTTGGACAACTAC
ASCRP3001391	37	43	39	46	126.5	70	44	35	36	109	109	93	hsa_circRNA_101695	hsa_circ_0007146	circBase	chr16	-	5077135	5078186	exonic	NM_016256	NAGPA	ACCTGAAGCCACCCTGAGGGCGGGAGAACTCTCCTTTTTCACCAGCCAGGACAACATGTG
ASCRP3001392	28	23	21	29	26	82	52	116	69	156.5	309.5	146	hsa_circRNA_103959	hsa_circ_0003205	circBase	chr5	+	138145726	138147991	exonic	NM_001903	CTNNA1	ACCTGAAGTGGATAAGCTGAACATTATGGCAGCCAAAAGACAACAGGTGATTTGATGAAG
ASCRP3001393	28	34.5	30	24	27.5	36.5	41	41	43	66	54	52.5	hsa_circRNA_405912		25070500	chr2	+	73477044	73477365	intronic	ENST00000258091	CCT7	ACCTGAGTGAAGAATGTAAGAGCAGCTGCTGAGTGTTGGGGGGGCTGGCAGTGAGCCGTG
ASCRP3001394	42	32	32	44	42	84	118	180.5	57	125	146	114	hsa_circRNA_053294	hsa_circ_0053294	circBase	chr2	+	27820936	27830906	exonic	NM_001271286	ZNF512	ACCTGATGATCGAAAGCAGGACCCAGTGCTCCATAAAGGATAATAGTTTCCAGTACACTA
ASCRP3001395	55	29	29	122.5	60	344.5	273	707	480.5	1832	2511	1925	hsa_circRNA_007135	hsa_circ_0007135	circBase	chr7	-	6840578	6841154	exonic	NM_198097	CCZ1B	ACCTGATTGAAGTAAATGGTCTGAGAAAGAACCCCAGTTTAAGTTTATCTACTTCAACCA
ASCRP3001396	21	24	21.5	19.5	20	30.5	36	24	37	62	53	48	hsa_circRNA_402675		25242744	chr21	+	45745035	45745147	exonic	NM_002626	PFKL	ACCTGCAGCAGGAACGAGAAGTGCCATGACTACTACACCACGGAGTTCCTGTACAACCTG
ASCRP3001397	77.5	74	89	116	97	807	88	86	73	938	1211.5	904	hsa_circRNA_009031	hsa_circ_0009031	circBase	chr4	+	4650703	4651269	exonic	NR_037888	STX18-AS1	ACCTGCCCCTAGATCTTCTATTTCTGATCATCTTCTATGCAAGGATGCAGAGATTCAGAG
ASCRP3001398	24	28	27	23	22	31.5	49	142	53	68	76	72	hsa_circRNA_000261	hsa_circ_0000261	circBase	chr10	+	112723882	112724819	exonic	NM_007373	SHOC2	ACCTGCTGAAATTGGAACTCTAATGAATCATTGATTGACCAGCACTATTTTACCAGTTGG
ASCRP3001399	24	23	23	21.5	22	49.5	28	26	23	77	70.5	67	hsa_circRNA_022356	hsa_circ_0022356	circBase	chr11	-	61556601	61557393	exonic	NM_014206	TMEM258	ACCTGCTGCTCATAATAAATGCAGATGTATAGCATTACGAGGTCACCTCTACCAAGTACA
ASCRP3001400	25	38.5	45	51	50	40	47	110.5	48	121	119.5	101	hsa_circRNA_014551	hsa_circ_0014551	circBase	chr1	-	155313104	155316260	exonic	NM_018489	ASH1L	ACCTGCTGTGTGTTGGACCTTTATACGTATTGTAAAGGTATGGCAGCACTGTGATTGTAT
ASCRP3001401	31	25	21	29	32	42	38.5	26	28	91	94	86	hsa_circRNA_103157	hsa_circ_0008533	circBase	chr22	-	19178815	19187352	exonic	NM_001835	CLTCL1	ACCTGGACAGTCAGTTTCTTTTCAAAGGTGTGCTTTGCCTGCATGGATGGACAAGAGTTC
ASCRP3001403	20	22.5	21	26	23	148	41	57	64.5	527	855.5	635	hsa_circRNA_103323	hsa_circ_0064794	circBase	chr3	+	33853563	33863574	exonic	NM_013374	PDCD6IP	ACCTGGATAATGATGAAGGATTGAAAATCGCTGCTAAACATTACCAGATATTATGATCAG
ASCRP3001404	27	26.5	21	24.5	29	50	37	39	51	82	83.5	75	hsa_circRNA_100442	hsa_circ_0002274	circBase	chr1	-	211952259	211966532	exonic	NM_014873	LPGAT1	ACCTGGATCCTTGGATACAGGAAACCAACAGTCACACATGTACATTACAGTGATGGAATG
ASCRP3001405	39	29	25	52	52	114	42	28.5	32	129	137	115	hsa_circRNA_059711	hsa_circ_0059711	circBase	chr20	+	30330343	30389603	exonic	NM_012112	TPX2	ACCTGGCCTGGAATAAATACGTTTTGTCTTTCCCTCGTTCTTGATACATATTTGCCAGAC
ASCRP3001406	47	39	53	64	46	5539	290	623	546	15744	20849	9506	hsa_circRNA_405189		25070500	chr14	+	31050069	31050322	exonic	ENST00000550944	G2E3	ACCTGGTGACTCACAGAACCTTGCTAAAAAACATTCCCTTCAATTTAAAAAATGTTCCCG
ASCRP3001407	31	25	25.5	46	33	33	53	93	52	82	217	134	hsa_circRNA_101209	hsa_circ_0029403	circBase	chr12	+	129396968	129411699	exonic	uc001uhy.1	GLT1D1	ACCTGGTGATTGTGGGTCCTGAACCGCATGCTAAGGGTAAGGTCTATGTCCAGAGTCAAG
ASCRP3001408	40.5	22	23	52	54	41	32	25	31.5	75	67.5	72	hsa_circRNA_007475	hsa_circ_0007475	circBase	chr12	-	51639798	51640615	sense overlapping	NM_001031628	SMAGP	ACCTGTACAAGAACAAAGGCAGCTACGTCACCTATGAACCTACAGAAGAAGAACTGATGA
ASCRP3001409	22	20	24	23	21	34	30	23	26	84	103.5	89.5	hsa_circRNA_070689	hsa_circ_0070689	circBase	chr4	-	113527163	113545032	exonic	NM_018392	ZGRF1	ACCTGTGACCCTAAGGCAATTTTATATGATGACAAAGGAGCATGTTTGGAGAGTCTGTTT
ASCRP3001410	20	21	19	22	24	49	35	39	45	99.5	141	112.5	hsa_circRNA_100196	hsa_circ_0007693	circBase	chr1	-	44773981	44804994	exonic	NM_024066	ERI3	ACCTGTGGAGACTGGGACTTAAAAGTCATTTTTAGATGCTTCTGGATGTTCAATGCTAGC
ASCRP3001412	24	22.5	22	22	21	41.5	27.5	21.5	26	70	68	63	hsa_circRNA_401817		25242744	chr17	+	46998521	47000299	exonic	NM_023079	UBE2Z	ACCTTCAAGGCCAAACTATGCAGGAGAGACATCCAGGAGACAGCAAAAACTATAATGAAT
ASCRP3001414	26	21	20	31	30.5	45	33	23	22	67	56	58	hsa_circRNA_400080	hsa_circ_0092348	circBase	chr4	+	113568990	113569830	intronic	ENST00000324052	LARP7	ACCTTCCTGAACTAGTTCCCAAAGTAAGTCTGTGGTTTAAATTCTGTCATTGGCTTAACA
ASCRP3001415	30.5	42	41	29	28	102	59	460	73	212.5	208	133	hsa_circRNA_100683	hsa_circ_0020028	circBase	chr10	+	112723882	112745523	exonic	NM_007373	SHOC2	ACCTTGACTTGCAGCACAATGAACTGCTAGACCTCCCAGATACTATAGGAACTCTAATGA
ASCRP3001417	22.5	18.5	19	23	22	44	35	39.5	36	79	95	87	hsa_circRNA_104144	hsa_circ_0077168	circBase	chr6	+	80910650	80912929	exonic	NM_000056	BCKDHB	ACCTTGGGATGTGGACACAATTTGTAAGCGGAAGAAGTCCCTATAGAACCATACAACATC
ASCRP3001418	19	20	17.5	19	20	32	28	27	31	71.5	76	67	hsa_circRNA_104143	hsa_circ_0077164	circBase	chr6	+	80877394	80912929	exonic	NM_000056	BCKDHB	ACCTTGGGATGTGGACACAATTTGTAAGGAAAAGATAGAGTTTTTAATACCCCATTGTGT
ASCRP3001419	59	37	34	105	92	99	63	85	73.5	221	215.5	184.5	hsa_circRNA_025177	hsa_circ_0025177	circBase	chr12	+	6643656	6647536	sense overlapping	NM_002046	GAPDH	ACCTTGTCATGTACCATCAATAAAGTACCCTGTGCTCAACCAAATTGAGCCCGCAGCCTC
ASCRP3001420	28	30	32	50.5	45.5	727	46	101	39.5	412	741.5	521	hsa_circRNA_403658		25242744	chr6	+	87925620	87943245	exonic	NM_015021	ZNF292	ACCTTGTCTGTCTTTGTACATCATCACCAAATGGAAAGTTAATCGAAGAGACACTCCTAG
ASCRP3001421	260	414	290	230	176	1696	521	739.5	272.5	1597.5	1960	1366	hsa_circRNA_001100	hsa_circ_0000877	circBase	chr19	+	4445536	4447603	sense overlapping	NR_039901	MIR4746	ACCTTGTTCTGCAGCTTGATCTTCCGGTACTTCTCCTCCTCGGGGTGCAGGATGGAGTCC
ASCRP3001422	27	22	22	42	37.5	86	51	257	71	198.5	350	234	hsa_circRNA_100772	hsa_circ_0021535	circBase	chr11	-	28080472	28113060	exonic	NM_031217	KIF18A	ACCTTTCCACAACTTGGACCAGTTCAGCCTATTCCTTGTTGTATATAATGAACAGATTCG
ASCRP3001424	32.5	25	23	32	26	80	34	30	27	168.5	167	140.5	hsa_circRNA_002210	hsa_circ_0002210	circBase	chr8	-	102211422	102213971	exonic	ENST00000518336	ZNF706	ACCTTTGACTCTTCTACTGTCTCAGACCTTAGATATGGCTCGTGGACAGCAGAAAATTCA
ASCRP3001426	27	29	26	51	33	699	274	864	573	2340	3117	1893	hsa_circRNA_104037	hsa_circ_0008836	circBase	chr5	+	179976930	179980471	exonic	NM_001303241	CNOT6	ACCTTTTGAGCTGGGAAAACTGTTTCAGTTGCAGACTTTAGGCCTGAAAGGAAAAGTAAG
ASCRP3001427	21.5	21	19	25	21.5	111	79	456	203	620	960	709	hsa_circRNA_104851	hsa_circ_0008812	circBase	chr9	+	110062421	110074018	exonic	NM_002874	RAD23B	ACCTTTTTGAAGATGCAACGAGTGCACTTGGTGAAAGCACTGAAAGAGAAGATTGAATCT
ASCRP3001428	30	25	20	36	24	131.5	72	121	136	482	832.5	575	hsa_circRNA_103865	hsa_circ_0004081	circBase	chr5	-	68651475	68651780	exonic	NM_016283	AK6	ACGAAAGACTTGAAACAAGAGCAATTGTATGATGGCTATGATGAAGAGTATGACTGTCCC
ASCRP3001429	43.5	117	203.5	44	35	35.5	106	235	172	87.5	94.5	87	hsa_circRNA_406225		25070500	chr3	-	11849306	11858811	exonic	NR_104314	TAMM41	ACGAAAGGCATTTTTACTGCTGGTGACTTTCGGATGGTGGTTGGAGAAGATAAAACAAAA
ASCRP3001430	33	24.5	22	45	36	34	40	40.5	42	64.5	67	64	hsa_circRNA_101886	hsa_circ_0000720	circBase	chr16	+	81929411	81939112	exonic	NM_002661	PLCG2	ACGAACACAAGCAACAGGGGGAGCTGTACATGTGGGATTCCATTGACCAGTGGACTGCTG
ASCRP3001432	24	25	25	30	29	49	34	27	24	92	79.5	79	hsa_circRNA_406800		25070500	chr6	-	77921697	77983024	intergenic			ACGAAGATTGAGCCCAGCATCTTGCTATTAAGGAAAAGTATGAGCCTTGCAAGAAGACAT
ASCRP3001433	25	19	17.5	26	28	36	27	20	28	70.5	79	76.5	hsa_circRNA_402518		25242744	chr20	+	2636240	2637195	exonic	NM_006392	NOP56	ACGAATCGATTGCTTCTCTGGCATGGACATATCTGCCATTGACTTGATAAACATCGAGAG
ASCRP3001434	23	21	19	23	27	258	36	47	35	670	1034	665	hsa_circRNA_405022		25070500	chr12	-	68696399	68697693	sense overlapping	NM_017440	MDM1	ACGAATTCAGGGCTCTCTTAGAGATCCAGAGTTTCAGCACAATGGACAGTGATACATAGT
ASCRP3001435	25	28	24	20	22	40.5	54	129	76	121	147	129	hsa_circRNA_078367	hsa_circ_0078367	circBase	chr6	+	155095122	155131342	exonic	NM_014892	SCAF8	ACGACAGAAAAAGGGATTACCTCCAATTAGATCTAAAACACTAAGTGTTGTATTCCCTGA
ASCRP3001436	25	23	23	28.5	25	41	34	97	64.5	81	86.5	77.5	hsa_circRNA_003137	hsa_circ_0003137	circBase	chr3	+	41265511	41267352	exonic	NM_001904	CTNNB1	ACGACAGACTGCCTTCAAATTTTAGCTTATGGCAACCAAGAAAGCAAGGGTATTTGAAGT
ASCRP3001437	26	24	21.5	29	29	171	54	223	125.5	237	337	257	hsa_circRNA_405988		25070500	chr2	-	170387096	170401345	exonic	NM_024622	FASTKD1	ACGACATTTGGAAATTCTGGGGTATCGTGTAATTCAGATCCATCCTTTTACAATCCCTGC
ASCRP3001438	38	39	36	41	47	41	42	59.5	45	72.5	59	57.5	hsa_circRNA_400983		25242744	chr12	-	65122735	65138687	exonic	NM_002076	GNS	ACGACCTAAATAAGACACAGATGGATGGGATGTCCTTATTGCCCATTTTGGAAAAGAATT
ASCRP3001439	35	27	25	41	39.5	371	123	367	304	598	907	543	hsa_circRNA_102407	hsa_circ_0008186	circBase	chr19	+	2180711	2191239	exonic	NM_032482	DOT1L	ACGACCTGTTTGTGGACTTGGGGAGCGGATAAACATCACGATGCTGCTCATGAAATCATC
ASCRP3001442	30.5	36	29	23	25	401.5	35	25	27	182	180	170	hsa_circRNA_407277		25070500	chrX	+	24094105	24094366	intronic	ENST00000253039	EIF2S3	ACGACTTCCAGTGTATTTTGAAATAGATTTAAGCAATAAACTTTCACCACCCCGCCCAGC
ASCRP3001443	34	30.5	28	28	30	61	33	25	30	85	81	80	hsa_circRNA_104281	hsa_circ_0079040	circBase	chr7	-	618892	647089	exonic	NM_002735	PRKAR1B	ACGACTTTTACATCATCACGGAGTGACATATTCGATGCCATGTTCCCTGTCACTCACATC
ASCRP3001444	34	27	28	31	36	46	36	28	32	87	87	60	hsa_circRNA_103081	hsa_circ_0002168	circBase	chr20	-	48744511	48747484	exonic	NM_199129	TMEM189	ACGAGACCTACTTCTGCATCACCACAGTTGCAGGGGCTCTCATTGCTGACTTCTTGTCTG
ASCRP3001447	35	66	80	74	53	38	96	144	70	100	85	68	hsa_circRNA_101038	hsa_circ_0025768	circBase	chr12	-	29904598	29921008	exonic	NM_175861	TMTC1	ACGAGCTGTGTGGTCCATGATGAGGCTAAACATATTTTTGACTGGTATGAACCCATTCTA
ASCRP3001449	77	51.5	46	81.5	90	145	67	67.5	75	216	452	287.5	hsa_circRNA_404904		25070500	chr11	+	71369656	71370884	intergenic			ACGAGTTTGTCATCATGTGAGAGAGAATAGGTCTGTTCTTCCCCTGGATTGTAAACTCCT
ASCRP3001450	32	24.5	22.5	34	38.5	819	95	321	236	1834	3497	2408	hsa_circRNA_100894	hsa_circ_0000343	circBase	chr11	-	77336007	77336863	exonic	NM_001293	CLNS1A	ACGATGGAGAAGAATATGATGTGGAAGCACATGAAGAATCAAAAGAACCTGTTGCTGATG
ASCRP3001451	51	33.5	26.5	44.5	30.5	432.5	251	613.5	402.5	738	1816	1279	hsa_circRNA_003264	hsa_circ_0003264	circBase	chr3	-	37170553	37190529	exonic	NM_006309	LRRFIP2	ACGCATGAGAGAACTGGAACGACAACAAAAAGAGGGCTGAAAACACAGTTAAATCACTTT
ASCRP3001452	41.5	81	121.5	49	42	56.5	64	154.5	79	119	121.5	108	hsa_circRNA_406494		25070500	chr4	-	84337883	84348873	exonic	NM_133636	HELQ	ACGCCAAGCCAAGCAAATTGTTTCATCAGCAAAGGAACTATAGATTTAGCTTATTGTGAC
ASCRP3001453	122	224	210	137.5	107	395	194.5	264.5	258	491	416.5	251.5	hsa_circRNA_101722	hsa_circ_0038111	circBase	chr16	+	16146580	16150152	exonic	NM_004996	ABCC1	ACGCCCTTTCTGAATCTGGGCCCTTCCGTCCTGGCTGGAGTGGCGGTGATGGTCCTCATG
ASCRP3001454	113.5	121	132	178	142	1504	182.5	193.5	94.5	1312	1216	1174	hsa_circRNA_100685	hsa_circ_0020080	circBase	chr10	+	116590610	116608496	exonic	NM_020940	FAM160B1	ACGCTCATAGGCAGCTTGCACCTTCTCTTCCTTTACAAGAAGATTTTGTTTATCACTGGA
ASCRP3001455	17.5	21	17	20	18	281	31.5	39	42	483	1482	1030.5	hsa_circRNA_104274	hsa_circ_0078786	circBase	chr6	-	170855190	170858201	exonic	NM_002793	PSMB1	ACGCTGACAAAGATTATTGAAGCAAGACTAAAGTACTATACTGGCAATTGCTGGAGAAGA
ASCRP3001456	40	27	22	72	78	35	43	49	43	64	58	63	hsa_circRNA_092399	hsa_circ_0000455	circBase	chr12	-	122720332	122724492	exonic	NM_022916	VPS33A	ACGGAAAACATTACGCCTCTGGATGGATGATGTTAATGAGCAACTTCTGAAGACTTTTTT
ASCRP3001457	20	22	20	25	27	60.5	30	27	23	78	84	73	hsa_circRNA_075625	hsa_circ_0075625	circBase	chr6	+	10935290	10956475	exonic	NM_001040274	SYCP2L	ACGGAAAAGAAAATATGAGGCTAAGCTTCTATCACCATCAGAGAAAGAAATACCCGAGCA
ASCRP3001458	25	25	22.5	24	22	32	29	24	23	64	62	56	hsa_circRNA_089372	hsa_circ_0089372	circBase	chr9	+	136302868	136303486	exonic	NM_139025	ADAMTS13	ACGGAAGGGCTCTTTCACAGCTGGCAGAGCGAGAGGGGATGCTCTGTGCAGACACATGTG
ASCRP3001459	137	48	44	278.5	287.5	113	130.5	118	130.5	305.5	750	413	hsa_circRNA_020354	hsa_circ_0020354	circBase	chr10	-	126799558	126799662	exonic	NM_001329	CTBP2	ACGGACAGCCCATCGTGTGAACTATAGAGTTTGTGGACAGATTTATATTGGGTTTCATCA
ASCRP3001460	27	29	29	34	26.5	90	36	28	27	136	116.5	111.5	hsa_circRNA_090181	hsa_circ_0090181	circBase	chrX	-	32715986	32717410	exonic	NM_000109	DMD	ACGGAGCCCATTTCCTTCACAGATGTTGATACCACCTATCCAGATAAGAAGTCCATCTTA
ASCRP3001461	29	37	29	22	19.5	53	48.5	28	32.5	72.5	82.5	71	hsa_circRNA_004594	hsa_circ_0004594	circBase	chr19	-	6230580	6270770	exonic	NM_005934	MLLT1	ACGGAGTTCCGGTACAAGCTCCTGCGGGCCGGCGGGTGCACCGTCCAGGTGAGGTTAGAG
ASCRP3001463	21	21	19	24	21	34	34	56	38.5	67	53	54	hsa_circRNA_007235	hsa_circ_0007235	circBase	chr5	-	137342678	137356886	exonic	NM_016603	FAM13B	ACGGCAACAAGATTAACTGCTGAAGTACTGATCGAGTTCTGCATTTCTTCAATGAGGAAC
ASCRP3001465	18	21	19	20	20	55	26	23	23.5	98	153	110	hsa_circRNA_400523		25242744	chr10	-	17401512	17432619	exonic	NM_001004470	ST8SIA6	ACGGCAAGCAGAAGAATATGCAAATTTTAGCACATATCTGAATGAGAAGTCGCTCCAACT
ASCRP3001466	22.5	22	22	22	26	36	32	64	29.5	64	77	62.5	hsa_circRNA_100463	hsa_circ_0016599	circBase	chr1	+	225140371	225156576	exonic	NM_001373	DNAH14	ACGGCAATTCAAGATATTTTCTGATTTCCGCCAGTTCCTTTATAGTTTTGTTCAGAAAAA
ASCRP3001467	19	19	21	21.5	17	36	28	25	27	58	52	53.5	hsa_circRNA_404526		25070500	chr1	+	67792417	67804386	exonic	NM_001559	IL12RB2	ACGGCACATTGACTACAGTAGACAACAGATTTCTCTTTTCTGGAAGTTGCTCCAGAACAG
ASCRP3001468	25	24	21	21.5	24	44	48	133.5	64.5	94	124	110	hsa_circRNA_100161	hsa_circ_0002043	circBase	chr1	+	35846859	35847359	exonic	NM_005095	ZMYM4	ACGGCATACAAGCAGAGACATTTTAAATCCAAAGGATGTGATCAGTGCCCAGTTTGAAAA
ASCRP3001469	19	22.5	19	23	23	54	30	29	26	150	282	215	hsa_circRNA_100514	hsa_circ_0017311	circBase	chr1	+	246784730	246797889	exonic	NM_152609	CNST	ACGGCTTACGAAAATTTGTGCAACACATCAAGAGACTTTTTTCAGGAGATATTGCACCTT
ASCRP3001470	28.5	38	36	30	28	65	151	1100	311	189	315	230	hsa_circRNA_007448	hsa_circ_0007448	circBase	chr10	-	12039670	12046726	exonic	NM_015542	UPF2	ACGGGCACTCTTCATAGTTCCTAGACAAAGAACATGGGCCTGGAATTGATATATTCACAC
ASCRP3001471	35.5	30	33	57	50.5	155	65	106.5	73	478	973.5	651.5	hsa_circRNA_102918	hsa_circ_0058275	circBase	chr2	+	219447693	219449444	exonic	NM_005444	RQCD1	ACGTCCCTTTGAGTATCTCCGGCTCACCAGCCTTGGAGTTATTGGAAATTGTAAATATTT
ASCRP3001472	160	135	124	236	245	920.5	160.5	151	181	2092	2212	1700	hsa_circRNA_038651	hsa_circ_0038651	circBase	chr16	+	24046739	24046868	exonic	NM_002738	PRKCB	ACGTCCTCATTGTCCTCGCCTGCATGATGAATGTGCACAAGCGCTGCGTGATGAATGTTC
ASCRP3001473	35	26	21	29	24	149	90	157.5	162	250.5	727	476	hsa_circRNA_003333	hsa_circ_0003333	circBase	chr15	+	94983404	95001475	exonic	NM_018349	MCTP2	ACGTCTTGGAGGAAATAGCTTCTTTTGGAGAAAGGATTAAGAAGTATTTTTGATCACTGT
ASCRP3001475	19.5	22	23.5	23	22	43	38	116	75	99	123.5	91	hsa_circRNA_002757	hsa_circ_0002757	circBase	chr18	+	21087948	21099138	exonic	NM_013326	C18orf8	ACGTGGTGGACAACCTGGTAGTCGTGCATCATCAGGATACAGAGGATTTTTGTAATTTTA
ASCRP3001476	57	77	47	74	58.5	75.5	108	81	48.5	114	129	104	hsa_circRNA_060918	hsa_circ_0060918	circBase	chr20	-	52192265	52199707	exonic	uc002xwq.4	ZNF217	ACGTTAGAAGGGTTTGGAAATCCCTTGTCTCCAGGTTGCTGGGATTGACTTCTTGCTCAA
ASCRP3001477	30	21	21	28.5	25	42.5	62.5	140.5	98	84	128	96	hsa_circRNA_006737	hsa_circ_0006737	circBase	chr4	-	2951660	2952972	exonic	NM_003703	NOP14	ACGTTCGCAGGCTGAGAGACTTCGAAGAATGCTTGGAAAGGATGAGGATGAAAATGTTAA
ASCRP3001478	22	20	19.5	19	21	176	41	210	95	339	876	595	hsa_circRNA_006589	hsa_circ_0006589	circBase	chr9	-	99122435	99130587	exonic	NM_007001	SLC35D2	ACGTTGGAAACCACATAAGTGGATTATCAAGCACAAGTAAATTAAGTTTCCCGTCACCAA
ASCRP3001479	24.5	42.5	38.5	20	19	30	60	54	56	57	47.5	49	hsa_circRNA_403898		25242744	chr7	+	105551462	105553084	exonic	uc003vdk.3	CDHR3	ACGTTTGGATCAGGAGTTAGTGATAACAGTTCTTCTTTTTGTAAAGGTGTGTCCTGAGGA
ASCRP3001481	27	28	25	27	30	38	40	57	50	68	85	72.5	hsa_circRNA_071439	hsa_circ_0071439	circBase	chr4	-	170650618	170658898	exonic	NM_017867	C4orf27	ACTAAAAACGTTTAGTTGTGACAAAGACCTTTCATGGTGCAGGCTTGGTTGTTCCAGTAG
ASCRP3001482	19	22	19	38	44	33	25	30.5	24	56.5	55.5	55.5	hsa_circRNA_006911	hsa_circ_0006911	circBase	chr2	+	48725631	48738607	exonic	NM_152994	PPP1R21	ACTAAAGATGTCCAGTAAGGTTCAACAGAGTTTGGAAAAGATTTCTAAACTGGAGCAGGA
ASCRP3001483	18	20	19	20	21	28	27.5	48	34	79	70	69	hsa_circRNA_101808	hsa_circ_0002820	circBase	chr16	+	47531309	47644831	exonic	NM_000293	PHKB	ACTAAAGGATCAACGTAACGTGAGCATGAGGTTTTCCAATCAGGCTCAGTTTATGAACCT
ASCRP3001486	24	19.5	22	29	27	258	30.5	26	23	254	443	336	hsa_circRNA_005895	hsa_circ_0005895	circBase	chr5	+	40852275	40854198	intronic	ENST00000381677	CARD6	ACTAAGACCTGCTTCTCAGCAAGGAGTCCAGATGAAGACACAAGAAAGAAAAAAGGTGTT
ASCRP3001487	37.5	25	25	72	49.5	66.5	343	1883	316.5	188	400	228.5	hsa_circRNA_085465	hsa_circ_0085465	circBase	chr8	-	124349864	124351686	exonic	NM_014109	ATAD2	ACTAAGCCTGTTGACCCTGATGAGGTGCAAGAATTGTTTATCCGTGATTATGGAGAGATT
ASCRP3001488	27	27	23	41	46	52	37	32	28	69	66	58	hsa_circRNA_065637	hsa_circ_0065637	circBase	chr3	-	49394608	49395180	exonic	NM_000581	GPX1	ACTAATAAAGTGCCGGGTGTCAGCAGAAGAGAACGCCAAGAACGAAGAGATTCTGAATTC
ASCRP3001489	22	24.5	23	22.5	24	67.5	38	101	52	120.5	164.5	120	hsa_circRNA_008786	hsa_circ_0008786	circBase	chr14	-	50120707	50122529	intronic	uc010anj.1	NEMF	ACTAATCCTTGCAGGTCCTTCTAATACATCTGTGAAGACTTCTGCAAAACTAAAACAGCT
ASCRP3001490	24	24	17.5	25	28	38	29	26	34	71	90	77.5	hsa_circRNA_006542	hsa_circ_0006542	circBase	chr12	+	107208473	107219598	exonic	NM_018157	RIC8B	ACTAATCGTAGGTCCAACTGAAGACAAAACAGAAGAGCTACACAGAAACTCTGTGAAGGC
ASCRP3001491	24	34	31	25	24	32	56	67	46	58.5	65	62	hsa_circRNA_058161	hsa_circ_0058161	circBase	chr2	+	216977738	216982517	exonic	NM_021141	XRCC5	ACTAATCGTGAGCATGGATGTGATTCAACATGAAACAATGCAGCTGTTGTGCTGTGTATG
ASCRP3001492	25	21	19	21.5	22.5	64	34.5	54.5	54	186	339	229	hsa_circRNA_075835	hsa_circ_0075835	circBase	chr6	+	24416624	24418806	exonic	NM_020662	MRS2	ACTAATGGGAGTTGCTTTTGGAATGAATTTGGAATCTTCCCTTGAAGAGTCTATCAGAGT
ASCRP3001493	34.5	24	21	39	43	87	34	21	32	160	153	146	hsa_circRNA_024892	hsa_circ_0024892	circBase	chr11	-	130749518	130749606	exonic	NM_014758	SNX19	ACTACAACAACCCCTCATCAACAGATCTCGTAGTAGAAATTCTTGGGGTGAACAAATGCC
ASCRP3001495	30.5	26	22.5	30	27	56	38.5	32	31	107	92	90.5	hsa_circRNA_404147		25242744	chr9	+	20715320	20789607	exonic	NM_017794	FOCAD	ACTACAGAATTAGCCCAAGCAGATTCCTCCCAGAAGCTGCACACATACATGTAAGAGAAG
ASCRP3001496	64	32	27	101	28	1801.5	607.5	2332	2080	4154	8348	5924	hsa_circRNA_100355	hsa_circ_0014614	circBase	chr1	+	155695172	155695810	exonic	NM_004632	DAP3	ACTACATATTCCAGATGGTGAAGACATTCAGTGAAGCTTGCCTGATGGTAAGGAAACCAG
ASCRP3001497	29	32.5	29.5	29	24	188	136	564	328.5	1311	1800	1124	hsa_circRNA_102839	hsa_circ_0005227	circBase	chr2	+	162036124	162061304	exonic	NM_004180	TANK	ACTACCAAAGACCTGTCATTTACTCCATCCTTTATAGTGATGCTACAGGACGAAGAGGAA
ASCRP3001498	47	146	121	45	34	38	167	161.5	175.5	100	70	81	hsa_circRNA_102046	hsa_circ_0043256	circBase	chr17	-	35604934	35609962	exonic	NM_198834	ACACA	ACTACGTATATGAAAGAGGAAGTGGATAGAAACATGGTGGTGGCTTTGAAGGAGCTGTCT
ASCRP3001500	36	33	30	45.5	40	348	217	1359	661	1697	3110	2150.5	hsa_circRNA_104852	hsa_circ_0006174	circBase	chr9	+	110064315	110068928	exonic	NM_002874	RAD23B	ACTAGCCCAACAGCAACTGACAGGCAAAATCCTCAATGATGATACTGCTCTCAAAGAATA
ASCRP3001501	25	27	24	30	32	124	64	285	180	330.5	461	356.5	hsa_circRNA_102644	hsa_circ_0004976	circBase	chr2	-	25990451	25994409	exonic	NM_018263	ASXL2	ACTAGGCTTGGGGAAGAAGTCATTCCAGAGATCTGAGAGACTCCATACCATATCGTCGTC
ASCRP3001503	19	21	20	18	21.5	33	25.5	29	26	63	52	52	hsa_circRNA_406027		25070500	chr2	+	203382173	203383775	sense overlapping	NM_001204	BMPR2	ACTATCCCAATGGATCTTTATGCAAGTATTTAAGTCTCCACAAAAGTGACTACAGGCGCA
ASCRP3001504	27	22	22	34	33	60	40	32	40	107.5	138	116	hsa_circRNA_012187	hsa_circ_0012187	circBase	chr1	-	45340349	45363116	exonic	NM_020365	EIF2B3	ACTATTACCAATTGCCTTCTCATGAACTCAGTCACTGTGGAGGAAGGGCATCCTAGAATA
ASCRP3001505	22.5	22	21	22	22	157.5	42	103	41	318	376.5	278	hsa_circRNA_001188	hsa_circ_0001188	circBase	chr21	+	37705943	37713844	exonic	NM_015358	MORC3	ACTATTCCCTGAGGCTTTGCCCGAAGTTTTTACATACAAATTCTACTAGTCACACCTGGC
ASCRP3001506	34	23	24	38	39	106	54	66	114.5	163.5	463	300	hsa_circRNA_102254	hsa_circ_0046522	circBase	chr17	+	80828099	80851508	exonic	NM_005993	TBCD	ACTATTTTGCCGTCGGTAACAGATCCAACTGTTTCCTGGTTATAAGTTGTCGCCGTGATC
ASCRP3001507	25	24	18	21	24	132	33	27	31	507	831	655	hsa_circRNA_101286	hsa_circ_0002473	circBase	chr13	+	96375495	96377506	exonic	NM_006260	DNAJC3	ACTCAAACAAGGAAAACTTGATGAAGCAGAAGATGATTTTAAAAAAGTGATGGTGACCCT
ASCRP3001508	48	66	84	40.5	41	97.5	67	98	68	181	309.5	204	hsa_circRNA_101486	hsa_circ_0034682	circBase	chr15	+	41535864	41555081	exonic	NM_007236	CHP1	ACTCAACAGCCGAAGCAACAAACTGCACTTTTCCCACAGTCAAATCACTCGCCTCTACAG
ASCRP3001509	47	118	131	53	43	1243	215.5	688.5	382	3567.5	4129	2869.5	hsa_circRNA_101958	hsa_circ_0041555	circBase	chr17	-	4192524	4200109	exonic	NM_003342	UBE2G1	ACTCACCTGCTAATGTTGATGCTGCGTGAAGGTGGTGTTTTTAAGGCTCATCTTACTTTC
ASCRP3001510	34.5	22	20	34	30	139.5	59.5	105	68	225	370	281.5	hsa_circRNA_005726	hsa_circ_0005726	circBase	chr20	-	49557401	49558663	exonic	NM_003859	DPM1	ACTCAGATCTTGCTGAGACCAGGAGCATCTGATTTAACAGGAAGTTTCAGGAAGCAAAAG
ASCRP3001511	23	22.5	22	20	22	37	26	28	30	57	58	60	hsa_circRNA_102703	hsa_circ_0054248	circBase	chr2	+	42522264	42531691	exonic	NM_019063	EML4	ACTCAGGCAGACAACAAATGAAGTTGTTTTGGCTGTGGAGTTTCACCCAACAGATGCAAA
ASCRP3001512	21	24	19	32	83.5	36	33	21	22	69.5	66	68	hsa_circRNA_080929	hsa_circ_0080929	circBase	chr7	-	81613950	81695840	exonic	NM_000722	CACNA2D1	ACTCAGGCCAGATCTTCACCATGGGTTGATAATAGTAGAACTCCAAATAAGATTGACCTT
ASCRP3001515	21.5	20	18	20.5	20	73	33	39.5	27	82	98	94	hsa_circRNA_100393	hsa_circ_0015264	circBase	chr1	+	172569203	172571927	exonic	NM_014283	SUCO	ACTCATGAGATCCAAGTCTCTACAGTTAACTGGCAAAGAAGGATCAGCGGCAAACTGAAG
ASCRP3001516	49	27	21	60.5	56	80.5	92	327	140	177.5	253	182	hsa_circRNA_007472	hsa_circ_0007472	circBase	chr10	-	94428283	94428763	sense overlapping	ENST00000428356	EIF2S2P3	ACTCATTGCCTACTTTAACACCTGTCAGAGAAACATGATATGAGTGGTTCTATAGATGGT
ASCRP3001517	49	28	26	67	76	58	88	390	172	178.5	264.5	196	hsa_circRNA_003742	hsa_circ_0003742	circBase	chr2	+	171609036	171609516	sense overlapping	ENST00000461070	EIF2S2P4	ACTCATTGCCTACTTTAACACCTGTCAGAGAAACGTGATATGGGTGGTTCTATAGATGGT
ASCRP3001518	25	27.5	24	23	33.5	70	31	29	32	108.5	105	77	hsa_circRNA_103360	hsa_circ_0001295	circBase	chr3	-	47716964	47727660	exonic	NM_003074	SMARCC1	ACTCCAAGAAAACATTAGCAAAGGAAGATGAAGATCCTGCCAAAGGTGATCAGAGTCGAT
ASCRP3001520	30	30	33	31	28	130	42	55	41.5	227	347.5	204	hsa_circRNA_011712	hsa_circ_0011712	circBase	chr1	+	38166107	38169019	exonic	NM_018101	CDCA8	ACTCCAGGCCTGACACCCAGGTTTGACTCAAGCACGAAAGGTAATACAGGTAGATGAAAT
ASCRP3001521	24	21	23.5	22.5	23.5	57.5	28	27	20.5	93	70	72	hsa_circRNA_001543	hsa_circ_0001720	circBase	chr7	+	77378740	77387395	sense overlapping	NM_198467	RSBN1L	ACTCCATCTCAAAAAAAAAGAAAGAAATTCATGATAATGCTATCCTCTAGGTGGGAAGGA
ASCRP3001522	30	27	25	29	26.5	49	80	49	95	121	125	96	hsa_circRNA_100712	hsa_circ_0005734	circBase	chr10	-	126395204	126395456	exonic	NM_014661	FAM53B	ACTCCATTGCATGTGGGACCTTCAGCCGTGAACTGGGAGTTGACCACATTTGGCCATTTC
ASCRP3001523	31	26	25.5	33	30	93.5	66	154	119	407.5	497.5	402	hsa_circRNA_103415	hsa_circ_0008234	circBase	chr3	-	71090478	71102924	exonic	NM_032682	FOXP1	ACTCCCAAAAGGGAAAGGTTCCCGTGTCAGTGGCTATGATGACACCTCAAGTTATCACTC
ASCRP3001524	86	142	125	284	173	511.5	169.5	779	83	703	549	469	hsa_circRNA_090446	hsa_circ_0090446	circBase	chrX	+	47441689	47446190	exonic	NM_003254	TIMP1	ACTCCCATCTTTCTTCCGGACAATGAAATAAAGAGTTACCACCCAGCAGATTTCGTCGGC
ASCRP3001525	25	31	26	30	33	176.5	43	90	48	407.5	433.5	341	hsa_circRNA_068697	hsa_circ_0068697	circBase	chr3	-	196846280	196869639	exonic	NM_004087	DLG1	ACTCCCCAGTTTCTAAAGCAGTACTTGGAGATGATGAAATTACAAGGTTAATGGCACAGA
ASCRP3001526	453	2680	2367	3091	290	5514	3986	8228	341.5	5599	5084.5	3822	hsa_circRNA_405036		25070500	chr12	-	89853414	89866052	exonic	NM_172240	POC1B	ACTCCCCCTGTTATGGATATCCTTTCTTTTGATTCTACCACAATTTTCACCCGATGGAAG
ASCRP3001527	94.5	47	34	78	43	613	188	384	609	697.5	1625	1087	hsa_circRNA_060342	hsa_circ_0060342	circBase	chr20	+	37159809	37161502	exonic	NM_020336	RALGAPB	ACTCCCGATAGTGAGAGACCTGCTCAAGCTCTCTTAAGAGATTATGGGGCAATGTTAAAT
ASCRP3001528	19	20	19	20	21	46	27	25	21	98	94	88	hsa_circRNA_054190	hsa_circ_0054190	circBase	chr2	-	39499423	39507497	exonic	NM_003618	MAP4K3	ACTCCCTGACAGAATACTGCCAAGATGGGTGCATGTTTTTCAAAAGTTTTTAATGGGTGT
ASCRP3001529	34.5	26	23	38	50	2633	226	544	246	3523	8123	5377	hsa_circRNA_406926		25070500	chr7	-	27934838	28031600	exonic	NM_175061	JAZF1	ACTCCGACAGATACAGATCCACGGGTTTTAGAAAAACAAGAATTACAGCAGCCAACCTAT
ASCRP3001530	23	23	19.5	21	20	44	28.5	22.5	23	128.5	144	120	hsa_circRNA_404557		25070500	chr1	-	108226107	108247683	sense overlapping	NM_006113	VAV3	ACTCCTAAACAGGTGGATCCAGGTGTCTAACATAAGACCAGACTATGCAGACTCCAATTT
ASCRP3001531	23.5	20	20	20	23	44	28.5	19	21	66.5	67	65.5	hsa_circRNA_406290		25070500	chr3	+	61880230	61880810	intronic	ENST00000295874	PTPRG	ACTCCTCAGCAGGAAGAAGACAGCAGTAAATTATAAACAGCTCTTAGGGTGAAGAACAGT
ASCRP3001532	20	22	18	22	28	46.5	28	23	18	77.5	75.5	75.5	hsa_circRNA_401021		25242744	chr12	+	101727078	101728282	exonic	NM_014503	UTP20	ACTCCTCTGCTGAAACTGATCAGTATCTGGAGCAGAAACGCAAGATACAGCTGAGATTTA
ASCRP3001533	19	21	19	23	26	41.5	28	24	26.5	113	117	109	hsa_circRNA_103900	hsa_circ_0002186	circBase	chr5	+	77711343	77717784	exonic	NM_004866	SCAMP1	ACTCCTTGTTCATTTGTCTGTTGGTACAGACCACTTTATGGAGCTTTCAGCCTCCACCAG
ASCRP3001534	27	25	23	29	34	75	52	254	141	125	134	111	hsa_circRNA_030254	hsa_circ_0030254	circBase	chr13	+	50025688	50042096	exonic	NM_031915	SETDB2	ACTCCTTTCCAGAAGACTGTACATTTCTAATGTTTCATCCATTTGTGGACCAAAAGATGG
ASCRP3001535	181	187	166	870	956	1779	215.5	162.5	126.5	3112.5	1984	1493	hsa_circRNA_001233	hsa_circ_0000463	circBase	chr12	-	132609079	132609271	antisense	NR_003290	EP400NL	ACTCCTTTCCCTGTGCTTTCCGATACTCACCACCAGGACTGTGACTTCCTGAATGCACTG
ASCRP3001536	28	32.5	28	28	29.5	42	42	38	32	74	72	61.5	hsa_circRNA_081393	hsa_circ_0081393	circBase	chr7	-	99690403	99693093	exonic	uc003usv.1	MCM7	ACTCCTTTTGCTAATAAAAGTGTTTGTAGATTGTCGTTGGCCCAGCACATCACCTATGTG
ASCRP3001537	64	47.5	43	61	63	97	70	63	69.5	118	133	112	hsa_circRNA_405032		25070500	chr12	+	85459039	85460676	exonic	NM_001079910	LRRIQ1	ACTCGAATTGGTTACAACAGTTACATTTCAAGATTTGCCAGGCTGTGTTCTCTCCACACT
ASCRP3001538	34.5	31	33	44	40	70.5	35	29	33	140	117	111	hsa_circRNA_103104	hsa_circ_0002805	circBase	chr20	-	62407030	62422143	exonic	NM_025224	ZBTB46	ACTCGCTGTCCCAGTCTGTAGAAGAGGCGACACCAGGGCTTCCAAATGAACAACCGAAAG
ASCRP3001539	296.5	368	428.5	4162.5	539	962.5	4443	40570	1189	1319	3153	2119	hsa_circRNA_404833		25070500	chr11	-	3726429	3733958	exonic	NM_016320	NUP98	ACTCGTTCACTAGGTCTCCCATTTTTCTAAGTATGGCCTTCAGGATTCTGATGAAGAGGA
ASCRP3001540	35	32.5	27	45	28	2676.5	246	3202.5	1123	8698	17925	11951	hsa_circRNA_104810	hsa_circ_0005142	circBase	chr9	-	86297865	86301070	exonic	NM_013438	UBQLN1	ACTCTACATCTGGTTCTGCTACTAGCAACCCTTTTGGTTTAGTTTAAGGAAGAAATCTCT
ASCRP3001541	35	37	33	61	56.5	52	42.5	51	61	87	72.5	72	hsa_circRNA_104471	hsa_circ_0082142	circBase	chr7	+	127447537	127569382	exonic	NM_014390	SND1	ACTCTATTTGCCAAAGGAAACTTGCCTTATCACCTTCTTGCTTGCAGGATAAGAACAAGA
ASCRP3001543	32	23	22	32	30	36	34	27	22.5	71	59.5	61.5	hsa_circRNA_066814	hsa_circ_0066814	circBase	chr3	-	113207791	113218429	exonic	NM_144718	SPICE1	ACTCTCAGTCTAACACGAATACAGACAGGTACGCCGTCATGAAATACACAAATCGAAGAA
ASCRP3001544	29	27.5	23.5	38	34	117	43	59	35	150.5	186	158.5	hsa_circRNA_101189	hsa_circ_0029033	circBase	chr12	+	122380439	122380881	exonic	NM_144668	WDR66	ACTCTCGAACTCCCCACAGAGTACGGTGTTCAGTATTCCTGTGCACACAATATTTGACAG
ASCRP3001545	66	65	53	49.5	40	3886.5	136	163	188	3492.5	6251.5	4397	hsa_circRNA_100085	hsa_circ_0005075	circBase	chr1	-	21377358	21415706	exonic	NM_001198801	EIF4G3	ACTCTCTCAAAATTCCTAGAGGACCTGTGCAACAACCTCTTGAGGATCGAATCTTCACTC
ASCRP3001546	36.5	44	34	28	23	2759.5	88	93.5	86	3332.5	5660	3585	hsa_circRNA_100086	hsa_circ_0000026	circBase	chr1	-	21377358	21437876	exonic	NM_003760	EIF4G3	ACTCTCTCAACAATCCCACAGAGTATTGATGAGGAAACTGAAGTTTGGAGCGATCACATC
ASCRP3001548	24	22	19.5	23	24	75	37	41	50	121	236	170.5	hsa_circRNA_004165	hsa_circ_0004165	circBase	chr19	+	44600495	44602041	exonic	NM_013398	ZNF224	ACTCTGCAAGTTTCCAGAAGTAAGAGGGAAAATGACCACGTTCAAGCTGAATACCACTAG
ASCRP3001550	45	133	193	71	57.5	163.5	129	387.5	107	201	248	162.5	hsa_circRNA_407148		25070500	chr9	-	5859467	5867902	intergenic			ACTCTGGAGAGTCTTTCTTGTTTTGTCTCAGGTGTGTGCCTAATAATAAGAGCAAACCCC
ASCRP3001551	19	21	20.5	18	19	37.5	27.5	31	40	75	76	72	hsa_circRNA_105019	hsa_circ_0001937	circBase	chrX	-	100296305	100297301	exonic	NM_024917	TRMT2B	ACTCTGGAGGTTGAGCTATGAAGAACAGCTCAAGGTGGATTTCAGTGTGTTCTTTGGATG
ASCRP3001553	44	41	32	37	34.5	120	55	69	60	175	200	115	hsa_circRNA_100806	hsa_circ_0007061	circBase	chr11	-	46515157	46534363	exonic	NM_017749	AMBRA1	ACTCTTCTGTTAACAGGGTCCTGGCAGGAGGCTGCTGGAATCTTCCCTCATTTCATTATC
ASCRP3001554	22	24.5	21	23	26	61	33	63	52	188	302	220	hsa_circRNA_102145	hsa_circ_0002496	circBase	chr17	-	58538023	58539422	exonic	NM_006380	APPBP2	ACTCTTCTTATGTCCACCAGTATAGCTCTGGGAAATTTGACAATGCACTGCTTGTGTAGT
ASCRP3001555	36.5	31	25	36	36	111	59	160	134	251.5	456	301.5	hsa_circRNA_401590		25242744	chr16	-	30304419	30306012	exonic	NR_002453	SMG1P5	ACTCTTCTTGGTCAGTTTCTAGAAGACATGGAAGCATATGCTGAGCTTGTAATGACCAGC
ASCRP3001557	28	26.5	22	31	23.5	947	116	805	507	3922	7895	5439	hsa_circRNA_001440	hsa_circ_0001440	circBase	chr4	-	129913321	129960251	exonic	NM_144643	SCLT1	ACTGAACAAAGTGTGATAATCGAACAACTCCGAAAAAAACTTAGAAACAGGTGGGTGAGA
ASCRP3001560	28	21	20	32	28	32	30	63	29.5	64	52	60.5	hsa_circRNA_061570	hsa_circ_0061570	circBase	chr21	+	35229039	35239635	exonic	NM_003024	ITSN1	ACTGAAGCCTATGCAACGGGTAACAAGATACCCACTGATCATTAAAAATGGTGTTCAGAC
ASCRP3001561	20.5	20.5	19	21	22	51	47	116	43.5	77	110.5	94.5	hsa_circRNA_000498	hsa_circ_0000498	circBase	chr13	-	79209244	79219132	exonic	NM_024546	RNF219	ACTGAAGGCTGAAGTTGATAACAGATCACCTCAAAAGTACGTCAGCCTGTCATATGCATC
ASCRP3001562	44	37	23	20	19	55	91	249	150	192	333	215	hsa_circRNA_102143	hsa_circ_0044949	circBase	chr17	-	58342772	58372162	exonic	NM_032582	USP32	ACTGAATGCACATGACACCACAAAGACATTTTTAGTCTTTTTTCAAGTGAATCTGGGAAC
ASCRP3001563	35	24	21	62	53	182.5	75.5	203	122.5	395	931.5	604	hsa_circRNA_007335	hsa_circ_0007335	circBase	chr10	+	76978820	76979114	exonic	NM_003375	VDAC2	ACTGACATTTGATACTACCTTCTCACCAAACACAGGGAATTTTCAACGTCCGGTTCATCT
ASCRP3001564	23	22	17	22	26	37	37	122	54	101.5	96	80	hsa_circRNA_400537		25242744	chr10	+	27447477	27450111	exonic	NM_032844	MASTL	ACTGACGGATTTTGGCCTTTCAAAAGTTACTTTGAATAGAGGTTGTTAAAAAAGCAGACA
ASCRP3001565	31	24	24.5	29	37	51	62.5	66	79	157	167.5	161	hsa_circRNA_071106	hsa_circ_0071106	circBase	chr4	+	148778703	148803083	exonic	NM_024605	ARHGAP10	ACTGACTCCATTGACAGAAGGTTTTGTTTTGACATAGAAGCTGCTGATCGGAAGAAAAAA
ASCRP3001566	23.5	20	22	27	28	51	33	105.5	72	121.5	157	119	hsa_circRNA_101459	hsa_circ_0034049	circBase	chr15	+	22835915	22846952	exonic	NM_052903	TUBGCP5	ACTGAGACTCAGGTTATTCGGGAAACCCTATGATTTCATCGTTTCTTGGATGTCAACAGC
ASCRP3001568	24	20	20	27	33	42	28	21	21	71	86.5	71	hsa_circRNA_403817		25242744	chr7	+	56123316	56124107	exonic	NM_001762	CCT6A	ACTGATACAAGGGCCTTCATCCTAGAATAATCACTGAAGGATTTGAAGCTGCAAAGGAAA
ASCRP3001569	24	23	19	34	35.5	38	42	116	73	158	213.5	184.5	hsa_circRNA_405886		25070500	chr2	+	61014081	61014755	exonic	NM_022894	PAPOLG	ACTGATACAGGGTTGGATTAGTAGAATCTAAAATCCGTGTACTTGTTGGAAACTTGGAAC
ASCRP3001571	24	21	19	26	22	39	29	41	21.5	107.5	85	76	hsa_circRNA_077228	hsa_circ_0077228	circBase	chr6	-	84922674	84925640	exonic	NM_014895	CEP162	ACTGATGACGAACATGAGAATGAATCGAAACATGAAGAACTGGCAGGACTTCTTGGAACA
ASCRP3001572	27	25	19	27	26.5	37	35.5	48	28	67	68	56	hsa_circRNA_104047	hsa_circ_0075487	circBase	chr6	+	3006701	3012908	exonic	NM_000904	NQO2	ACTGATGAGCAGAAAAAGGTTCGGGAGGCTGACCTAGTGATATTTCAGATTGCTGGACTC
ASCRP3001573	28	26	23	33	31	49	44.5	47	49	145	231.5	186	hsa_circRNA_004506	hsa_circ_0004506	circBase	chr15	-	65266939	65273363	exonic	NM_016630	SPG21	ACTGCAAACAGATTATTGTGGATGATGATGACAGTAAGATATGGTCGCTCTATGACGCGG
ASCRP3001575	21	23	17	24	22	38.5	30	33	45.5	97	135.5	106	hsa_circRNA_102650	hsa_circ_0004269	circBase	chr2	+	26587169	26598016	exonic	NM_033505	EPT1	ACTGCAATGATTATTGTACAGTGCTGTGGATACCAATCCACTTTCTCTGTATGTCATGCA
ASCRP3001576	22	20.5	21	23	20	43	65	125	119	99	125	94.5	hsa_circRNA_104742	hsa_circ_0086483	circBase	chr9	+	19423859	19435082	exonic	NM_001010887	ACER2	ACTGCACTGCTCATCGCAGAGCTAAAGAGATCAGCAATGTCTTATTTTTCATTTTACCGC
ASCRP3001577	25	23	22	28	28	44	30	30	28	74	77	64.5	hsa_circRNA_405082		25070500	chr12	+	122337539	122341013	exonic	NM_002813	PSMD9	ACTGCATAACATTGGCAGTGTGGTGCAGCACAGTGAGGGGGCCTGCAGAATGATCACAAG
ASCRP3001578	21.5	20	20	21	18	61	36	88	60	213	340	245	hsa_circRNA_103319	hsa_circ_0064742	circBase	chr3	-	33467081	33467233	exonic	NM_014517	UBP1	ACTGCATGATGAAACGCTTACTTATTTGAACCAAGTGATGTCTTGGCATTGCCCATTTTC
ASCRP3001579	27	30.5	28.5	33.5	34	50.5	62	42	32	88	73	65	hsa_circRNA_104588	hsa_circ_0005630	circBase	chr8	-	37727937	37735069	exonic	NM_025151	RAB11FIP1	ACTGCCACCATCATCAGTGAGAACTTGAACAATGAGGTCATGATGAAGGTGGTATAAGTT
ASCRP3001580	21	19	17.5	21	18.5	140	32	36	44	295	692	436.5	hsa_circRNA_102660	hsa_circ_0053422	circBase	chr2	+	32396355	32400430	exonic	NM_017964	SLC30A6	ACTGCCTATACTTACCTGACCATTTTTGATCTTTTTAGGGGACAATTCATCTCTTTCGAA
ASCRP3001581	24	22	20	28	31.5	49	26	58	34.5	112	139	120	hsa_circRNA_407187		25070500	chr9	+	72965029	72965387	exonic	NM_015110	SMC5	ACTGCCTGTAAAGAAAATACATCTCAATACTTTTTCATAACACCAAAGGAAGATTATGAT
ASCRP3001582	90	30	32	159.5	66	2037	432	488	747.5	2498.5	5881	3729	hsa_circRNA_008874	hsa_circ_0008874	circBase	chr10	+	96201652	96234540	exonic	NM_015188	TBC1D12	ACTGCCTTGATTCTTGAGGATCGACCATCAAACCTTTTTCCAAAAAGGACAAAGGAACTC
ASCRP3001583	20	19	18	18	19	37	23.5	17	18.5	108	106.5	100.5	hsa_circRNA_401211		25242744	chr14	-	20793697	20794952	exonic	NM_021178	CCNB1IP1	ACTGCGTTTTTCTTTTATGAAATGATCCTAGATAATTGATAGATCCTGTGGTTCAACTGG
ASCRP3001584	93	129	225.5	274.5	203.5	2778	101	414	61.5	2707.5	2024	1456	hsa_circRNA_100269	hsa_circ_0013048	circBase	chr1	+	82302569	82372915	exonic	NM_012302	LPHN2	ACTGCTACCTCCCCGATGCCTTCAAAATTATGACTCAAAGATATGAAGATCAATGATGCA
ASCRP3001585	29	27	25	34	30	169	142	352	187.5	493	760	519	hsa_circRNA_405966		25070500	chr2	-	136071058	136073100	exonic	NM_032143	ZRANB3	ACTGCTATTGCCAAGATATTTTGGTAAAAGACCTCAGTGGGATTGTAGAGGGGCATCAAA
ASCRP3001586	20	19	18	20	22	43	32	27	26	72	92	76.5	hsa_circRNA_001311	hsa_circ_0001311	circBase	chr3	-	53262071	53262344	sense overlapping	NM_001064	TKT	ACTGCTGAAGAAAGAAAATGCCATCATCTATAACAACAATGAGGACTTCCAGGTCGGACA
ASCRP3001587	20	20	20	19	21	37.5	26	22	24	87	88.5	72.5	hsa_circRNA_028345	hsa_circ_0028345	circBase	chr12	+	112568314	112583466	exonic	NM_006700	TRAFD1	ACTGCTGATTGACCATCAGGAAGAGCTAAAGATGGCTGAATTTCTAGATGACCAGGAAAC
ASCRP3001588	53	35	32	56	24	488	548	2524.5	1378	3150	4782	3256	hsa_circRNA_008620	hsa_circ_0008620	circBase	chr5	+	76342171	76344097	exonic	NM_018046	AGGF1	ACTGCTGTAAACCCTGCTACAATTGGAAGGATTTGAACTCAGAGGATCAAAAAGCCTTCA
ASCRP3001590	52	53	61	94	74.5	2107.5	97	69	46	1757	1724	1451	hsa_circRNA_403472		25242744	chr5	-	142675024	142680328	exonic	NM_000176	NR3C1	ACTGCTTCTCTCTTCAGCTCGAAAAACAAAGAAAAAAATAAAAGGAATTCAGCAGGCCAC
ASCRP3001591	21	20	20	37	47.5	43	40	41.5	28	71	135	102	hsa_circRNA_072780	hsa_circ_0072780	circBase	chr5	-	68590619	68607031	exonic	NM_176816	CCDC125	ACTGCTTCTTCAGCTCAAACAAGAGGAGGTAGAAATGTTAAAAACTGAACTTGAGGCATC
ASCRP3001592	33.5	21	21	25	28	52	35.5	40	39	87.5	111	95	hsa_circRNA_104370	hsa_circ_0080189	circBase	chr7	-	47520700	47568745	exonic	NM_022748	TNS3	ACTGGAACAGCCGGAAGAATTAACCTCGAGTCTGCACGCTTTTAAGAACAAGGCCTTTAA
ASCRP3001593	24.5	23	21.5	24.5	27	38	30	22	24	86	65.5	76	hsa_circRNA_400352		25242744	chr1	-	173593925	173596298	exonic	NM_198493	ANKRD45	ACTGGAAGATATTGTGACTCCTATCTTCACAAAAATGACTACACCATATGCAAGGCTGAC
ASCRP3001595	27.5	22	20	26	22	35	35	112	30	75	55	46.5	hsa_circRNA_072732	hsa_circ_0072732	circBase	chr5	+	65349233	65350779	exonic	NM_018695	ERBB2IP	ACTGGAGAGAACAAGTACTTCGACATATTGAAGCCAAAAAGTTAGAAAAGGCAAGAAGAT
ASCRP3001596	23	20	18	25	27	45	32	55	33.5	63	76	67.5	hsa_circRNA_087255	hsa_circ_0087255	circBase	chr9	+	79952170	79986065	exonic	NM_015186	VPS13A	ACTGGAGGCATCATAGACATGGCTAGCAGTACATTTCAGGGAATAAAAAGATCATTCATT
ASCRP3001597	20	21	18	19	21	35	32	34	30	66	89	67	hsa_circRNA_001146	hsa_circ_0001429	circBase	chr4	-	103610730	103612114	exonic	ENST00000514430	MANBA	ACTGGATGGAGGCTTAAATATTGAAAAATCAGCTAAGAATGAAGGATTAAACTGAAGATT
ASCRP3001598	20	20	18	16	18	45	31	60	31	78.5	101	78	hsa_circRNA_001478	hsa_circ_0001478	circBase	chr5	-	40764615	40777688	exonic	NM_006251	PRKAA1	ACTGGATTTCCGTAGTATTGATGTTGGCAAACATGAATTGACTGGGCATAAAGTAGCTGT
ASCRP3001599	29.5	26	25	39.5	45.5	145	78.5	200	165	467	1578	925	hsa_circRNA_101182	hsa_circ_0004479	circBase	chr12	-	121220457	121229360	exonic	NM_139015	SPPL3	ACTGGCCATTGGCTTCTCATGGATGGTCCCTTAATATGGACTTTGAAAATCAAGATAAGG
ASCRP3001602	26	20	19.5	23	25	36	31	21	31.5	74	94.5	88	hsa_circRNA_101068	hsa_circ_0026349	circBase	chr12	+	52385646	52385777	exonic	NM_004302	ACVR1B	ACTGGTGGCAGAGTTATGAGGAGTCCATGAAGAATATCAGCTGCCATATTACGACTTAGT
ASCRP3001603	16	20	18	17.5	18	204	26	27	27	675	1347	825	hsa_circRNA_102516	hsa_circ_0050509	circBase	chr19	+	34921480	34924317	exonic	NM_005499	UBA2	ACTGGTTATGAATGCTTTAGATAACAGAGATTGATCTGGATACTATTGATGTAAGCAACC
ASCRP3001604	24	24	24	50	25	214	104.5	784	336	413.5	1351	806	hsa_circRNA_100975	hsa_circ_0002100	circBase	chr11	+	120345268	120348235	exonic	NM_015313	ARHGEF12	ACTGGTTTGCAGAGTCCAGAATTTGGATTTAACAAAAAGGAAGATGATTCATGAAGGGCC
ASCRP3001605	35	35.5	32.5	39	22	540	220.5	1721	1146.5	946	2484	1335	hsa_circRNA_100977	hsa_circ_0002089	circBase	chr11	+	120347369	120348235	exonic	NM_015313	ARHGEF12	ACTGGTTTGCAGAGTCCAGATAACAAAGCTTTATTCGTCATTTCCATGTCAGACAATGGC
ASCRP3001606	25	21	20	23.5	22	37	30	18	23	65	68	66	hsa_circRNA_026700	hsa_circ_0026700	circBase	chr12	+	54675169	54680872	exonic	uc001sfo.3	HNRNPA1	ACTGTATTTAACTTAGTCTCCTAAAGAGCCCGAACAGCTGAGGAAGCTCTTCATTGGAGG
ASCRP3001608	22	23	20	24	25	76.5	34	64	46	167	314	209.5	hsa_circRNA_012824	hsa_circ_0012824	circBase	chr1	+	63269389	63307218	exonic	NM_032852	ATG4C	ACTGTCGAAATGTTCAGGACTTCAAACGAGCTTCTGAAGAAATCACCAAGTCAGTATAAA
ASCRP3001609	32	24	20	47	51	61	37	40	49	185	146	119.5	hsa_circRNA_004390	hsa_circ_0004390	circBase	chr1	-	85331067	85331821	exonic	NM_012152	LPAR3	ACTGTCTTAGGATGTTCACTTCTCCACAATGAATGAGTGTCACTATGACAAGCACATGGA
ASCRP3001610	37.5	29	21.5	60	55	1006	169	453	553	1809	3104.5	2047.5	hsa_circRNA_101870	hsa_circ_0040414	circBase	chr16	-	72122885	72124685	exonic	NM_017853	TXNL4B	ACTGTCTTTTTCTTCAATGGGCAGCATATGAAAGTGGATTATGGGAGTGACAGTGAGGAT
ASCRP3001613	60	61	43.5	37.5	38	698	50	37.5	46	340	340	268	hsa_circRNA_052535	hsa_circ_0052535	circBase	chr2	+	9517036	9520937	exonic	NM_003887	ASAP2	ACTGTGAGGAGCTGGAGCCGGATGAAACGGCCCTCCACCTTGCAGTCAGATCCGTGGATC
ASCRP3001614	24	18	18	21.5	21	32	32	28	37	137.5	131.5	136	hsa_circRNA_104196	hsa_circ_0005378	circBase	chr6	-	136977444	137019820	exonic	NM_005923	MAP3K5	ACTGTGGTTAGGTTTCCAATGTGCACTGGGAACTACACCTTTGTTCCTTACATGATAACT
ASCRP3001615	32	27	30	51.5	57	85	78.5	458.5	162	292	702.5	418	hsa_circRNA_104733	hsa_circ_0002359	circBase	chr9	+	6420911	6434173	exonic	NM_152896	UHRF2	ACTGTGTTGCTGCTGATGAAGACGTTATTTACCATATCCAGTATGATGATTGGAAAATGG
ASCRP3001616	22	24	24	21	22	57.5	40	108	65	122.5	107	88	hsa_circRNA_402885		25242744	chr3	-	57643406	57658165	exonic	NM_152678	DENND6A	ACTGTTCATGAGGTGGATATTTTCAGGTAATTTATCCTCAGCATTCCAAACTTACTGACA
ASCRP3001617	32	26	24	37.5	30	470	117	160	279	1953	3201.5	1881	hsa_circRNA_102175	hsa_circ_0045337	circBase	chr17	-	62864579	62865284	exonic	NM_199340	LRRC37A3	ACTGTTGAACTGGAAAAACTAATTCTCAATCACAATCCTCTGACAACTGTTGAAGATCCA
ASCRP3001618	28	29	28	27	28	57	32	26	26	83	75	74.5	hsa_circRNA_406499		25070500	chr4	-	87275682	87292020	exonic	uc003hpv.3	MAPK10	ACTGTTGAATTAGACCCGTTTCCTATAGATGAGAAACCATACAAGCTGTGAACCATAATT
ASCRP3001619	29	31	25	24	28	69	38	25	27	119	82	66	hsa_circRNA_086368	hsa_circ_0086368	circBase	chr9	-	14081841	14113080	exonic	NM_001190737	NFIB	ACTGTTTAAACAATAAAATGAGCTATGCTACAGACTCTGCCTACACAGCCTCAGGCACAT
ASCRP3001620	20	19.5	20	20	21	38	32	42	29.5	92.5	112	76	hsa_circRNA_003000	hsa_circ_0003000	circBase	chr7	-	103828698	103844682	exonic	NM_002553	ORC5	ACTGTTTGTCGAGATTTGAAAGAGCTCAGACATCTGAGACATCATTTCAGCTTTCCATCC
ASCRP3001621	27	27	22	27	24	160	144	873.5	319	413.5	716	500	hsa_circRNA_068601	hsa_circ_0068601	circBase	chr3	-	195776154	195803993	exonic	NM_003234	TFRC	ACTTAAACACTGAGTTCTTCTGTGTGGCAGTTCAGAATGATGGATCAAGCTAGATCAGCA
ASCRP3001622	42	25	24	32.5	33	35	36	27.5	28	60.5	58.5	59	hsa_circRNA_079352	hsa_circ_0079352	circBase	chr7	+	6441946	6443598	exonic	NM_006908	RAC1	ACTTAATAAATCCTTGAATCATAGTGCTGTAAAATACCTGGAGTGCTCGGCGCTCACACA
ASCRP3001623	31	25	25	23	30	41.5	99	1091	582	107	159	131	hsa_circRNA_104980	hsa_circ_0001910	circBase	chrX	+	10031484	10066619	exonic	NM_015691	WWC3	ACTTAATTGGCAATATGAAGAAGCCAGAAAGAGGATAACAAAGCCATTGACCTTTGCCGA
ASCRP3001624	72.5	57.5	56	113	71	98	2363	2070	690.5	297	787	472.5	hsa_circRNA_104328	hsa_circ_0005251	circBase	chr7	-	23015828	23030758	exonic	NM_032581	FAM126A	ACTTACATGCCCAGTGTTTCTCTTCAGTCACTGTGTCAAATTTGTTCAAGGTTGAAGGTT
ASCRP3001626	30	25	24	28.5	28	368	61	121	120	469	1405	838	hsa_circRNA_401764		25242744	chr17	-	29130918	29131126	exonic	NM_015986	CRLF3	ACTTAGTCCGAGAAGATCAAAGAAAGTGCATCACAGACAAGGGATGTTCTCAAACAGCAT
ASCRP3001627	29	21	21	29	23	315	146	313.5	344	878	2792	1618	hsa_circRNA_104329	hsa_circ_0005096	circBase	chr7	+	23224688	23224917	exonic	NM_007342	NUPL2	ACTTAGTCCTGATGAGCAGAAAGATGAAAAGAAACTTCTGTAATAATAGACGTGGATGGA
ASCRP3001628	28	20.5	22	28.5	25	53.5	50	161	100	115	165	127	hsa_circRNA_102095	hsa_circ_0006669	circBase	chr17	-	44159806	44172067	exonic	NM_015443	KANSL1	ACTTAGTTCTGAGGTGAAGACAGATCATGGGACTGATAAATTGGAGACGCAGGTCAGAAT
ASCRP3001629	21	71	95	40.5	27	53	61	221	52	166.5	218	165	hsa_circRNA_405156		25070500	chr13	-	60485868	60548590	exonic	NM_030932	DIAPH3	ACTTATGTGAACCTGAGCAGTTTGTGGTTGTGTTTGAAAAAGAGTTTACCGACCACCAAG
ASCRP3001630	27	22	17	27.5	24	699	119	264	213	1577	3311	2213	hsa_circRNA_103805	hsa_circ_0005524	circBase	chr5	-	31421378	31424578	exonic	NM_013235	DROSHA	ACTTATTCATTCATTTCCCAGATCATCATGAAGGACACTTAACTGACCTGCGCGAAGTCT
ASCRP3001631	48.5	198	191	76	54	458	275.5	910	367	755	1708	1132	hsa_circRNA_002368	hsa_circ_0002368	circBase	chr17	-	4186092	4192703	exonic	NM_003342	UBE2G1	ACTTATTTCAGGTTGATAAAAATGGTGATGTGTGCATTTCTATTCTTCATGAGCCTGGGG
ASCRP3001632	19.5	21.5	18	20	19	42	32	25	24	101.5	107	79	hsa_circRNA_103895	hsa_circ_0073051	circBase	chr5	-	74721185	74722303	exonic	NM_005713	COL4A3BP	ACTTCAAAGGGATAAAGACTGAATCTGGATATGGATCTGAATCCAGCTTGCGTCGACATG
ASCRP3001633	49	41	38	44.5	34.5	138	49	51	44.5	161	164	144	hsa_circRNA_089921	hsa_circ_0089921	circBase	chrX	-	15444028	15477863	exonic	NM_003662	PIR	ACTTCAAATTGGACCCAGGAGCCAAACATTCCCAACCTATCCCTAAAGGTATCCTACCTC
ASCRP3001634	20	21	18	21	23.5	109	31	77	59	270	568	356.5	hsa_circRNA_066083	hsa_circ_0066083	circBase	chr3	-	52675969	52677359	exonic	NM_018313	PBRM1	ACTTCAATATGGCTCAGAAAGTGAAGAAGATGCTGCTTTAGCTGGACTCCATCCAACTTG
ASCRP3001636	31	26	26	33	32	65	38	27	26	131	95.5	80	hsa_circRNA_104800	hsa_circ_0087305	circBase	chr9	+	82324537	82336803	exonic	NM_007005	TLE4	ACTTCACCTCCCAGGTGGGATTTGATCCACACCATCACATGCGTGTGCCAGCAATACCTC
ASCRP3001637	31	29	30.5	27	27	124	57	52.5	37	158	172	118	hsa_circRNA_402827		25242744	chr3	+	37061800	37067498	exonic	NM_000249	MLH1	ACTTCAGAAATGTCAGAGAAGAGAGGACCTACTTCCAGCAACCCCAGTTTAGAAATCAGT
ASCRP3001638	20	23	21	19	20	56	29	26	25	154	263	190	hsa_circRNA_406011		25070500	chr2	+	197537068	197559883	exonic	NM_001080539	CCDC150	ACTTCAGCAAGTCACTTCTGATTACCATGGGAACCTGCAGATATCTTTCAACAAGGAACA
ASCRP3001639	24	25	21	26	27	51	36	48.5	37.5	86.5	138	77	hsa_circRNA_405488		25070500	chr16	-	72341954	72425114	sense overlapping	NR_126330	LINC01572	ACTTCAGTGATTATAAAAGTTAAGGAGCCTTTCTGAAGGGAACTCACAAGGGCTTCGGTT
ASCRP3001640	19	18	18	19	26	51	28	51	34	141.5	313	214	hsa_circRNA_081794	hsa_circ_0081794	circBase	chr7	-	103777227	103824619	exonic	NM_002553	ORC5	ACTTCATCAGAGCTATTGCAAGGCAGTACTTAATTTTCCTAAATATTGTGAACCCGTGGT
ASCRP3001641	29	26	25	32	36	84	50	259.5	118.5	154	180	156	hsa_circRNA_104425	hsa_circ_0081006	circBase	chr7	-	91842508	91855996	exonic	NM_004912	KRIT1	ACTTCATCTCCTCAACATGGAAACTAAGGTATGGAAAAGTTGAGGCCACTCGCATATTGT
ASCRP3001642	36	35	35	51	44	638	92	358	224	1622.5	2789.5	1935	hsa_circRNA_057028	hsa_circ_0057028	circBase	chr2	-	171867882	171884915	exonic	NM_012290	TLK1	ACTTCATCTGCTTGGTAGAGGTGGCTTTAGTGAAGTGTATAAGGTTGACTTTGGCAGAAT
ASCRP3001643	135	77	75	169	63.5	7883	833.5	3156.5	2361	17317	26285	13911.5	hsa_circRNA_001788	hsa_circ_0001788	circBase	chr8	+	37623043	37623873	exonic	NM_007198	PROSC	ACTTCATTGGCCACCTACAGAAACAAAATGTCAACAAATTGATGGGATCTCCCAGCCATC
ASCRP3001644	77	105.5	115	129	105.5	3200	216	708	224.5	3977	3591	2788	hsa_circRNA_100604	hsa_circ_0009172	circBase	chr10	-	70218860	70229920	exonic	NR_102264	DNA2	ACTTCCCTCAGATGCAGCTCTCTCTATTTCAGAAGAAAGTGGTAGCTTCCTTTCCAAGAA
ASCRP3001646	80	63	51.5	101.5	88.5	308	85	70	63	375	465	392	hsa_circRNA_406044		25070500	chr2	+	216227368	216238260	antisense	NM_002026	FN1	ACTTCCTCTCCAGCTGGCTGTTGGCCTCTTGAAGGCAGTGACATGGTAGCCTGTCACCTG
ASCRP3001647	29	26	23	38	36	150.5	91.5	345	287.5	335	742	488	hsa_circRNA_034970	hsa_circ_0034970	circBase	chr15	+	43690235	43694048	exonic	NM_001286414	TUBGCP4	ACTTCCTGAGCAATTTGCTGGCTCAATCCTTTATCCTATTGAAACCTCAGATGCTACTCA
ASCRP3001648	44.5	64	62	115	109	1193	73	43.5	38.5	1504	897	827.5	hsa_circRNA_406309		25070500	chr3	+	99584817	99585905	intronic	ENST00000421999	CMSS1	ACTTCCTTTCCTGTCACAGGTTATTTTCACTTAGATATTGCACGTGGGCATTTTGGAGGA
ASCRP3001650	24	21	23	28	30	41.5	56	172	73	154	319	198	hsa_circRNA_407033		25070500	chr8	+	381340	385707	exonic	NM_012173	FBXO25	ACTTCTCAAGTGCAATTCAAGATATCCGAAGGTTCAATTATGTGGTCAAATATCTTAAAT
ASCRP3001651	28	23	21	28	22.5	65	28	57.5	47	125.5	222	159	hsa_circRNA_004672	hsa_circ_0004672	circBase	chr11	+	9441957	9446809	exonic	NM_006391	IPO7	ACTTCTGAAGGAAACACTTCAAGTTGAAGAAGATGATCGACCTGAGTTACCATGGTGGAA
ASCRP3001652	22	22	19	22.5	20	140	67	152.5	124	483	960.5	623	hsa_circRNA_102123	hsa_circ_0044623	circBase	chr17	+	48818462	48819092	exonic	NM_006107	LUC7L3	ACTTCTGCAACAGGTATGAGAAGAGCTCTCGTTTCATGAAAGTTGGCTATGAGAGAGATT
ASCRP3001653	29	26	22	27.5	27	82	75	212.5	120	287	439	297.5	hsa_circRNA_405603		25070500	chr17	+	48814320	48819092	exonic	NM_006107	LUC7L3	ACTTCTGCAACAGGTTTGTAAATATTATCTCTGTGGTTTTTGTCCTGCGGAATTGTTCAC
ASCRP3001655	20	23	19	22	22	34	29	50	29	75	64	62	hsa_circRNA_405704		25070500	chr18	-	67788791	67795782	exonic	NM_173630	RTTN	ACTTCTTAGACATGTACCATCTACCTGTTCATGTAATTGGACACCATGCTGTGAGTCCTT
ASCRP3001656	315	478	346	8714.5	4187	4173	508.5	1812.5	174.5	6186.5	3690.5	3481	hsa_circRNA_001038	hsa_circ_0000453	circBase	chr12	-	122495211	122495481	antisense	NM_020993	BCL7A	ACTTCTTCCCTCATCAGACCATTCTCTTCCTCACCCACCAGGCCTGGACACCCCCTGAAG
ASCRP3001657	24	20	19	24	20	113	73	168	123.5	395.5	656	496.5	hsa_circRNA_406537		25070500	chr4	-	129960195	130003528	exonic	NM_144643	SCLT1	ACTTGAAAATGTCATCAAGGAAAATGAAAGATCGAAGACTAAATGAAGATTTTAGGCGGT
ASCRP3001658	26	24	20	26	20.5	40	28	54	31	80.5	72	74	hsa_circRNA_100471	hsa_circ_0003659	circBase	chr1	-	227327276	227335260	exonic	NM_003607	CDC42BPA	ACTTGAACTCAGTAGAAAACTTCAAGGTTCAGTCCTCAGTGGCTGTAGGAACTCCAGATT
ASCRP3001659	23	22	18	25	24.5	32	32	44	27	71	90	75	hsa_circRNA_405193		25070500	chr14	-	31631798	31638674	sense overlapping	NM_015382	HECTD1	ACTTGACAGATCCCAAAGTTCATCTGGAAGAATAAATAGACTCTGTTACGGCATGGTGCA
ASCRP3001660	23	21	20	34	26	39	33.5	49	22	75	68	73	hsa_circRNA_405068		25070500	chr12	+	110922882	110927976	sense overlapping	NM_013300	FAM216A	ACTTGACAGTCTTGTCTCGTGTATTGAATTCGTGCCAAAGATAGAATCAAAGATGGATAC
ASCRP3001661	23	20	18	23	23	58.5	32	27	30	95.5	127	107.5	hsa_circRNA_403503		25242744	chr5	+	175913355	175916028	exonic	NM_014613	FAF2	ACTTGATATATTTAGGCTGCTGTACAGGACAGATTGAATGAGCAAGAGGGCGTACCTAGT
ASCRP3001662	21	28	28	27.5	24	78	37	51.5	40	149	272	186	hsa_circRNA_027612	hsa_circ_0027612	circBase	chr12	-	76461150	76462774	exonic	NM_004537	NAP1L1	ACTTGATGGTCTGGTAGAAACACCAACAGGATACATTGAAAGCAAAGAACAGTCTGAACT
ASCRP3001663	37	21	21	52.5	52.5	29	38.5	29.5	31	59	56	58	hsa_circRNA_007336	hsa_circ_0007336	circBase	chr16	+	15102635	15112822	exonic	NM_015027	PDXDC1	ACTTGGGACTTGATGGGTTTGTGGAGAGGATCAAGCATGCCTGTCAACTGCTCGGCTTGC
ASCRP3001664	20	21	22	20	19.5	44	34	30	34	226	292	197	hsa_circRNA_003632	hsa_circ_0003632	circBase	chr1	-	52959282	52975384	exonic	NM_015269	ZCCHC11	ACTTGGGATTTTAAAGAAAAATGCGATCACCAGAATATACCAATTGTCGGTATCTATGCA
ASCRP3001665	28	21	24	31	32.5	35	54	41	33	65	68	67	hsa_circRNA_000798	hsa_circ_0000321	circBase	chr11	-	64538243	64538337	intronic	ENST00000227503	SF1	ACTTGGGGTTTCTGTGGTTCATAAAGTTGGGATATGGGTACAGAAGCTTTTCCTCATAGG
ASCRP3001666	109	71	56	187	148.5	1134	159	110.5	106.5	1463	1094	810	hsa_circRNA_100372	hsa_circ_0015004	circBase	chr1	+	161293403	161326630	exonic	NM_003001	SDHC	ACTTGTCTTCCCTCTCATGTATCATACCTGGAATGGGATCCGACACTTGACACGTTGGTC
ASCRP3001667	25	42	50	38	30	38	58	87	34	70	65	59	hsa_circRNA_003099	hsa_circ_0003099	circBase	chr1	+	44137175	44149475	exonic	NM_014663	KDM4A	ACTTGTGCTGCAGGAGTGTGTCAGTGATGATGATTATTCTGACTCCACTGAAGTCAAATT
ASCRP3001668	38	38	38.5	29	31	89	38	25.5	33	121	108.5	98	hsa_circRNA_405543		25070500	chr17	+	15907201	15907487	intronic	ENST00000261647	TTC19	ACTTGTTATGAGTAAGGACATTGCCTAGTATTGGCCCCTCACTGAAGCAGTTTTCAAAAC
ASCRP3001671	19	20	17.5	19	19	39	28	44	29	62	76	73.5	hsa_circRNA_407084		25070500	chr8	+	67988716	68007967	exonic	NM_024790	CSPP1	ACTTTCGAGAGTGTATACAAATGACAGGGAAAGTTGTCAGCGAAGCTTTCTGAAAACAGT
ASCRP3001672	25	22	21	25	29	36.5	34	21	24	66.5	62	73	hsa_circRNA_406163		25070500	chr21	+	47088787	47093649	intronic	ENST00000400314	PCBP3	ACTTTCGGAAGCACATTGGAGATATATTTCCACAGCATCTGGCTTTTCTTGTTCCTGTTC
ASCRP3001674	33	28	34	34	29	62.5	31.5	29.5	34	101	95	80	hsa_circRNA_401015		25242744	chr12	+	98987752	98992481	exonic	NM_002635	SLC25A3	ACTTTGAGGGATGCAGCTCCCAAAATGTATAAGGAAGAAGGCCTAAAAGCAAAGATGTTC
ASCRP3001677	25	21	21	24	21	382	45	58	52	696	1071	747	hsa_circRNA_100578	hsa_circ_0004809	circBase	chr10	+	27469881	27470510	exonic	NM_032844	MASTL	ACTTTTAACCATTGATGATACAAAGAGAGCTGGAATGAAAGGTCCTGCGGTAGACTGGTG
ASCRP3001678	82.5	67	72	94	64	247	512	3329	1039	723	1647	1071.5	hsa_circRNA_402266		25242744	chr2	+	58311223	58316858	exonic	NM_006296	VRK2	ACTTTTGGGTTACAAAAATCCAGACCAGCTTTCCCCACAAATAAACCAGAGAAAGATGCA
ASCRP3001679	32.5	30	19	28	30	597	35	21	26	437.5	526	367	hsa_circRNA_400019	hsa_circ_0092342	circBase	chr11	+	8706439	8707219	intronic	ENST00000314138	RPL27A	ACTTTTTTCTCTGTTCTGTAAGTTAATTGGATGTTTTTCTGTACTTCCATACCTTCCCTT
ASCRP3001680	33	32.5	31	34	28.5	87	44	41	29	150.5	130	131	hsa_circRNA_403329		25242744	chr5	+	56152426	56155742	exonic	NM_005921	MAP3K1	AGAAAAAGAGTTTCCCCAGTGCCTTCGTGAGATGGAGAATAAAGAAACTCTCAAAGGGTT
ASCRP3001681	22	20	19	18	21	46	32	27	29	80	92	83	hsa_circRNA_401821		25242744	chr17	-	49269563	49270871	exonic	NM_017643	MBTD1	AGAAAAAGGCTAAGTCCCAGCAATACAAAGGACATAAGAAAAGTTACACAAAACTTCCTT
ASCRP3001682	30	24	24	28	28	91.5	50	119.5	113	211	399	281	hsa_circRNA_103439	hsa_circ_0001330	circBase	chr3	+	119222378	119236162	exonic	NM_016589	TIMMDC1	AGAAAACAGAAGGATCGAAAGGCACTCCATGAGCTAAAACTGGAAGAGTGCAATCTGCAC
ASCRP3001685	21	39	37	20	23	37	27	24	23	271	61.5	131.5	hsa_circRNA_102704	hsa_circ_0054254	circBase	chr2	+	42543101	42544664	exonic	NM_019063	EML4	AGAAAATATAGCAGATATGGAAGGTGCACTGTGGTTTGTTCTGGATGCAGAAACCAGAGA
ASCRP3001686	25	20	19	21	21	31	32	62	30	66	69.5	69	hsa_circRNA_001675	hsa_circ_0001675	circBase	chr7	+	7273933	7283381	sense overlapping	NM_020156	C1GALT1	AGAAAATCATGAATGAACAAAGAAATACACTTTCGGGAAATGGCCTCTAAATCCTGGCTG
ASCRP3001687	27	27	24.5	24.5	23	203	43	124	81	434	765.5	564	hsa_circRNA_102015	hsa_circ_0007882	circBase	chr17	+	27809214	27818883	exonic	NM_020791	TAOK1	AGAAAATCCCTCAAGATCGACCTACATCAGAGGAACTTTTAAAGGATGGCCCCAGAAGTA
ASCRP3001689	28	24	23	27	28	55.5	33	62	25	108	99	73	hsa_circRNA_103859	hsa_circ_0072688	circBase	chr5	-	64747301	64769779	exonic	NM_197941	ADAMTS6	AGAAAATGGGATTGCCCACCACGATAATGCAGTTCTTATTACTAGGTTAAAAAATGGCCA
ASCRP3001690	33	25	28	43	35.5	49	35	33	29	91	92	79	hsa_circRNA_104216	hsa_circ_0078223	circBase	chr6	-	149997395	149997873	exonic	NM_004690	LATS1	AGAAACACAAATGAAGGTGACCATCCACGGCAAGATAGCATGGATTTCAGTAATGAATGG
ASCRP3001692	34	29	29	27	27	110	74	248.5	179	137.5	217	136.5	hsa_circRNA_102201	hsa_circ_0045838	circBase	chr17	+	74738050	74738355	exonic	NM_024311	MFSD11	AGAAACAGTGGGATTTTCTGGGCACTTCTGCAGTCTAGCATGTACATTGCCGTTTTCATC
ASCRP3001693	26	26	23	21	23	39.5	51.5	41	46	76	72	59	hsa_circRNA_401220		25242744	chr14	-	23550956	23559842	exonic	NM_014977	ACIN1	AGAAACCAAGGAAAGGAGAAAGACGATCATCTAGGGTCAGACAGATTGGTGAGGAAATGA
ASCRP3001694	19	20	20	23	20	53	38	73	42	128	211.5	152	hsa_circRNA_401263		25242744	chr14	-	58758352	58759856	exonic	uc010apd.2	FLJ31306	AGAAACCTGGATCTGCGATCTGTTTGTGGTGAGCATTTGTACAGTGAAACATTTTGCTAC
ASCRP3001695	42	40	34	53.5	41	41	55	32	45	82	68	64	hsa_circRNA_406725		25070500	chr5	-	180286875	180286984	intronic	ENST00000359141	ZFP62	AGAAACTAAACAGCCATCTATTCGGGGGCATTTGGGTTGTCTCCAATTTGTTGTTACTTC
ASCRP3001696	26.5	23	20	25	25	60	30	23	21	123.5	137	114	hsa_circRNA_014491	hsa_circ_0014491	circBase	chr1	-	155141883	155145368	exonic	NM_173852	KRTCAP2	AGAAACTGACCCTGAATGTTCAATAAAGTTGATTCTTTGTATGGTGGGTACGGGCACCTC
ASCRP3001697	20	25	21	25	21.5	62	31	24.5	26	146	230.5	175	hsa_circRNA_028202	hsa_circ_0028202	circBase	chr12	-	110893390	110895439	exonic	NM_016301	GPN3	AGAAACTGACTAAAGCTATATGTGGACTGGTCAGATTGAGTTGTACACTCACCTGCCTGT
ASCRP3001698	26	32	24	24.5	24	50	49	43	34	95	91	71.5	hsa_circRNA_103686	hsa_circ_0070348	circBase	chr4	-	85781564	85781775	exonic	NM_014991	WDFY3	AGAAACTGTATATGATGCTGCCAGTGTTTAACAGGAATTAGAAGTGCGTCTCACCAACCA
ASCRP3001699	25	27	28.5	24	23	46	49	79	70	119	190	130	hsa_circRNA_405779		25070500	chr19	-	37935808	37945975	exonic	uc002ogj.3	ZNF569	AGAAAGAAGAGGAAATGACTGAGTCCCAGGGATGTAAACAGCTGGAAAGAACTTTGCTTC
ASCRP3001701	27	26	23	21	24	47	31	25	29	83	101	93	hsa_circRNA_020151	hsa_circ_0020151	circBase	chr10	-	120828957	120830597	exonic	NM_003750	EIF3A	AGAAAGAATCTCACACAAGATGAGATGCAAAGCTTTCAAATTCTGCCTCCAATACACGCG
ASCRP3001702	27	26	29	20	19	34	34	41	33	75	94	77	hsa_circRNA_404743		25070500	chr10	+	33093942	33113532	exonic	NM_024688	CCDC7	AGAAAGAGTTACCCTGAGACTGATATAGAAAGCTTGAGAGGTGCTTTGGGAAGACGCTTA
ASCRP3001703	26	29	25	25	25	43	43	60.5	56.5	69	107	88	hsa_circRNA_006599	hsa_circ_0006599	circBase	chr12	-	459786	461490	exonic	NM_001042603	KDM5A	AGAAAGATTCTGCCAGAAGAAGAGGAATGTAGCAAACCTCGAGAAGCCTTTGGATTTGAA
ASCRP3001704	20	24	18.5	22	22	32	37	53	36	60	67	62.5	hsa_circRNA_005852	hsa_circ_0005852	circBase	chr2	+	63206322	63217975	exonic	NM_015252	EHBP1	AGAAAGCTGTAACTGAGAGCTCAGAGCAGGACATGAAACAGCAAGATGAAGAGCGACGTC
ASCRP3001705	30.5	29	31	38	38	205	69	254.5	162	669.5	1278	707	hsa_circRNA_101044	hsa_circ_0025905	circBase	chr12	+	42768664	42768876	exonic	NM_016488	PPHLN1	AGAAAGGAGCAAATCATACTCTTTCCATCAGTCTCAACATAGAAGGACATGAGAGATGGC
ASCRP3001707	25	26.5	22	26	23	46	35	29	31	117	95	76	hsa_circRNA_406763		25070500	chr6	-	35604790	35614627	intronic	ENST00000540787	FKBP5	AGAAATGAACCATTTGTCTTTAGTCTTGGCAAAGGTGTTTGCTGACTAGCACTTTGGAGA
ASCRP3001708	44	37	36.5	33.5	34	86	39	27	34	104.5	105.5	104	hsa_circRNA_030355	hsa_circ_0030355	circBase	chr13	+	53191604	53203917	exonic	uc021rjx.1	HNRNPA1L2	AGAAATGACCCACCAGACCAGAAACGGAAGAGAGCGCGGGGGATGTGTTTGGCGTGGGGC
ASCRP3001709	26	22	20	22	21.5	130	50.5	173	146	311	541	388.5	hsa_circRNA_401095		25242744	chr12	-	123678932	123679148	exonic	NM_022782	MPHOSPH9	AGAACAAAATGTTTCAAGATAATGATTTGAGAGAACGCTTCAGTGCAGCCAGCAGTGCTT
ASCRP3001710	29	23	22	27	28	49	69	367	161	115.5	162	131	hsa_circRNA_400651		25242744	chr10	+	115636279	115644139	exonic	NM_198514	NHLRC2	AGAACAACAACCCATTAGTTCCCCTTGGGATGTAGTTTTTGGAACATCAGATGGTCTTCT
ASCRP3001712	30	26	21	28	27	131	47.5	160	78.5	221	398	283	hsa_circRNA_101247	hsa_circ_0029961	circBase	chr13	+	33306237	33320238	exonic	NM_015032	PDS5B	AGAACAATATCAGCTATGTGCATTAGCTATCAACAGCCTTGCTTCCTGTTTTACATCACA
ASCRP3001713	25	23	20	22	24	56	31	20.5	22	107	152	123.5	hsa_circRNA_067926	hsa_circ_0067926	circBase	chr3	+	169991073	170011296	exonic	NM_002740	PRKCI	AGAACACAGAGGATTATCTCTTCCAAGGAACCAGTGATGCCCATGGATCAGTCATCCATG
ASCRP3001714	22	22	22	23	28	73	29.5	28	29	140	288	198.5	hsa_circRNA_406485		25070500	chr4	-	68396532	68409913	exonic	NM_001812	CENPC	AGAACCAAGTGAAGCCACAAACAGATCAGGATCATCTCAAAAATGGCTACAGAAGAAGAT
ASCRP3001715	32.5	47	45.5	35.5	22	91.5	73	83	64.5	227	371	203	hsa_circRNA_059060	hsa_circ_0059060	circBase	chr2	+	242282406	242283312	exonic	NM_004404	SEPT2	AGAACCCAGAGCACAATGACTTTCTGAAGCTGAGAACCATGCTCATATTCTGGATGAAAT
ASCRP3001717	26.5	23	21	36	45	38	30	25	26	75.5	111	89	hsa_circRNA_406388		25070500	chr3	+	156570556	156606186	intronic	ENST00000467376	LEKR1	AGAACGAATGCCAGATCTACAACATTCTGTCACTGAGCCATACATAGATGTTGCCTGAAG
ASCRP3001718	200	96.5	95	105	68	5942	307	539	599	6616	10542	7945	hsa_circRNA_100656	hsa_circ_0004896	circBase	chr10	-	99196947	99197507	exonic	NM_016046	EXOSC1	AGAACGAGCTGGGAGTGGTGGTAGCCCACAGTGAGTCAGGTTGAAATTTATAAGAGTTTC
ASCRP3001719	11857	22720	14752.5	7007	3304	22113	11882.5	13957	7630.5	17912	15820	13866	hsa_circRNA_010096	hsa_circ_0010096	circBase	chr1	+	16093870	16101291	exonic	NM_017556	FBLIM1	AGAACGAGGTGTACTGCCTGGACGACTTCTACAGGATGCCCACCCCCTCCTCCTGTCCTG
ASCRP3001720	24	26	23	27.5	24	39.5	31	29	23	63	52	59.5	hsa_circRNA_403173		25242744	chr4	-	85758081	85853516	exonic	NM_014991	WDFY3	AGAACGTCGAGGACTACTCCAGAAAGTTTTTGTACAGGTATAATACTTCTCCACGTCTGC
ASCRP3001721	28	26	24.5	29	27	50	43	37	48	114	148	114.5	hsa_circRNA_105014	hsa_circ_0091175	circBase	chrX	-	80047352	80049271	exonic	NM_153252	BRWD3	AGAACTACCTGTAAATTATGTGAAACCTCCAAATGTGGGTGGCAGCAAATGCACACATTC
ASCRP3001723	22	22.5	21	23	21	36.5	31	21	22	60	51	53	hsa_circRNA_004512	hsa_circ_0004512	circBase	chr11	+	65093858	65094257	intergenic			AGAACTGAAGCATTGGATTAGCAGCTCAGGATACCGCCTTCAAACAAGGGGTTCAGCTTC
ASCRP3001724	24.5	22	21	25	27	146	50	62	46	206	527	347	hsa_circRNA_104754	hsa_circ_0003624	circBase	chr9	+	33886878	33900269	exonic	NM_017811	UBE2R2	AGAACTGCCTTCTGAAAGGTGGAATCCTACTCAGAATGTGAGGCGCATATTAAATTTCCT
ASCRP3001726	44.5	25.5	34	30	38	52.5	61	154	111	180	220	156	hsa_circRNA_103359	hsa_circ_0008639	circBase	chr3	-	47716964	47719801	exonic	NM_003074	SMARCC1	AGAACTTTGGTCTCCGTACTGACATTTACTCCAAGAAAACATTAGCAAAGATACTTGGCA
ASCRP3001729	26	23	21	26.5	29	37	28	22	23	60	59.5	65	hsa_circRNA_406591		25070500	chr5	-	16779653	16783578	exonic	NM_012334	MYO10	AGAAGACAAGACAATCAGTGACCAGGAATCCTTTAGGGAAGTTATTTGGTGAAAGTGGGG
ASCRP3001730	44	24	23	30	33	36.5	37	32	36	70	78	69.5	hsa_circRNA_008672	hsa_circ_0008672	circBase	chr1	+	33133825	33138502	exonic	NM_005610	RBBP4	AGAAGACAATATCATGCAAGTGTGGCAAATGAATTTGGAGGTTTTGGTTCAGTTAGTGGA
ASCRP3001731	25	25	21	22.5	24.5	115	71.5	147	131	206.5	440	316	hsa_circRNA_103938	hsa_circ_0001529	circBase	chr5	-	132227855	132228810	exonic	NM_014423	AFF4	AGAAGACCGAAGGGAAGACTTCCAGTAGCTCCAAGGAGGTTAAGAATGAAGATGATAACC
ASCRP3001732	37	31	28	34	26	80	124	546	399	497	154	265	hsa_circRNA_000479	hsa_circ_0000479	circBase	chr13	-	43528083	43544806	exonic	NM_033255	EPSTI1	AGAAGAGAAGCATTTAGAGAGCATCAGCAATACACAAGTGCATACACCTTGATAGCACCA
ASCRP3001733	27	25	24	27	32	107	45.5	89.5	56	269.5	657.5	389.5	hsa_circRNA_079800	hsa_circ_0079800	circBase	chr7	-	33060883	33063720	exonic	NM_016489	NT5C3A	AGAAGAGAAGTACCCTTATATGGTGGAATGATAATAACGGACTTTGATATGACACTCAGT
ASCRP3001734	24	23	22.5	22	24	46	37.5	77	69	124.5	190	144	hsa_circRNA_400835		25242744	chr11	-	111706887	111709101	exonic	NM_001077690	ALG9	AGAAGAGCCATCCAGATATAAATGTTACCACTTTGTGTTTCAACGATATCGCCTGGAGCA
ASCRP3001735	32	35	31	29	27.5	164	42.5	66.5	68.5	177	322.5	229.5	hsa_circRNA_103072	hsa_circ_0002096	circBase	chr20	-	44477088	44483931	exonic	NM_005469	ACOT8	AGAAGAGCTGCTTGACTGTGAGACCCTCATTGACCAGTATTTAAGAGGAAGGCATTACTG
ASCRP3001736	24	26.5	21	21	20.5	101	41.5	48	45	187	301	213	hsa_circRNA_102970	hsa_circ_0059071	circBase	chr2	+	242343242	242352836	exonic	NM_014808	FARP2	AGAAGATACTAGAATTCCATCAGAAGCACGTCCTAAATGCGATGGCCAGGTATTACTGAC
ASCRP3001737	28	28	25	20	20	139	56	103	68	264	303	207	hsa_circRNA_102336	hsa_circ_0047322	circBase	chr18	+	23895192	23915195	exonic	NM_005640	TAF4B	AGAAGATCCAGAACAGCTGAGATTAAAGCAGAAAGCCAAAGAGAGATGAGGATGACATCA
ASCRP3001738	24	26	25	24	25	57	28	23.5	27	66	71	59	hsa_circRNA_003722	hsa_circ_0003722	circBase	chr10	+	120867459	120892121	exonic	NM_001303111	FAM45A	AGAAGATCCAGAGAAATCAGAGAGCCACGTTATACAGTGACCATCTTTCCACCGTAGAAA
ASCRP3001739	23	28	22.5	22	20.5	39.5	42	46.5	54	101	119	96	hsa_circRNA_004868	hsa_circ_0004868	circBase	chr20	-	48256214	48257202	exonic	NM_004776	B4GALT5	AGAAGATGACGACCTCTGGAACAGGTTGGTACCCAACCCTTTAATCGAGCCATGCTTTTC
ASCRP3001740	47	34	21	31	34	61	46	47	45	84	87	84	hsa_circRNA_404846		25070500	chr11	+	9495323	9496180	exonic	ENST00000496276	ZNF143	AGAAGATGGTACCACAGCATTTATTCACCACACCTCCAAAGGATCACTGGATGTGTTATT
ASCRP3001741	28	20	20	21	21	34	31	25	28	58	63	59	hsa_circRNA_024825	hsa_circ_0024825	circBase	chr11	+	126275990	126283543	exonic	NM_006278	ST3GAL4	AGAAGCAGACCATTCACTACTATGAGCAGATCACGCTCAAGTCCATGGCGGTGGCCCGAG
ASCRP3001742	20	21	18	21	19	112	46	79.5	70	169	239	193.5	hsa_circRNA_100582	hsa_circ_0004126	circBase	chr10	+	31661946	31791437	exonic	uc001ivr.4	ZEB1	AGAAGCCAGTGGTCATGATGAAAATGTTTTCAGTTTAAATTCTCAACTGGCAATTGGCCG
ASCRP3001744	20	20.5	18.5	44	85	44	29	22.5	24.5	66	83	78	hsa_circRNA_101667	hsa_circ_0005648	circBase	chr16	-	249060	258187	exonic	NM_018032	LUC7L	AGAAGCTTGATCAGTTGAGGGCAATGGATCACTTGGAGTCCTTTATTGCTGAATGTGATC
ASCRP3001745	24	25	21	32	27	46	33.5	37	33	95.5	121	87	hsa_circRNA_078216	hsa_circ_0078216	circBase	chr6	-	149922729	149925918	exonic	NM_007044	KATNA1	AGAAGCTTGTTCGTCTTCTGTTTGAAATGAACAAATCACCTGCTGCAGTAACAGAACCAG
ASCRP3001746	28	23	20	44.5	40	49	45	135	154	276	341	288	hsa_circRNA_005067	hsa_circ_0005067	circBase	chr1	-	32381491	32385259	intronic	ENST00000602889	RP11-84A19.4	AGAAGGAATCCACGTTCTAGTGAGTTTTTCGTTGGAATATACGTTGCACATTTATGGCGA
ASCRP3001747	31	24	22	29	28	45	37	40	39.5	88	86.5	82	hsa_circRNA_040929	hsa_circ_0040929	circBase	chr16	-	89371613	89383486	exonic	NM_013275	ANKRD11	AGAAGGACTCGGACACAGCAGACGGTTGATGATGAAGCGCCGGCCGTGTAAATGAAGATC
ASCRP3001748	22	26	21	24.5	23	39	33	33.5	34	81	164	110.5	hsa_circRNA_017359	hsa_circ_0017359	circBase	chr10	+	225933	255988	exonic	NM_006624	ZMYND11	AGAAGGATATTGGTTGCCAGGAGATGAGATTCTAAAGAAGTAAACAGGTCATGGCACGTT
ASCRP3001749	23	23	21.5	22	23	52.5	30	25	21	69	67	64	hsa_circRNA_400987		25242744	chr12	-	66923610	66990707	exonic	NM_021150	GRIP1	AGAAGGCAATACCTTTGGTTTTGTAATTCGAGATGAGAGTCCCTACACTAAATCCGCCAG
ASCRP3001751	30	26	27	49.5	44	48	45	64	43	128	172	117	hsa_circRNA_101859	hsa_circ_0040188	circBase	chr16	-	70292882	70296427	exonic	NM_001605	AARS	AGAAGGCTGAAGAGATTGCTAATGAGATGATTGAGGCAGCCAAGTATTTGAGAACACAGT
ASCRP3001752	21.5	26	25	33.5	35	33.5	47.5	43	28	73	69.5	60	hsa_circRNA_103199	hsa_circ_0062887	circBase	chr22	+	31661931	31664186	exonic	NM_005569	LIMK2	AGAAGGTCAGGTTTGCCAAAGGAATCGCCTCCGGAATGGCGCAGTAACAGTATCTCCAAG
ASCRP3001753	23	22	18	20.5	23	38	34	37	30	75	67	54	hsa_circRNA_104125	hsa_circ_0076794	circBase	chr6	-	53138017	53156761	exonic	NM_021814	ELOVL5	AGAAGTACATCACTCAGGGGCAGCTGATACTAGAGTAAAAGGATGGTTTCTTCTGGACAA
ASCRP3001754	81	55	42	98.5	100	652	75	82	79	407	523	397	hsa_circRNA_405776		25070500	chr19	+	37579940	37587017	exonic	ENST00000587082	ZNF420	AGAAGTCTGCCATCTGTTTCATTGTTATTCCTTTTCTCTGCATTCTCCAGACTCTGTGCT
ASCRP3001755	21	23	21	30.5	27	46.5	75.5	340	194.5	197.5	263	152	hsa_circRNA_402237		25242744	chr2	-	45715378	45780869	exonic	NM_018079	SRBD1	AGAAGTGCAGGTGGAGACCACGTAGCTTTGCAAGGCCAGAGTTAATGAAGATCTTATATA
ASCRP3001756	33	33	28.5	32	30.5	31	34	31	24	58.5	53	50	hsa_circRNA_001835	hsa_circ_0001835	circBase	chr9	+	2643266	2643521	sense overlapping	NM_003383	VLDLR	AGAAGTGGCGATGTGATGGGGACCCTGACTGCAAGGATGGCAGTGATGAGCTGGACTGTG
ASCRP3001758	77	44.5	39	59	28	3125	891	1146	1340	6904	16329	8951	hsa_circRNA_001312	hsa_circ_0001312	circBase	chr3	+	56600621	56601081	exonic	NR_024460	CCDC66	AGAAGTTCGTTGGAAGCAAAAAAAGCCCAGTGGAGGAAAGAGCTAGGTCAATATAGTCTA
ASCRP3001759	26	30	26	21	23	68	62	127	63	149	176	121	hsa_circRNA_013093	hsa_circ_0013093	circBase	chr1	+	89206670	89251896	exonic	NM_006256	PKN2	AGAAGTTTACACTGGAACTGGACAGGGGGGATTCCCGAAGTCTTCCGTTTTCTGAGAATG
ASCRP3001760	41.5	38	37.5	43.5	42	513.5	51	58	58	1128	2049	1300.5	hsa_circRNA_104232	hsa_circ_0078357	circBase	chr6	+	155063089	155099179	exonic	NM_001286189	SCAF8	AGAAGTTTATTCAGAAAGATTGTGCCTCTACTCCTGCTTGTACAGACTGCTTTTCCAGCA
ASCRP3001761	22	22	20	18	21	39	29	26	19	97	68	55	hsa_circRNA_009556	hsa_circ_0009556	circBase	chr1	+	8030953	8045342	exonic	NM_007262	PARK7	AGAATAAACAGGGCATTTAGCAAACTATCTGCTGCTGTGAAGGAGATACTGAAGGAGCAG
ASCRP3001762	29	23	22	29	24	837.5	87	258.5	158	1150.5	1986	1166.5	hsa_circRNA_001406	hsa_circ_0001406	circBase	chr4	+	42024854	42025401	exonic	NM_006345	SLC30A9	AGAATACAGAGAAATGATCTAGAACAACTTCGAAAAATCAGACGACGAAGTCCCCATGAA
ASCRP3001763	32	26	26	28	37	52	50	50.5	39	92	92	77.5	hsa_circRNA_101690	hsa_circ_0037681	circBase	chr16	-	3860603	3860780	exonic	NM_004380	CREBBP	AGAATACTTCAGTCACCAACGTGCCAAATATGATGGGAATAACTGGGAACACAAGTCCAT
ASCRP3001764	30	25	24	49	47	29	39	21.5	23	59	49	57	hsa_circRNA_404963		25070500	chr12	-	10741985	10752211	sense overlapping	NR_028045	KLRAP1	AGAATAGACTCTATTTTCTCTGATTCGGTGTGCGCCAAGAAGAAAAGCCCCTAAGGGATC
ASCRP3001766	26	23	19	21	19	43	36	48	43	88.5	92	74	hsa_circRNA_006929	hsa_circ_0006929	circBase	chr5	+	68881420	68882183	exonic	NM_001042490	GTF2H2C_2	AGAATATAATGGAGAAAGGCATTTGGATGGCAATACTGAGCCAGGGCTTACATTAGGAGG
ASCRP3001767	27	26	24	26	26	55	43	33	26.5	92.5	87	60	hsa_circRNA_103813	hsa_circ_0072255	circBase	chr5	-	37326002	37328522	exonic	NM_004298	NUP155	AGAATATTCAAGAGTGGCAACAGAGAGATCACTGCAGTTCTCCTGTTCCTAGTGGTAGTC
ASCRP3001768	23	22.5	24	28	23	86	35	93.5	83	175.5	252.5	186	hsa_circRNA_406168		25070500	chr21	+	47783394	47801757	sense overlapping	NM_006031	PCNT	AGAATCACCAAGTCCAGCAGGTGTAAAACACAATCTAATTGAAGACCACCAGAAGGAACT
ASCRP3001769	34	25.5	22	28	23	1166	157.5	727	484	2157	4097	2614	hsa_circRNA_100078	hsa_circ_0010440	circBase	chr1	-	21076215	21076375	exonic	NM_016287	HP1BP3	AGAATCACCCAGGAACCAATTCTAACTATCAAACTGAAGAAATCAGGGGAGAAACCCCTG
ASCRP3001771	2021.5	3859	5388	8546	5150	20797.5	3125	10795	1393	16101.5	22154	17330	hsa_circRNA_001073	hsa_circ_0000687	circBase	chr16	+	29756705	29756841	sense overlapping	uc002dtq.1	BC041466	AGAATCCCCATTTCCCTCCCAGACCCCAGGGTGCCTCAGACAAGAAAGGGTAAGCGTGAG
ASCRP3001772	24	20	19	20	22	63.5	34	35.5	29	169.5	189.5	173.5	hsa_circRNA_092397	hsa_circ_0000425	circBase	chr12	-	90021454	90024422	exonic	NM_001682	ATP2B1	AGAATCGCAACAAAGGTACTCATGTAATGGAAGGCTCTGGAAGAATGGTAGTTACAGCTG
ASCRP3001773	21	24	22.5	19	22	39.5	41	232	151.5	116	139	92.5	hsa_circRNA_102182	hsa_circ_0005347	circBase	chr17	+	65887959	65890281	exonic	NM_004459	BPTF	AGAATCTTTAGGACATACCAGTAGGTGATTTCAAATCGGAGAAGTCCAACGGGGAGCTAA
ASCRP3001774	19	19	18	20	18	37	28	52	29	62	66	60	hsa_circRNA_001773	hsa_circ_0001773	circBase	chr7	+	156994414	157024021	exonic	NM_014671	UBE3C	AGAATGCTTGGAAAGGCTTCTCTACAGTTTAGCCTTTAATGCCAGGTTTCTGAGACATCT
ASCRP3001776	28	29	23	28	26.5	36	36	60	27	65	54	52	hsa_circRNA_104350	hsa_circ_0079933	circBase	chr7	+	40027197	40102699	exonic	NM_003718	CDK13	AGAATTAATAAGACGGTCTGGAAAATCCCGAAGCAGAAGCCCGTATTCATCTAGGCATTC
ASCRP3001777	42	29	755	33.5	30	315	250.5	1328.5	616.5	426.5	888	549	hsa_circRNA_100066	hsa_circ_0010052	circBase	chr1	+	15956819	15978390	exonic	NM_032341	DDI2	AGAATTAGCAGAAGCCCTTCAAAAATCAGCAGAGGATGCAGACTTACCCCGAATAGATTT
ASCRP3001778	28	31	27	30	23	49	58	428.5	156.5	144	163	133	hsa_circRNA_101227	hsa_circ_0029636	circBase	chr13	+	20632714	20641530	exonic	NM_003453	ZMYM2	AGAATTATGCACCTGACAGCATCTATTACCTTTGCCTTGGAATACAGGAGGGTTCAGCAC
ASCRP3001779	25	25	21	26	28	123	40	59	54	182.5	273	231	hsa_circRNA_056542	hsa_circ_0056542	circBase	chr2	+	135703670	135705469	exonic	NM_001241	CCNT2	AGAATTATTAGATGCAAGCAAGGATTTGGCACAGACATCCTATTTCATGGCTACCAACAG
ASCRP3001780	39.5	28	25	41	34	131	162	1383	334	482.5	762	408	hsa_circRNA_104332	hsa_circ_0079619	circBase	chr7	+	24663284	24681487	exonic	NM_016447	MPP6	AGAATTGGTTGGTATACTCAAAGAACCTCACTTCCAGCAATGCAGCAAGTCTTGGAAAAC
ASCRP3001782	23	19.5	17	29	35.5	31	32	30	30	71.5	97	83.5	hsa_circRNA_102344	hsa_circ_0005122	circBase	chr18	+	29691716	29706763	exonic	NM_016271	RNF138	AGAATTTGTGTTTCTGTAGAAAATGTTTCCTGACTGCAATGAGGGAAAGCGGAGCACATT
ASCRP3001783	31	25	19.5	31	30	63	50	68	40	88	258	172	hsa_circRNA_003939	hsa_circ_0003939	circBase	chr9	+	108296773	108301632	exonic	NM_001145313	FSD1L	AGACAAAATTTACTCAGCCAGTACTACCTGGTTTCATGAAGTGGTACACCATCCCCAAAA
ASCRP3001784	21	24	23.5	19	19	43	39	63.5	46.5	80	66	57	hsa_circRNA_037563	hsa_circ_0037563	circBase	chr16	+	2807472	2810500	exonic	NM_016333	SRRM2	AGACAAAGATAAAGACAAGAAGGAGGTACGAGGAACAGCAAATTCAGGAAAAAGTGGCGA
ASCRP3001785	30	24	20	25	23	74	56	282	222.5	222.5	247.5	211.5	hsa_circRNA_064022	hsa_circ_0064022	circBase	chr3	-	3214459	3216950	exonic	NM_001173482	CRBN	AGACAAAGGTTCAAAGTCCTTGAGCTAAGAACACAGTCAGATGGAGAGTGAGGAAGAAGA
ASCRP3001786	27	25	21	24	23	52	33	35	26	76	113	92.5	hsa_circRNA_407166		25070500	chr9	+	27009017	27029102	exonic	NM_025103	IFT74	AGACAACTTGACATGGATTTAGAGGAACACCAAGGAAAGAAAAACAAATCAGAAGTGTCG
ASCRP3001787	88.5	89	45	72	64	195	87	90	75.5	295	283	237.5	hsa_circRNA_405709		25070500	chr19	-	334399	336173	exonic	NM_017550	MIER2	AGACAAGCCCAAGGAGGAGCTGGAGAAGGACTTCATCTCCCAGGCCTCCTCGCTGGGGAG
ASCRP3001788	22	21	19	26	25	31	32	36	26	54	56	57	hsa_circRNA_407101		25070500	chr8	+	94784816	94794688	exonic	NM_153704	TMEM67	AGACAAGGCTAAATGCTGCTTATTCATTTGGAACAACCTACCAACAAAATGGCATGTCTT
ASCRP3001789	35	29.5	27	40	46	87	40	69	68	160	145	154	hsa_circRNA_104838	hsa_circ_0087641	circBase	chr9	-	99284787	99327765	exonic	NM_003671	CDC14B	AGACAATCCAAAACAAACGCTATTCCTCTCACATCGCCTTTGTTTTGCCATTCTCTACAG
ASCRP3001790	68	53.5	54	70	103.5	228	59	118.5	93	420	565	338	hsa_circRNA_104456	hsa_circ_0008628	circBase	chr7	-	105099614	105105861	exonic	NM_019042	PUS7	AGACACCACCAGTTTTTGCTTCTGCCACAGCCACCTATATTGAGGAAGATGATGTTAATA
ASCRP3001791	21	23	23	21.5	22	232	47	72.5	57	477	847	449	hsa_circRNA_001531	hsa_circ_0001531	circBase	chr5	+	132426884	132428481	exonic	NM_002154	HSPA4	AGACACCAGCAGAAAATAAGGCAGAGTCTGAAGAAATGGAGCTCAGTTTTCAGTTCAGAA
ASCRP3001794	66	83	87	53.5	42	2571	217	132	80	2605	2379	2057	hsa_circRNA_028152	hsa_circ_0028152	circBase	chr12	-	110397651	110399490	exonic	NM_014776	GIT2	AGACAGCAGGGCAGTTCTCTCTCGGGTTCAAAAGCTAAGTAATCATTTGTTTGAAGAACT
ASCRP3001795	25	27	23	22	27	52	29	23	23	90	73.5	65.5	hsa_circRNA_404815		25070500	chr10	+	122395277	122395661	intronic	NR_049879	MIR5694	AGACAGCAGTTGTCAGGGAGCCCAGCTTTCAGATGTGATGTCTAAATGAGAATTGAAATA
ASCRP3001796	50	32	27	61	70	40.5	52	32.5	47.5	78	73.5	72	hsa_circRNA_406146		25070500	chr21	-	36421138	36437369	exonic	uc002yut.1	RUNX1	AGACAGCATATTTGAGTCATTTCCTTCGTACCCACAGTGCTTCATGAGAGAGCGAGCCCG
ASCRP3001797	37	51	59	52	48	146	58	122	70.5	209	334	237	hsa_circRNA_103143	hsa_circ_0003342	circBase	chr21	+	45497573	45500008	exonic	NM_003274	TRAPPC10	AGACAGCCCAGGATTTGTCCCATGCCACCATTGAAATGTATACAAGCATTGGGAGGATTC
ASCRP3001798	24	20	20	25.5	26	46	48	96	67	88.5	114	73	hsa_circRNA_101878	hsa_circ_0004172	circBase	chr16	-	74694829	74695349	exonic	NM_018124	RFWD3	AGACAGTGCCAGTGATGGCTCATGAAGCAATGGAATATGATGTTCAGGTGCAGTTAAATC
ASCRP3001799	23	23	20	26	30	314.5	48	116	57	529	794	499.5	hsa_circRNA_101095	hsa_circ_0027485	circBase	chr12	+	69120278	69121169	exonic	NM_020401	NUP107	AGACATACATACAGGTTTGATGGATGAGTTTAGCAAATGGCTTTCCAAAAGCAGAAACAA
ASCRP3001800	43	29.5	31	36.5	30	82	234	1302.5	543	358	568.5	467.5	hsa_circRNA_000259	hsa_circ_0000259	circBase	chr10	+	105767934	105778666	exonic	NM_014720	SLK	AGACATCAGCTACTTAAGCGCCACGAGAAGAGTAAAAAGCGACAATATGACCAGGAAATT
ASCRP3001801	80	118	73.5	68	53	757	92.5	68	71.5	626	490	438.5	hsa_circRNA_103689	hsa_circ_0007324	circBase	chr4	+	87693930	87696805	exonic	NM_006264	PTPN13	AGACATGTCACTTCCTTCATTGGTATTGAAAGCAACAAGTAATCCTTCCCCTCTACCACC
ASCRP3001802	63	66.5	57	60	50	417	61	46	52	315.5	290	200	hsa_circRNA_001832	hsa_circ_0001832	circBase	chr8	+	145223197	145255444	exonic	NM_032450	MROH1	AGACATGTCATCAACTCAGCTGAGCTGGCCTCCACCCTGCTGGACGCCATCACCGATAAG
ASCRP3001805	21	24	20.5	21	17	113	32.5	34	29	124	168	117	hsa_circRNA_000806	hsa_circ_0000806	circBase	chr17	-	74060056	74066525	exonic	NM_014230	SRP68	AGACCAAATTAGAGGCTCAGTTCTTCAGATTATTAAGGAATCCCAGCAGCAGCATGGTTT
ASCRP3001806	31.5	57.5	84.5	34	30	52	65.5	116	60	117	170.5	126.5	hsa_circRNA_405792		25070500	chr19	-	46133214	46133304	intronic	ENST00000588496	EML2	AGACCAAGGTGGTGGATAATGGAGGCAACCTGCTGTGTGCAGTGGATGAATCCAATGATC
ASCRP3001807	21	21	18	20	21	93	35	66	45	197	321	179	hsa_circRNA_102933	hsa_circ_0058521	circBase	chr2	+	228384663	228401709	exonic	NM_004504	AGFG1	AGACCAATGCCAGAGGAGCAACAGGTCTGTAAACAGATTTGGCTAGGATTATTTGATGAT
ASCRP3001808	25	26	23	32	37	73	50	50	47	149	219	127	hsa_circRNA_007936	hsa_circ_0007936	circBase	chr6	+	47471015	47472494	sense overlapping	NM_012120	CD2AP	AGACCACCACAATAGAGCAAATGTCATAGTAGAGCAGATACCTCAATAAATTGACTATAT
ASCRP3001809	56	117	78.5	107	38	416	314	355	99	790	912	772.5	hsa_circRNA_102628	hsa_circ_0052767	circBase	chr2	-	15601324	15651474	exonic	NM_015909	NBAS	AGACCACTTCTCCACATGAATATTCTGTTTTGCTGCCCGAAGCTTGACTTTTACTTGTTG
ASCRP3001810	115.5	127.5	150	196.5	146	1300	175.5	131	99	1246	1489	1249	hsa_circRNA_104414	hsa_circ_0080797	circBase	chr7	+	76062243	76062964	exonic	NM_007155	ZP3	AGACCAGAATGCCTCCCCTTATCACACCATCGTGGACTTCCATGGGCAGGGCAATGTGAG
ASCRP3001811	37	34	38	35	35.5	114	38.5	37	36	117	157	126.5	hsa_circRNA_401289		25242744	chr14	-	77812691	77818094	exonic	NM_213601	TMED8	AGACCAGGCCCAGGTCCTCAATGAGAGAATGAAGATCTAGAAAACAAGGATACCTCTTTA
ASCRP3001812	25	25	21	25.5	29	55	35.5	36	29	99	92	82	hsa_circRNA_012969	hsa_circ_0012969	circBase	chr1	+	76253181	76257256	exonic	NM_004582	RABGGTB	AGACCAGGTTCTGAATCCCATGCTGGGCAGGGCACTCCACAGAAGGATGTTATTATCAAG
ASCRP3001815	28	28	24	28	25	120	43	25	39	243	325.5	208	hsa_circRNA_103893	hsa_circ_0073030	circBase	chr5	-	74135898	74137504	exonic	NM_015566	FAM169A	AGACCCAGAAAATTCTTGCTCTCTTTGCACCTGAAGATTCACTGACAGAGGATGGCATTC
ASCRP3001816	31.5	33	28	30	27	91.5	71	60	62	208	179	178	hsa_circRNA_101947	hsa_circ_0041481	circBase	chr17	-	3853804	3854067	exonic	NM_005173	ATP2A3	AGACCCCAGAGCTGTGAACCAGGACAAGAAGAACATGCTGTTTTCTTGGGGGACAAAGTG
ASCRP3001817	24	24	25	26	26.5	87	29	21	21.5	171.5	137.5	110.5	hsa_circRNA_405108		25070500	chr12	+	132512561	132529498	exonic	NM_015409	EP400	AGACCCCTCAGGAGGAAAAGACCAGACTCTTGAAAGAGCGCCTGGATCAGATTTATTTAG
ASCRP3001818	22	26	24	35	29.5	41	42	74	37	136	156	139	hsa_circRNA_031655	hsa_circ_0031655	circBase	chr14	-	35564253	35568590	exonic	NM_017917	PPP2R3C	AGACCGTGTTTTCCAGGAGTGTCTCACTTATGATGGAGAAATGGATTTAGAAAACTACAT
ASCRP3001819	35	42	45	56	60	100	74.5	127	53	224	223	139.5	hsa_circRNA_104666	hsa_circ_0008496	circBase	chr8	-	101721360	101725409	exonic	NM_002568	PABPC1	AGACCTCATCGGCCTGCCTTAAGTGTGAAAGTAATGACTGATGAAAGTGGAAAATCCAAA
ASCRP3001820	24.5	24	22	23	31	158	85.5	420	269	470	1002	709	hsa_circRNA_100259	hsa_circ_0006677	circBase	chr1	-	67356836	67371058	exonic	NM_024763	WDR78	AGACCTGGAAGAACCATCCTATAAACGGGAAAGATTGACTAGTTTCACAGGAACAATGCC
ASCRP3001821	102	48.5	48	87	51.5	2300	325	907	690	4884	6598	4410	hsa_circRNA_101559	hsa_circ_0004374	circBase	chr15	-	65471271	65472542	exonic	NM_006660	CLPX	AGACCTTTGTATGTATTTCTGGTGGTCGCATTCATATGTCAGTTTTAGGAAGGCTTGGGA
ASCRP3001822	24	25	19	21	17	45	30	30	25	80.5	72	60.5	hsa_circRNA_001757	hsa_circ_0001757	circBase	chr7	-	140034228	140037149	sense overlapping	NM_032295	SLC37A3	AGACCTTTTCTTCTATATTTAGTGTCTCTGATCCGGGACAAGCTAGGATGGATGTGGGTT
ASCRP3001824	25	24	23	35	28	40	29.5	25	22.5	62	67	62	hsa_circRNA_046298	hsa_circ_0046298	circBase	chr17	-	79977183	79977257	exonic	NM_001271007	STRA13	AGACGCGCTCCGTGTGGACGTGGACCAGCTGGAGAAGAAGCAGCAGTCCGCGGCGTGCGG
ASCRP3001825	33	31	21.5	37.5	38	28	30	24	35	64	51.5	55	hsa_circRNA_013058	hsa_circ_0013058	circBase	chr1	-	85331067	85331842	exonic	uc001dkl.2	LPAR3	AGACGGTGATGACTGTCTTAGCTTCTTTAAATTTCTTTCTAGGATGTTCACTTCTCCACA
ASCRP3001826	25	26	22	25	28	72	52	150	85	203	314.5	157	hsa_circRNA_005863	hsa_circ_0005863	circBase	chr18	+	13099474	13103587	exonic	NM_032142	CEP192	AGACGTGAAATGGCATCTGTCATCTTTAGCGCCACCTTATGTCAAGGAGTAAACTACAAA
ASCRP3001827	34	27.5	22	29	30	70	85.5	98	101	167.5	233	190	hsa_circRNA_000860	hsa_circ_0000860	circBase	chr18	+	77455224	77457988	exonic	NM_004715	CTDP1	AGACGTTGATTCACACAACCGAGCAGCACTGTCAGCAGATGTCGAATAAAAGCGGTTCTG
ASCRP3001828	27	26	22	36	26	42.5	34	30	29	80	95	71	hsa_circRNA_104712	hsa_circ_0085782	circBase	chr8	+	142161717	142166069	exonic	NM_014957	DENND3	AGACGTTTATTCAGAGATCCTGACATGCATCCTGACGGAACAGCGGATCGTCTTCTTCTC
ASCRP3001829	35	30.5	24	28	24	51	43	33	34	78	78	88	hsa_circRNA_077032	hsa_circ_0077032	circBase	chr6	-	75823317	75875495	exonic	NM_004370	COL12A1	AGACTACAAACCACAAGTTGGAGTGATTGCAGATCAACGTGGTTCTCCTCAAGATTTAGT
ASCRP3001830	33.5	26	27	33	30	143	54.5	165	88	214	298	237.5	hsa_circRNA_025951	hsa_circ_0025951	circBase	chr12	+	46230371	46233279	exonic	NM_152641	ARID2	AGACTCATGTAGCATCTGCCCCAGTTTTGGAAAGACATCGTTGATGATAATGAAGTTCGT
ASCRP3001832	20	23	22	21	19	347	98	559	181	1072	1617	1204	hsa_circRNA_104491	hsa_circ_0003047	circBase	chr7	+	131060182	131130662	exonic	NM_013255	MKLN1	AGACTCTGGGATGGGAACATTTTAGTGGACAAACCAAATGACCAATCTTCAAGATGGTCT
ASCRP3001833	27.5	28	24	36	26.5	556.5	144.5	467	286	1364.5	2572	1643	hsa_circRNA_102962	hsa_circ_0001119	circBase	chr2	-	240929490	240954277	exonic	NM_004544	NDUFA10	AGACTGACCGTGTCTTACATCAGTTCAGAGAGGTGTGGACCACTACAACGAGGTGAAGAG
ASCRP3001834	25	22	22	25	26	31	35	41	33	54.5	56	52	hsa_circRNA_100704	hsa_circ_0000264	circBase	chr10	-	125798030	125806240	exonic	NM_014863	CHST15	AGACTGATTGTCATGCTCAGGGACCCTGTGGAGAGGAAATCTGGCATTTTTTAAAGTTTG
ASCRP3001835	21	21	20	23.5	19	185	143	728	537	566	2054.5	1143	hsa_circRNA_002153	hsa_circ_0000377	circBase	chr12	-	11273608	11276786	intronic	uc001qzf.2	PRB4	AGACTGCATCTGTTCATATGAGTGCTACTCATTGAGTTTCCTTGTGAGGAGATTGTGTGG
ASCRP3001836	49.5	51.5	47.5	31	23	69.5	392	3919.5	994	258	512.5	301	hsa_circRNA_100925	hsa_circ_0023940	circBase	chr11	-	85723323	85742653	exonic	NM_007166	PICALM	AGACTGTTTGCAGCATACAATGAAGGAATTATTAATTTGTTGGACTTAATTCAGTGCACA
ASCRP3001837	26.5	29	25	20	22	57.5	47	35	43	115	84.5	74.5	hsa_circRNA_407203		25070500	chr9	+	99220665	99220823	sense overlapping	NM_014282	HABP4	AGACTTCACAGCTGAGAAGTTTCCAGATGAAAAAAGCGGACTCCTAGAAGAGGGGAGCAG
ASCRP3001838	22	20	19	22.5	22	39	34	31	28.5	72.5	76	63.5	hsa_circRNA_400941		25242744	chr12	+	46211452	46215270	exonic	NM_152641	ARID2	AGACTTCGTTAAGATTATCTGCGTCAAAGTTATGGGCTGTCCATGGACTTTAATTCGCCA
ASCRP3001839	30	26	28	39	35	78	29.5	22.5	26.5	108	80	85.5	hsa_circRNA_406308		25070500	chr3	+	99394503	99396732	intronic	ENST00000273342	COL8A1	AGACTTGAATGGAGCTCACACGTTCACCAACTCACCCTTGAAGTCATCTCAAGAACAAAA
ASCRP3001840	52	40.5	35	49	67	901	54	25	39.5	3421	2681	2675.5	hsa_circRNA_400850		25242744	chr11	+	118890859	118892596	exonic	NM_016146	TRAPPC4	AGACTTTGCCCTCAAGAATCCATTCTATTCCTTAGAAATGCCTATCAGGCTCTTTGCCAT
ASCRP3001841	28	24	20	32	33	38	34	23	26	68	63	59	hsa_circRNA_001030	hsa_circ_0000333	circBase	chr11	+	68229037	68229117	intronic	ENST00000265636	PPP6R3	AGACTTTTTAATTATAGGTGAACGGGATGGGTCTTTGGATGTGTTTCCTGTTGAGGTCCT
ASCRP3001842	41	25	27	40.5	21	154	434	1225.5	671	602.5	1181.5	789	hsa_circRNA_406544		25070500	chr4	+	144464665	144465125	sense overlapping	NM_003601	SMARCA5	AGAGAAAAACAAAAGGCTTGTGGATCAGAATCTGAACAAAATTGGGAAAGATGAAATGCT
ASCRP3001844	19	23	20	22	26	31	29	25	24	61	82.5	70	hsa_circRNA_101043	hsa_circ_0025887	circBase	chr12	+	40696590	40697936	exonic	NM_198578	LRRK2	AGAGAAACTGCATCTTTCTCACAATAAACTGAAAGAGCTGCTATGCCTTTCTTGCCTCCT
ASCRP3001845	24.5	21	19.5	28	29	36	29	21.5	26	82	96	69	hsa_circRNA_401262		25242744	chr14	+	58727665	58737716	exonic	NM_002788	PSMA3	AGAGAAATATGCTAAGTTTCATGTTAGGGTCTTACAGTGTGAATGACGGTGCGCAACTCT
ASCRP3001846	50	50	46.5	71	65	160	110.5	121.5	54	211.5	200.5	130	hsa_circRNA_047040	hsa_circ_0047040	circBase	chr18	+	13387339	13438383	exonic	NM_181481	LDLRAD4	AGAGAACTGTCTCCTGGTGACCGAGCACCCGCCTCCGGGCATCTTCAACTTTTCAGAGGC
ASCRP3001848	27.5	26	22	31	26	184.5	85.5	205	190	307	531.5	355	hsa_circRNA_102511	hsa_circ_0050461	circBase	chr19	+	34699833	34706566	exonic	NM_015578	LSM14A	AGAGACAAGTAGCTGGAAGCTCTTTGACATCCTTTGGAACAGAAACATCAAACAGTGGTA
ASCRP3001849	23	21	18	23	23	42	31	47	30	90	126.5	111	hsa_circRNA_100220	hsa_circ_0005191	circBase	chr1	-	51253671	51267349	exonic	NM_007051	FAF1	AGAGACAGAAATGTTGATGTGGTACTTGAAGACACCTGTACTGTTGGCAGCTATCAATGG
ASCRP3001850	36	23	21	34	41	51	33	22.5	29	118	203	154	hsa_circRNA_004324	hsa_circ_0004324	circBase	chr1	-	68628715	68628997	intronic	ENST00000262348	WLS	AGAGACAGCAATTGGACAGAATTTGTGAAGGGTTTCATCACCTTAAATGGTTTTGAACCA
ASCRP3001851	21	25	21	19	21	36	31	29	23.5	60	63	53	hsa_circRNA_405926		25070500	chr2	-	86768239	86769435	intronic	NR_036454	CHMP3	AGAGACCTCAGAAGAGTCACACCTTAATAATAAGGATCAGGTCAATGAGTGGTCATTGAA
ASCRP3001852	57	49	39.5	50	52	66	60	69	52	119	123	102	hsa_circRNA_101470	hsa_circ_0034326	circBase	chr15	-	31947298	31981684	exonic	uc001zfs.1	OTUD7A	AGAGACCTGCTGGAAGAGTTCTCAGGCGCTGTGGTCTCACCTTCCACTGGGGCAACAATG
ASCRP3001853	28	25	21	26	24	226	57	70.5	63	355	658	508.5	hsa_circRNA_002789	hsa_circ_0002789	circBase	chr17	+	49340634	49346265	exonic	NM_016001	UTP18	AGAGACTACTAAGCGGAAAACATCTTCAGATGGTTCAAGAACATGAAGACTCGGGTGACT
ASCRP3001854	56	47.5	40	72	69	325	66	118.5	124.5	478.5	892.5	620	hsa_circRNA_104797	hsa_circ_0087293	circBase	chr9	+	82267504	82268990	exonic	NR_104239	TLE4	AGAGACTCCATCAAGCAGCAACAACTCCAGGCCCAGCATTTATCACATGGACATGGTCTC
ASCRP3001855	31	26	26	31	26	224	137.5	445	198.5	926	1279.5	778.5	hsa_circRNA_100309	hsa_circ_0004127	circBase	chr1	-	115005725	115007010	exonic	NM_015906	TRIM33	AGAGACTGTCAGCTATTGGAACACAAAGAACATAGTTGGTGTAATACGGTGCCCAGTATG
ASCRP3001856	77	47.5	46	79	112.5	742.5	259	730	647	1066.5	1948.5	1419	hsa_circRNA_404459		25070500	chr1	+	26594973	26596105	exonic	NM_022778	CEP85	AGAGAGAAGCAGAATTCTCCTCCGCTGGACATAGGTCAAAGGTCGTGATAAACATATCAA
ASCRP3001857	21	23.5	20	27	26	88.5	40	69.5	35	132	219	173	hsa_circRNA_405201		25070500	chr14	-	35269429	35272194	exonic	NM_013448	BAZ1A	AGAGAGGCTTAAAGTAGAAAGAGAAAAGGCATCATCTCTTTCAACGTATAAAATAGCAGA
ASCRP3001858	25	24	23	36	26	40	30	25	26	60	59	61	hsa_circRNA_405135		25070500	chr13	-	38624905	38647113	sense overlapping	NR_047500	LINC00571	AGAGAGTGAAGGGGTATGATGAGACCAAAAGACCAGGAGACAACTGCCAAAGGTTATTAT
ASCRP3001859	26	27	23	26	24	29	34	28	29	78	73	70	hsa_circRNA_103919	hsa_circ_0007003	circBase	chr5	+	96058342	96066564	exonic	NM_173060	CAST	AGAGAGTGTTGCTGGTATCACTGCAATATCTGGCAAGCCGGGTGACAAGGTGTCAGCTTC
ASCRP3001861	22	21	19	19	20	68	38.5	142.5	80	165	271.5	197	hsa_circRNA_103423	hsa_circ_0005605	circBase	chr3	+	100013930	100016889	exonic	NM_018309	TBC1D23	AGAGATCCTTCAAGCGAATCAGCTACAAGGGCTTGGAAGTCTTTTTGCATGTTACTGTTC
ASCRP3001862	24	20	19	20	24.5	61	28	22	22	164	260	198	hsa_circRNA_101195	hsa_circ_0029104	circBase	chr12	+	123035865	123042236	exonic	NM_014708	KNTC1	AGAGATGCTGAATTATGCCAAAACCAGGGATACCATATACCTTTTAGAAGGAGTTTGCAA
ASCRP3001863	119	91	143	221.5	186	618	76	95	97	871	1090	884	hsa_circRNA_100164	hsa_circ_0011545	circBase	chr1	+	35846859	35865177	exonic	NM_005095	ZMYM4	AGAGATGGCTTCCCCCAACCCAGACGAAGAAGACATTTTAAATCCAAAGGATGTGATCAG
ASCRP3001864	34	45	51	43.5	45	67	45	50	36	158	151	99	hsa_circRNA_103465	hsa_circ_0067231	circBase	chr3	-	128356641	128363826	exonic	NM_002950	RPN1	AGAGATGTGCCTGCCTATAGTCAGGTAAAGGGAGAAGATGAGGAAGAGAACAATTTGGAA
ASCRP3001865	24.5	21	19	23	22	261	38	97	71	564.5	1081	752	hsa_circRNA_000600	hsa_circ_0000600	circBase	chr15	-	50862083	50867986	exonic	NM_017672	TRPM7	AGAGCAAAACATCACTGTAATTCTTGCTGTAGAAAGCTTAAACTTCCAGCTGTGGAAAGA
ASCRP3001866	31.5	35	36	32	31.5	40	44	49.5	73	108	132	95	hsa_circRNA_001430	hsa_circ_0001516	circBase	chr5	+	96437462	96438798	exonic	ENST00000509481	CTD-2215E18.1	AGAGCAGACTTCACACATAGGAGACGGGTTTGGCTCTGTGATTCATCAGAAATAAGAAAA
ASCRP3001867	74	42	38	92	40	2641	834	3705	1367	8453	19328	11386	hsa_circRNA_101232	hsa_circ_0006732	circBase	chr13	-	21987790	21999817	exonic	NM_153251	ZDHHC20	AGAGCAGCAAGAGCTTTACCTATCTATACCACATCAGCTTCAAAAATTACTATTTTTGGA
ASCRP3001869	23	22	19	25.5	24	46	29	38	41	93	153	119	hsa_circRNA_406351		25070500	chr3	-	129579782	129599402	exonic	ENST00000509440	TMCC1	AGAGCATGCTTGTTCAAATCCTGAATAGTCCACACATTCCTAGGTATTAATCTCTGGAGA
ASCRP3001870	48	66	75	52	46	214	62	59	54.5	354.5	400.5	306	hsa_circRNA_407284		25070500	chrX	+	47028897	47030400	intronic	ENST00000329236	RBM10	AGAGCCAGCGGCCAGCTCCTAGGCCTGCCCAGACTGACTGCCCGTCTGGTGTGAGGAGGG
ASCRP3001871	42	27	25.5	38	42.5	70.5	40	31	31	159.5	204	175	hsa_circRNA_402906		25242744	chr3	+	88202379	88202621	exonic	NM_173824	C3orf38	AGAGCCAGTTACAAAGACAGAGGACATCCACCTATTTCAACAGATGCTGTTCATGCAATA
ASCRP3001872	50	64	60	38	36.5	365.5	120	675	223.5	740	696	556	hsa_circRNA_005801	hsa_circ_0005801	circBase	chr10	-	98303832	98325183	exonic	NM_020123	TM9SF3	AGAGCCATTCCTTTTGGAACAATGATGATGTGATGCCAGCCACTTACTGTGAAATTGATT
ASCRP3001873	28	24	24	34	40.5	63	30	23	23	120	100.5	69	hsa_circRNA_000519	hsa_circ_0000262	circBase	chr10	-	121048086	121048266	antisense	NM_005308	GRK5	AGAGCCCACCATGTTGCTGCAGCAGTGACACAGTGAGGTACAGCAGAGATGAGGAAGAGC
ASCRP3001874	20	21	20	20	23.5	45.5	26	22	21	86	104	94	hsa_circRNA_007416	hsa_circ_0007416	circBase	chr9	-	95618092	95618600	exonic	NM_031486	ZNF484	AGAGCCGTCCAGGAATCAGTGTCATTCAAGGACGTAACTGTAGACTTCAGTAGGGATGAG
ASCRP3001875	260.5	56	47.5	138	27.5	990	1155	2929.5	3106.5	3977	5323	3812.5	hsa_circRNA_103149	hsa_circ_0002903	circBase	chr21	+	47768925	47769734	exonic	NM_006031	PCNT	AGAGCGAGAAAGAAAAACAGCTGGAGACCCTGAAGGAAGATTGGGAATCTGAAAAAGATT
ASCRP3001877	260.5	478	308	180	122.5	6263	341.5	408.5	295.5	8023	6060	5707	hsa_circRNA_083776	hsa_circ_0083776	circBase	chr8	+	27514298	27530537	exonic	NM_016240	SCARA3	AGAGCTATTTCCAGGAGTTTTTCAGAAAAGTGGACTCTCTCTCCGAAGACATCTCCTTGA
ASCRP3001878	43	26.5	24	54	51.5	206.5	80	153	90	376	596	434	hsa_circRNA_026787	hsa_circ_0026787	circBase	chr12	-	56182858	56189860	exonic	NM_033082	SARNP	AGAGCTCAAAGATTTGGTTTGAATGTCTCTTCAATCTCCAGAAAGGGCAGCAGAGAAGAA
ASCRP3001879	20	24	20	22	21	60	32	29	21	148	142	109	hsa_circRNA_104559	hsa_circ_0008752	circBase	chr8	-	17092224	17094882	exonic	NM_013354	CNOT7	AGAGCTGCAAAAATCTCAAAGGAGGACATGTATGCCCAGGACTCTATAGAGCTACTAACA
ASCRP3001880	25	42.5	78.5	28	25	132.5	51	149.5	53	131	112	106	hsa_circRNA_406796		25070500	chr6	+	74175931	74202075	exonic	NM_012123	MTO1	AGAGCTGGCTGAAAGACTGAAAATAGAAGGTCAGATGTCATGTAATCCTTCCTTTGGTGG
ASCRP3001881	21.5	20.5	20	21.5	21	58	28	27.5	22	141	149	121	hsa_circRNA_083946	hsa_circ_0083946	circBase	chr8	-	37732032	37735069	exonic	NM_025151	RAB11FIP1	AGAGCTGTCAAGCCCCGGTGGTATAAGTTGAAATCCAAACCAGGAAAGAAGGACAAGGAG
ASCRP3001882	35	29	23	78	78	91.5	49	152	115	203	285	208	hsa_circRNA_100605	hsa_circ_0006151	circBase	chr10	-	70227879	70229920	exonic	NR_102264	DNA2	AGAGCTGTCCTGAGTGAAACTTTTAGGATTTCAGAAGAAAGTGGTAGCTTCCTTTCCAAG
ASCRP3001883	25	27	24	24	24	63	53	224	149	220	291	168.5	hsa_circRNA_000843	hsa_circ_0000843	circBase	chr18	+	39595439	39613921	exonic	NM_002647	PIK3C3	AGAGGAATAATTCCGGAAACAGCTACACTGTTTAAACTCCCAAATTATAACCAGCCCCCT
ASCRP3001884	57.5	128.5	208.5	357	298	58	247.5	601	172	196	197	115	hsa_circRNA_102602	hsa_circ_0052318	circBase	chr19	-	58436990	58439415	exonic	NM_133460	ZNF418	AGAGGAATTGGTTGTTGGTGTGGATCAGAAGATGAGGAGGCACCTTCTAAGAAGAGCATT
ASCRP3001885	48	46	42.5	44.5	41	45	60	69.5	56	71	72.5	68	hsa_circRNA_101643	hsa_circ_0036750	circBase	chr15	-	90446447	90454051	exonic	NM_182616	ARPIN	AGAGGACGAGGAGTGGGGGAAATGGTGTCCTGCTGGAGGGAGAACTGATCGATGTATCTC
ASCRP3001886	22	24	22	21	23	43	35	54.5	44	86	105	77.5	hsa_circRNA_007344	hsa_circ_0007344	circBase	chr2	-	10740978	10747437	exonic	NM_024894	NOL10	AGAGGAGAAGCAGAAATCTACATGGAAAAAGAAAGTTAAGGTTTTGGGTCCTGCTCCTCG
ASCRP3001888	27	23	23	30	26.5	107	35	56	42	102	194.5	146	hsa_circRNA_104126	hsa_circ_0076798	circBase	chr6	-	53365044	53365148	exonic	NM_001498	GCLC	AGAGGAGTACACCCTCATGAGCATAGACACCATCATCAATGGGAAGGTGGCAATGCAGTG
ASCRP3001889	30	26	25.5	29	26	118.5	70	127	94.5	240	482.5	359.5	hsa_circRNA_007992	hsa_circ_0007992	circBase	chr7	+	66262360	66270383	exonic	NM_014504	RABGEF1	AGAGGATGGCTACTATTTCACCAATCTGTGCCTCCAGAAAGAGTCGAGAAGATAATGGAT
ASCRP3001890	31	25	19	34.5	29	466	140	893	496.5	1030	2129	1579	hsa_circRNA_105012	hsa_circ_0001934	circBase	chrX	+	77270158	77275895	exonic	NM_000052	ATP7A	AGAGGCACAAACATCAAAGGGCAAAACATCAGAGGCTCTTGCAAAGTTAATTTCACTACA
ASCRP3001891	40	27	23	43	34	150.5	78	214	173.5	286	506	374	hsa_circRNA_403764		25242744	chr7	-	6022454	6042267	exonic	NM_000535	PMS2	AGAGGCTCATAGCCGATGTCACCATTTCTACCTGCCACGCATCGGCGAAGGTTGGAACTC
ASCRP3001892	31	28	23.5	22	25	93	42	56	52	274	450	231.5	hsa_circRNA_006036	hsa_circ_0006036	circBase	chr7	+	128231903	128249633	exonic	ENST00000479267	RP11-274B21.1	AGAGGGAGGGAAGAATAGATGATTTATTAAGATGACGAGTAGCACAGCCCCTCTATGGTT
ASCRP3001893	90	80	53.5	117	122	379	137	112	83	447	456	400	hsa_circRNA_104148	hsa_circ_0008236	circBase	chr6	-	83667030	83754378	exonic	NM_198920	UBE3D	AGAGTAATGCCAATCTGCCTTCATCCCTTCGCCGTGTGAATTCCTTTCAGGAAGCTCCTC
ASCRP3001894	19	26	23	24.5	25	57	34	38	35	255	332	234	hsa_circRNA_403022		25242744	chr3	+	178921331	178922376	exonic	NM_006218	PIK3CA	AGAGTACCTTGTTCCAATCCCAGTATATAAGAAGCTGTATAATGCTTGGGAGGATGCCCA
ASCRP3001895	33	42	37	26.5	32	42	40	28	39	66	91	72	hsa_circRNA_403482		25242744	chr5	-	150076352	150078193	exonic	NM_018047	RBM22	AGAGTACTATACACAGAATATGGAGAGAGAGATCTGTGCCAGGCCATTCACAGTGTTTCG
ASCRP3001896	130.5	69	59	184	66	850	928	2323	1863	1154	2819	1273	hsa_circRNA_103619	hsa_circ_0001400	circBase	chr4	-	37633006	37640126	exonic	NM_001085399	RELL1	AGAGTAGCAGCGAATGCTGATGTCTTAAAGGCGATGGTAGCAGATAACAGCCTGTATGAT
ASCRP3001897	22	28	20	22	19	63	43.5	59	77.5	199.5	212	198.5	hsa_circRNA_003357	hsa_circ_0003357	circBase	chr10	+	111883774	111890244	exonic	NM_001121	ADD3	AGAGTATAAGAGGACAATCGAACGTAAACAACAAGGCCTAGAAGGGGTATAGAACAGGCT
ASCRP3001898	27	26	20	24	28	90	34	38	35	97	153.5	122.5	hsa_circRNA_406315		25070500	chr3	-	101371339	101384652	exonic	NM_014415	ZBTB11	AGAGTATAGGAGACACATGAACAACCATGAAGGTTTTTGTAAGGCCAGCTTCCTTCCTTT
ASCRP3001899	22	24	20	26.5	27	46	31	32	31	109	156	111.5	hsa_circRNA_000637	hsa_circ_0000637	circBase	chr15	+	76182775	76183355	exonic	NM_173469	UBE2Q2	AGAGTGCAGTTTGGAGCAAATAAGGTATGTATTGGGTGGAGGAGCATTATGTATGGAACT
ASCRP3001900	20	19	19	20.5	20.5	37	33	51	46	114	132	109.5	hsa_circRNA_403631		25242744	chr6	-	70451680	70462248	exonic	NM_018368	LMBRD1	AGAGTGGGAAAAAGTGAAGTCCCTATTTGAAGAACTTGGAAGTAGTCCTTTATATTCTGT
ASCRP3001903	21	23	20	26	25	52.5	38.5	82	50.5	78	82	61	hsa_circRNA_403179		25242744	chr4	+	88977237	88989213	exonic	NM_000297	PKD2	AGAGTTTCAAGTCTCTTCAAATTCATCAATTTTAACAGGACCATGAGCCAGCTCTCGACA
ASCRP3001904	26	25	21	59	87	59	40	159	77	101	133.5	114	hsa_circRNA_029865	hsa_circ_0029865	circBase	chr13	+	28840851	28869475	exonic	NM_175854	PAN3	AGATAAATTTCAGTTCCTACAGAGGTTGACAGCTACCATAGCCTATTCCCTCTAGAACCA
ASCRP3001905	50	57	58	36	33	345.5	65	46	45.5	187	306	274	hsa_circRNA_062556	hsa_circ_0062556	circBase	chr22	-	24108020	24108462	exonic	NM_213720	CHCHD10	AGATAACCCAAGACACAAATGTGCAATTAAAAGTTTATTTTAGACCACAGCCCCCACCCC
ASCRP3001906	22	21	23	25	27	47.5	30	24	23	75.5	83	73	hsa_circRNA_001094	hsa_circ_0001094	circBase	chr2	-	203690417	203693739	exonic	NM_138468	ICA1L	AGATAATCGAGAAATACCAGCTAAGACTCAATGTCACTCCATGGATTCCTTTGGGCAACC
ASCRP3001908	19.5	20	19	19	18	43	32	46	29	82.5	78	71	hsa_circRNA_406214		25070500	chr3	+	3178943	3186394	exonic	NM_182916	TRNT1	AGATACTTCAGAATTATTTGTCAAAGAGAATCACGAATTAAGAATAGCAGGAGGAGCAGT
ASCRP3001909	21	23	18	18	19	78	76	121	66	134	217	147	hsa_circRNA_406215		25070500	chr3	+	3182193	3186394	exonic	NM_182916	TRNT1	AGATACTTCAGCTTCATGAAGAAAATTTTGAGATTACTACACTACGGATTGATGTCACCA
ASCRP3001910	29	22	22	38	37	38.5	30	21	21	69	52	49.5	hsa_circRNA_404571		25070500	chr1	+	118485168	118485970	intronic	uc001ehi.2	WDR3	AGATAGAGGACATTGTAAAGCCTTTTCCTGGAAAAAGTAAACCTTTGAGTAAAAATAAAT
ASCRP3001911	57	60	55	71.5	59	310	71.5	274	118	549	465	359	hsa_circRNA_404910		25070500	chr11	+	76234198	76239510	exonic	NM_020193	C11orf30	AGATAGTAGTTCCTCTTCTACAGAGTCCTCCCAGAGTTCCCAAGGAACGACTACCAAAAT
ASCRP3001912	35	32	29	34	25.5	1930.5	111	804	649	4006	7571	5496	hsa_circRNA_104809	hsa_circ_0001867	circBase	chr9	-	86294689	86297981	exonic	NM_013438	UBQLN1	AGATATAATGAGACAAGCCTCAGGATCATTCAGCTCAGCAAACAAATACAGCTGGAAGCA
ASCRP3001914	40.5	25.5	23	63	38	1360	228	1156	853.5	3911	6415	4890.5	hsa_circRNA_101243	hsa_circ_0029855	circBase	chr13	+	28834583	28835595	exonic	NM_175854	PAN3	AGATATGCCAGGTGTTTCCAAACTATCATATTTATCCTCCAACTGCACCTCACGTTGCTT
ASCRP3001915	22	23	22	21	21	45	31	35	26	96.5	107	83	hsa_circRNA_100315	hsa_circ_0013752	circBase	chr1	-	118429198	118461358	exonic	NM_017686	GDAP2	AGATATGGACAAGGAAAGGAGATGTGGCATTACTGAACTGTACAGCCATTGTGAATACCA
ASCRP3001916	216	364	213.5	311	223	4049.5	348.5	709	228.5	2727	2944	2271	hsa_circRNA_104507	hsa_circ_0001756	circBase	chr7	-	139415730	139416814	exonic	NM_022740	HIPK2	AGATATTACAGGTATGGCCTCACATGTGCAAGTTTTCTCCCCTCACACCCTTCAATCAAG
ASCRP3001917	22	20	18	18	19	35.5	38	62	44	119.5	114	84	hsa_circRNA_405170		25070500	chr13	-	96622365	96648389	exonic	NM_020121	UGGT2	AGATATTCGACATTCTTCTATAATGCTGTGACTAATACTACTGTAGAGGATGAGACTGAA
ASCRP3001918	31	28	25	37	26	83	199	537	157	195	403	274	hsa_circRNA_092363	hsa_circ_0000028	circBase	chr1	-	22041881	22048257	exonic	NM_032236	USP48	AGATATTCTGTGTCCACATGTGAAAGCCCTGTGTAAGGAATGTGTAGTAGAACGTTGTCG
ASCRP3001919	25	26	20	22.5	23	57	34	22	25	85.5	101	87	hsa_circRNA_069922	hsa_circ_0069922	circBase	chr4	+	72102292	72121116	exonic	NM_001098484	SLC4A4	AGATATTGAAAATGCTGATGAATCCAGCAGCAGCATCCTAAAACCTCTCAGATGGAGGAT
ASCRP3001920	27	30	22	25	21	115	42	34	37	118	199.5	149	hsa_circRNA_055879	hsa_circ_0055879	circBase	chr2	+	101622420	101622885	exonic	NM_000993	RPL31	AGATCAAATAAAGTTATAAAATTGCCTTCAGAATGTGCCATACCGAATCCGTGTGCGGCT
ASCRP3001922	56	29	28	55	20.5	625.5	363	647	726	1544	2727.5	1712	hsa_circRNA_008304	hsa_circ_0008304	circBase	chr3	-	141811902	141820683	exonic	NM_001178138	TFDP2	AGATCAGAATCTCAGTCCAACAAAAGGTTGTTCTTTTAAAGAATTATTGAAGACGAAGGT
ASCRP3001925	25	39	44.5	34	33	34	49	97	40	72	90	78	hsa_circRNA_406341		25070500	chr3	-	125170148	125176209	exonic	NM_003794	SNX4	AGATCAGTATGTGCAAAAAGGGCTGTGTGCAGGAAACATGAACTTATGCAGTATGACTTG
ASCRP3001927	20	21	21	20	19	57	30	44.5	29	426	548.5	446	hsa_circRNA_407116		25070500	chr8	+	109462051	109468159	exonic	NM_014673	EMC2	AGATCCAACTAACACTAAATGAGAGATAAAATGAGAAAATGGAGAGAAGAAAACTCAAGA
ASCRP3001928	30	27	24	30	29	99	40	41	38.5	108	201	146.5	hsa_circRNA_045989	hsa_circ_0045989	circBase	chr17	-	78115117	78115647	exonic	NM_014740	EIF4A3	AGATCCAGAAGGTCTCAGTCCGGCACAGGAAAAACAGCCACCTTCAGTATCTCAGTCCTC
ASCRP3001929	30.5	25.5	21.5	32	36	34.5	31	27	34	59	61	56.5	hsa_circRNA_052247	hsa_circ_0052247	circBase	chr19	+	55997027	55998935	exonic	NM_020378	NAT14	AGATCCGTCTGGTTTTTTACACCGTTTGTTAATAAAGCCTGAAACCGCTGGTGCACGACG
ASCRP3001930	21	22.5	21	22	21	31	28	56	33	65	71	61.5	hsa_circRNA_030123	hsa_circ_0030123	circBase	chr13	-	42481721	42524149	exonic	NM_015058	VWA8	AGATCCGTGCAGGCACAGCCTTTTACATTGATCAGGTGATACAGTTAATATTGGAGATGT
ASCRP3001931	32	26	26	51	51	45.5	46	83	60.5	139	137	130.5	hsa_circRNA_001738	hsa_circ_0001738	circBase	chr7	-	107002477	107053077	exonic	NM_006348	COG5	AGATCCTGTTTCTCACATTTGTTTCATTGAAGAAATAGTTAAGATTATCTTTCTCAAGGA
ASCRP3001932	47	29	27	39	38.5	88	107	700	291	230	286	228	hsa_circRNA_103000	hsa_circ_0006704	circBase	chr20	-	17933230	17934761	exonic	NM_014426	SNX5	AGATCGCAACTTTCATGTTTTCCTGGAATATGATCAGGATATTCCACCTGCTCCTACGAA
ASCRP3001934	46	48	35	26.5	29	657	42	68.5	81	1051	1739	1257	hsa_circRNA_002919	hsa_circ_0002919	circBase	chr5	+	115202366	115205825	exonic	NM_001284	AP3S1	AGATCTAATTCAAAGTGAAGATACACAACAGCAAATCATCAGGGAGACTTTCCATTTGGT
ASCRP3001936	23	21	18	24	23	173.5	43	90	61	654	1475	928	hsa_circRNA_403140		25242744	chr4	+	71816416	71824757	exonic	NM_001244766	MOB1B	AGATCTCAATGAATGGGTTGCAGTTAACAGAGTTCTCAGCCTGAAGTTGACTGGAACTTT
ASCRP3001937	54	49	41	91	74.5	1184	73	69	54	822	1076	797	hsa_circRNA_405133		25070500	chr13	+	36939636	36943737	sense overlapping	NR_045180	SPG20-AS1	AGATCTCTCTGCCCAGGCTTGGAAATACATAAGGATCAGATTACTAGGAAAGCCAAGTCT
ASCRP3001939	28.5	28.5	22	42	43	128.5	45	66.5	47	168	214	182	hsa_circRNA_023812	hsa_circ_0023812	circBase	chr11	-	78180292	78204241	exonic	NM_024678	NARS2	AGATCTTAAAGCAAGCATCCCAGAACTTCACCTTTACCCCAGAGAGCTTTTACTCAAGTG
ASCRP3001940	22.5	24	20	24	27.5	44	29	29	25	72	73.5	67	hsa_circRNA_403989		25242744	chr8	-	10677702	10692285	exonic	NM_017884	PINX1	AGATCTTGACTGCATTTTTGGGAAAAGACAGAGTAAGAAGACTCCCGAGGTCGGCGGAAG
ASCRP3001941	157	44	46.5	243	30	2793.5	1385	5930	2071	6212	9352	6039.5	hsa_circRNA_104532	hsa_circ_0001772	circBase	chr7	+	155465560	155473602	exonic	NM_053043	RBM33	AGATGAATTTACATGAACTTGAAGATGATTTACTTGGAGAAGATTTGCTATCTGGCAAAA
ASCRP3001943	39	31	30	30	36	261	51	42	44	318.5	559	381	hsa_circRNA_043415	hsa_circ_0043415	circBase	chr17	-	37571278	37576171	exonic	NM_004774	MED1	AGATGACTTCATTGCCAAAGTTGTTCAAAGGCTCTTCCTGGTCAGCAGCACTGCTATTTC
ASCRP3001944	30	26	27	29	26	80	35.5	27	40	139.5	175	141	hsa_circRNA_008450	hsa_circ_0008450	circBase	chr16	+	66642211	66643906	exonic	NM_144601	CMTM3	AGATGAGACCACAGCCCACAAGACAGAAGGGTCTCTCATTCATCACTTTTATCTGCTATG
ASCRP3001945	22	24	19	25	25	33	32.5	83	43	79.5	71	76.5	hsa_circRNA_013573	hsa_circ_0013573	circBase	chr1	+	113633939	113662145	exonic	NM_014813	LRIG2	AGATGAGCGGTGGGATTTCAGTCATAATCGGTTGTCTAACTGGAACATCAGCTTGGAATC
ASCRP3001946	31	25	22	27	28.5	267.5	48	184.5	71	392.5	489	390	hsa_circRNA_103236	hsa_circ_0063481	circBase	chr22	+	41521867	41542820	exonic	NM_001429	EP300	AGATGATGCCTCGAATAACTCCACAATCTGATGGGAATGATGAACAACCCCAATCCTTAT
ASCRP3001947	26	28	23	29	44	91	36	25	24	72	69	65	hsa_circRNA_001805	hsa_circ_0001659	circBase	chr6	+	157431605	157435966	intronic	ENST00000414678	ARID1B	AGATGATGGAGAGTGAGAGATGATGCAACCTACTTCTCTCTAGAGGTAGTCAGATGCCTC
ASCRP3001948	26	22	20	22	22	41	35	29	28.5	83	96.5	80	hsa_circRNA_406589		25070500	chr5	+	14678789	14693203	sense overlapping	NM_138348	OTULIN	AGATGCACAGAACCGAGATTAAGCGTAGCTCCTGAAATGGATATCATGGACTACTGCAAA
ASCRP3001949	38	24	21	47	26.5	672	217	1104	663	2118	4704.5	2835	hsa_circRNA_103435	hsa_circ_0001329	circBase	chr3	+	119219541	119222868	exonic	NM_016589	TIMMDC1	AGATGCCTTAAGCCATTTTGTAATTGCAGGAGTGAACAGCAGAGAATTTCAAAGGACCTT
ASCRP3001950	26	23	20	29	24	247	92	384.5	225	479	890.5	599	hsa_circRNA_104707	hsa_circ_0003221	circBase	chr8	-	141856358	141900868	exonic	NM_005607	PTK2	AGATGCGGGGCAATGCACTAGAAAAGAAGTCTAACTATGAAGTATTAGAAATATGACAGA
ASCRP3001951	44	29	27	63	42	1935	189	445	465	1949	4563	2888	hsa_circRNA_104361	hsa_circ_0009092	circBase	chr7	+	44739739	44741214	exonic	NM_002541	OGDH	AGATGCTTCCAGGACCTTAAAGAAGCCAACTTCGACATCAATCAGCTATATGACTGCAAT
ASCRP3001952	19	21	17	20	19	37.5	34.5	135	57	89	88	77	hsa_circRNA_400738		25242744	chr11	+	34978930	35013926	exonic	NM_003477	PDHX	AGATGGAAAATTGTTGCCTGAAGAATACCAAGGAGGATCTTTTAGGTTGAAGAAGGAAGT
ASCRP3001953	23	21	19	21.5	21	42	32.5	34.5	23	91	88	70	hsa_circRNA_102754	hsa_circ_0055054	circBase	chr2	-	69575302	69577315	exonic	NM_002056	GFPT1	AGATGGAACTCCAGCAGATCATGAAGGGCAAAGACAAGAAAGGAAGCTGCAATCTCTCTC
ASCRP3001954	43	37.5	34	29	27	118.5	50	36	73	158	227.5	175	hsa_circRNA_104574	hsa_circ_0083756	circBase	chr8	-	27151596	27151827	exonic	NM_171982	TRIM35	AGATGGAGATGAAGGAGGACGACGTTTCTTTTCTCATGGTGGAGGCTGCATGGCTGGAAG
ASCRP3001957	21	20	18	21	20	30.5	29	45	43.5	70	68	63	hsa_circRNA_103128	hsa_circ_0061694	circBase	chr21	+	38792600	38868560	exonic	NM_101395	DYRK1A	AGATGGCACTTGGAACTTAAAGAAGACCAAAGATGGAAAACGGTGTTATAGTTTTGCCGC
ASCRP3001958	20	19	18	20	21	56	34	57	32	95	137	108.5	hsa_circRNA_027776	hsa_circ_0027776	circBase	chr12	+	95887831	95897937	exonic	NM_006838	METAP2	AGATGGGAAGACATATCAAGGCGAACAGCTGCTTGGAGAACTACAAGTGAAGAAAAGAAA
ASCRP3001959	50	33	30.5	33	26	53	198.5	1109	230	145.5	217	138	hsa_circRNA_005322	hsa_circ_0005322	circBase	chr1	-	227381486	227400920	exonic	NM_003607	CDC42BPA	AGATGGTGATAGCAATTGACTCAGTTCATCAGCTACATTATGTACACAGGTTGCTGTAGT
ASCRP3001960	40	23	21	39.5	37	54	35	30.5	34	100	135	112	hsa_circRNA_104753	hsa_circ_0005405	circBase	chr9	+	33351557	33352717	exonic	NM_002504	NFX1	AGATGGTGATTTGCTCTGAAGCATCTAGTACTTATCAAAGTTTCGGAGCAACATCCCCTG
ASCRP3001962	22	20	15	20	18.5	43	29	24	22	63	130	97	hsa_circRNA_092471	hsa_circ_0000943	circBase	chr19	+	47421744	47440665	sense overlapping	NM_004491	ARHGAP35	AGATGTATTGAGTACATTGAAGCCACAGGAAGAAATGTTGGCTATTTGGCGATGAGAGGT
ASCRP3001963	47.5	66	59.5	63	52	171	91	68	33	243.5	265.5	205	hsa_circRNA_100848	hsa_circ_0022812	circBase	chr11	+	65055186	65063461	exonic	NM_002689	POLA2	AGATGTCCTCATCATCCCGTCAGAGCTGAGGTACTTCGTGAAGACTTTGAGCAAAGCATG
ASCRP3001964	123	234	136.5	78	73	870.5	316	560	699	1337	3240	2244	hsa_circRNA_074183	hsa_circ_0074183	circBase	chr5	+	138611809	138614818	exonic	NM_199189	MATR3	AGATGTCTGACAGCCCTGTGTGACACCAAGATAAGTAACAGAGGCTGGCTGTGGCAGATG
ASCRP3001965	34	24	21	33	40	38	38	62	59	78	96.5	79	hsa_circRNA_002905	hsa_circ_0002905	circBase	chr2	+	203834641	203847164	exonic	NM_024744	CARF	AGATGTGCAGACTATTCCAATACAGATTATAGACAACCACTCAGCTCTTAGATTTACATT
ASCRP3001966	33	21	21.5	35	26	72	89	177	156	212	225	196	hsa_circRNA_004649	hsa_circ_0004649	circBase	chr1	-	243858892	244006584	exonic	NM_005465	AKT3	AGATGTGGATTTACCTTATCCCCTCAACAACTTTTCAGTGGCAAGCTGAGTCATCACTAG
ASCRP3001967	41	36	32	53.5	34	606	406	2191.5	1173.5	2170	5065	3743	hsa_circRNA_092573	hsa_circ_0002117	circBase	chr7	+	131071878	131073731	exonic	NM_013255	MKLN1	AGATGTTCCCTTGTCGATTCATTAAAATAGTACTTGATTCTAAAGCTCGAAAGGCCTGCT
ASCRP3001969	32	24	21	28.5	26	182	116	477	217	432	988	659	hsa_circRNA_010048	hsa_circ_0010048	circBase	chr1	+	15953163	15970145	exonic	NM_032341	DDI2	AGATTATTGGAAGGGTACATCTAGATCGTCTATGCGGAAAGACCTCTCACAGACAACCAC
ASCRP3001970	31	66	57.5	30	29	34	74	114	59	72.5	54	51	hsa_circRNA_000864	hsa_circ_0000662	circBase	chr16	-	398402	398484	intronic	ENST00000262320	AXIN1	AGATTCCACATAGACAAGGGACAGCAGTGTGGACTGTTGGCTGGTAAAGTGTGTGCAATG
ASCRP3001971	55.5	45	53.5	73.5	70.5	442	53	125	53	455	626	455.5	hsa_circRNA_030101	hsa_circ_0030101	circBase	chr13	-	42335263	42407667	exonic	NM_015058	VWA8	AGATTCCTTCACCTGCTCAACAGACCCCGAGAATATATTCAGCTACACAGGATATGACAG
ASCRP3001972	23	42	36	22	21.5	39	43	54	33.5	75	71	60	hsa_circRNA_406799		25070500	chr6	-	75974946	75982671	sense overlapping	NM_018247	TMEM30A	AGATTCTAGTGCTTTGCTTGATTCACTGGTCTATGTGGGAGTGTCTGATTGCTGAGTCTA
ASCRP3001975	24	29	27.5	23	26	60	31.5	34	31	89	114	102	hsa_circRNA_007832	hsa_circ_0007832	circBase	chr17	-	13936868	13937733	intronic	ENST00000602743	COX10-AS1	AGATTCTTCTGCCTGATAAAACAGGAGTGTGAGTATGGCATCAGGATGATTTGACTGCAA
ASCRP3001976	35.5	27.5	28	32	27	89	321.5	1470	437	233	78	146	hsa_circRNA_103393	hsa_circ_0001313	circBase	chr3	+	56626997	56628056	exonic	NR_024460	CCDC66	AGATTGAGGAACGAGACAGACGACGACAAAAACAATTAGAGCATCAGGAAACAGTACTGC
ASCRP3001977	25	21	20	21	21	43	30	54	32.5	93	99	79	hsa_circRNA_000555	hsa_circ_0000555	circBase	chr14	+	75247107	75269379	exonic	NM_019589	YLPM1	AGATTGCAGAATACATCTTCAAGACCTGGAATGTATCCGTCTGAGGACCCAGAAGAAGAT
ASCRP3001978	24	26	23	21	26	253	50	65	91	834	1807.5	953	hsa_circRNA_103968	hsa_circ_0007452	circBase	chr5	+	138994281	139003046	exonic	NM_003339	UBE2D2	AGATTGCTCGGATCTACAAAACAGATAGAGAAAAAATGACAGTCCCTATCAGGGTGGAGT
ASCRP3001979	116	41	40	140.5	67	1721	470	902	960	4732	7423	3631.5	hsa_circRNA_101484	hsa_circ_0007489	circBase	chr15	-	41361767	41362745	exonic	NM_017553	INO80	AGATTTGTTCCTAAATTTAAGGGTATTAATGGCATTCTTGCTGATGAAATGGGCCTTGGT
ASCRP3001980	19	21	19	22	19	35	28	37	32.5	82	120	96	hsa_circRNA_105032	hsa_circ_0091585	circBase	chrX	+	133607388	133609394	exonic	NM_000194	HPRT1	AGATTTTATCAGACTGAAGAGCTATTGTATTAGTGATGATGAACCAGGTTATGACCTTGA
ASCRP3001981	45.5	36	37	57	52	123	64.5	243.5	103	148.5	429	253	hsa_circRNA_404711		25070500	chr10	+	4872866	4951798	sense overlapping	NR_073125	AKR1E2	AGCAAAAATTCTGCATCATTTTGGTGGCGTGTACAGGGACATGAGGAAGGGCTTCTCCAG
ASCRP3001982	27.5	28	28	25	26.5	67	39	53	29	98	98	87	hsa_circRNA_000569	hsa_circ_0000420	circBase	chr12	-	72050664	72054207	sense overlapping	NM_144982	ZFC3H1	AGCAAAACCACTTTCCCTGAAATCCGACACTACTGATTCTAGTCAAGATGCTGCACTTAA
ASCRP3001983	74	43	36	48	28.5	430.5	719.5	1270.5	1071	1243	2236	1697.5	hsa_circRNA_000889	hsa_circ_0000889	circBase	chr19	-	10283765	10288043	exonic	NM_001379	DNMT1	AGCAAAATCAGGAACGCGCACTGAAAAGGAAGAAGAAAGAGATGAAAAACTGAACCTTCA
ASCRP3001984	27.5	22	19	36	29	554	118	219	229	2371	4087	1919	hsa_circRNA_101993	hsa_circ_0002278	circBase	chr17	+	18768781	18769265	exonic	NM_002767	PRPSAP2	AGCAAACTCGAATTCATCATGTATGGAGCTATCAAAGAAAATTGCAGAGAGGAATTTTGT
ASCRP3001985	26	23.5	20.5	18	20	39	43	233	71	85.5	117	87	hsa_circRNA_406320		25070500	chr3	+	108366789	108391503	exonic	NM_014648	DZIP3	AGCAAACTGAACGCAGAAACTAGCAGAGCTTTAACAGCCGAGGTATTGAAATAGAAGAGT
ASCRP3001986	19	21.5	20	19	20	107	41	79.5	37	602	1107	457	hsa_circRNA_400262		25242744	chr1	-	63944434	63955889	exonic	NM_014288	ITGB3BP	AGCAAAGAATCTACAACAAAAGACAATGATGATCATTTGATCCTTCAAAAATCACAAGGA
ASCRP3001987	17.5	23	24	20	20	96	73	165	104	449	762	524.5	hsa_circRNA_100249	hsa_circ_0004586	circBase	chr1	-	63944434	63974241	exonic	NM_014288	ITGB3BP	AGCAAAGAATCTACAACAAAAGACAATGATGATGTTAAAAGATCACTGAAGTTGGATGGT
ASCRP3001988	48	34.5	27	54	73	49	45	48	57	171.5	174	155	hsa_circRNA_403236		25242744	chr4	-	146767107	146824367	exonic	NM_178835	ZNF827	AGCAAAGAGCACAATCATACAAAAGAAAACACCATCCGGACCACGACCAGATGTTAGTAG
ASCRP3001989	169.5	327	214	105	60	970	153	155	129	759.5	635.5	621	hsa_circRNA_049948	hsa_circ_0049948	circBase	chr19	+	17311447	17313692	exonic	NM_004145	MYO9B	AGCAAAGCTCAGAAGAAGAAGCGGAAGCAGGAGCGTGCTCCCCCTCCGGACAGCAGCATC
ASCRP3001992	20	23	21	21	21	138.5	71	170	86	548	585	376.5	hsa_circRNA_100575	hsa_circ_0000225	circBase	chr10	+	27453992	27454468	exonic	NM_032844	MASTL	AGCAAATTACTAAAATCATATATTAATATGATGGATATCCTTACAACACCATCAATGGCA
ASCRP3001993	27	24	23.5	33	32	215.5	38.5	74.5	46	748	1353	980.5	hsa_circRNA_104107	hsa_circ_0076410	circBase	chr6	+	42790533	42797910	exonic	NM_015349	GLTSCR1L	AGCAACAATTCTTCTGCCAGAGACCCACAAGCATTGAACTATTTTCTACATGGACCTAGT
ASCRP3001994	22	21	18	20	22	51	29	20	24.5	188	249	204	hsa_circRNA_046141	hsa_circ_0046141	circBase	chr17	-	79476996	79479168	exonic	NM_001614	ACTG1	AGCAACACGTCATTGTGTAAGGAAAAATAAAAGTGCTGCCGTAACCAAGGCGTCATGGTG
ASCRP3001996	21	19	18	20	19	42	28	28.5	22	86.5	106	76.5	hsa_circRNA_404154		25242744	chr9	-	26861063	26887511	exonic	NM_024828	CAAP1	AGCAACCTGAAGGTTTGGAATTAAAACAAGGAAACTAAATATATTTTGCCAACTTTGGAA
ASCRP3001998	24	21	19	28	24	30	33	47	37	68	70.5	60	hsa_circRNA_005264	hsa_circ_0005264	circBase	chr8	+	132952745	132968152	exonic	NM_015137	EFR3A	AGCAACTTTTGGGAATATGAATAATGCTGTTAGACCAGTTTTTGCGAGTATGCTGCTGCT
ASCRP3001999	27	28	25	27	23	246	57	98.5	78	547	1034.5	668	hsa_circRNA_103005	hsa_circ_0059577	circBase	chr20	+	21195172	21196286	exonic	NM_018474	KIZ	AGCAAGAAAGAAAATGTGGCTGCAGATATCCCAATCACAGGCAACAGCATTATTGAGAAA
ASCRP3002001	38	44	43	103	30.5	405	140	3809	105.5	1012	1641	848	hsa_circRNA_101287	hsa_circ_0008274	circBase	chr13	-	96485180	96489456	exonic	NM_020121	UGGT2	AGCAAGATACAAGATCTCCCCAATAATATGATTTACCAAGTCGCCATTAAGTCTCTTCCT
ASCRP3002002	41	39	34	37	32	76	43	34	37	124	130	116.5	hsa_circRNA_007899	hsa_circ_0007899	circBase	chr12	+	6630963	6631203	exonic	NM_014865	NCAPD2	AGCAAGATGATGTATGAAAACACAACTACAGGCCCAGCAGCTTCCACACAAGAAAAGAAT
ASCRP3002003	28	24	19	30	26	30	31	21	25	59	48.5	51	hsa_circRNA_405195		25070500	chr14	-	31819817	31833504	exonic	NM_015473	HEATR5A	AGCAAGTGGTTCAGTTACATGTTGTTTCTTCAGTTTCTAGTTTCTTGAAGGCTTTCTTCA
ASCRP3002004	18	22	20.5	20	21.5	52	29	22	26.5	154.5	176	136	hsa_circRNA_085494	hsa_circ_0085494	circBase	chr8	-	125332326	125335616	exonic	NM_194291	TMEM65	AGCAAGTTGACATGTGGCAAACACGTCTTAGTACACATTTGGGAACCCATATTGAAATGT
ASCRP3002006	26	35	39	36	32	43.5	46.5	82.5	68	72	78	69	hsa_circRNA_103331	hsa_circ_0004030	circBase	chr3	+	41265511	41280845	exonic	NM_001098209	CTNNB1	AGCAATCAGCTGGCCTGGTTTGATACTGACCTGTAAATCATCCTTTAGGGTATTTGAAGT
ASCRP3002007	20	22	21.5	22	20	101.5	39	39	34	199	342	234.5	hsa_circRNA_007229	hsa_circ_0007229	circBase	chr10	-	89527429	89536184	exonic	NM_032810	ATAD1	AGCAATCCTGAAACTCATCTTGAAAAATGAAAATACTCCTTTCTACGAAACCGTTCAAGT
ASCRP3002009	25	36	27	21	21.5	63	34.5	25	25.5	108	84	76	hsa_circRNA_014205	hsa_circ_0014205	circBase	chr1	-	152004981	152006276	exonic	NM_005620	S100A11	AGCAATGTCACTTTTTTAAAACATGAAGCAAAAATCTCCAGCCCTACAGAGACTGAGCGG
ASCRP3002010	48.5	68	62	125.5	111	732	118.5	96	68	837.5	904	635	hsa_circRNA_402803		25242744	chr3	+	23997527	24001306	exonic	NM_005126	NR1D2	AGCAATGTCGCTTCAAAAAGTGTCTGTCTGTTGGAATGTCAAGAGATGAATTTAGTGGCA
ASCRP3002012	22	21.5	18	18	20	29	32	52	48.5	109.5	143	114	hsa_circRNA_092393	hsa_circ_0000390	circBase	chr12	+	32760890	32764217	exonic	NM_139241	FGD4	AGCACAAGAACGCTACCTTTTCTTAAAACAGAAAATCTGTGGGAGCTTAACTTTGCAGCA
ASCRP3002013	23	31	23	21	22	87	33	39	35	139	256	186	hsa_circRNA_007232	hsa_circ_0007232	circBase	chr13	-	50279756	50280508	exonic	NM_002267	KPNA3	AGCACAATAGCTGAAATAATAGAGGAATGTGGAGGAAGCAGTGTGGTTCCTTTCCAACAT
ASCRP3002014	38	30	20	24	33.5	45	49.5	132	79	96	136	114	hsa_circRNA_104487	hsa_circ_0082352	circBase	chr7	-	129821462	129832663	exonic	NM_032842	TMEM209	AGCACACAGATGAGACGAATGGGTTGTCCAGAGCTACAGATAGGAGTTGGCGAGCTTTAG
ASCRP3002015	24	22	26	27	28.5	110	36	75	43	169.5	326	223	hsa_circRNA_000533	hsa_circ_0000533	circBase	chr14	-	45696965	45700483	sense overlapping	NM_018353	MIS18BP1	AGCACAGTGAGTCACCAGGAGCTACAGAATTAAACATGGAAAAGACCAAACAAAAACAGA
ASCRP3002016	54.5	61	59.5	55	35	47	94	127	98.5	134.5	107	86	hsa_circRNA_003101	hsa_circ_0003101	circBase	chr3	+	66286967	66313803	exonic	NM_173471	SLC25A26	AGCACAGTTTTAAGAGAGGCTGGTGGGGTAGCAGGTGTTTCTGTTGACTTGATATTATTT
ASCRP3002018	22.5	25	28.5	25	20.5	199	37	29	26	236.5	302	183	hsa_circRNA_404798		25070500	chr10	-	101654702	101656154	exonic	NM_015221	DNMBP	AGCACATCCGGTCCTCAAGTACCGTAAGGGTGATGAAGATAGCCTTATGGAGAAAATTTC
ASCRP3002019	51	59	44	35	36	45.5	53	36	35	69.5	67	65	hsa_circRNA_002117	hsa_circ_0000332	circBase	chr11	-	66626276	66626387	intronic	ENST00000393955	PC	AGCACCCGCAGTTCTACTCGGGCTGTGGCCTCACCAGCAGGGTTGGCGGCGATGTCCGAG
ASCRP3002021	25	23	21.5	26	29	39	35	38.5	32	79.5	74	53	hsa_circRNA_405340		25070500	chr15	+	50724534	50731374	exonic	uc001zym.4	USP8	AGCACTAAGAGGCAACAACAATACTCAACATAAATATCTGTTCTTGAACTCCTGGGCTCA
ASCRP3002022	69	64.5	34	32	37	78	121	101.5	121	142	199.5	141	hsa_circRNA_102110	hsa_circ_0044301	circBase	chr17	+	45741524	45742524	exonic	NM_002265	KPNB1	AGCACTACAGTATCTGGTTCCAATCCTCACACAGACACTAACTAAACAGATCACAATCGA
ASCRP3002023	89	47.5	60	169.5	149	109	399	1853.5	548	388.5	677	436	hsa_circRNA_104678	hsa_circ_0085458	circBase	chr8	-	124346117	124348772	exonic	NM_014109	ATAD2	AGCACTCCTGGTTCCTGATTATGTCACTGTAATAAAGCAACCAATGGACCTTTCATCTGT
ASCRP3002024	23	25	23	37	42	87	112.5	276.5	219.5	287.5	761.5	428	hsa_circRNA_103863	hsa_circ_0001495	circBase	chr5	+	68470703	68471364	exonic	NM_031966	CCNB1	AGCACTGAAAATTCTGGATAATGGTGAATGGAATAATTGTGTGCCCAAGAAGATGCTGCA
ASCRP3002025	23.5	22	20	26	23.5	30	31	31	27	64	65	60	hsa_circRNA_400997		25242744	chr12	-	80226111	80239200	exonic	NM_002480	PPP1R12A	AGCACTTCACGTTGCAGCTGCTAAAGGCTATACGGAAGTTTTAAAGTTTTTGATTGGTCA
ASCRP3002026	20	21	16	20	19.5	42	28.5	87	53.5	79	153	103	hsa_circRNA_052947	hsa_circ_0052947	circBase	chr2	-	24033185	24080373	exonic	NM_017552	ATAD2B	AGCACTTTATTCAGTTAGTGCCAAAACACCTGAGGAATCATGTGCACAGGCATATTTGAT
ASCRP3002027	24	26	31	22	21	38	34	29	30	76	68	56	hsa_circRNA_059354	hsa_circ_0059354	circBase	chr20	-	4760668	4766974	exonic	NM_170774	RASSF2	AGCACTTTTCAAAGAGAGTGGCCCAGTATATAAAGTTCGAGATGCCGGTACTTAAAAGCT
ASCRP3002028	57	36	36	76	50	127	73.5	69	37	283.5	291	255	hsa_circRNA_100050	hsa_circ_0009759	circBase	chr1	-	11130956	11137005	exonic	NM_002685	EXOSC10	AGCAGAACAGGCCATCTCCGTCCGACAGCAGGTCGTGGATCTGTGCCAGTTCAGAAGCAG
ASCRP3002029	33	21	19	39	36	48	29	21	25	92	73	80	hsa_circRNA_092508	hsa_circ_0001175	circBase	chr20	-	61826924	61827836	sense overlapping	NM_017798	YTHDF1	AGCAGACGCTTTCTGAAAACTACTTGCTCCAAAAGACCCTCTGACTTATCAATCAGACTG
ASCRP3002030	25	24	23	22	22	43	31	57	35	71	59	64	hsa_circRNA_102625	hsa_circ_0052760	circBase	chr2	-	15564438	15567918	exonic	NM_015909	NBAS	AGCAGAGGAAATAGAGCATTATGCTCGGCAGTTTTAACGGTGACTCCCTGATGATCATTC
ASCRP3002031	24	22	20	23	21	63.5	28	30	23	272	282	203	hsa_circRNA_006906	hsa_circ_0006906	circBase	chr1	-	53459074	53459374	sense overlapping	ENST00000414168	RP11-334A14.2	AGCAGATCTGGATCATCAAAGACAGTCCTATTTTGTAACGGATTATGATCCAACCAATGA
ASCRP3002032	21	21	19	22	20	65	29.5	27	26	256	273	190	hsa_circRNA_004429	hsa_circ_0004429	circBase	chr11	-	14316016	14317401	exonic	NM_012250	RRAS2	AGCAGATCTGGATCATCAAAGACAGTCCTATTTTGTAACGGATTATGATCCAACCATTGA
ASCRP3002033	46	32	30	45	33	2068	137.5	288	348	2268	4100	2853	hsa_circRNA_030953	hsa_circ_0030953	circBase	chr13	-	113219424	113223573	exonic	NM_006322	TUBGCP3	AGCAGATGCTGCATTATTTTCAGAACTCCACAGAAAACTTCATTCACAGCTGATGTAGCC
ASCRP3002034	34	45	32.5	26.5	22	1044.5	67	52	43.5	702	635.5	529.5	hsa_circRNA_004745	hsa_circ_0004745	circBase	chr17	+	33932723	33935406	exonic	NM_001282	AP2B1	AGCAGATTCAAATCCAATGTTCTCTCTTTCCAGACGTAGTGAACTGTATGCAGACTGACA
ASCRP3002035	44	32	23	48	25	97	397.5	1944	916	459	1532	964	hsa_circRNA_402265		25242744	chr2	+	58275961	58316858	exonic	NM_006296	VRK2	AGCAGCAAATCTACTTTTGGGTTACAAAAATCCAGACCAGAAGTGATGCCACCAAAAAGA
ASCRP3002036	24	29	26	23.5	22	63	38.5	116	52	115	114	87	hsa_circRNA_102900	hsa_circ_0057953	circBase	chr2	+	208432186	208442379	exonic	NM_004379	CREB1	AGCAGCACGAAAGAGAGAGGTCCGTCTAATGAAGAACAGATTTCAACTATTGCAGAAAGT
ASCRP3002038	37	30	44	46	42	952	63	180.5	76	1047	1849	1332.5	hsa_circRNA_102638	hsa_circ_0052867	circBase	chr2	-	20507738	20527139	exonic	NM_015317	PUM2	AGCAGCAGCTCAGCAGCCACATATAGGTTTGATCTGTGGATGAAATGAATCATGATTTTC
ASCRP3002040	35	70	55	35.5	26	1315	182	696	523	2483.5	4166	2824.5	hsa_circRNA_101957	hsa_circ_0003239	circBase	chr17	-	4186092	4200109	exonic	NM_003342	UBE2G1	AGCAGCTAGTAACTTCACTTATTTCAGGTGAAGGTGGTGTTTTTAAGGCTCATCTTACTT
ASCRP3002041	27	30.5	33	55	105	65.5	47.5	238	132.5	368	473	378.5	hsa_circRNA_102129	hsa_circ_0003871	circBase	chr17	-	49294694	49302570	exonic	NM_017643	MBTD1	AGCAGCTCCGGTTACCTGTTTTAAACATACTGAACATTCTTCACGATCTGAAAGGAAAAG
ASCRP3002042	19	22	19	18	19	180	36	46.5	37	318.5	457	343.5	hsa_circRNA_000252	hsa_circ_0000252	circBase	chr10	+	96347985	96354611	exonic	NM_018063	HELLS	AGCAGCTGCTAAAAGGAAACTGGAAAAGTTGATCATCCATAAAAATTTTAACACCTTTCT
ASCRP3002043	23	20	17	21	20	41	30	20	20	77	75	86.5	hsa_circRNA_101896	hsa_circ_0040777	circBase	chr16	-	87453388	87454322	exonic	NM_015144	ZCCHC14	AGCAGCTTCAGAGTCCAACTATGTCAGCTCTATCCTGAAGAGAACTTGGAGAAACTCATT
ASCRP3002044	26	23	20	32	30	31	31	23.5	25	71	65	57	hsa_circRNA_048810	hsa_circ_0048810	circBase	chr19	-	6010146	6016282	exonic	NM_000635	RFX2	AGCAGTACATAGCTCCAGTGGCTGTTGGATAATTATGAAACAGCGGAAGGTGTGAGTCTC
ASCRP3002045	20	20.5	20	22	22	77	27	21	21	87	108	92	hsa_circRNA_007860	hsa_circ_0007860	circBase	chr4	+	106638749	106650656	exonic	NM_024751	GSTCD	AGCAGTCAGCCCAAAGGAAGGTGACCCAATGAAAGAAGAAAATGAAAGCCATAAAGAAAA
ASCRP3002046	32	23	22.5	31	29.5	151	34.5	67.5	48	211	231	184	hsa_circRNA_001267	hsa_circ_0001267	circBase	chr3	+	10094070	10103895	exonic	NM_033084	FANCD2	AGCAGTGCACACAGGGCATTTTAGATTATCTGGATAACATATCCCCTCAGCAAATACGAA
ASCRP3002047	22	24	22	26	22	48.5	30	21	24	73.5	63	56	hsa_circRNA_402962		25242744	chr3	+	135719900	135722335	exonic	NM_002718	PPP2R3A	AGCAGTTTTGATTCAGCAGACTCCAGAGGTGATCAAGGTTTCTCTGTCATTCACAGAAAA
ASCRP3002048	54	32	28.5	85	90	48	48	25	39	69.5	73	68	hsa_circRNA_013187	hsa_circ_0013187	circBase	chr1	+	93306107	93306565	exonic	uc001dpd.3	RPL5	AGCATAAAGTGATGTGATGGCCCACAAATACAATGTATAGTAATTAAATCATGGAGGAGA
ASCRP3002049	28.5	25.5	26	43	41.5	308.5	49	127.5	123	911	1382.5	953	hsa_circRNA_018380	hsa_circ_0018380	circBase	chr10	+	51749067	51767836	exonic	NM_001077665	AGAP6	AGCATACCTGATGAACAGTTACACTCATTTGCGCTTTGGAGTTTAACCTTTCTGCCAATC
ASCRP3002050	33	23	22	32	27	35	33	25	32	58	55.5	56	hsa_circRNA_400105		25242744	chr1	+	2087433	2106752	exonic	NM_002744	PRKCZ	AGCATAGACTGGGACTTGGATATTGACTGGGTACAGACAGAGAAGCACGTGTTTGAGCAG
ASCRP3002051	31	28	25	30	20	77	32.5	35	29	142	143.5	118	hsa_circRNA_100874	hsa_circ_0003376	circBase	chr11	+	70251370	70253697	exonic	NM_005231	CTTN	AGCATATCAAACGGAATCAGTCCCCAATGCCTGGAAATTCCTCATTGGATTACTGTGTTT
ASCRP3002052	21	26	23	26	22	72	93.5	367	159	221.5	446	291.5	hsa_circRNA_002228	hsa_circ_0002228	circBase	chr7	-	16415716	16445962	exonic	NM_001101426	ISPD	AGCATATCAGCAGAGTATGTTGGATAAAGGACATTGTTGTGGCAGTAACTGGAGAGAACA
ASCRP3002053	23	28	30	28	29	48.5	46	259	111	108	83.5	76	hsa_circRNA_103654	hsa_circ_0001417	circBase	chr4	-	73950965	73958017	exonic	NM_032217	ANKRD17	AGCATCAAATGGGGTGGCACTGAATCAACAAGACAAGCAACTCAATTGATTAATGCTTTG
ASCRP3002054	26	26	23	55.5	49	233	99	211	178.5	1187	1860	1188	hsa_circRNA_004804	hsa_circ_0004804	circBase	chr9	+	128691933	128697886	exonic	NM_006195	PBX3	AGCATCACAGTGTCACAGGCATGTAATGAATTTACTACACATGTGATGAACCTTCTCCGA
ASCRP3002055	42	50.5	43	35	30	59	44	33	41	101.5	105	85	hsa_circRNA_103611	hsa_circ_0069323	circBase	chr4	-	22403053	22440043	exonic	NM_145290	GPR125	AGCATCTGCCAAGCATGCCCTAACCATTTCTAATATTCAGGCTGGATCTACTGGAAATTG
ASCRP3002056	21	20	19	19.5	19.5	44	35	90	68	137	199	146	hsa_circRNA_404560		25070500	chr1	+	109427896	109428200	exonic	NM_013296	GPSM2	AGCATGAGAGAAGACCATTCTTTTCATGTTCGTTACAGAAATGTTGCTGAAGTGCTGCTG
ASCRP3002057	64	56	56	100.5	42.5	2456	1091	7228	3500	5890	10674	6263	hsa_circRNA_103571	hsa_circ_0008106	circBase	chr3	+	197592293	197598333	exonic	uc003fyk.2	LRCH3	AGCATTCATGTTCCCTCACCAGCTGTAAGTGATGACAGACCTAATGCTCTATTAAGTTCA
ASCRP3002058	20	17.5	19	23	20	54	39	54.5	55	159.5	211.5	161	hsa_circRNA_404471		25070500	chr1	-	33097427	33100393	exonic	NM_178547	ZBTB8OS	AGCATTGATCAAAGAAATTTCAAATTACGATCAATTGGATTTGGATCATACAGCAGATGT
ASCRP3002059	25.5	26	23	21	20	47	28	22	22	68.5	67	60	hsa_circRNA_406023		25070500	chr2	-	202400743	202446940	exonic	NM_152525	ALS2CR11	AGCATTTTAAAAGCAGACTCATCTCTATCAGAGGTTCCCAGACGTTATGATGATAAGCGG
ASCRP3002060	27.5	23.5	19	23	23	48	41	29	48	111.5	131	118.5	hsa_circRNA_102620	hsa_circ_0002229	circBase	chr2	+	11905658	11907984	exonic	NM_145693	LPIN1	AGCATTTTTTGTTCAAGAAACAGATAATGATCAGGTGCAGACCATGAATTACGTGGGGCA
ASCRP3002061	22	24	22	20	21	42	33	58	30	80.5	100	76	hsa_circRNA_406474		25070500	chr4	+	48371865	48396670	sense overlapping	NM_020846	SLAIN2	AGCCAAACAGTTGCTTCAAACTTCATCTACAAAAAGAGGCTGTATTCATCACCAAAGAAA
ASCRP3002063	34	32	38	51	40	123	166	685	278.5	357	641	423.5	hsa_circRNA_101147	hsa_circ_0028255	circBase	chr12	-	111923074	111948386	exonic	NM_002973	ATXN2	AGCCAAGACATATAGAGCAGTTCCAAGATTATCCCCTAAAACTCATAGACCCAGGTCTCC
ASCRP3002064	22	24	26	28	25	41	34	23	43	82	92	62	hsa_circRNA_002576	hsa_circ_0002576	circBase	chr8	-	90736856	90737869	exonic	NR_125822	LOC101929709	AGCCAAGCAATACAGGTGGCTTCTTTCAAGAAGTTGGAAAAGTTCATTGGAAATTTCTGC
ASCRP3002066	33.5	24.5	25	34	45	40.5	28.5	21.5	23	66	73	64	hsa_circRNA_104669	hsa_circ_0085173	circBase	chr8	+	102570646	102571040	exonic	NM_024915	GRHL2	AGCCACAGAGAAACTGCCTTGGCACCAGTGAAGCCCAGAGTAATTTGAGTGGAGGAGAAA
ASCRP3002067	21	22	19	26.5	26	55	39	99	78	130	275	161.5	hsa_circRNA_057727	hsa_circ_0057727	circBase	chr2	-	201741641	201752408	exonic	NM_032472	PPIL3	AGCCACATTTGGACATGAAATACACCGTATTTGGAAAAGACTTATTTTTGAGCTCGCTGT
ASCRP3002068	30	37	35	29	29	55	33	82	49	116.5	105	88.5	hsa_circRNA_054626	hsa_circ_0054626	circBase	chr2	-	55785910	55795499	exonic	NM_020463	SMEK2	AGCCACCAAGGTGCCCTTCGCTTTATGAGGCGGATAATTGGACTTAAAGATGAATTTTAT
ASCRP3002069	105	83	108	148	144	870.5	146.5	126.5	217.5	1003	2256	1477	hsa_circRNA_100637	hsa_circ_0006956	circBase	chr10	+	86177526	86185649	exonic	NM_018999	CCSER2	AGCCACCCTGACCACTATCATCACCATGGAAAAAGTGACTTGAGCAGGATATTTTGAATA
ASCRP3002070	22.5	21.5	24	28	25	59	32	20.5	33	158.5	198.5	162	hsa_circRNA_103274	hsa_circ_0001261	circBase	chr3	+	4558159	4562778	exonic	NM_002222	ITPR1	AGCCAGAAACCGGGGACCTTAACAATCCACCTAAGAAATTCAGAGGATTTTCAAGAAAGA
ASCRP3002071	26	28	42	29	28	54	39	41	41	205	290.5	217	hsa_circRNA_092562	hsa_circ_0001617	circBase	chr6	-	86267693	86284096	exonic	NM_020468	SNX14	AGCCAGACAGAAAGGTATATTCATATTTTAATGATCTTCTGGTCATTTGTTGCTGGAGTT
ASCRP3002072	49	33	30	55	31	75.5	41.5	30	38.5	179	111.5	103	hsa_circRNA_406752		25070500	chr6	+	31592304	31592917	intronic	ENST00000376007	PRRC2A	AGCCAGAGTCTTCCACTTTTATAGCATGTCCTCAGGAAATGTCTTCTTGCAGCACTTAAT
ASCRP3002074	29	27	38.5	33	25	828	55	80	86	1299	2829	2099	hsa_circRNA_006023	hsa_circ_0006023	circBase	chr2	+	27900161	27900791	exonic	NM_018158	SLC4A1AP	AGCCAGCAGAGATTCCAGAACTAAAAAAGTTGCAAAATTAAATGATGCTGAAAGGGAACT
ASCRP3002075	32	30.5	35.5	42	43	93	34	31.5	28	142	156	144.5	hsa_circRNA_405243		25070500	chr14	+	62462593	62463260	exonic	uc010tsd.1	SYT16	AGCCAGCTCCCTGGTACTTTAGAAACTGTTAATGGAAAAAAGCAAGCTGGAAGTTTTGAG
ASCRP3002076	24.5	29	28	32	29	56	42	108	94	134	117	98.5	hsa_circRNA_004417	hsa_circ_0004417	circBase	chr1	+	219366423	219414650	sense overlapping	NM_138794	LYPLAL1	AGCCATCCAACCTACATAAGACTATGACATCATATACTCCTATGAAAGGAGGAATCTCCA
ASCRP3002077	23	21	22	22	22	35	27	25	23	74	55	50.5	hsa_circRNA_005525	hsa_circ_0005525	circBase	chr18	-	55398858	55399064	sense overlapping	NM_005603	ATP8B1	AGCCATTCAGAAAAGCAGGTAGTTCCAATTTGCCAGCAGAATGAGTACAGAAAGAGACTC
ASCRP3002078	23	23.5	24	25	25	65.5	32	29	32	148.5	159	138	hsa_circRNA_005839	hsa_circ_0005839	circBase	chr5	+	68400457	68410323	exonic	NM_022902	SLC30A5	AGCCATTGCCTTCTTAGGTGTGGCAGATCACAAGTGGATCAAAATATTTAAACATGCAGT
ASCRP3002080	43	87	83	49	30	341	554	2230.5	736	1513	2174.5	1509	hsa_circRNA_100125	hsa_circ_0011168	circBase	chr1	+	29313942	29323831	exonic	NM_203342	EPB41	AGCCATTTGGGATAACGCAACCTCTAAGCAACATCATGACAACAGAGAAGAGTTTAGTGA
ASCRP3002081	59	50	41	91	74	146.5	134	392	169	325	561.5	426	hsa_circRNA_402563		25242744	chr20	-	32681480	32686439	exonic	NM_003908	EIF2S2	AGCCCAAACATCTCCTTGCATTTTTGTTGGCTGAATTGGGTACAAGGATCTTAAGATTGA
ASCRP3002082	74	26	24	60	22	1102	212	771.5	617	2152	4178	2816.5	hsa_circRNA_405361		25070500	chr15	-	59204757	59209198	sense overlapping	NM_024755	SLTM	AGCCCAAGTAAGTAAAAAACATGAAGCAGATGAGTTGAGTGGAGATGCTTCTGTGGAAGA
ASCRP3002083	49	44	31	40	34.5	85	65	50	44	127.5	100	90	hsa_circRNA_043368	hsa_circ_0043368	circBase	chr17	+	36912135	36920478	exonic	uc002hqr.3	PSMB3	AGCCCACTTTTTTTTCTTTTTTTGAAATAAAATAGCCTGTCTTTCATGCCCAGCGCCTCA
ASCRP3002084	23	25	24	37	37	39.5	47	52	28	76	72	65	hsa_circRNA_056670	hsa_circ_0056670	circBase	chr2	+	148653869	148672903	exonic	NM_001616	ACVR2A	AGCCCAGTTGCTTAACGAATATGTGGCTGTCAAAATATTTCCAATACAGGTGCTATACTT
ASCRP3002085	3289	7184	11100	5494	1982	2185.5	8000	16297	5808	2258	2460	1934	hsa_circRNA_060102	hsa_circ_0060102	circBase	chr20	+	34143977	34145405	exonic	NM_015966	ERGIC3	AGCCCCAGCCCCAGGTTGATAAATCTATTGATTGATTGTGATAGTACCTCCATGATGTTC
ASCRP3002086	41.5	33	37	56	55	154.5	55	158.5	89.5	375.5	710	498	hsa_circRNA_100564	hsa_circ_0017953	circBase	chr10	+	22002700	22002879	exonic	NM_004641	MLLT10	AGCCCCTGCTGTTGCTACAACTCAGGTATTTATAACAGCAATGATGTAGCAGTATCGTTT
ASCRP3002089	24	24	21	24	25	39.5	30	22	25	63	52.5	57	hsa_circRNA_006230	hsa_circ_0006230	circBase	chr7	+	157013382	157047004	exonic	NM_014671	UBE3C	AGCCTAGAGGACCTAAAATCCTTTACAAACTATTCAGGTCACTCAGCTCTATGTGCCAGC
ASCRP3002090	75	83	74.5	93.5	65	579	118	181	102	663	841.5	712	hsa_circRNA_403788		25242744	chr7	-	26883648	26894509	exonic	NM_003930	SKAP2	AGCCTCAGAACGATATGATAAAGACGATGAAGCCCCCTCTGATGATGTTGAAACATTTGT
ASCRP3002091	119	324	298.5	65	53	212	383	527	758	195.5	259	228	hsa_circRNA_104855	hsa_circ_0087888	circBase	chr9	-	111795586	111800397	exonic	NM_032012	TMEM245	AGCCTCAGCGAGGGGTGTTTGATGCTTCCCTCAAAATGGCTGGCTTCTATGGATTGTATA
ASCRP3002092	27	26	26	27	22.5	322	64	181.5	151	706	1729	1117	hsa_circRNA_100359	hsa_circ_0008998	circBase	chr1	-	155891165	155891709	exonic	NM_014949	KIAA0907	AGCCTCCAGCTAGCACTGGACAGGTTCATGCTGAATACTCTAGATTTGTGAATCAGATTA
ASCRP3002093	78286	91566	86392	71540	5998	64708.5	117540	178181	102137	65725	96874	72808	hsa_circRNA_001831	hsa_circ_0001831	circBase	chr8	+	144894444	144895014	antisense	NM_015356	SCRIB	AGCCTCCGCAGCAGGTTCTCCGTGAGGATCAGCTCAGAGAGGTTCTCACAGTCCCCGATG
ASCRP3002094	572	741	680	2177	1525	8564	1145	3434	529	7356.5	10668	8225	hsa_circRNA_104756	hsa_circ_0086694	circBase	chr9	-	33932559	33933626	exonic	NM_018449	UBAP2	AGCCTCTCTGCACATGCAGCCCTCTCCTCGAGCACGTCACACACACTCCAAAGACAACAG
ASCRP3002095	109	89	110	390.5	598	374	186	228.5	150	652	632	534.5	hsa_circRNA_406338		25070500	chr3	+	122928045	122978436	exonic	NM_012430	SEC22A	AGCCTGCCTTTACCAGGTCTTCTCTGTTGGTTGAAATGTCTATGATTTTATCTGCCTCAG
ASCRP3002096	22	24	22	28	26	49	28	21	21	75	68	62.5	hsa_circRNA_050715	hsa_circ_0050715	circBase	chr19	+	36584932	36590519	exonic	NM_173636	WDR62	AGCCTGCTGAGTGAGGCAGGATACGTATGTGTCCACACCTAGTGAGATTCACTCCCTGAG
ASCRP3002098	38	22	19	42	36.5	78.5	40	66	55	110	147.5	122.5	hsa_circRNA_100531	hsa_circ_0017461	circBase	chr10	+	1139391	1142186	exonic	NM_014023	WDR37	AGCCTGTTGCTGACACTAGTTAAATTCTATCAAATTTCATCCCTCAGAGCAGTTGGCTCT
ASCRP3002100	22	20	19	24	22	93	32	35	40	126	98	72.5	hsa_circRNA_005054	hsa_circ_0005054	circBase	chr15	-	33149215	33194241	exonic	NM_001103184	FMN1	AGCCTTTCAAGGACAAACTAGAGGAGTTCTTCCAAAAAGATTTTTACATGAGTTAGCCCA
ASCRP3002102	21	25	20	23	23	37	26	22	26	142.5	162	148	hsa_circRNA_103614	hsa_circ_0001398	circBase	chr4	+	25334804	25335610	exonic	NM_024936	ZCCHC4	AGCCTTTTATTGGATATTGATTTTCGGTACTTGAAGTTTATTGAGTTGCCCTTGACTCAG
ASCRP3002103	22	24	22	20	20	49	56	153	86.5	145.5	162	138	hsa_circRNA_100358	hsa_circ_0000139	circBase	chr1	-	155823066	155823597	exonic	NM_032292	GON4L	AGCCTTTTTCAGGAGAGCCTAGTGAAGAAGTCAAGGAAGAAGGAGAATGGAACAAAAGTG
ASCRP3002104	30	28	25	38	35	157	34	28	28	144	202	143	hsa_circRNA_056473	hsa_circ_0056473	circBase	chr2	+	131796425	131801156	exonic	NM_015320	ARHGEF4	AGCGAATGTTCTTTCTCTTTGACCACCAGCTCATCTACTGTAAGAAGCTCATCAGCGATG
ASCRP3002105	172.5	572.5	378	92.5	53.5	1822	259	261.5	148	1366	1080	1060	hsa_circRNA_405805		25070500	chr19	+	50117789	50119476	exonic	NM_020719	PRR12	AGCGAGGACGCTGGCGTTGCAGACGGGGCGTGAACCCCCACCCATCTGGCGAGTCCAGAA
ASCRP3002106	24	23.5	19	28	29	32	36.5	67.5	33	67	75	68	hsa_circRNA_024251	hsa_circ_0024251	circBase	chr11	+	108586605	108594189	exonic	NM_004398	DDX10	AGCGGCATAATGTGTTTGGATTGGACCTTAAAGACGAGAAAACATTACAGAATCAATCCA
ASCRP3002107	31	31	31	37	42	166	40	60	60	264.5	318	208.5	hsa_circRNA_400220		25242744	chr1	-	44713610	44785416	exonic	NM_024066	ERI3	AGCGGCATTGGAAATCATCGAGTTCCCCATCCTAAAGCTAAATGGCCGGACCATGGAGAT
ASCRP3002108	138	200.5	227	504.5	404.5	181	505.5	644	570	676	807	503	hsa_circRNA_104434	hsa_circ_0081343	circBase	chr7	+	98985661	98985884	exonic	NM_005720	ARPC1B	AGCGGCTCTCGTGTGATCTCCATCTGTTATTTCGAGCAGGAGAATGACTGGCATCGACTG
ASCRP3002109	20	21	19	23	24	37.5	36	65	68	138.5	189	147	hsa_circRNA_401949		25242744	chr18	-	29218606	29246335	exonic	NM_004775	B4GALT6	AGCGGCTGGAATTTGCGTTTTATGTCATTGAACAGCCAACACATATCTCTTTATGGTACA
ASCRP3002110	38	37.5	32	40	30	75	565	3118.5	976.5	333	856	593	hsa_circRNA_018315	hsa_circ_0018315	circBase	chr10	+	49609654	49613024	exonic	NM_002750	MAPK8	AGCGGGCCTACAGAGAGCTAGTTCTTATGAAATGTGTTAATCACAAAAATCTTCTTGGTG
ASCRP3002111	23	24	20	24	25	57.5	35	43	61	358	394	338	hsa_circRNA_067735	hsa_circ_0067735	circBase	chr3	+	150834124	150845771	exonic	NM_053002	MED12L	AGCTAAAATTAAGAAACGTCAGGCTCCTGATCCGAATTTGGGATGAACTTACTGCTGTGA
ASCRP3002112	26	26	21	21	20	55	53	89.5	46	88	108	89	hsa_circRNA_005152	hsa_circ_0005152	circBase	chr16	-	9009110	9011013	exonic	NM_003470	USP7	AGCTAAGTATCAAAGGAAAGAAAAATAGCTGTGTACATGATGCCAACCGAGGGGGATGAT
ASCRP3002113	27	23	23.5	28	24	69	90	710	179.5	135	190.5	118.5	hsa_circRNA_000251	hsa_circ_0000251	circBase	chr10	-	94291504	94297307	exonic	NM_004969	IDE	AGCTACAGGGAATCCTAAACACCCCTTCAGTAAATTTGGGACAGTTTCCAAAAAAAGACT
ASCRP3002114	31	28	25	43	38	62	39	52	35.5	170.5	239	174.5	hsa_circRNA_025554	hsa_circ_0025554	circBase	chr12	+	19615443	19667718	exonic	NM_153207	AEBP2	AGCTACCCAAAGATACTGCCTTGCTTTTGGACCCAAACATATACAGCATAAGCAGTACTA
ASCRP3002115	19	20.5	17	19	19	41	27	22.5	26	78	82	73.5	hsa_circRNA_404383		25242744	chrX	-	74670636	74698820	exonic	NM_144969	ZDHHC15	AGCTACCGGTTTACACAAGAACTGGAAGTGGAGTTATTTACCTCATACTCTACCATGCCA
ASCRP3002116	33	26	25	36	35	40	52	37	35	87	86	67	hsa_circRNA_405906		25070500	chr2	-	69754347	69759294	exonic	NM_014911	AAK1	AGCTACTCAAGAAAGAGTGCCCAATTCCAAATGTACAGGTTGAAAACATCCTCTTGCATG
ASCRP3002117	22	20	20	25.5	21	52	34	40.5	33	108	148.5	104.5	hsa_circRNA_012964	hsa_circ_0012964	circBase	chr1	+	76211490	76216231	exonic	NM_000016	ACADM	AGCTACTTGTAGAGGTATTTTTTATTGGCACGTTCTGATCCAGATCCTAAAGCTCCTGCT
ASCRP3002118	22	22	21	23	21	461	40	47.5	33.5	1326.5	2244	1381	hsa_circRNA_406707		25070500	chr5	+	162890861	162891808	exonic	NM_012484	HMMR	AGCTAGAAAAGTTAAGTCTTCGGAATCAAAGGTTGTGCACCATCTCCAGGTGCTTATGAT
ASCRP3002119	65	54	37	42	40	210	53.5	40	48	266	289.5	251	hsa_circRNA_101579	hsa_circ_0036113	circBase	chr15	+	71229099	71256271	exonic	NM_017691	LRRC49	AGCTAGATATGAAGAGAATCACGAGAGATGTGGATAATTTGCCCTGCCTCCAACATCTCT
ASCRP3002120	19	20	19.5	21	21	38	28	22	20	68	64	68	hsa_circRNA_406647		25070500	chr5	-	109973898	109978072	exonic	NM_001039763	TMEM232	AGCTAGCAAAGGCCAACATTTTCAATCACAAAAGAATTCATCTTGAGATTCAATCAAACA
ASCRP3002121	30	24	22.5	30	26	137	103	248	103	408	643	369	hsa_circRNA_004117	hsa_circ_0004117	circBase	chr10	-	103699619	103717489	exonic	NM_024541	C10orf76	AGCTAGCAAGGTGACCCATGCATTGGTTAATATCAGCCTTGATAAATTTGCTGAAGTTCC
ASCRP3002122	42	25	26	48	27	740.5	149	416	278	1917	4170	2674	hsa_circRNA_101463	hsa_circ_0000586	circBase	chr15	-	25650607	25657118	exonic	NM_000462	UBE3A	AGCTAGCCGAATGTTAAAAATCTGTAAGAGCCTGATTTTAGAATTCACCAGCTCCTCAGA
ASCRP3002124	28	23	20	32	31	36	29.5	26	27	61	50	62	hsa_circRNA_101612	hsa_circ_0000641	circBase	chr15	-	77344726	77348597	exonic	NM_005724	TSPAN3	AGCTATTCAGGGGGCAGCTGGCATTTTATGCTATGTGGGAGCCTATGTCTTCATCACTTA
ASCRP3002125	20	21	22	21	19	35	34	77	33.5	66	61	58.5	hsa_circRNA_103811	hsa_circ_0001472	circBase	chr5	+	36953719	36976504	exonic	NM_015384	NIPBL	AGCTATTGAAAGGGAGCGCTTCTCAAAAGAAGTTCAAGATAAAGTGTTTGGGAAATGGGA
ASCRP3002126	20	20	18	18	21	32	31	32.5	41	70	69	60	hsa_circRNA_005338	hsa_circ_0005338	circBase	chr2	+	61389976	61391675	sense overlapping	NM_001143959	C2orf74	AGCTCAAAAAAGGTTTCCAAGGCAGGAAAGGTAAAGAGACAAAGAAAGTGCCTTGTACAG
ASCRP3002127	21	22	20	20	20	45.5	40.5	61.5	35	124	139	114.5	hsa_circRNA_101801	hsa_circ_0002500	circBase	chr16	-	46708225	46711310	exonic	NM_018206	VPS35	AGCTCAACCTTGAACAATTGTTTTGACTGGCATATTGGAGCAAGTTGTAAACTGTAGGGA
ASCRP3002128	46	36	23	23	23	42	74	23	51	88	68	68	hsa_circRNA_067574	hsa_circ_0067574	circBase	chr3	+	140978964	141006295	exonic	NM_152282	PXYLP1	AGCTCACACAGACAGGACATGTTCCCGATTTGAGGTGAAACCATGAAGAGAAAATAGAAT
ASCRP3002129	63	59	55	81	79.5	274.5	72	73.5	68	388.5	473.5	370	hsa_circRNA_050374	hsa_circ_0050374	circBase	chr19	-	33106563	33117733	exonic	NM_032139	ANKRD27	AGCTCAGAAGGGCAGGCATCCCTCATCGACCTCCTGGTTTCCAAGGGCGCCATGGTAAAT
ASCRP3002130	52	32	34	65	72	79	41.5	28	47	142	130	133.5	hsa_circRNA_046689	hsa_circ_0046689	circBase	chr18	-	697239	706578	exonic	NM_017512	ENOSF1	AGCTCAGATGGCACACGGACCCTGACTACTCGGCTGCCTATGTCGTCATAGAAACTGATG
ASCRP3002131	24.5	27	21	24.5	24.5	191.5	48	183	275	1174	1260	1051	hsa_circRNA_100280	hsa_circ_0013204	circBase	chr1	-	93790191	93791452	exonic	NR_034089	LOC100131564	AGCTCATATTCAAGCTGGGGAGACAAACAACATACAAATAACTGATACCGTGCTTCCAGA
ASCRP3002132	22	19	18	26	23	36	32	27	32	89	121	97	hsa_circRNA_103775	hsa_circ_0005066	circBase	chr4	+	186180001	186188309	exonic	NM_031953	SNX25	AGCTCATTAACAGCAACTCTGATGTGGAGTTCTTGAAGCAACTAAGTGTTCGACTACAGT
ASCRP3002133	38.5	42	44	54.5	45	345.5	58.5	180.5	76	290	399	342	hsa_circRNA_002824	hsa_circ_0002824	circBase	chr9	+	5021962	5044520	exonic	NM_004972	JAK2	AGCTCCTCTTCTTGATGACTTTGTCATGTCTTACCTCTTTGCTCAGGCAAATGTTCTGAA
ASCRP3002134	22	23	24.5	35	42	80	50	95.5	72	238	358	281.5	hsa_circRNA_402483		25242744	chr2	-	225422375	225422573	exonic	NM_003590	CUL3	AGCTCTACACTGGACTAAGAGAAGTTGTTACCGAACATCTCATAAATAAGATGACCATGG
ASCRP3002135	30	40	43	46	40.5	40	40.5	43.5	29	79	96	92	hsa_circRNA_032731	hsa_circ_0032731	circBase	chr14	+	76349027	76368567	exonic	NM_015072	TTLL5	AGCTCTACAGGCAATCTTTGGCAGCCAGACACTACCTAACTCCAATTTATGGACAATGAA
ASCRP3002136	20	21	19	20	19	38	26	23	23	122	134	106	hsa_circRNA_404559		25070500	chr1	+	109325043	109337529	exonic	NM_007269	STXBP3	AGCTCTGCAAAACTGAACAGATATAAAACAGATGGAAAAGAAAAGGAGGCCATCCTTGAA
ASCRP3002137	32	27	25	31	34	45	58	35.5	45	93.5	117.5	88	hsa_circRNA_401533		25242744	chr16	+	9196840	9197116	exonic	NM_014117	C16orf72	AGCTCTGCATGAAAGCGTGGATACCCATCAACGAAGTTTTGATATTGGAATTCAGATTGG
ASCRP3002138	33	29	27	38	38	73	30	22.5	25.5	130	100	76	hsa_circRNA_029987	hsa_circ_0029987	circBase	chr13	+	35644044	36220485	exonic	NM_015678	NBEA	AGCTCTGCCATGCACCTGAGTACCTTCAAGTTTAAATCTGAGAGTGATATTCATTTGGCA
ASCRP3002139	31	30	22	33	32	60	48	78	67	97	128	108	hsa_circRNA_101995	hsa_circ_0042415	circBase	chr17	-	19835117	19866335	exonic	NM_007202	AKAP10	AGCTCTGCGTCTCAGCTTCAATATCCGTACATTCCCCACAAAAAAGCACTAAAAATCATG
ASCRP3002140	18	22	21	21	20	70	31	25	24	214.5	185	148	hsa_circRNA_103070	hsa_circ_0060551	circBase	chr20	+	44444179	44444552	exonic	NM_007019	UBE2C	AGCTCTGGAAAAACCCCACAGGTATATGAAGACCTGAGGTATAAGCTCTCGCTAGAGTTC
ASCRP3002141	20	23	23	19.5	21	32	64	307	167.5	71	69	61	hsa_circRNA_400661		25242744	chr10	-	120445494	120489922	exonic	uc010qst.1	CACUL1	AGCTCTGTCACAAAGCTGTTCATGGAAGAGGATGTTGGACTTCTTACTTGTAATGAATGT
ASCRP3002142	71	49	41	81	63	224	366	2465	1113	506.5	1367	817	hsa_circRNA_100039	hsa_circ_0009590	circBase	chr1	-	8616533	8674745	exonic	NM_012102	RERE	AGCTCTTCATTTCTGATTACGTTGACACTTACCATGCTGCTGCCCTTAGGTCCACAACTC
ASCRP3002143	31	28	28	35.5	34	63	36	48	33	93	109	68	hsa_circRNA_100047	hsa_circ_0005199	circBase	chr1	+	10155518	10165802	exonic	NM_006048	UBE4B	AGCTCTTTGTCTAGGAGTAGCCCATCGAAGCCAGAGCAGTGAAGGAGTCAGTTCTCTCAG
ASCRP3002144	23	24	19	25	22	54	31	28	36	137	169.5	129	hsa_circRNA_103533	hsa_circ_0068245	circBase	chr3	-	183551279	183551613	exonic	NM_018622	PARL	AGCTCTTTTTGGAATTCTGGTGCCATCATGACAGTCCTCGCAGCTGTCTGCACTAAGATC
ASCRP3002145	22	23	18	23	27	34	31	43.5	26	85	93	80	hsa_circRNA_059400	hsa_circ_0059400	circBase	chr20	+	5939173	5948671	exonic	NM_032485	MCM8	AGCTGAAGAAAACCTGTTTAAACTCATTGTCAAGGTGTACAACTATGAGCCTTTGACACA
ASCRP3002146	22	24	21	25	21.5	41	57	31	24	79	75	77.5	hsa_circRNA_400296		25242744	chr1	-	109952549	109964548	exonic	NM_002790	PSMA5	AGCTGAATGCAACAAACATTGAGGGGCGTGAATACTTTTTCTCCCGAAGGAAGATTATTT
ASCRP3002147	73	75	56	56.5	54	513	104	116	77.5	509.5	706	562.5	hsa_circRNA_402505		25242744	chr2	-	239082174	239103511	exonic	NM_030768	ILKAP	AGCTGACCCCCAATGACAGGGAAAGAAGCTCAGAAAGGACCCCTGCTCTTTGATGACCTC
ASCRP3002148	30	27	27	23	21	57.5	71	82	106	109	155	126	hsa_circRNA_001555	hsa_circ_0001555	circBase	chr5	-	171482591	171484477	exonic	NM_005990	STK10	AGCTGAGCAGCGTGAGAAGATCAAGCAGACCGGGAAGCAGCCCTGTGGGAGATGGAAGAG
ASCRP3002149	26	28	23	24	23	84.5	34	22	20	126	131	118	hsa_circRNA_006440	hsa_circ_0006440	circBase	chr17	-	13442383	13445247	intronic	ENST00000284110	HS3ST3A1	AGCTGAGGACCCAGATATGTATCAATGAAGTCAAGGCATCCATTCCTTCAACATGCTTTA
ASCRP3002150	27	21.5	20	24	23	93	107	465.5	217.5	252	437	326.5	hsa_circRNA_004119	hsa_circ_0004119	circBase	chr6	-	57058639	57075243	exonic	NM_016277	RAB23	AGCTGAGGATCCAGAACTAACGCATTCAAGTAGTAACAAGATTGATTTGAGAGGGAAGAT
ASCRP3002151	27	28.5	24	28	24	198	55	173.5	114	299	704	422.5	hsa_circRNA_016114	hsa_circ_0016114	circBase	chr1	+	203807093	203809502	exonic	NM_014827	ZC3H11A	AGCTGATCCAGATAATGAGGATGCAACAGGCGGTGACAGTGATCCTCCATTAAAGCGTAG
ASCRP3002152	23	22	23	25	27	58.5	48	299.5	64	86	102	67	hsa_circRNA_406135		25070500	chr21	+	30693541	30724134	exonic	NR_027655	BACH1	AGCTGCTAAGATAAGGTTGATGATAATTAGAAGCATGCTTTCCACTGAACTTCCCGACAA
ASCRP3002153	25	20	21	30	29	37	28	31	22	66	81	61	hsa_circRNA_102969	hsa_circ_0059067	circBase	chr2	+	242312498	242312705	exonic	NM_014808	FARP2	AGCTGCTGGACAACACCATGGAAATATTTGACATTGAGTGTTTTCTTCACTCATGGTGAA
ASCRP3002154	27	22	20	23	22	81.5	89	216	151	594	1081	770	hsa_circRNA_406721		25070500	chr5	+	179007947	179020646	exonic	NM_025158	RUFY1	AGCTGGAAGAAGTCAAAGCGATTAATTTACAGATGTTTCACAAAGCTCAGGCATGAAAGA
ASCRP3002155	21	26	22	21	25	46	28	21	23	84.5	161	116	hsa_circRNA_004655	hsa_circ_0004655	circBase	chr12	+	102295068	102308010	exonic	NM_018370	DRAM1	AGCTGGAGTGGAATCCAAGAGAAAAGGTGCAGCCACGATGTATACAAGATACAAAATAGT
ASCRP3002156	30.5	28	29.5	27	24	87.5	265	1598	399.5	249	443	301	hsa_circRNA_403705		25242744	chr6	+	131466424	131490413	exonic	NM_016377	AKAP7	AGCTGGCAGAAGGAGATCATGTAAACTCACTTTTGGAGATAGCAGGAGGAATTAATTCCA
ASCRP3002157	23	19	18	22.5	23	51	28	23	24	84	111	91	hsa_circRNA_406303		25070500	chr3	-	72881519	72893604	exonic	uc010hod.3	SHQ1	AGCTGGCCAAGTTTGATCCTGATCATTATCTGACTTCATGAGACCTGTGTTAAATCTGCA
ASCRP3002158	1524.5	3546	3779	2217	1917	784	4779	8317	8318	2171.5	1537.5	845	hsa_circRNA_033572	hsa_circ_0033572	circBase	chr14	-	105403590	105444694	exonic	NM_138420	AHNAK2	AGCTGGCTTGGCTGTTCCCTGGATGGGCAATAAAGAAAGTGCTGCATCCCCCGCGGCAGC
ASCRP3002159	28	23	20	34	37	57	32	27	29	75	103.5	74	hsa_circRNA_405054		25070500	chr12	-	104200099	104208899	exonic	NM_001031701	NT5DC3	AGCTGGGAACTGTCTACAGAATTGGTTCCTTCCATTATGAGCAACTTGTTGAATCCAGAT
ASCRP3002161	44.5	44.5	38	59	68	234	51.5	32	36	223.5	191	181	hsa_circRNA_060332	hsa_circ_0060332	circBase	chr20	-	37049238	37063962	exonic	uc002xig.3	SNHG17	AGCTGTCGTTCACTTTTTACCCACCCATTCAATAAACCTTACAGAATTGCCCGTCCCTCG
ASCRP3002162	26	20	21	33	31.5	54.5	32	72.5	41	104	120	113	hsa_circRNA_102622	hsa_circ_0052712	circBase	chr2	-	15415607	15417225	exonic	NM_015909	NBAS	AGCTGTGACCAAGTTTGTCCACACTAGAAATTGAAAATAGAGCCCAAGACCTTCATCTCT
ASCRP3002165	51	44	44.5	73	66.5	133.5	51	47	41	260	285	226	hsa_circRNA_103182	hsa_circ_0003720	circBase	chr22	+	24730377	24734445	exonic	NM_015330	SPECC1L	AGCTGTGTCCCCTATGCAGGCAAGAGGAGGAGCGAGGCCGGGTATACAATTACATGAATG
ASCRP3002167	25	27	19	62	24	42	48	70.5	48	94	106	81	hsa_circRNA_406563		25070500	chr4	+	174309663	174325105	antisense	NM_007281	SCRG1	AGCTGTTTCACAGACACAAGCATCTGGTGAGTGACTAAAATGTAAAGAGATGAGTGGGAG
ASCRP3002168	20	24.5	19	27	38	178	59	124	106	466	980	753	hsa_circRNA_005843	hsa_circ_0005843	circBase	chr2	-	186946056	186951097	sense overlapping	NR_110218	LINC01473	AGCTTCCAAATCAGCACAGTTTTTAAAGTATCTAGTGTATATAAGGACAAGCCATTCTCA
ASCRP3002169	27	29	25	31	24	668	46.5	169	69	1101	2318	1540	hsa_circRNA_003484	hsa_circ_0003484	circBase	chr2	-	215657020	215661841	exonic	NM_000465	BARD1	AGCTTCGAAATTTGCTACATGACAATGAGCTGTCAGTACTAACATTCTGAGAGAGCCTGT
ASCRP3002171	22	26	24	28	22	871	69	165	144	1295.5	1609	1059	hsa_circRNA_104123	hsa_circ_0076780	circBase	chr6	+	52941283	52945896	exonic	NM_012347	FBXO9	AGCTTGAGAGCAGTCAGATTCACATATCAGGCTCGAGAACTCTTCCTAAAAGCAGTAGAA
ASCRP3002172	167	1433.5	1811	353	244	93	1685	4732.5	1100	270	415	175	hsa_circRNA_092523	hsa_circ_0001255	circBase	chr22	+	50618381	50618469	sense overlapping	NM_052839	PANX2	AGCTTGAGTGGGAGTGTGTGAGCGTGAGCGAGCGGGTGTGTATGTACGAGTGTGCACGTG
ASCRP3002173	19.5	21	20	19	20	32	28.5	57	47	89	95	79	hsa_circRNA_101280	hsa_circ_0000497	circBase	chr13	+	78293666	78327493	exonic	NM_001040153	SLAIN1	AGCTTGCATGGAGCTGGAAATGGAATTTCAAGAATACAATCTTGTAGTTATACATTGGCT
ASCRP3002174	23.5	21.5	18.5	18.5	23	42	48	183	76.5	66	101	69	hsa_circRNA_001231	hsa_circ_0001231	circBase	chr22	-	38917612	38964294	exonic	NM_007068	DMC1	AGCTTGCGAAAGGGAAGAGGAGAGCTCAGAATTGCCAAGATTTATGACAGAAGTGATTAT
ASCRP3002175	25.5	23	21	25.5	32	58	29	21	20	93	85	89	hsa_circRNA_406376		25070500	chr3	-	145701394	145708714	intergenic			AGCTTGCTCATGAATACCCCAATGGTCCTCATGATAATACCCCAACTAGACCTTTAACTT
ASCRP3002176	8684.5	4575	5040	5360.5	1384	19183	29070	10780.5	7416	12992	27622.5	20482.5	hsa_circRNA_000585	hsa_circ_0000515	circBase	chr14	-	20811305	20811534	sense overlapping	NR_002312	RPPH1	AGCTTGGAACAGACTCACGGCCAGCGAACTGAGTGCGTCCTGTCACTCCACTCCCATGTC
ASCRP3002177	27	30	33	35	33	41.5	67	406	87.5	88	91.5	63.5	hsa_circRNA_006971	hsa_circ_0006971	circBase	chrX	-	14868626	14877456	exonic	NM_152633	FANCB	AGCTTGGTTGTTGGAGTGAAAACTACATCTTCTTTGAAGCTGTTGCTGCTAAATGGGAAA
ASCRP3002178	21	22	21	24	26	55	31	32.5	25	96	122	85	hsa_circRNA_007322	hsa_circ_0007322	circBase	chr1	-	47767232	47776034	exonic	NM_003035	STIL	AGCTTTAAAGGATACTGAGGATTTGGAATTAAAGAAATCATTCACCAGACATCATGGAGC
ASCRP3002179	227	417	216	330	119	1441.5	895	1110.5	213.5	1709	1614.5	969	hsa_circRNA_008068	hsa_circ_0008068	circBase	chr13	-	30801548	30857928	exonic	NM_032116	KATNAL1	AGCTTTGCGAAGAAGGTTAGAAAAAAGGATATATATACCTCTCCCAACAGGTCTCTGAAA
ASCRP3002180	69	40.5	33	116	133.5	2150	181.5	440	890.5	14235	23313.5	15492	hsa_circRNA_102097	hsa_circ_0044195	circBase	chr17	+	44380003	44383675	exonic	NM_014834	LRRC37A	AGCTTTGGAACATTTCAGGCCTGGCACGGAATGCAGTTTTTACATAAGTTAATTCTCAGA
ASCRP3002181	26	23.5	23.5	25	22	315	68	212	198	544	1055.5	656	hsa_circRNA_092427	hsa_circ_0000629	circBase	chr15	+	72810407	72853890	exonic	NM_005744	ARIH1	AGCTTTGTAGAGAATCCAGCAACTATCACAAGAATACTCCTTAGCCACTTCAATTGGGAT
ASCRP3002182	34	31	32	46	34	132	221.5	649.5	375	348	490	353.5	hsa_circRNA_104548	hsa_circ_0001777	circBase	chr7	-	158580694	158591763	exonic	NM_020728	ESYT2	AGCTTTGTCTATCTTCTTCCTTAGGAAACCAGTTCATTTTCCAGACACTGAAAGAGCAGA
ASCRP3002183	21.5	18	16	26	20	34	30	67	22	68	59	58	hsa_circRNA_406808		25070500	chr6	-	84894904	84913814	exonic	NM_014895	CEP162	AGGAAAAAAGAAAATTACAGTGATGATTTTGAAGATGAGTATGTTGGTGCACCGTTGACT
ASCRP3002184	30	25	22.5	26	22	78.5	95	260	180.5	264	411.5	280	hsa_circRNA_103427	hsa_circ_0001324	circBase	chr3	+	107429298	107435696	exonic	NM_020235	BBX	AGGAAAAGCAGAAATACACAGACATGGCCAAGGAGGTCACAGTAATGAAAGGCAGTAATA
ASCRP3002185	27	26	25	24	25.5	88	73	67	33	113	138.5	125	hsa_circRNA_014784	hsa_circ_0014784	circBase	chr1	-	156711898	156713247	exonic	NM_004494	HDGF	AGGAAAATAAAACCCGTTGATTACTATACCTGTAGCCACCAATGTTTCAAGAGGAGCCCC
ASCRP3002187	25	26	29	25	22	704	41.5	71	76	2609	4907	3402	hsa_circRNA_037809	hsa_circ_0037809	circBase	chr16	+	10567335	10574821	exonic	NM_024997	ATF7IP2	AGGAAACAACCCCATTGGCACAAAATGCAGTCCAGATACCAGAAAAATTACATCAGGAAA
ASCRP3002189	33.5	24.5	21	37	30.5	44	116	312	188	108	167	132	hsa_circRNA_001574	hsa_circ_0001574	circBase	chr6	+	7602855	7606428	exonic	NM_152551	SNRNP48	AGGAAAGAGAGACAATAGTCGAAAAAGTCCAAAATCCTACCTTGAAATCCTGGCAGAAGT
ASCRP3002190	24	24	21	24	26	31	32	27	31.5	69.5	62	56.5	hsa_circRNA_000541	hsa_circ_0000541	circBase	chr14	+	56746393	56757174	exonic	NM_021255	PELI2	AGGAAAGCTGGCTATCAGCTGCAAAGGTCAACACAGTATATCCTACACTTTGTCAAGGAA
ASCRP3002191	33	30	28.5	33	36	39	46.5	47	39	60	64	61	hsa_circRNA_000587	hsa_circ_0000587	circBase	chr15	-	28491026	28518150	exonic	NM_004667	HERC2	AGGAAAGGAACGGGATGATCATGAAGAGTTAGCCTGGCCTGGCATAATGGGGATGTTCAC
ASCRP3002192	24	25	22	27	25	48	45	50	45	97.5	134	118	hsa_circRNA_104570	hsa_circ_0004219	circBase	chr8	+	25156459	25158173	exonic	NM_024940	DOCK5	AGGAAATAGAGAAGCTCAATAACCTCCAAGCAGTGTTTACATCAATCCTGCAGAACCTCG
ASCRP3002193	20	21	20	42	32	31.5	31	52	26	57	57	50	hsa_circRNA_101358	hsa_circ_0032010	circBase	chr14	-	55451440	55467710	exonic	NM_007086	WDHD1	AGGAAATCCTACCTTGCATGGATTGGGTTTTCAGCTGAAGACCCTCAATATAGTAACCTG
ASCRP3002194	19	23	19	18	18	42	26	55	51	77	82	68	hsa_circRNA_006402	hsa_circ_0006402	circBase	chr2	+	47635539	47672796	exonic	NM_000251	MSH2	AGGAAATGATAGAAACAACTTTAGATATGGATCAGGAGCAAAGAATCTGCAGAGTGTTGT
ASCRP3002195	28	28	35	24	22	103	242	166	144.5	144.5	138.5	109	hsa_circRNA_104700	hsa_circ_0005273	circBase	chr8	-	141710989	141716304	exonic	NM_005607	PTK2	AGGAAATGGAAGAAGATCAGCGCTGGCTGGAAAAAGAGGAAAGATTTCTGCCCAGCAGAC
ASCRP3002196	18	24	20	18	20	166	41	73	76	375	475	313	hsa_circRNA_015115	hsa_circ_0015115	circBase	chr1	+	167935866	168020171	exonic	NM_001198956	DCAF6	AGGAACAACAATAGGTGATAGAATAATGAGGTTAATACAATCTGTTGGAATGACACTGGA
ASCRP3002198	31	25	23	61	70	39	35	41	28	65	62	57	hsa_circRNA_406811		25070500	chr6	+	88081310	88093478	sense overlapping	uc021zck.1	SMIM8	AGGAACAGTTTGGTGTTACAGCTCTAAAAATCTCCAGCAAACTCTATTAGGAACTTTCCA
ASCRP3002199	24	23	21	21	21	33	37	28.5	25	65	65	56	hsa_circRNA_004275	hsa_circ_0004275	circBase	chr14	+	102873674	102894719	exonic	NM_014844	TECPR2	AGGAACATTATAAGAATTTCAAGCAGGCCTGAAGGATTAACATCAACAGGGGAAGACGGA
ASCRP3002200	21	26	23	29	21.5	110	40	35.5	47	375	418.5	330.5	hsa_circRNA_054595	hsa_circ_0054595	circBase	chr2	-	55209650	55255356	exonic	NM_020532	RTN4	AGGAACTCAGGCGCCTCTTCTTAGTTGATGATTTAGTTGATTCTCTGAAGATGAGACCCT
ASCRP3002201	28	22	20	31	30	45	50	39	36	132.5	164	112	hsa_circRNA_002353	hsa_circ_0002353	circBase	chr6	-	16586010	16658132	exonic	NM_000332	ATXN1	AGGAACTGATAGCTTATGGTTCTCCATTGTGATGAAAGCACATGGTACAGCATACTGGAG
ASCRP3002202	21	24	21	29	54	57	38	38	34	134	270.5	181	hsa_circRNA_001319	hsa_circ_0001319	circBase	chr3	-	69077050	69077446	exonic	NM_007114	TMF1	AGGAAGAAAGCCATTTTTACTCAAGAAACAATAAAAGAAAAGGTACCAGGTTGAATTGGA
ASCRP3002205	24	25	22	23	20	51	29	22	26	70	63.5	64	hsa_circRNA_406690		25070500	chr5	+	143586380	143586631	sense overlapping	NM_020768	KCTD16	AGGAAGACTGAAAAGGGAAGCTGAATACTTCCAGCTCCCAGACTTGTTTATTTTACTCGC
ASCRP3002206	26	24	22	28	28	61	32	60	38	94	120.5	102	hsa_circRNA_404908		25070500	chr11	+	73936249	73950301	exonic	NM_016147	PPME1	AGGAAGATGACATGGAGGTGAAACAAAGGTCAAGAATCCTGAAGATCTGTCTGCAGAAAC
ASCRP3002208	23	23	18	30	26	121	50	235	141	215	444	331	hsa_circRNA_404628		25070500	chr1	+	186375214	186381025	exonic	ENST00000478571	C1orf27	AGGAAGCAAAACAGCAATTTGGAAAGTTTAGATTCTGAAAAAGAGTTCCACGTCCTCCCT
ASCRP3002209	22	23	20	28	37	27	34	20	22	62	74	58	hsa_circRNA_101168	hsa_circ_0006150	circBase	chr12	+	117423010	117426674	exonic	NM_012174	FBXW8	AGGAAGCAAGGGTTTCTTAATATTTGGGATTTAAGGACCGGAAAGTACCCTGTTCATCGT
ASCRP3002210	25	25	23	25	27	107	41.5	81	58	195	343.5	221.5	hsa_circRNA_102140	hsa_circ_0044927	circBase	chr17	-	58275620	58292135	exonic	NM_032582	USP32	AGGAAGCTAGTAATCATGCCCAGGATTGGAAATGTACCTTCTCCGAATGCACCTTTAAAG
ASCRP3002213	29	20	18	39	29	37	66	152.5	112	105.5	130	103.5	hsa_circRNA_047376	hsa_circ_0047376	circBase	chr18	+	29691716	29691882	exonic	NM_016271	RNF138	AGGAAGTTTTCTGGTAGCTGCAGATGCTGTGCAAAACAGTTTCTGTAGAAAATGTTTCCT
ASCRP3002216	24.5	20	18	30	27	34	34	37	35	84.5	108	92	hsa_circRNA_013338	hsa_circ_0013338	circBase	chr1	+	101372407	101377794	exonic	NM_133496	SLC30A7	AGGAATATTTGTTTTCAAACATGGAGGTCATGGACATTCTCATGGCTCTGCTTAGGCTTG
ASCRP3002219	18	19	19	18	18	51.5	37.5	56.5	48	132	164	105	hsa_circRNA_008498	hsa_circ_0008498	circBase	chr16	-	23113639	23119504	exonic	NM_020718	USP31	AGGAATTCTCAGTCAAAGAGACTATTGTGTCAAAGAATGCACTGCAGTACCGGGGAAATT
ASCRP3002220	27	26.5	20	31	20	287	150	489	267	1258	2192	1029	hsa_circRNA_001468	hsa_circ_0000444	circBase	chr12	-	116668337	116678267	sense overlapping	NM_015335	MED13L	AGGAATTGTATTTGCAGTATTTGGATTTATTTATTTTTCAGATTGATGTCAGGGTTTCTG
ASCRP3002221	22	28	23	21	20	32.5	52	38	68	74.5	63	63.5	hsa_circRNA_007919	hsa_circ_0007919	circBase	chr17	-	953289	1003975	exonic	NM_001092	ABR	AGGACAACAATGAGATCGTGGACAAGATCATGGGCAAAGGACAGATCCAGGTGGAAGCAG
ASCRP3002222	21	24.5	26	24	22	79	50	93	75.5	308	637	397.5	hsa_circRNA_103008	hsa_circ_0003298	circBase	chr20	+	21346058	21349228	exonic	NM_012255	XRN2	AGGACAAGCCCAGATTCCAAAACTTATGTCAATATTAATTTTAAAGACCCACAGTTTGCT
ASCRP3002223	22.5	22	20	20	24	77	70	834	209.5	222	524.5	322	hsa_circRNA_100918	hsa_circ_0023918	circBase	chr11	-	85701292	85742653	exonic	NM_007166	PICALM	AGGACACCTACTCATGAAATGTTTGTTGACTTAATTCAGTGCACAAATGAGATGAATGTG
ASCRP3002224	17.5	22	20	19	18	32	31	79.5	58	76	118	98	hsa_circRNA_103734	hsa_circ_0009133	circBase	chr4	-	128842678	128861152	exonic	NM_152778	MFSD8	AGGACCAAAACCTCAGTTTTTCAGACTTGTTTTACATTCCTTGGAGAAAAAGGTGTGACA
ASCRP3002225	25	21.5	23	24	26	38	32	29	19	62	61	68	hsa_circRNA_042372	hsa_circ_0042372	circBase	chr17	+	19445705	19451446	exonic	NM_018242	SLC47A1	AGGACCCAGATGTGTCCAGTTCTTGGTTCAGCTGATGGTGTTCCTGATCAGCTTCATAAG
ASCRP3002226	33	23.5	24	40	36	33	28	24	23	66	50	51	hsa_circRNA_406555		25070500	chr4	+	159547971	159554628	exonic	NM_021634	RXFP1	AGGACCTGAAGGAGCTGTCACAATTGGACCTTGAAGGCAACCATATCCATAATTTAAGAA
ASCRP3002227	26	23	23	28	29	74	41	58	54	162	232	174.5	hsa_circRNA_103454	hsa_circ_0067103	circBase	chr3	-	125032151	125032500	exonic	NM_021964	ZNF148	AGGACTACAGTATGCACTTAATGTCCCTGCAGTTATACTTAAGCATGAACATTGACGACA
ASCRP3002228	41	24	23	42	36	39	30.5	24	20	71	57	54	hsa_circRNA_101622	hsa_circ_0003893	circBase	chr15	+	81229014	81230320	exonic	NM_018689	CEMIP	AGGACTCAGGATGTACATTCAAGCCTACAAGACCAGTAACCTGCGAATGAAGATCATCAA
ASCRP3002229	24	22	20	26	25	60	32	24	21	83	81	76.5	hsa_circRNA_002649	hsa_circ_0002649	circBase	chr5	-	39382719	39388954	exonic	NM_001343	DAB2	AGGACTGCTAAGAATGGGAGTGAGGCCCTAATGATTCTAGATGACCAAACTAACAAACTG
ASCRP3002232	36	35	32	40	39	106	47	28	36	145	106	99	hsa_circRNA_404488		25070500	chr1	+	41456925	41457407	intronic	ENST00000372616	CTPS1	AGGAGAAACCCCTACTTCTGTCATTTTTTCCTTCTATTTCCTGATAGCTGGTTGCAGTGT
ASCRP3002234	38	29	25	51.5	49	37.5	31	22	24	60	70.5	66	hsa_circRNA_402092		25242744	chr19	+	37098453	37101644	exonic	NM_032825	ZNF382	AGGAGAAGAGCTATGGACACAGAGAATTTTTCCAAGTTACAGCTACCTAGGACTGTTTCT
ASCRP3002235	21	22	20	20	21.5	51	56	98.5	59	99	136	98	hsa_circRNA_006020	hsa_circ_0006020	circBase	chrX	+	16836696	16838378	exonic	NM_018360	TXLNG	AGGAGAAGCTGGCAGCTCTCTGTAAGAAATATGCTGATCTTTTTGAAATTGGCACAATGG
ASCRP3002238	19.5	20	15	21	24	39	27	19	22	63	67	58	hsa_circRNA_085692	hsa_circ_0085692	circBase	chr8	-	141262875	141310713	exonic	NM_031466	TRAPPC9	AGGAGAATCTCCTGCAGGATCTCAGTGATGGCATGTGAAACTATTGAACCTTCCTGCTAG
ASCRP3002239	55	37	30	75.5	92	48	54	32	40	105	103	96	hsa_circRNA_102289	hsa_circ_0046760	circBase	chr18	-	6237962	6312055	exonic	NM_173464	L3MBTL4	AGGAGAATGGAAGAACTCTGATAGCACCCCAAGATTGCTATGCTATGCCTTGTATGACTA
ASCRP3002240	24	22	22	24	22.5	114.5	45	249	87	142	191	157	hsa_circRNA_102912	hsa_circ_0058055	circBase	chr2	-	215645283	215661841	exonic	NM_000465	BARD1	AGGAGAGACTTTGCTCCATATTGCTTCTATTAAGTACTAACATTCTGAGAGAGCCTGTGT
ASCRP3002241	122	120.5	127	105	100	88	70	181	162	146.5	172.5	132	hsa_circRNA_102850	hsa_circ_0001081	circBase	chr2	+	172305190	172314987	exonic	NM_025000	DCAF17	AGGAGAGGCTCCTTTTGGCATTCCTTGTAATATTAAAATCACAGGGAGATATACTTCCCA
ASCRP3002243	50	32	35	62	52.5	31	49	34	33	55	52	46	hsa_circRNA_405038		25070500	chr12	-	90069894	90071593	intronic	ENST00000428670	ATP2B1	AGGAGCACCTACAATGGGAGAGAGGAGATTGGGAGGTTCTCTAAGATTGGTTTTTGATTA
ASCRP3002244	21.5	20	20	20	23	35	30	26.5	21	76	83	66	hsa_circRNA_001961	hsa_circ_0001912	circBase	chrX	+	18525058	18528978	sense overlapping	NM_003159	CDKL5	AGGAGCCTATGGAGTTGTACTTAAATGCAGACACAAGGCAATCATTTAATACTTCATGAT
ASCRP3002245	66	29	23	69	33	2440.5	189	599.5	581	4019	11163	6337.5	hsa_circRNA_104911	hsa_circ_0088474	circBase	chr9	-	126519981	126531842	exonic	NM_020946	DENND1A	AGGAGCGAAGAGCTGCTTCTGTATCTTAAGGAAGTTCTACAGACTTTGACCAAGTTTTGT
ASCRP3002246	46	25	23	51	32	1248	116	415	345.5	2718.5	6846.5	4252	hsa_circRNA_104913	hsa_circ_0002544	circBase	chr9	-	126519981	126641300	exonic	NM_020946	DENND1A	AGGAGCGAAGAGCTGCTTCTGTATCTTAAGGCAGAATCCAGAGACCACATTTGAAGTATA
ASCRP3002247	28	20.5	21	21	23	684	52	70	64.5	1628	3226	2330.5	hsa_circRNA_079804	hsa_circ_0079804	circBase	chr7	-	33066428	33075600	exonic	NM_016489	NT5C3A	AGGAGCTGCCAAACTTCAGAAGATTGGATAACCAAGAAATGACTAATCAAGAGTCTGCCG
ASCRP3002248	19	23	16.5	25	23	125	30	23	23	274	613.5	414.5	hsa_circRNA_006560	hsa_circ_0006560	circBase	chr3	-	122081814	122084313	exonic	ENST00000466854	CCDC58	AGGAGCTGGAAGTTTGCTATGAAGATTATGGAATCAGAGAGAGCTCTTGGAGATGGTACA
ASCRP3002249	32	28	19	28	27	44	41.5	26	36	85	102	89	hsa_circRNA_006752	hsa_circ_0006752	circBase	chr22	+	30032739	30035201	exonic	NM_000268	NF2	AGGAGCTGGTTCAGGAGATCACACAACATTTATTCTTCTTACAGATGAAGTGGAAAGGGA
ASCRP3002250	30.5	29	32	37	39	185	103	239.5	203	469	906	533	hsa_circRNA_003493	hsa_circ_0003493	circBase	chr2	+	203818727	203820481	exonic	NM_024744	CARF	AGGAGCTGTGAGATGTCCCTGAAGAGAAACCCAGTAACAGAAACTTACCAACTGTAAGAG
ASCRP3002251	37	37	34	36	39.5	76	41.5	29	32.5	106.5	93	75	hsa_circRNA_101174	hsa_circ_0028864	circBase	chr12	-	120636920	120637008	exonic	NM_001002	RPLP0	AGGAGGACCTCACTGAGATCAGGGACATGTTGCTGGCCAATAAGACTGCTGCCTCATATC
ASCRP3002253	27	26	22	26	29.5	113	82	290.5	214.5	204.5	352	173	hsa_circRNA_103389	hsa_circ_0001309	circBase	chr3	-	52771601	52775515	exonic	NM_003157	NEK4	AGGAGGAGGATGAATTTGATAGAGAGGAAAGGAAACAGATTCATTGTCTGTCTGAGGATG
ASCRP3002254	34	24	22	34	33	35	31	23	25	62.5	57	59.5	hsa_circRNA_405153		25070500	chr13	-	52971366	52976829	intronic	ENST00000544466	THSD1	AGGAGGAGTGCATGCTAATTCAGAGAAATACAGGTTCTAATTTCAGGTGTTTTTGGGGAA
ASCRP3002255	24	28	23.5	28.5	22	59	151.5	724	290	124	275	160.5	hsa_circRNA_101691	hsa_circ_0007637	circBase	chr16	-	3900297	3901010	exonic	NM_004380	CREBBP	AGGAGGCATGGCCAAGATTTTGGATCATTGTTTGACTTGGAAAATGATCTTCCTGATGAG
ASCRP3002257	33	38	48	74.5	69	41	50	96	43	95	90	69.5	hsa_circRNA_406500		25070500	chr4	-	88084709	88116842	sense overlapping	NM_020803	KLHL8	AGGAGTAGCTGTGTGTTCCTGTTTAACTAGCCAAATTCGAGATTCACAGCAAACTGTACA
ASCRP3002258	22	24	23	22	19	34	33.5	62	48	95	87	81	hsa_circRNA_402369		25242744	chr2	+	135887564	135888291	exonic	NM_012233	RAB3GAP1	AGGAGTCACCGCTAAATAATGATGTTCTTAATACTATTCTCCTGGTGATTTTGTCACTGA
ASCRP3002259	204	245	186	288	195	3369	233.5	152	147	3259	2284	2362	hsa_circRNA_003785	hsa_circ_0003785	circBase	chr18	+	32902351	32907027	sense overlapping	TCONS_00026319	XLOC_012658	AGGAGTCTGCAGAGAAGTCTTCTCTTTCTTCCTCACCCCATAGTAAGACTAGGACTCAAT
ASCRP3002260	30	56.5	44.5	33	21	1190.5	176	611	346	1649	1567	1324	hsa_circRNA_103639	hsa_circ_0007646	circBase	chr4	+	52729602	52758017	exonic	NM_015115	DCUN1D4	AGGAGTGGTTAAAAGGAATGACTTCTCTCCAATTTTCAGCTGAACTCTCATCTCTCAACA
ASCRP3002261	26.5	21	20	42	30	38	30	23	26	74	80	70.5	hsa_circRNA_404413		25242744	chrX	-	130498722	130533678	exonic	uc004ewf.2	IGSF1	AGGAGTTTGCTGTTTTCTCAGTCTCCTGAGAAATTCCAGGATACAAGTGATGCCTTCAAA
ASCRP3002262	20	20	18	21	20	56	33	47	45	121	174	144	hsa_circRNA_405276		25070500	chr14	-	91409421	91444868	exonic	NM_004755	RPS6KA5	AGGAGTTTGTGGCTGATGAACTTATGGAAAAGTATTTCTAGTTCGTAAAATAAGTGGCCA
ASCRP3002263	31	32	29	32	33	2259.5	58	110	101	4241	7110	4873	hsa_circRNA_001263	hsa_circ_0001263	circBase	chr3	+	5215701	5216099	exonic	NM_018184	ARL8B	AGGATAATATAGGTGCTAGTGCTTGGAAACAAGAGAGATCTTCCTAATGCCTTGGATGAG
ASCRP3002264	24	22	17	28	26	150	46	110	92.5	466.5	758	513.5	hsa_circRNA_005046	hsa_circ_0005046	circBase	chr3	+	5212187	5216099	exonic	NM_018184	ARL8B	AGGATAATATAGTCAGGTCAATTCAGTGAAGATATGATACCCACAGTGGGCTTCAACATG
ASCRP3002265	31	26	23.5	26	20	112.5	176	1042	500	342	548.5	384	hsa_circRNA_102957	hsa_circ_0001116	circBase	chr2	-	239090705	239093928	exonic	NM_030768	ILKAP	AGGATACAGAAGGCTGGAGGAAACGTCAGTACTCGGGTTTCATATTTTGCTGTTTTTGAT
ASCRP3002266	23	26	28	45	42	34	35	44	27	59	49	51	hsa_circRNA_104564	hsa_circ_0083444	circBase	chr8	-	17601112	17613470	exonic	NM_001001924	MTUS1	AGGATCAGGCGTGTGTCCAGTTCTGGGAACAACAAATCATTTAATCTTCAGAGCATCTTA
ASCRP3002267	26	26	27	29	28	106	32	28	30	166	291	174	hsa_circRNA_103792	hsa_circ_0003037	circBase	chr5	+	14270933	14280545	exonic	NM_007118	TRIO	AGGATCTCAGGAGACTCATTTCCTATCTAGCCTGTATTCCCAGGGTTTCGAAAAAACGAT
ASCRP3002269	31	23	21	23	45	49	44	127	55	156.5	276	205	hsa_circRNA_078244	hsa_circ_0078244	circBase	chr6	+	150092297	150111194	exonic	NM_005389	PCMT1	AGGATCTGGAAGTGGAATCCTTACTGCATGTTTTGCACGTATGAAAATGGAATCATCAAG
ASCRP3002270	25	25	27	33	31	35	44	77	50	69	65	57.5	hsa_circRNA_000992	hsa_circ_0000992	circBase	chr2	-	37543379	37544322	exonic	ENST00000379066	PRKD3	AGGATCTTGTGTGCTCCATAGTTTATCAAAAGGCTAACTATATGTCAGAAAGCATCAGCT
ASCRP3002272	24.5	22.5	23.5	28.5	25.5	57	31	41	35	97	129	103	hsa_circRNA_101421	hsa_circ_0032876	circBase	chr14	-	89192884	89212627	exonic	NM_183387	EML5	AGGATGGCTCATTCACTGTACTTAGAGTAAGCGCTTGGTTTCAGTTGGACTTGATTCAAA
ASCRP3002273	121	118	84	198	131	427	209	244.5	133	616.5	670	587	hsa_circRNA_103349	hsa_circ_0065217	circBase	chr3	-	47468646	47470160	exonic	NM_012235	SCAP	AGGATGGTCTCCTACACCATCACCCTGGTCTTCCAGCACTACCATGCCAATATGTGGGTG
ASCRP3002274	22	20.5	21	20	20	39	30.5	56	37.5	112	126.5	109	hsa_circRNA_101342	hsa_circ_0031608	circBase	chr14	-	35055435	35078948	exonic	NM_021249	SNX6	AGGATTCTACAGATATATGCAACTTAAAGCAATAAATGTAGATCTTCAAAGTGATGCTGC
ASCRP3002275	17.5	21	20	18	20	39	37.5	141.5	62	77.5	117	87	hsa_circRNA_052967	hsa_circ_0052967	circBase	chr2	+	24181170	24207701	exonic	NM_181713	UBXN2A	AGGATTGTCCAGAAATTTAACATTACTCATAGTAAGGCGAAAGAGAATGAAAGACGTAGA
ASCRP3002276	22	22	19	23	21	147	36.5	77	49	214	396	297	hsa_circRNA_406289		25070500	chr3	-	60751256	60752831	intronic	ENST00000468189	FHIT	AGGATTTTTAGTGCTCAATTCAAGACGTAAGTTTTGCAAGCCAAATGGGTCAGCGATGAG
ASCRP3002277	76	59	20	31	33	133	175	218	150	286	510	372	hsa_circRNA_101823	hsa_circ_0039697	circBase	chr16	-	58616696	58617086	exonic	NM_016284	CNOT1	AGGCACACACATGGAATGTAGAAGTCTTGATTGACGTTCTTAAAGAACTGTATTGAAGAA
ASCRP3002278	63	196	225	56	45	42	77	177	129	4091.5	93	1882	hsa_circRNA_406237		25070500	chr3	+	16336362	16345099	exonic	uc003cax.3	OXNAD1	AGGCAGAAAAAATAAAGAGGGTTGATTTCTTTATTCCAGGAGTCTCTGTGGTTGGTGGGT
ASCRP3002280	26	24	23.5	25	28	77	80.5	347.5	71	156	275	177	hsa_circRNA_100793	hsa_circ_0021712	circBase	chr11	+	34978930	34999729	exonic	NM_003477	PDHX	AGGCAGCAGCTGTTACCCTTAAAGTTGAAGAAGGAAGTAAAAATATACGGCTAGGTTCAC
ASCRP3002281	21	20.5	18	24	22	31	30	22	26	65	77	68	hsa_circRNA_406377		25070500	chr3	+	148857790	148863333	exonic	NM_032383	HPS3	AGGCAGTACTCACGCCACAATTTTTGCACGTCATTACAAGGAGATTATTTGGTAGCAATT
ASCRP3002282	22	22	23	24	23	77	34	43	34	110	213	124	hsa_circRNA_100948	hsa_circ_0007512	circBase	chr11	+	108002633	108005043	exonic	NM_000019	ACAT1	AGGCAGTATTGGGTGCAGGAAATAAGATATGTGGAACGGAGTTATGTATCAAAACCCACT
ASCRP3002283	21	19	16	22	24	49	36.5	112.5	54	97	145.5	127.5	hsa_circRNA_001234	hsa_circ_0000187	circBase	chr1	+	222997225	223008557	exonic	ENST00000442171	RP11-452F19.3	AGGCATATACCAAGCTGTCAGAAGCAGCTTCATTTAAAAGGAGTTGAGAAGAGGAGGAAG
ASCRP3002284	31	22	22	33	30.5	67	68	102	146	220	262	233.5	hsa_circRNA_101019	hsa_circ_0006420	circBase	chr12	+	19615443	19626289	exonic	NM_153207	AEBP2	AGGCATATGCTGACACACAGTGGAGACAAACCTTTCAAGCATAAGCAGTACTATAATGGA
ASCRP3002286	34	27	27	27	27	97	216.5	2793.5	806	321.5	499	326.5	hsa_circRNA_104000	hsa_circ_0009145	circBase	chr5	+	167915606	167919852	exonic	NM_002887	RARS	AGGCCAAGTTTGGGGACTATCAGTGTAATAGTGCTATGGGTATTTCTCAGGAAGAAGAGA
ASCRP3002287	23	25.5	21	23	21	50	46	97	118	139	248	172	hsa_circRNA_102126	hsa_circ_0044638	circBase	chr17	-	49059884	49063139	exonic	NM_003971	SPAG9	AGGCCATGAAAATAGAGTTTGTATGTCCATTCATCTGTAGCCCAGTGGAGGAAATGTCTC
ASCRP3002288	45.5	46	60	47	40	154	61	45	42.5	287	327	271	hsa_circRNA_001357	hsa_circ_0001357	circBase	chr3	-	167217940	167254788	exonic	NM_178824	WDR49	AGGCCCCGTCACTTTTTAAAAGGCTATTACTGTGTTTCGACCCCAAAACTTCAATCAATT
[truncated: 9,467 more rows]
